# Supplementary material for: Comprehensive Analysis of Coding and Non-coding RNA Transcriptomes Related to Hypoxic Adaptation in Tibetan Chickens
Source: Research Square preprint supplement (doi:10.21203/rs.3.rs-111085/v1), 2020-11-20
Supplement: Supplementary file 1 [file 252ad02159286d1ab9c5ec5c.xlsx]

## Sheet: known lncRNAs
Table S3a. 3194 know lncRNAs.
query_id	db_id	identify	coverage	database	query_length	db_length	match_length	mis-match	gap	query_star	query_end	db_star	db_end	e-value	score
MSTRG.154032.1	NONGGAT011498.2	98.1	1	noncode	473	50	473	9	0	1	473	1650	1178	0	824
MSTRG.154032.1	NONGGAT011498.2	98.1	1	noncode	473	50	473	9	0	1	473	1650	1178	0	824
MSTRG.68039.2	NONGGAT004759.2	100	1	noncode	488	50	488	0	0	1	488	737	1224	0	902
MSTRG.68039.2	NONGGAT004759.2	100	1	noncode	488	50	488	0	0	1	488	737	1224	0	902
MSTRG.68039.2	NONGGAT004757.2	100	0.83	noncode	488	50	407	0	0	82	488	3288	3694	0	752
MSTRG.68039.2	NONGGAT004757.2	100	0.83	noncode	488	50	407	0	0	82	488	3288	3694	0	752
MSTRG.44133.1	NONGGAT003275.2	100	1	noncode	219	50	219	0	0	1	219	378	596	2e-111	405
MSTRG.44133.1	NONGGAT003275.2	100	1	noncode	219	50	219	0	0	1	219	378	596	2e-111	405
MSTRG.134862.1	NONGGAT014020.1	95.24	1	noncode	233	50	231	10	1	3	233	1921	2150	4e-99	364
MSTRG.134862.1	NONGGAT014020.1	95.24	1	noncode	233	50	231	10	1	3	233	1921	2150	4e-99	364
MSTRG.134862.1	NONGGAT014535.1	94.81	1	noncode	233	50	231	9	3	4	233	1543	1315	6e-97	357
MSTRG.134862.1	NONGGAT014535.1	94.81	1	noncode	233	50	231	9	3	4	233	1543	1315	6e-97	357
MSTRG.134862.1	NONGGAT001769.2	92.21	1	noncode	233	50	231	15	3	2	231	1171	943	6e-87	324
MSTRG.134862.1	NONGGAT001769.2	92.21	1	noncode	233	50	231	15	3	2	231	1171	943	6e-87	324
MSTRG.134862.1	NONGGAT003141.2	95.19	0.81	noncode	233	50	187	8	1	1	187	275	90	5e-78	294
MSTRG.134862.1	NONGGAT003140.2	95.19	0.81	noncode	233	50	187	8	1	1	187	275	90	5e-78	294
MSTRG.134862.1	NONGGAT003139.2	95.19	0.81	noncode	233	50	187	8	1	1	187	275	90	5e-78	294
MSTRG.134862.1	NONGGAT003141.2	95.19	0.81	noncode	233	50	187	8	1	1	187	275	90	5e-78	294
MSTRG.134862.1	NONGGAT003140.2	95.19	0.81	noncode	233	50	187	8	1	1	187	275	90	5e-78	294
MSTRG.134862.1	NONGGAT003139.2	95.19	0.81	noncode	233	50	187	8	1	1	187	275	90	5e-78	294
MSTRG.134862.1	NONGGAT009068.2	89.27	1.01	noncode	233	50	233	20	2	1	231	439	668	8e-76	287
MSTRG.134862.1	NONGGAT009068.2	89.27	1.01	noncode	233	50	233	20	2	1	231	439	668	8e-76	287
MSTRG.134862.1	NONGGAT012967.1	89.52	1	noncode	233	50	229	19	5	1	226	267	41	3e-75	285
MSTRG.134862.1	NONGGAT001309.2	88.94	1.03	noncode	233	50	235	21	4	1	233	3175	3406	3e-75	285
MSTRG.134862.1	NONGGAT012967.1	89.52	1	noncode	233	50	229	19	5	1	226	267	41	3e-75	285
MSTRG.134862.1	NONGGAT001309.2	88.94	1.03	noncode	233	50	235	21	4	1	233	3175	3406	3e-75	285
MSTRG.134862.1	NONGGAT002514.2	90	0.95	noncode	233	50	220	20	2	15	233	400	182	1e-74	283
MSTRG.134862.1	NONGGAT002514.2	90	0.95	noncode	233	50	220	20	2	15	233	400	182	1e-74	283
MSTRG.134862.1	NONGGAT013012.1	88.51	1.02	noncode	233	50	235	24	3	1	233	2932	2699	4e-74	281
MSTRG.134862.1	NONGGAT013012.1	88.51	1.02	noncode	233	50	235	24	3	1	233	2932	2699	4e-74	281
MSTRG.134862.1	NONGGAT016647.1	89.38	0.99	noncode	233	50	226	19	4	11	233	570	793	1e-73	279
MSTRG.134862.1	NONGGAT012413.1	88.74	1	noncode	233	50	231	23	3	3	231	2323	2552	1e-73	279
MSTRG.134862.1	NONGGAT016647.1	89.38	0.99	noncode	233	50	226	19	4	11	233	570	793	1e-73	279
MSTRG.134862.1	NONGGAT012413.1	88.74	1	noncode	233	50	231	23	3	3	231	2323	2552	1e-73	279
MSTRG.134862.1	NONGGAT016668.1	87.61	0.98	noncode	233	50	226	25	3	3	226	98	322	2e-67	259
MSTRG.134862.1	NONGGAT014129.1	90.45	0.87	noncode	233	50	199	16	3	4	200	198	1	2e-67	259
MSTRG.134862.1	NONGGAT016668.1	87.61	0.98	noncode	233	50	226	25	3	3	226	98	322	2e-67	259
MSTRG.134862.1	NONGGAT014129.1	90.45	0.87	noncode	233	50	199	16	3	4	200	198	1	2e-67	259
MSTRG.134862.1	NONGGAT016648.1	90.72	0.85	noncode	233	50	194	13	4	43	233	322	513	9e-66	254
MSTRG.134862.1	NONGGAT016648.1	90.72	0.85	noncode	233	50	194	13	4	43	233	322	513	9e-66	254
MSTRG.134862.1	NONGGAT012594.1	86.5	1.05	noncode	233	50	237	23	8	1	233	729	960	3e-65	252
MSTRG.134862.1	NONGGAT012594.1	86.5	1.05	noncode	233	50	237	23	8	1	233	729	960	3e-65	252
MSTRG.134862.1	NONGGAT016115.1	89.39	0.86	noncode	233	50	198	17	4	11	205	366	170	1e-63	246
MSTRG.134862.1	NONGGAT013049.1	88.41	0.9	noncode	233	50	207	20	4	1	204	1130	1335	1e-63	246
MSTRG.134862.1	NONGGAT016115.1	89.39	0.86	noncode	233	50	198	17	4	11	205	366	170	1e-63	246
MSTRG.134862.1	NONGGAT013049.1	88.41	0.9	noncode	233	50	207	20	4	1	204	1130	1335	1e-63	246
MSTRG.134862.1	NONGGAT014911.1	88.18	0.88	noncode	233	50	203	21	3	1	201	1967	2168	2e-61	239
MSTRG.134862.1	NONGGAT014911.1	88.18	0.88	noncode	233	50	203	21	3	1	201	1967	2168	2e-61	239
MSTRG.134862.1	NONGGAT014506.1	85.59	1	noncode	233	50	229	29	3	6	233	1038	1263	9e-61	237
MSTRG.134862.1	NONGGAT014506.1	85.59	1	noncode	233	50	229	29	3	6	233	1038	1263	9e-61	237
MSTRG.134862.1	NONGGAT012962.1	84.91	1.01	noncode	233	50	232	32	3	1	230	3484	3714	4e-59	231
MSTRG.134862.1	NONGGAT012962.1	84.91	1.01	noncode	233	50	232	32	3	1	230	3484	3714	4e-59	231
MSTRG.45029.5	NONGGAT003346.2	99.88	1	noncode	827	50	823	0	1	6	827	1	823	0	1513
MSTRG.45029.5	NONGGAT003346.2	99.88	1	noncode	827	50	823	0	1	6	827	1	823	0	1513
MSTRG.20046.1	NONGGAT005793.2	87.87	0.91	noncode	447	50	404	48	1	1	404	3576	3174	1e-131	473
MSTRG.20046.1	NONGGAT005793.2	87.87	0.91	noncode	447	50	404	48	1	1	404	3576	3174	1e-131	473
MSTRG.19902.1	NONGGAT016647.1	95.76	1	noncode	236	50	236	10	0	1	236	644	879	4e-104	381
MSTRG.19902.1	NONGGAT016647.1	95.76	1	noncode	236	50	236	10	0	1	236	644	879	4e-104	381
MSTRG.19902.1	NONGGAT012594.1	95.34	1	noncode	236	50	236	11	0	1	236	811	1046	2e-102	375
MSTRG.19902.1	NONGGAT012594.1	95.34	1	noncode	236	50	236	11	0	1	236	811	1046	2e-102	375
MSTRG.19902.1	NONGGAT001309.2	94.44	0.99	noncode	236	50	234	13	0	1	234	3257	3490	5e-98	361
MSTRG.19902.1	NONGGAT001309.2	94.44	0.99	noncode	236	50	234	13	0	1	234	3257	3490	5e-98	361
MSTRG.19902.1	NONGGAT012962.1	94.07	1	noncode	236	50	236	14	0	1	236	3568	3803	2e-97	359
MSTRG.19902.1	NONGGAT012962.1	94.07	1	noncode	236	50	236	14	0	1	236	3568	3803	2e-97	359
MSTRG.19902.1	NONGGAT016648.1	94.74	0.97	noncode	236	50	228	11	1	1	227	364	591	8e-96	353
MSTRG.19902.1	NONGGAT016648.1	94.74	0.97	noncode	236	50	228	11	1	1	227	364	591	8e-96	353
MSTRG.19902.1	NONGGAT014535.1	93.56	0.99	noncode	236	50	233	14	1	4	236	1460	1229	1e-93	346
MSTRG.19902.1	NONGGAT014535.1	93.56	0.99	noncode	236	50	233	14	1	4	236	1460	1229	1e-93	346
MSTRG.19902.1	NONGGAT002514.2	93.72	0.95	noncode	236	50	223	13	1	1	223	331	110	1e-89	333
MSTRG.19902.1	NONGGAT002514.2	93.72	0.95	noncode	236	50	223	13	1	1	223	331	110	1e-89	333
MSTRG.19902.1	NONGGAT012413.1	92.21	0.98	noncode	236	50	231	18	0	1	231	2405	2635	5e-88	327
MSTRG.19902.1	NONGGAT012413.1	92.21	0.98	noncode	236	50	231	18	0	1	231	2405	2635	5e-88	327
MSTRG.19902.1	NONGGAT014020.1	91.85	0.99	noncode	236	50	233	18	1	4	236	2005	2236	7e-87	324
MSTRG.19902.1	NONGGAT012006.2	91.53	1	noncode	236	50	236	19	1	1	236	1260	1026	7e-87	324
MSTRG.19902.1	NONGGAT012006.2	91.53	1	noncode	236	50	236	19	1	1	236	4883	4649	7e-87	324
MSTRG.19902.1	NONGGAT012006.2	91.53	1	noncode	236	50	236	19	1	1	236	8637	8403	7e-87	324
MSTRG.19902.1	NONGGAT014020.1	91.85	0.99	noncode	236	50	233	18	1	4	236	2005	2236	7e-87	324
MSTRG.19902.1	NONGGAT012006.2	91.53	1	noncode	236	50	236	19	1	1	236	1260	1026	7e-87	324
MSTRG.19902.1	NONGGAT012006.2	91.53	1	noncode	236	50	236	19	1	1	236	4883	4649	7e-87	324
MSTRG.19902.1	NONGGAT012006.2	91.53	1	noncode	236	50	236	19	1	1	236	8637	8403	7e-87	324
MSTRG.19902.1	NONGGAT013979.1	94.82	0.82	noncode	236	50	193	10	0	1	193	1776	1584	3e-80	302
MSTRG.19902.1	NONGGAT013979.1	94.82	0.82	noncode	236	50	193	10	0	1	193	1776	1584	3e-80	302
MSTRG.19902.1	NONGGAT014506.1	88.46	1.01	noncode	236	50	234	22	4	4	236	1120	1349	5e-73	278
MSTRG.19902.1	NONGGAT014506.1	88.46	1.01	noncode	236	50	234	22	4	4	236	1120	1349	5e-73	278
MSTRG.19902.1	NONGGAT012758.1	91.01	0.81	noncode	236	50	189	15	2	9	197	637	451	9e-66	254
MSTRG.19902.1	NONGGAT012758.1	91.01	0.81	noncode	236	50	189	15	2	9	197	637	451	9e-66	254
MSTRG.70162.1	NONGGAT004931.2	99.88	1	noncode	854	50	854	1	0	1	854	226	1079	0	1572
MSTRG.70162.1	NONGGAT004931.2	99.88	1	noncode	854	50	854	1	0	1	854	226	1079	0	1572
MSTRG.78422.1	NONGGAT005674.2	100	1	noncode	589	50	589	0	0	1	589	286	874	0	1088
MSTRG.78422.1	NONGGAT005671.2	100	1	noncode	589	50	589	0	0	1	589	286	874	0	1088
MSTRG.78422.1	NONGGAT005674.2	100	1	noncode	589	50	589	0	0	1	589	286	874	0	1088
MSTRG.78422.1	NONGGAT005671.2	100	1	noncode	589	50	589	0	0	1	589	286	874	0	1088
MSTRG.19977.1	NONGGAT014020.1	93.28	1	noncode	255	50	253	15	2	1	253	2164	1914	2e-101	372
MSTRG.19977.1	NONGGAT014020.1	93.28	1	noncode	255	50	253	15	2	1	253	2164	1914	2e-101	372
MSTRG.19977.1	NONGGAT012413.1	92.49	0.99	noncode	255	50	253	19	0	3	255	2566	2314	2e-98	363
MSTRG.19977.1	NONGGAT012413.1	92.49	0.99	noncode	255	50	253	19	0	3	255	2566	2314	2e-98	363
MSTRG.19977.1	NONGGAT013012.1	92.4	0.98	noncode	255	50	250	19	0	1	250	2685	2934	7e-97	357
MSTRG.19977.1	NONGGAT013012.1	92.4	0.98	noncode	255	50	250	19	0	1	250	2685	2934	7e-97	357
MSTRG.19977.1	NONGGAT016647.1	92.03	0.99	noncode	255	50	251	18	1	2	250	806	556	3e-95	351
MSTRG.19977.1	NONGGAT014535.1	91.8	1.02	noncode	255	50	256	16	5	1	254	1301	1553	3e-95	351
MSTRG.19977.1	NONGGAT016647.1	92.03	0.99	noncode	255	50	251	18	1	2	250	806	556	3e-95	351
MSTRG.19977.1	NONGGAT014535.1	91.8	1.02	noncode	255	50	256	16	5	1	254	1301	1553	3e-95	351
MSTRG.19977.1	NONGGAT001769.2	92.59	0.96	noncode	255	50	243	16	2	5	247	931	1171	4e-94	348
MSTRG.19977.1	NONGGAT001769.2	92.59	0.96	noncode	255	50	243	16	2	5	247	931	1171	4e-94	348
MSTRG.19977.1	NONGGAT001309.2	91.63	1	noncode	255	50	251	17	3	2	251	3419	3172	5e-93	344
MSTRG.19977.1	NONGGAT001309.2	91.63	1	noncode	255	50	251	17	3	2	251	3419	3172	5e-93	344
MSTRG.19977.1	NONGGAT013979.1	90.55	1	noncode	255	50	254	23	1	2	255	1614	1866	3e-90	335
MSTRG.19977.1	NONGGAT013979.1	90.55	1	noncode	255	50	254	23	1	2	255	1614	1866	3e-90	335
MSTRG.19977.1	NONGGAT012594.1	90.08	0.99	noncode	255	50	252	23	1	1	252	974	725	2e-87	326
MSTRG.19977.1	NONGGAT009068.2	90.69	0.98	noncode	255	50	247	19	3	5	250	680	437	2e-87	326
MSTRG.19977.1	NONGGAT012594.1	90.08	0.99	noncode	255	50	252	23	1	1	252	974	725	2e-87	326
MSTRG.19977.1	NONGGAT009068.2	90.69	0.98	noncode	255	50	247	19	3	5	250	680	437	2e-87	326
MSTRG.19977.1	NONGGAT012967.1	91.45	0.92	noncode	255	50	234	20	0	22	255	41	274	3e-86	322
MSTRG.19977.1	NONGGAT012967.1	91.45	0.92	noncode	255	50	234	20	0	22	255	41	274	3e-86	322
MSTRG.19977.1	NONGGAT016668.1	91.74	0.9	noncode	255	50	230	19	0	22	251	322	93	9e-86	320
MSTRG.19977.1	NONGGAT016668.1	91.74	0.9	noncode	255	50	230	19	0	22	251	322	93	9e-86	320
MSTRG.19977.1	NONGGAT012962.1	89.56	0.98	noncode	255	50	249	26	0	2	250	3730	3482	1e-84	316
MSTRG.19977.1	NONGGAT012962.1	89.56	0.98	noncode	255	50	249	26	0	2	250	3730	3482	1e-84	316
MSTRG.19977.1	NONGGAT013049.1	92.49	0.84	noncode	255	50	213	15	1	44	255	1335	1123	9e-81	303
MSTRG.19977.1	NONGGAT013049.1	92.49	0.84	noncode	255	50	213	15	1	44	255	1335	1123	9e-81	303
MSTRG.19977.1	NONGGAT014506.1	88.07	0.96	noncode	255	50	243	26	2	1	243	1277	1038	3e-75	285
MSTRG.19977.1	NONGGAT014506.1	88.07	0.96	noncode	255	50	243	26	2	1	243	1277	1038	3e-75	285
MSTRG.42241.1	NONGGAT003062.2	100	0.81	noncode	366	50	298	0	0	69	366	712	1009	4e-155	551
MSTRG.42241.1	NONGGAT003062.2	100	0.81	noncode	366	50	298	0	0	69	366	712	1009	4e-155	551
MSTRG.42241.1	NONGGAT003063.2	99.02	0.84	noncode	366	50	306	2	1	61	366	25	329	6e-154	547
MSTRG.42241.1	NONGGAT003063.2	99.02	0.84	noncode	366	50	306	2	1	61	366	25	329	6e-154	547
MSTRG.69263.1	NONGGAT004828.2	99.89	1	noncode	892	50	891	0	1	2	892	109	998	0	1639
MSTRG.69263.1	NONGGAT004828.2	99.89	1	noncode	892	50	891	0	1	2	892	109	998	0	1639
MSTRG.47130.1	NONGGAT013298.1	88.68	0.99	noncode	218	50	212	19	4	5	215	1459	1666	8e-66	254
MSTRG.47130.1	NONGGAT013298.1	88.68	0.99	noncode	218	50	212	19	4	5	215	1459	1666	8e-66	254
MSTRG.47130.1	NONGGAT013529.1	86.29	0.91	noncode	218	50	197	23	1	20	216	655	463	5e-53	211
MSTRG.47130.1	NONGGAT013529.1	86.29	0.91	noncode	218	50	197	23	1	20	216	655	463	5e-53	211
MSTRG.47130.1	NONGGAT005793.2	82.24	1	noncode	218	50	214	31	5	4	215	3640	3432	5e-43	178
MSTRG.47130.1	NONGGAT005793.2	82.24	1	noncode	218	50	214	31	5	4	215	3640	3432	5e-43	178
MSTRG.144008.6	NONGGAT009736.2	86.48	0.92	noncode	476	50	429	49	9	1	424	8	432	3e-128	462
MSTRG.144008.6	NONGGAT009736.2	86.48	0.92	noncode	476	50	429	49	9	1	424	8	432	3e-128	462
MSTRG.129358.4	NONGGAT008309.2	100	0.92	noncode	1067	50	977	0	0	32	1008	1	977	0	1805
MSTRG.129358.4	NONGGAT008309.2	100	0.92	noncode	1067	50	977	0	0	32	1008	1	977	0	1805
MSTRG.47131.12	NONGGAT005793.2	81.12	0.86	noncode	502	50	429	73	6	77	502	3174	3597	2e-90	337
MSTRG.47131.12	NONGGAT005793.2	81.12	0.86	noncode	502	50	429	73	6	77	502	3174	3597	2e-90	337
MSTRG.41715.53	NONGGAT003016.2	94.03	0.99	noncode	409	50	402	16	4	1	401	740	346	1e-170	603
MSTRG.41715.53	NONGGAT003016.2	94.03	0.99	noncode	409	50	402	16	4	1	401	740	346	1e-170	603
MSTRG.65537.1	NONGGAT016647.1	92.95	1.01	noncode	296	50	298	19	1	1	296	554	851	1e-119	433
MSTRG.65537.1	NONGGAT016647.1	92.95	1.01	noncode	296	50	298	19	1	1	296	554	851	1e-119	433
MSTRG.65537.1	NONGGAT014535.1	93.1	0.99	noncode	296	50	290	16	4	8	296	1543	1257	3e-116	422
MSTRG.65537.1	NONGGAT014535.1	93.1	0.99	noncode	296	50	290	16	4	8	296	1543	1257	3e-116	422
MSTRG.65537.1	NONGGAT001309.2	92.2	1.01	noncode	296	50	295	19	3	3	296	3173	3464	5e-114	414
MSTRG.65537.1	NONGGAT001309.2	92.2	1.01	noncode	296	50	295	19	3	3	296	3173	3464	5e-114	414
MSTRG.65537.1	NONGGAT014020.1	92.15	1	noncode	296	50	293	21	2	3	295	1917	2207	2e-113	412
MSTRG.65537.1	NONGGAT012413.1	92.12	0.99	noncode	296	50	292	23	0	3	294	2319	2610	2e-113	412
MSTRG.65537.1	NONGGAT014020.1	92.15	1	noncode	296	50	293	21	2	3	295	1917	2207	2e-113	412
MSTRG.65537.1	NONGGAT012413.1	92.12	0.99	noncode	296	50	292	23	0	3	294	2319	2610	2e-113	412
MSTRG.65537.1	NONGGAT013012.1	93.04	0.92	noncode	296	50	273	19	0	2	274	2935	2663	1e-109	399
MSTRG.65537.1	NONGGAT013012.1	93.04	0.92	noncode	296	50	273	19	0	2	274	2935	2663	1e-109	399
MSTRG.65537.1	NONGGAT012594.1	91.16	1	noncode	296	50	294	24	1	3	296	727	1018	5e-109	398
MSTRG.65537.1	NONGGAT012594.1	91.16	1	noncode	296	50	294	24	1	3	296	727	1018	5e-109	398
MSTRG.65537.1	NONGGAT012962.1	90.51	1	noncode	296	50	295	28	0	2	296	3481	3775	8e-107	390
MSTRG.65537.1	NONGGAT012962.1	90.51	1	noncode	296	50	295	28	0	2	296	3481	3775	8e-107	390
MSTRG.65537.1	NONGGAT016648.1	95.08	0.82	noncode	296	50	244	12	0	53	296	328	571	4e-105	385
MSTRG.65537.1	NONGGAT016648.1	95.08	0.82	noncode	296	50	244	12	0	53	296	328	571	4e-105	385
MSTRG.65537.1	NONGGAT013979.1	91.4	0.95	noncode	296	50	279	23	1	3	281	1861	1584	5e-104	381
MSTRG.65537.1	NONGGAT013979.1	91.4	0.95	noncode	296	50	279	23	1	3	281	1861	1584	5e-104	381
MSTRG.65537.1	NONGGAT012006.2	88.44	1	noncode	296	50	294	33	1	3	296	1346	1054	1e-95	353
MSTRG.65537.1	NONGGAT012006.2	88.44	1	noncode	296	50	294	33	1	3	296	4969	4677	1e-95	353
MSTRG.65537.1	NONGGAT012006.2	88.44	1	noncode	296	50	294	33	1	3	296	8723	8431	1e-95	353
MSTRG.65537.1	NONGGAT012006.2	88.44	1	noncode	296	50	294	33	1	3	296	1346	1054	1e-95	353
MSTRG.65537.1	NONGGAT012006.2	88.44	1	noncode	296	50	294	33	1	3	296	4969	4677	1e-95	353
MSTRG.65537.1	NONGGAT012006.2	88.44	1	noncode	296	50	294	33	1	3	296	8723	8431	1e-95	353
MSTRG.65537.1	NONGGAT001769.2	91.77	0.83	noncode	296	50	243	18	2	6	248	1171	931	1e-90	337
MSTRG.65537.1	NONGGAT001769.2	91.77	0.83	noncode	296	50	243	18	2	6	248	1171	931	1e-90	337
MSTRG.65537.1	NONGGAT014506.1	88.89	0.92	noncode	296	50	270	27	2	10	279	1038	1304	2e-88	329
MSTRG.65537.1	NONGGAT014506.1	88.89	0.92	noncode	296	50	270	27	2	10	279	1038	1304	2e-88	329
MSTRG.65537.1	NONGGAT009068.2	88.71	0.85	noncode	296	50	248	24	3	2	248	436	680	1e-79	300
MSTRG.65537.1	NONGGAT009068.2	88.71	0.85	noncode	296	50	248	24	3	2	248	436	680	1e-79	300
MSTRG.66651.3	NONGGAT004651.2	100	0.86	noncode	1077	50	925	0	0	153	1077	1225	2149	0	1709
MSTRG.66651.3	NONGGAT004651.2	100	0.86	noncode	1077	50	925	0	0	153	1077	1225	2149	0	1709
MSTRG.10882.1	NONGGAT000697.2	97.4	1.01	noncode	917	50	924	0	1	18	917	4978	4055	0	1552
MSTRG.10882.1	NONGGAT000697.2	97.4	1.01	noncode	917	50	924	0	1	18	917	4978	4055	0	1552
MSTRG.47184.13	NONGGAT013298.1	88.85	1.02	noncode	303	50	305	28	4	1	303	1478	1778	1e-100	370
MSTRG.47184.13	NONGGAT013298.1	88.85	1.02	noncode	303	50	305	28	4	1	303	1478	1778	1e-100	370
MSTRG.47184.13	NONGGAT013529.1	85.57	1.02	noncode	303	50	305	37	4	1	303	651	352	2e-83	313
MSTRG.47184.13	NONGGAT013529.1	85.57	1.02	noncode	303	50	305	37	4	1	303	651	352	2e-83	313
MSTRG.47184.13	NONGGAT005793.2	84.72	1.01	noncode	303	50	301	39	5	5	303	3616	3321	7e-78	294
MSTRG.47184.13	NONGGAT005793.2	84.72	1.01	noncode	303	50	301	39	5	5	303	3616	3321	7e-78	294
MSTRG.70278.1	NONGGAT014020.1	94.69	1	noncode	208	50	207	11	0	2	208	2162	1956	2e-86	322
MSTRG.70278.1	NONGGAT014020.1	94.69	1	noncode	208	50	207	11	0	2	208	2162	1956	2e-86	322
MSTRG.70278.1	NONGGAT014535.1	95	0.97	noncode	208	50	200	8	2	10	208	1311	1509	1e-83	313
MSTRG.70278.1	NONGGAT014535.1	95	0.97	noncode	208	50	200	8	2	10	208	1311	1509	1e-83	313
MSTRG.70278.1	NONGGAT001769.2	91.13	0.99	noncode	208	50	203	15	3	2	203	930	1130	2e-71	272
MSTRG.70278.1	NONGGAT001769.2	91.13	0.99	noncode	208	50	203	15	3	2	203	930	1130	2e-71	272
MSTRG.70278.1	NONGGAT016647.1	89.47	1.01	noncode	208	50	209	20	2	2	208	805	597	1e-68	263
MSTRG.70278.1	NONGGAT016647.1	89.47	1.01	noncode	208	50	209	20	2	2	208	805	597	1e-68	263
MSTRG.70278.1	NONGGAT002514.2	89.42	1	noncode	208	50	208	21	1	2	208	170	377	5e-68	261
MSTRG.70278.1	NONGGAT002514.2	89.42	1	noncode	208	50	208	21	1	2	208	170	377	5e-68	261
MSTRG.70278.1	NONGGAT016648.1	89.71	0.99	noncode	208	50	204	19	2	2	203	525	322	2e-67	259
MSTRG.70278.1	NONGGAT016648.1	89.71	0.99	noncode	208	50	204	19	2	2	203	525	322	2e-67	259
MSTRG.70278.1	NONGGAT001309.2	91.05	0.92	noncode	208	50	190	16	1	2	190	3418	3229	2e-66	255
MSTRG.70278.1	NONGGAT001309.2	91.05	0.92	noncode	208	50	190	16	1	2	190	3418	3229	2e-66	255
MSTRG.70278.1	NONGGAT009068.2	89.27	1	noncode	208	50	205	18	2	6	208	678	476	8e-66	254
MSTRG.70278.1	NONGGAT009068.2	89.27	1	noncode	208	50	205	18	2	6	208	678	476	8e-66	254
MSTRG.70278.1	NONGGAT012967.1	91.3	0.9	noncode	208	50	184	12	4	23	203	43	225	4e-64	248
MSTRG.70278.1	NONGGAT012967.1	91.3	0.9	noncode	208	50	184	12	4	23	203	43	225	4e-64	248
MSTRG.70278.1	NONGGAT012413.1	88.29	1	noncode	208	50	205	22	2	1	203	2567	2363	5e-63	244
MSTRG.70278.1	NONGGAT012413.1	88.29	1	noncode	208	50	205	22	2	1	203	2567	2363	5e-63	244
MSTRG.70278.1	NONGGAT012594.1	88.89	0.96	noncode	208	50	198	20	2	2	197	972	775	2e-62	243
MSTRG.70278.1	NONGGAT012594.1	88.89	0.96	noncode	208	50	198	20	2	2	197	972	775	2e-62	243
MSTRG.70278.1	NONGGAT014506.1	89.89	0.91	noncode	208	50	188	17	1	2	189	1275	1090	6e-62	241
MSTRG.70278.1	NONGGAT014506.1	89.89	0.91	noncode	208	50	188	17	1	2	189	1275	1090	6e-62	241
MSTRG.70278.1	NONGGAT013012.1	88.32	0.96	noncode	208	50	197	21	2	2	196	2687	2883	3e-60	235
MSTRG.70278.1	NONGGAT013012.1	88.32	0.96	noncode	208	50	197	21	2	2	196	2687	2883	3e-60	235
MSTRG.70278.1	NONGGAT016668.1	89.27	0.86	noncode	208	50	177	17	2	23	197	320	144	8e-56	220
MSTRG.70278.1	NONGGAT016668.1	89.27	0.86	noncode	208	50	177	17	2	23	197	320	144	8e-56	220
MSTRG.70278.1	NONGGAT013049.1	89.35	0.82	noncode	208	50	169	15	3	43	208	1335	1167	2e-52	209
MSTRG.70278.1	NONGGAT013049.1	89.35	0.82	noncode	208	50	169	15	3	43	208	1335	1167	2e-52	209
MSTRG.70278.1	NONGGAT012962.1	84.21	1.01	noncode	208	50	209	31	2	2	208	3729	3521	3e-50	202
MSTRG.70278.1	NONGGAT012962.1	84.21	1.01	noncode	208	50	209	31	2	2	208	3729	3521	3e-50	202
MSTRG.66574.1	NONGGAT011462.2	98.43	0.81	noncode	393	50	319	5	0	69	387	1	319	2e-158	562
MSTRG.66574.1	NONGGAT011462.2	98.43	0.81	noncode	393	50	319	5	0	69	387	1	319	2e-158	562
MSTRG.144505.1	NONGGAT013042.1	95.54	1	noncode	202	50	202	9	0	1	202	121	322	5e-87	324
MSTRG.144505.1	NONGGAT012527.1	95.54	1	noncode	202	50	202	9	0	1	202	552	351	5e-87	324
MSTRG.144505.1	NONGGAT013042.1	95.54	1	noncode	202	50	202	9	0	1	202	121	322	5e-87	324
MSTRG.144505.1	NONGGAT012527.1	95.54	1	noncode	202	50	202	9	0	1	202	552	351	5e-87	324
MSTRG.144505.1	NONGGAT012481.1	92.12	1.01	noncode	202	50	203	14	2	1	202	692	893	3e-75	285
MSTRG.144505.1	NONGGAT012480.1	92.12	1.01	noncode	202	50	203	14	2	1	202	772	973	3e-75	285
MSTRG.144505.1	NONGGAT012481.1	92.12	1.01	noncode	202	50	203	14	2	1	202	692	893	3e-75	285
MSTRG.144505.1	NONGGAT012480.1	92.12	1.01	noncode	202	50	203	14	2	1	202	772	973	3e-75	285
MSTRG.144505.1	NONGGAT000259.2	92.08	1	noncode	202	50	202	15	1	1	202	275	75	9e-75	283
MSTRG.144505.1	NONGGAT000259.2	92.08	1	noncode	202	50	202	15	1	1	202	275	75	9e-75	283
MSTRG.144505.1	NONGGAT005571.2	91.94	0.92	noncode	202	50	186	15	0	17	202	1094	909	4e-68	261
MSTRG.144505.1	NONGGAT005569.2	91.94	0.92	noncode	202	50	186	15	0	17	202	1094	909	4e-68	261
MSTRG.144505.1	NONGGAT005571.2	91.94	0.92	noncode	202	50	186	15	0	17	202	1094	909	4e-68	261
MSTRG.144505.1	NONGGAT005569.2	91.94	0.92	noncode	202	50	186	15	0	17	202	1094	909	4e-68	261
MSTRG.144505.1	NONGGAT016565.1	92.26	0.84	noncode	202	50	168	12	1	13	180	239	405	7e-61	237
MSTRG.144505.1	NONGGAT016565.1	92.26	0.84	noncode	202	50	168	12	1	13	180	239	405	7e-61	237
MSTRG.63284.1	NONGGAT012413.1	95.65	0.99	noncode	232	50	230	10	0	1	230	2323	2552	8e-101	370
MSTRG.63284.1	NONGGAT012413.1	95.65	0.99	noncode	232	50	230	10	0	1	230	2323	2552	8e-101	370
MSTRG.63284.1	NONGGAT016647.1	95.58	0.97	noncode	232	50	226	10	0	7	232	568	793	1e-98	363
MSTRG.63284.1	NONGGAT016647.1	95.58	0.97	noncode	232	50	226	10	0	7	232	568	793	1e-98	363
MSTRG.63284.1	NONGGAT013012.1	93.97	1	noncode	232	50	232	14	0	1	232	2930	2699	3e-95	351
MSTRG.63284.1	NONGGAT001769.2	94.35	1	noncode	232	50	230	11	2	1	230	1170	943	3e-95	351
MSTRG.63284.1	NONGGAT013012.1	93.97	1	noncode	232	50	232	14	0	1	232	2930	2699	3e-95	351
MSTRG.63284.1	NONGGAT001769.2	94.35	1	noncode	232	50	230	11	2	1	230	1170	943	3e-95	351
MSTRG.63284.1	NONGGAT014020.1	93.1	1.01	noncode	232	50	232	14	2	1	232	1921	2150	2e-91	339
MSTRG.63284.1	NONGGAT014020.1	93.1	1.01	noncode	232	50	232	14	2	1	232	1921	2150	2e-91	339
MSTRG.63284.1	NONGGAT014535.1	92.64	1	noncode	232	50	231	15	2	2	232	1543	1315	4e-89	331
MSTRG.63284.1	NONGGAT014535.1	92.64	1	noncode	232	50	231	15	2	2	232	1543	1315	4e-89	331
MSTRG.63284.1	NONGGAT013979.1	92.24	1	noncode	232	50	232	17	1	1	232	1857	1627	5e-88	327
MSTRG.63284.1	NONGGAT012967.1	92.89	0.97	noncode	232	50	225	16	0	1	225	265	41	5e-88	327
MSTRG.63284.1	NONGGAT013979.1	92.24	1	noncode	232	50	232	17	1	1	232	1857	1627	5e-88	327
MSTRG.63284.1	NONGGAT012967.1	92.89	0.97	noncode	232	50	225	16	0	1	225	265	41	5e-88	327
MSTRG.63284.1	NONGGAT016648.1	96.41	0.84	noncode	232	50	195	7	0	38	232	319	513	2e-86	322
MSTRG.63284.1	NONGGAT014129.1	95.96	0.85	noncode	232	50	198	8	0	2	199	198	1	2e-86	322
MSTRG.63284.1	NONGGAT016648.1	96.41	0.84	noncode	232	50	195	7	0	38	232	319	513	2e-86	322
MSTRG.63284.1	NONGGAT014129.1	95.96	0.85	noncode	232	50	198	8	0	2	199	198	1	2e-86	322
MSTRG.63284.1	NONGGAT002514.2	92.34	0.96	noncode	232	50	222	16	1	11	232	402	182	4e-84	315
MSTRG.63284.1	NONGGAT002514.2	92.34	0.96	noncode	232	50	222	16	1	11	232	402	182	4e-84	315
MSTRG.63284.1	NONGGAT016668.1	91.56	0.97	noncode	232	50	225	19	0	1	225	98	322	5e-83	311
MSTRG.63284.1	NONGGAT001309.2	90.99	1.02	noncode	232	50	233	17	3	1	232	3177	3406	5e-83	311
MSTRG.63284.1	NONGGAT016668.1	91.56	0.97	noncode	232	50	225	19	0	1	225	98	322	5e-83	311
MSTRG.63284.1	NONGGAT001309.2	90.99	1.02	noncode	232	50	233	17	3	1	232	3177	3406	5e-83	311
MSTRG.63284.1	NONGGAT012006.2	90.52	1	noncode	232	50	232	22	0	1	232	1342	1111	6e-82	307
MSTRG.63284.1	NONGGAT012006.2	90.52	1	noncode	232	50	232	22	0	1	232	4965	4734	6e-82	307
MSTRG.63284.1	NONGGAT012006.2	90.52	1	noncode	232	50	232	22	0	1	232	8719	8488	6e-82	307
MSTRG.63284.1	NONGGAT012006.2	90.52	1	noncode	232	50	232	22	0	1	232	1342	1111	6e-82	307
MSTRG.63284.1	NONGGAT012006.2	90.52	1	noncode	232	50	232	22	0	1	232	4965	4734	6e-82	307
MSTRG.63284.1	NONGGAT012006.2	90.52	1	noncode	232	50	232	22	0	1	232	8719	8488	6e-82	307
MSTRG.63284.1	NONGGAT012594.1	90.6	1.03	noncode	232	50	234	16	4	1	232	731	960	2e-81	305
MSTRG.63284.1	NONGGAT012594.1	90.6	1.03	noncode	232	50	234	16	4	1	232	731	960	2e-81	305
MSTRG.63284.1	NONGGAT014911.1	93.5	0.86	noncode	232	50	200	13	0	1	200	1969	2168	4e-79	298
MSTRG.63284.1	NONGGAT013049.1	93.14	0.88	noncode	232	50	204	13	1	1	203	1132	1335	4e-79	298
MSTRG.63284.1	NONGGAT014911.1	93.5	0.86	noncode	232	50	200	13	0	1	200	1969	2168	4e-79	298
MSTRG.63284.1	NONGGAT013049.1	93.14	0.88	noncode	232	50	204	13	1	1	203	1132	1335	4e-79	298
MSTRG.63284.1	NONGGAT009068.2	90.04	1.01	noncode	232	50	231	19	3	1	230	441	668	1e-78	296
MSTRG.63284.1	NONGGAT009068.2	90.04	1.01	noncode	232	50	231	19	3	1	230	441	668	1e-78	296
MSTRG.63284.1	NONGGAT012962.1	89.52	0.99	noncode	232	50	229	24	0	1	229	3486	3714	7e-77	291
MSTRG.63284.1	NONGGAT012962.1	89.52	0.99	noncode	232	50	229	24	0	1	229	3486	3714	7e-77	291
MSTRG.63284.1	NONGGAT016115.1	91.96	0.86	noncode	232	50	199	15	1	7	204	368	170	5e-73	278
MSTRG.63284.1	NONGGAT016115.1	91.96	0.86	noncode	232	50	199	15	1	7	204	368	170	5e-73	278
MSTRG.63284.1	NONGGAT014506.1	88.65	1	noncode	232	50	229	23	2	4	232	1038	1263	2e-72	276
MSTRG.63284.1	NONGGAT014506.1	88.65	1	noncode	232	50	229	23	2	4	232	1038	1263	2e-72	276
MSTRG.63284.1	NONGGAT003141.2	91.84	0.86	noncode	232	50	196	12	4	1	195	273	81	8e-71	270
MSTRG.63284.1	NONGGAT003140.2	91.84	0.86	noncode	232	50	196	12	4	1	195	273	81	8e-71	270
MSTRG.63284.1	NONGGAT003139.2	91.84	0.86	noncode	232	50	196	12	4	1	195	273	81	8e-71	270
MSTRG.63284.1	NONGGAT003141.2	91.84	0.86	noncode	232	50	196	12	4	1	195	273	81	8e-71	270
MSTRG.63284.1	NONGGAT003140.2	91.84	0.86	noncode	232	50	196	12	4	1	195	273	81	8e-71	270
MSTRG.63284.1	NONGGAT003139.2	91.84	0.86	noncode	232	50	196	12	4	1	195	273	81	8e-71	270
MSTRG.63284.1	NONGGAT012447.1	88.36	0.81	noncode	232	50	189	22	0	9	197	83	271	5e-58	228
MSTRG.63284.1	NONGGAT012447.1	88.36	0.81	noncode	232	50	189	22	0	9	197	83	271	5e-58	228
MSTRG.20043.1	NONGGAT013042.1	95.44	0.97	noncode	249	50	241	11	0	1	241	87	327	3e-105	385
MSTRG.20043.1	NONGGAT012527.1	95.44	0.97	noncode	249	50	241	11	0	1	241	586	346	3e-105	385
MSTRG.20043.1	NONGGAT013042.1	95.44	0.97	noncode	249	50	241	11	0	1	241	87	327	3e-105	385
MSTRG.20043.1	NONGGAT012527.1	95.44	0.97	noncode	249	50	241	11	0	1	241	586	346	3e-105	385
MSTRG.20043.1	NONGGAT012481.1	93.78	0.97	noncode	249	50	241	14	1	10	249	666	906	5e-98	361
MSTRG.20043.1	NONGGAT012480.1	93.78	0.97	noncode	249	50	241	14	1	10	249	746	986	5e-98	361
MSTRG.20043.1	NONGGAT012481.1	93.78	0.97	noncode	249	50	241	14	1	10	249	666	906	5e-98	361
MSTRG.20043.1	NONGGAT012480.1	93.78	0.97	noncode	249	50	241	14	1	10	249	746	986	5e-98	361
MSTRG.20043.1	NONGGAT000259.2	91.87	0.99	noncode	249	50	246	19	1	4	249	306	62	2e-92	342
MSTRG.20043.1	NONGGAT000259.2	91.87	0.99	noncode	249	50	246	19	1	4	249	306	62	2e-92	342
MSTRG.45158.7	NONGGAT011180.2	98.82	1.01	noncode	1676	50	1696	0	1	1	1676	833	2528	0	3003
MSTRG.45158.7	NONGGAT011180.2	98.82	1.01	noncode	1676	50	1696	0	1	1	1676	833	2528	0	3003
MSTRG.45158.7	NONGGAT011178.2	96.71	0.91	noncode	1676	50	1519	28	3	179	1676	1793	276	0	2508
MSTRG.45158.7	NONGGAT011178.2	96.71	0.91	noncode	1676	50	1519	28	3	179	1676	1793	276	0	2508
MSTRG.45158.7	NONGGAT011179.2	95.57	0.94	noncode	1676	50	1558	17	10	1	1522	146	1687	0	2447
MSTRG.45158.7	NONGGAT011179.2	95.57	0.94	noncode	1676	50	1558	17	10	1	1522	146	1687	0	2447
MSTRG.41716.14	NONGGAT003016.2	96.41	0.9	noncode	866	50	781	22	3	21	800	1	776	0	1282
MSTRG.41716.14	NONGGAT003016.2	96.41	0.9	noncode	866	50	781	22	3	21	800	1	776	0	1282
MSTRG.66525.2	NONGGAT010552.2	93.21	1.01	noncode	576	50	574	32	7	4	573	781	211	0	837
MSTRG.66525.2	NONGGAT010552.2	93.21	1.01	noncode	576	50	574	32	7	4	573	781	211	0	837
MSTRG.66525.2	NONGGAT009663.2	92.96	0.97	noncode	576	50	554	33	6	23	573	740	190	0	802
MSTRG.66525.2	NONGGAT009663.2	92.96	0.97	noncode	576	50	554	33	6	23	573	740	190	0	802
MSTRG.106491.1	NONGGAT006969.2	100	0.97	noncode	644	50	623	0	0	22	644	1	623	0	1151
MSTRG.106491.1	NONGGAT006969.2	100	0.97	noncode	644	50	623	0	0	22	644	1	623	0	1151
MSTRG.63865.1	NONGGAT012480.1	91.97	1.01	noncode	359	50	361	27	1	1	359	758	1118	3e-141	505
MSTRG.63865.1	NONGGAT012480.1	91.97	1.01	noncode	359	50	361	27	1	1	359	758	1118	3e-141	505
MSTRG.63865.1	NONGGAT001188.2	95.58	0.82	noncode	359	50	294	13	0	66	359	523	230	3e-131	472
MSTRG.63865.1	NONGGAT001188.2	95.58	0.82	noncode	359	50	294	13	0	66	359	523	230	3e-131	472
MSTRG.63865.1	NONGGAT005571.2	91.79	0.92	noncode	359	50	329	23	2	31	359	1094	770	4e-126	455
MSTRG.63865.1	NONGGAT005569.2	91.79	0.92	noncode	359	50	329	23	2	31	359	1094	770	4e-126	455
MSTRG.63865.1	NONGGAT005571.2	91.79	0.92	noncode	359	50	329	23	2	31	359	1094	770	4e-126	455
MSTRG.63865.1	NONGGAT005569.2	91.79	0.92	noncode	359	50	329	23	2	31	359	1094	770	4e-126	455
MSTRG.63865.1	NONGGAT012481.1	91.8	0.85	noncode	359	50	305	25	0	1	305	678	982	3e-117	425
MSTRG.63865.1	NONGGAT012481.1	91.8	0.85	noncode	359	50	305	25	0	1	305	678	982	3e-117	425
MSTRG.63865.1	NONGGAT001424.2	81.57	0.83	noncode	359	50	293	45	8	66	351	515	225	2e-59	233
MSTRG.63865.1	NONGGAT001423.2	81.57	0.83	noncode	359	50	293	45	8	66	351	653	363	2e-59	233
MSTRG.63865.1	NONGGAT001424.2	81.57	0.83	noncode	359	50	293	45	8	66	351	515	225	2e-59	233
MSTRG.63865.1	NONGGAT001423.2	81.57	0.83	noncode	359	50	293	45	8	66	351	653	363	2e-59	233
MSTRG.63865.1	NONGGAT012964.1	80.67	0.85	noncode	359	50	300	51	7	50	346	681	386	3e-57	226
MSTRG.63865.1	NONGGAT012964.1	80.67	0.85	noncode	359	50	300	51	7	50	346	681	386	3e-57	226
MSTRG.1890.2	NONGGAT000166.2	100	0.83	noncode	341	50	284	0	0	58	341	102	385	2e-147	525
MSTRG.1890.2	NONGGAT000165.2	100	0.83	noncode	341	50	284	0	0	58	341	268	551	2e-147	525
MSTRG.1890.2	NONGGAT000166.2	100	0.83	noncode	341	50	284	0	0	58	341	102	385	2e-147	525
MSTRG.1890.2	NONGGAT000165.2	100	0.83	noncode	341	50	284	0	0	58	341	268	551	2e-147	525
MSTRG.72189.1	NONGGAT005173.2	100	1	noncode	379	50	379	0	0	1	379	241	619	0	701
MSTRG.72189.1	NONGGAT005173.2	100	1	noncode	379	50	379	0	0	1	379	241	619	0	701
MSTRG.109039.18	NONGGAT007109.2	100	0.82	noncode	2170	50	1781	0	0	335	2115	449	2229	0	3290
MSTRG.109039.18	NONGGAT007109.2	100	0.82	noncode	2170	50	1781	0	0	335	2115	449	2229	0	3290
MSTRG.109039.18	NONGGAT007108.2	99.55	0.82	noncode	2170	50	1789	0	1	335	2115	449	2237	0	3253
MSTRG.109039.18	NONGGAT007108.2	99.55	0.82	noncode	2170	50	1789	0	1	335	2115	449	2237	0	3253
MSTRG.70601.5	NONGGAT004996.2	100	0.85	noncode	1315	50	1115	0	0	1	1115	2429	3543	0	2060
MSTRG.70601.5	NONGGAT004996.2	100	0.85	noncode	1315	50	1115	0	0	1	1115	2429	3543	0	2060
MSTRG.70601.5	NONGGAT004997.2	100	0.84	noncode	1315	50	1104	0	0	1	1104	2604	3707	0	2039
MSTRG.70601.5	NONGGAT004997.2	100	0.84	noncode	1315	50	1104	0	0	1	1104	2604	3707	0	2039
MSTRG.123422.1	NONGGAT014020.1	95.18	1	noncode	249	50	249	12	0	1	249	1948	2196	5e-108	394
MSTRG.123422.1	NONGGAT014020.1	95.18	1	noncode	249	50	249	12	0	1	249	1948	2196	5e-108	394
MSTRG.123422.1	NONGGAT014535.1	93.98	1	noncode	249	50	249	15	0	1	249	1517	1269	5e-103	377
MSTRG.123422.1	NONGGAT014535.1	93.98	1	noncode	249	50	249	15	0	1	249	1517	1269	5e-103	377
MSTRG.123422.1	NONGGAT001309.2	92.31	1.01	noncode	249	50	247	15	4	6	249	3207	3452	4e-94	348
MSTRG.123422.1	NONGGAT001309.2	92.31	1.01	noncode	249	50	247	15	4	6	249	3207	3452	4e-94	348
MSTRG.123422.1	NONGGAT016647.1	92.18	0.98	noncode	249	50	243	17	2	6	246	594	836	2e-92	342
MSTRG.123422.1	NONGGAT016647.1	92.18	0.98	noncode	249	50	243	17	2	6	246	594	836	2e-92	342
MSTRG.123422.1	NONGGAT002514.2	91.2	1.01	noncode	249	50	250	21	1	1	249	385	136	2e-91	339
MSTRG.123422.1	NONGGAT002514.2	91.2	1.01	noncode	249	50	250	21	1	1	249	385	136	2e-91	339
MSTRG.123422.1	NONGGAT016648.1	92.34	0.95	noncode	249	50	235	16	2	14	246	322	556	1e-89	333
MSTRG.123422.1	NONGGAT016648.1	92.34	0.95	noncode	249	50	235	16	2	14	246	322	556	1e-89	333
MSTRG.123422.1	NONGGAT014506.1	93.01	0.93	noncode	249	50	229	13	2	14	241	1075	1301	4e-89	331
MSTRG.123422.1	NONGGAT014506.1	93.01	0.93	noncode	249	50	229	13	2	14	241	1075	1301	4e-89	331
MSTRG.123422.1	NONGGAT012594.1	91.63	0.98	noncode	249	50	239	16	4	14	249	769	1006	5e-88	327
MSTRG.123422.1	NONGGAT012594.1	91.63	0.98	noncode	249	50	239	16	4	14	249	769	1006	5e-88	327
MSTRG.123422.1	NONGGAT013012.1	90.04	0.98	noncode	249	50	241	22	2	1	239	2903	2663	5e-83	311
MSTRG.123422.1	NONGGAT013012.1	90.04	0.98	noncode	249	50	241	22	2	1	239	2903	2663	5e-83	311
MSTRG.123422.1	NONGGAT012413.1	89.92	0.96	noncode	249	50	238	22	2	14	249	2363	2600	3e-81	305
MSTRG.123422.1	NONGGAT001769.2	92.52	0.87	noncode	249	50	214	14	2	1	213	1143	931	3e-81	305
MSTRG.123422.1	NONGGAT012413.1	89.92	0.96	noncode	249	50	238	22	2	14	249	2363	2600	3e-81	305
MSTRG.123422.1	NONGGAT001769.2	92.52	0.87	noncode	249	50	214	14	2	1	213	1143	931	3e-81	305
MSTRG.123422.1	NONGGAT012962.1	88.05	1.02	noncode	249	50	251	28	2	1	249	3513	3763	2e-78	296
MSTRG.123422.1	NONGGAT012962.1	88.05	1.02	noncode	249	50	251	28	2	1	249	3513	3763	2e-78	296
MSTRG.123422.1	NONGGAT013979.1	88.99	0.92	noncode	249	50	227	24	1	21	246	1810	1584	2e-73	279
MSTRG.123422.1	NONGGAT013979.1	88.99	0.92	noncode	249	50	227	24	1	21	246	1810	1584	2e-73	279
MSTRG.123422.1	NONGGAT009068.2	90.23	0.87	noncode	249	50	215	17	2	1	213	468	680	5e-73	278
MSTRG.123422.1	NONGGAT009068.2	90.23	0.87	noncode	249	50	215	17	2	1	213	468	680	5e-73	278
MSTRG.123422.1	NONGGAT012967.1	90.95	0.81	noncode	249	50	199	14	4	1	196	238	41	4e-69	265
MSTRG.123422.1	NONGGAT012967.1	90.95	0.81	noncode	249	50	199	14	4	1	196	238	41	4e-69	265
MSTRG.113768.2	NONGGAT011287.2	89.47	1.03	noncode	209	50	209	5	7	1	209	283	92	4e-64	248
MSTRG.113768.2	NONGGAT011287.2	89.47	1.03	noncode	209	50	209	5	7	1	209	283	92	4e-64	248
MSTRG.154032.2	NONGGAT011498.2	96.76	0.86	noncode	467	50	401	13	0	67	467	1660	1260	0	669
MSTRG.154032.2	NONGGAT011498.2	96.76	0.86	noncode	467	50	401	13	0	67	467	1660	1260	0	669
MSTRG.41716.24	NONGGAT003015.2	100	0.93	noncode	277	50	258	0	0	1	258	33	290	6e-133	477
MSTRG.41716.24	NONGGAT003015.2	100	0.93	noncode	277	50	258	0	0	1	258	33	290	6e-133	477
MSTRG.135348.2	NONGGAT008736.2	100	0.99	noncode	302	50	298	0	0	5	302	478	775	4e-155	551
MSTRG.135348.2	NONGGAT008736.2	100	0.99	noncode	302	50	298	0	0	5	302	478	775	4e-155	551
MSTRG.6759.1	NONGGAT000451.2	100	0.84	noncode	1045	50	874	0	0	1	874	166	1039	0	1615
MSTRG.6759.1	NONGGAT000451.2	100	0.84	noncode	1045	50	874	0	0	1	874	166	1039	0	1615
MSTRG.41716.56	NONGGAT003016.2	91.04	0.96	noncode	818	50	781	65	2	36	816	1	776	0	1050
MSTRG.41716.56	NONGGAT003016.2	91.04	0.96	noncode	818	50	781	65	2	36	816	1	776	0	1050
MSTRG.89800.1	NONGGAT006276.2	99.86	0.88	noncode	1664	50	1470	2	0	1	1470	636	2105	0	2704
MSTRG.89800.1	NONGGAT006276.2	99.86	0.88	noncode	1664	50	1470	2	0	1	1470	636	2105	0	2704
MSTRG.41646.8	NONRATT031966.1	97.88	1.01	noncode	751	50	755	10	4	3	751	1769	1015	0	1301
MSTRG.41646.8	NONRATT031966.1	97.88	1.01	noncode	751	50	755	10	4	3	751	1769	1015	0	1301
MSTRG.41646.8	NONHSAT222441.1	97.75	1.01	noncode	751	50	755	11	4	3	751	1766	1012	0	1295
MSTRG.41646.8	NONHSAT193358.1	97.75	1.01	noncode	751	50	755	11	4	3	751	1766	1012	0	1295
MSTRG.41646.8	NONHSAT193357.1	97.75	1.01	noncode	751	50	755	11	4	3	751	5424	4670	0	1295
MSTRG.41646.8	NONHSAT190640.1	97.75	1.01	noncode	751	50	755	11	4	3	751	1766	1012	0	1295
MSTRG.41646.8	NONHSAT190639.1	97.75	1.01	noncode	751	50	755	11	4	3	751	1766	1012	0	1295
MSTRG.41646.8	NONHSAT190635.1	97.75	1.01	noncode	751	50	755	11	4	3	751	1766	1012	0	1295
MSTRG.41646.8	NONHSAT135873.2	97.75	1.01	noncode	751	50	755	11	4	3	751	5420	4666	0	1295
MSTRG.41646.8	NONHSAT222441.1	97.75	1.01	noncode	751	50	755	11	4	3	751	1766	1012	0	1295
MSTRG.41646.8	NONHSAT193358.1	97.75	1.01	noncode	751	50	755	11	4	3	751	1766	1012	0	1295
MSTRG.41646.8	NONHSAT193357.1	97.75	1.01	noncode	751	50	755	11	4	3	751	5424	4670	0	1295
MSTRG.41646.8	NONHSAT190640.1	97.75	1.01	noncode	751	50	755	11	4	3	751	1766	1012	0	1295
MSTRG.41646.8	NONHSAT190639.1	97.75	1.01	noncode	751	50	755	11	4	3	751	1766	1012	0	1295
MSTRG.41646.8	NONHSAT190635.1	97.75	1.01	noncode	751	50	755	11	4	3	751	1766	1012	0	1295
MSTRG.41646.8	NONHSAT135873.2	97.75	1.01	noncode	751	50	755	11	4	3	751	5420	4666	0	1295
MSTRG.41646.8	NONBTAT029806.1	97.75	1.01	noncode	751	50	756	10	5	3	751	1767	1012	0	1295
MSTRG.41646.8	NONBTAT015719.2	97.75	1.01	noncode	751	50	756	10	5	3	751	1767	1012	0	1295
MSTRG.41646.8	NONBTAT015718.2	97.75	1.01	noncode	751	50	756	10	5	3	751	1767	1012	0	1295
MSTRG.41646.8	NONBTAT015717.2	97.75	1.01	noncode	751	50	756	10	5	3	751	1767	1012	0	1295
MSTRG.41646.8	NONBTAT029806.1	97.75	1.01	noncode	751	50	756	10	5	3	751	1767	1012	0	1295
MSTRG.41646.8	NONBTAT015719.2	97.75	1.01	noncode	751	50	756	10	5	3	751	1767	1012	0	1295
MSTRG.41646.8	NONBTAT015718.2	97.75	1.01	noncode	751	50	756	10	5	3	751	1767	1012	0	1295
MSTRG.41646.8	NONBTAT015717.2	97.75	1.01	noncode	751	50	756	10	5	3	751	1767	1012	0	1295
MSTRG.41646.8	NONMMUT029642.2	97.14	0.98	noncode	751	50	733	15	4	25	751	5107	4375	0	1232
MSTRG.41646.8	NONMMUT029642.2	97.14	0.98	noncode	751	50	733	15	4	25	751	5107	4375	0	1232
MSTRG.41646.8	NONMMUT029667.2	97.24	0.92	noncode	751	50	689	13	4	69	751	1701	1013	0	1162
MSTRG.41646.8	NONMMUT029667.2	97.24	0.92	noncode	751	50	689	13	4	69	751	1701	1013	0	1162
MSTRG.41646.8	NONHSAT191165.1	97.89	0.89	noncode	751	50	665	9	3	92	751	1	665	0	1146
MSTRG.41646.8	NONHSAT191164.1	97.89	0.89	noncode	751	50	665	9	3	92	751	1	665	0	1146
MSTRG.41646.8	NONHSAT191162.1	97.89	0.89	noncode	751	50	665	9	3	92	751	1	665	0	1146
MSTRG.41646.8	NONHSAT191165.1	97.89	0.89	noncode	751	50	665	9	3	92	751	1	665	0	1146
MSTRG.41646.8	NONHSAT191164.1	97.89	0.89	noncode	751	50	665	9	3	92	751	1	665	0	1146
MSTRG.41646.8	NONHSAT191162.1	97.89	0.89	noncode	751	50	665	9	3	92	751	1	665	0	1146
MSTRG.41646.8	NONMMUT102084.1	97.29	0.89	noncode	751	50	665	13	3	92	751	1	665	0	1123
MSTRG.41646.8	NONHSAT191163.1	97.3	0.89	noncode	751	50	666	11	4	92	751	1	665	0	1123
MSTRG.41646.8	NONMMUT102084.1	97.29	0.89	noncode	751	50	665	13	3	92	751	1	665	0	1123
MSTRG.41646.8	NONHSAT191163.1	97.3	0.89	noncode	751	50	666	11	4	92	751	1	665	0	1123
MSTRG.41646.8	NONCELT001394.2	83.57	0.95	noncode	751	50	700	95	15	57	751	1604	920	0	638
MSTRG.41646.8	NONCELT001387.2	83.57	0.95	noncode	751	50	700	95	15	57	751	1604	920	0	638
MSTRG.41646.8	NONCELT001394.2	83.57	0.95	noncode	751	50	700	95	15	57	751	1604	920	0	638
MSTRG.41646.8	NONCELT001387.2	83.57	0.95	noncode	751	50	700	95	15	57	751	1604	920	0	638
MSTRG.41646.8	NONATHG002169.1	82.23	1.02	noncode	751	1808	743	109	23	21	751	1690	959	3e-175	619
MSTRG.41646.8	NONATHG002169.1	82.23	1.02	noncode	751	1808	743	109	23	21	751	1690	959	3e-175	619
MSTRG.41646.8	NONATHG000930.1	82.1	1.02	noncode	751	1808	743	110	23	21	751	1690	959	1e-173	614
MSTRG.41646.8	NONATHG000930.1	82.1	1.02	noncode	751	1808	743	110	23	21	751	1690	959	1e-173	614
MSTRG.41646.8	NONSCET000298.2	81.95	1	noncode	751	50	737	114	16	22	749	1683	957	2e-171	606
MSTRG.41646.8	NONSCET000293.2	81.95	1	noncode	751	50	737	114	16	22	749	1683	957	2e-171	606
MSTRG.41646.8	NONSCET000298.2	81.95	1	noncode	751	50	737	114	16	22	749	1683	957	2e-171	606
MSTRG.41646.8	NONSCET000293.2	81.95	1	noncode	751	50	737	114	16	22	749	1683	957	2e-171	606
MSTRG.35946.1	NONGGAT002467.2	100	0.84	noncode	1360	50	1148	0	0	7	1154	1	1148	0	2121
MSTRG.35946.1	NONGGAT002467.2	100	0.84	noncode	1360	50	1148	0	0	7	1154	1	1148	0	2121
MSTRG.123417.1	NONGGAT014020.1	97.55	0.98	noncode	209	50	204	5	0	2	205	1942	2145	9e-95	350
MSTRG.123417.1	NONGGAT014020.1	97.55	0.98	noncode	209	50	204	5	0	2	205	1942	2145	9e-95	350
MSTRG.123417.1	NONGGAT014535.1	95.73	1.02	noncode	209	50	211	6	3	1	209	1524	1315	7e-91	337
MSTRG.123417.1	NONGGAT014535.1	95.73	1.02	noncode	209	50	211	6	3	1	209	1524	1315	7e-91	337
MSTRG.123417.1	NONGGAT001769.2	92.72	1	noncode	209	50	206	13	2	1	205	1150	946	1e-78	296
MSTRG.123417.1	NONGGAT001769.2	92.72	1	noncode	209	50	206	13	2	1	205	1150	946	1e-78	296
MSTRG.123417.1	NONGGAT002514.2	91	1.02	noncode	209	50	211	17	2	1	209	392	182	1e-74	283
MSTRG.123417.1	NONGGAT002514.2	91	1.02	noncode	209	50	211	17	2	1	209	392	182	1e-74	283
MSTRG.123417.1	NONGGAT016647.1	90.57	1.03	noncode	209	50	212	17	3	1	209	582	793	4e-73	278
MSTRG.123417.1	NONGGAT012967.1	91.26	1	noncode	209	50	206	14	4	1	203	245	41	4e-73	278
MSTRG.123417.1	NONGGAT016647.1	90.57	1.03	noncode	209	50	212	17	3	1	209	582	793	4e-73	278
MSTRG.123417.1	NONGGAT012967.1	91.26	1	noncode	209	50	206	14	4	1	203	245	41	4e-73	278
MSTRG.123417.1	NONGGAT009068.2	90.78	1	noncode	209	50	206	15	2	1	204	461	664	2e-71	272
MSTRG.123417.1	NONGGAT001309.2	90.09	1.03	noncode	209	50	212	18	3	1	209	3195	3406	2e-71	272
MSTRG.123417.1	NONGGAT009068.2	90.78	1	noncode	209	50	206	15	2	1	204	461	664	2e-71	272
MSTRG.123417.1	NONGGAT001309.2	90.09	1.03	noncode	209	50	212	18	3	1	209	3195	3406	2e-71	272
MSTRG.123417.1	NONGGAT013012.1	89.76	0.99	noncode	209	50	205	19	2	3	205	2908	2704	5e-68	261
MSTRG.123417.1	NONGGAT013012.1	89.76	0.99	noncode	209	50	205	19	2	3	205	2908	2704	5e-68	261
MSTRG.123417.1	NONGGAT016668.1	89.71	0.99	noncode	209	50	204	19	2	2	203	119	322	2e-67	259
MSTRG.123417.1	NONGGAT014129.1	93.22	0.86	noncode	209	50	177	10	2	3	177	177	1	2e-67	259
MSTRG.123417.1	NONGGAT012413.1	89.37	1	noncode	209	50	207	20	2	1	205	2343	2549	2e-67	259
MSTRG.123417.1	NONGGAT016668.1	89.71	0.99	noncode	209	50	204	19	2	2	203	119	322	2e-67	259
MSTRG.123417.1	NONGGAT014129.1	93.22	0.86	noncode	209	50	177	10	2	3	177	177	1	2e-67	259
MSTRG.123417.1	NONGGAT012413.1	89.37	1	noncode	209	50	207	20	2	1	205	2343	2549	2e-67	259
MSTRG.123417.1	NONGGAT016648.1	91.15	0.93	noncode	209	50	192	14	3	21	209	322	513	6e-67	257
MSTRG.123417.1	NONGGAT016648.1	91.15	0.93	noncode	209	50	192	14	3	21	209	322	513	6e-67	257
MSTRG.123417.1	NONGGAT012594.1	88.68	1.03	noncode	209	50	212	21	3	1	209	749	960	2e-66	255
MSTRG.123417.1	NONGGAT012594.1	88.68	1.03	noncode	209	50	212	21	3	1	209	749	960	2e-66	255
MSTRG.123417.1	NONGGAT014911.1	91.11	0.87	noncode	209	50	180	14	2	1	178	1989	2168	2e-62	243
MSTRG.123417.1	NONGGAT014911.1	91.11	0.87	noncode	209	50	180	14	2	1	178	1989	2168	2e-62	243
MSTRG.123417.1	NONGGAT016115.1	90.27	0.9	noncode	209	50	185	15	3	1	182	354	170	2e-61	239
MSTRG.123417.1	NONGGAT014506.1	91.48	0.85	noncode	209	50	176	12	2	35	209	1090	1263	2e-61	239
MSTRG.123417.1	NONGGAT016115.1	90.27	0.9	noncode	209	50	185	15	3	1	182	354	170	2e-61	239
MSTRG.123417.1	NONGGAT014506.1	91.48	0.85	noncode	209	50	176	12	2	35	209	1090	1263	2e-61	239
MSTRG.123417.1	NONGGAT013049.1	90.22	0.89	noncode	209	50	184	15	3	1	181	1152	1335	8e-61	237
MSTRG.123417.1	NONGGAT013049.1	90.22	0.89	noncode	209	50	184	15	3	1	181	1152	1335	8e-61	237
MSTRG.123417.1	NONGGAT012962.1	86.96	1	noncode	209	50	207	25	2	1	205	3506	3712	4e-59	231
MSTRG.123417.1	NONGGAT012962.1	86.96	1	noncode	209	50	207	25	2	1	205	3506	3712	4e-59	231
MSTRG.114886.1	NONGGAT001188.2	95.65	1	noncode	299	50	299	12	1	1	298	393	95	2e-133	479
MSTRG.114886.1	NONGGAT001188.2	95.65	1	noncode	299	50	299	12	1	1	298	393	95	2e-133	479
MSTRG.114886.1	NONGGAT014780.1	96.24	0.89	noncode	299	50	266	10	0	1	266	899	634	1e-120	436
MSTRG.114886.1	NONGGAT014780.1	96.24	0.89	noncode	299	50	266	10	0	1	266	899	634	1e-120	436
MSTRG.114886.1	NONGGAT012480.1	92.69	1.01	noncode	299	50	301	20	1	1	299	953	1253	1e-119	433
MSTRG.114886.1	NONGGAT012480.1	92.69	1.01	noncode	299	50	301	20	1	1	299	953	1253	1e-119	433
MSTRG.114886.1	NONGGAT005571.2	92.1	0.98	noncode	299	50	291	19	2	1	291	929	643	8e-112	407
MSTRG.114886.1	NONGGAT005569.2	92.1	0.98	noncode	299	50	291	19	2	1	291	929	643	8e-112	407
MSTRG.114886.1	NONGGAT005571.2	92.1	0.98	noncode	299	50	291	19	2	1	291	929	643	8e-112	407
MSTRG.114886.1	NONGGAT005569.2	92.1	0.98	noncode	299	50	291	19	2	1	291	929	643	8e-112	407
MSTRG.17461.6	NONGGAT001131.2	100	0.85	noncode	2193	50	1854	0	0	304	2157	131	1984	0	3424
MSTRG.17461.6	NONGGAT001131.2	100	0.85	noncode	2193	50	1854	0	0	304	2157	131	1984	0	3424
MSTRG.129617.1	NONGGAT008350.2	100	1	noncode	277	50	277	0	0	1	277	70	346	2e-143	512
MSTRG.129617.1	NONGGAT008350.2	100	1	noncode	277	50	277	0	0	1	277	70	346	2e-143	512
MSTRG.144459.1	NONGGAT012493.1	94.15	0.83	noncode	229	50	188	8	3	42	229	1195	1379	1e-74	283
MSTRG.144459.1	NONGGAT012493.1	94.15	0.83	noncode	229	50	188	8	3	42	229	1195	1379	1e-74	283
MSTRG.154030.1	NONGGAT010552.2	89.93	1.02	noncode	436	50	437	38	6	1	434	850	417	3e-157	558
MSTRG.154030.1	NONGGAT010552.2	89.93	1.02	noncode	436	50	437	38	6	1	434	850	417	3e-157	558
MSTRG.154030.1	NONGGAT009663.2	86.73	1.05	noncode	436	50	452	39	7	1	434	843	395	2e-134	483
MSTRG.154030.1	NONGGAT009663.2	86.73	1.05	noncode	436	50	452	39	7	1	434	843	395	2e-134	483
MSTRG.41646.7	NONRATT031966.1	97.2	1.03	noncode	737	50	750	8	6	1	737	1744	995	0	1256
MSTRG.41646.7	NONRATT031966.1	97.2	1.03	noncode	737	50	750	8	6	1	737	1744	995	0	1256
MSTRG.41646.7	NONBTAT029806.1	97.07	1.03	noncode	737	50	751	8	7	1	737	1742	992	0	1253
MSTRG.41646.7	NONBTAT015719.2	97.07	1.03	noncode	737	50	751	8	7	1	737	1742	992	0	1253
MSTRG.41646.7	NONBTAT015718.2	97.07	1.03	noncode	737	50	751	8	7	1	737	1742	992	0	1253
MSTRG.41646.7	NONBTAT015717.2	97.07	1.03	noncode	737	50	751	8	7	1	737	1742	992	0	1253
MSTRG.41646.7	NONBTAT029806.1	97.07	1.03	noncode	737	50	751	8	7	1	737	1742	992	0	1253
MSTRG.41646.7	NONBTAT015719.2	97.07	1.03	noncode	737	50	751	8	7	1	737	1742	992	0	1253
MSTRG.41646.7	NONBTAT015718.2	97.07	1.03	noncode	737	50	751	8	7	1	737	1742	992	0	1253
MSTRG.41646.7	NONBTAT015717.2	97.07	1.03	noncode	737	50	751	8	7	1	737	1742	992	0	1253
MSTRG.41646.7	NONHSAT222441.1	97.07	1.03	noncode	737	50	750	9	6	1	737	1741	992	0	1251
MSTRG.41646.7	NONHSAT193358.1	97.07	1.03	noncode	737	50	750	9	6	1	737	1741	992	0	1251
MSTRG.41646.7	NONHSAT193357.1	97.07	1.03	noncode	737	50	750	9	6	1	737	5399	4650	0	1251
MSTRG.41646.7	NONHSAT190640.1	97.07	1.03	noncode	737	50	750	9	6	1	737	1741	992	0	1251
MSTRG.41646.7	NONHSAT190639.1	97.07	1.03	noncode	737	50	750	9	6	1	737	1741	992	0	1251
MSTRG.41646.7	NONHSAT190635.1	97.07	1.03	noncode	737	50	750	9	6	1	737	1741	992	0	1251
MSTRG.41646.7	NONHSAT135873.2	97.07	1.03	noncode	737	50	750	9	6	1	737	5395	4646	0	1251
MSTRG.41646.7	NONHSAT222441.1	97.07	1.03	noncode	737	50	750	9	6	1	737	1741	992	0	1251
MSTRG.41646.7	NONHSAT193358.1	97.07	1.03	noncode	737	50	750	9	6	1	737	1741	992	0	1251
MSTRG.41646.7	NONHSAT193357.1	97.07	1.03	noncode	737	50	750	9	6	1	737	5399	4650	0	1251
MSTRG.41646.7	NONHSAT190640.1	97.07	1.03	noncode	737	50	750	9	6	1	737	1741	992	0	1251
MSTRG.41646.7	NONHSAT190639.1	97.07	1.03	noncode	737	50	750	9	6	1	737	1741	992	0	1251
MSTRG.41646.7	NONHSAT190635.1	97.07	1.03	noncode	737	50	750	9	6	1	737	1741	992	0	1251
MSTRG.41646.7	NONHSAT135873.2	97.07	1.03	noncode	737	50	750	9	6	1	737	5395	4646	0	1251
MSTRG.41646.7	NONMMUT029642.2	96.65	1.02	noncode	737	50	746	12	6	5	737	5100	4355	0	1227
MSTRG.41646.7	NONMMUT029642.2	96.65	1.02	noncode	737	50	746	12	6	5	737	5100	4355	0	1227
MSTRG.41646.7	NONMMUT029667.2	96.47	0.97	noncode	737	50	709	12	6	42	737	1701	993	0	1158
MSTRG.41646.7	NONMMUT029667.2	96.47	0.97	noncode	737	50	709	12	6	42	737	1701	993	0	1158
MSTRG.41646.7	NONHSAT191165.1	96.93	0.94	noncode	737	50	685	8	6	66	737	1	685	0	1136
MSTRG.41646.7	NONHSAT191164.1	96.93	0.94	noncode	737	50	685	8	6	66	737	1	685	0	1136
MSTRG.41646.7	NONHSAT191162.1	96.93	0.94	noncode	737	50	685	8	6	66	737	1	685	0	1136
MSTRG.41646.7	NONHSAT191165.1	96.93	0.94	noncode	737	50	685	8	6	66	737	1	685	0	1136
MSTRG.41646.7	NONHSAT191164.1	96.93	0.94	noncode	737	50	685	8	6	66	737	1	685	0	1136
MSTRG.41646.7	NONHSAT191162.1	96.93	0.94	noncode	737	50	685	8	6	66	737	1	685	0	1136
MSTRG.41646.7	NONMMUT102084.1	96.35	0.94	noncode	737	50	685	12	6	66	737	1	685	0	1114
MSTRG.41646.7	NONHSAT191163.1	96.36	0.94	noncode	737	50	686	10	7	66	737	1	685	0	1114
MSTRG.41646.7	NONMMUT102084.1	96.35	0.94	noncode	737	50	685	12	6	66	737	1	685	0	1114
MSTRG.41646.7	NONHSAT191163.1	96.36	0.94	noncode	737	50	686	10	7	66	737	1	685	0	1114
MSTRG.41646.7	NONCELT001394.2	83.75	1	noncode	737	50	720	90	15	30	737	1604	900	0	656
MSTRG.41646.7	NONCELT001387.2	83.75	1	noncode	737	50	720	90	15	30	737	1604	900	0	656
MSTRG.41646.7	NONCELT001394.2	83.75	1	noncode	737	50	720	90	15	30	737	1604	900	0	656
MSTRG.41646.7	NONCELT001387.2	83.75	1	noncode	737	50	720	90	15	30	737	1604	900	0	656
MSTRG.41646.7	NONATHG002169.1	82.3	1.04	noncode	737	1808	740	101	23	16	736	1668	940	1e-173	614
MSTRG.41646.7	NONATHG002169.1	82.3	1.04	noncode	737	1808	740	101	23	16	736	1668	940	1e-173	614
MSTRG.41646.7	NONATHG000930.1	82.16	1.04	noncode	737	1808	740	102	23	16	736	1668	940	5e-172	608
MSTRG.41646.7	NONATHG000930.1	82.16	1.04	noncode	737	1808	740	102	23	16	736	1668	940	5e-172	608
MSTRG.41646.7	NONSCET000298.2	81.62	1.04	noncode	737	50	751	113	15	1	736	1676	936	3e-169	599
MSTRG.41646.7	NONSCET000293.2	81.62	1.04	noncode	737	50	751	113	15	1	736	1676	936	3e-169	599
MSTRG.41646.7	NONSCET000298.2	81.62	1.04	noncode	737	50	751	113	15	1	736	1676	936	3e-169	599
MSTRG.41646.7	NONSCET000293.2	81.62	1.04	noncode	737	50	751	113	15	1	736	1676	936	3e-169	599
MSTRG.95758.1	NONGGAT014020.1	92.08	1.04	noncode	256	50	265	12	1	1	256	1924	2188	4e-99	364
MSTRG.95758.1	NONGGAT014020.1	92.08	1.04	noncode	256	50	265	12	1	1	256	1924	2188	4e-99	364
MSTRG.95758.1	NONGGAT014535.1	92.05	1.04	noncode	256	50	264	12	1	1	255	1541	1278	2e-98	363
MSTRG.95758.1	NONGGAT014535.1	92.05	1.04	noncode	256	50	264	12	1	1	255	1541	1278	2e-98	363
MSTRG.95758.1	NONGGAT001309.2	91.22	1.04	noncode	256	50	262	12	5	6	256	3183	3444	2e-93	346
MSTRG.95758.1	NONGGAT001309.2	91.22	1.04	noncode	256	50	262	12	5	6	256	3183	3444	2e-93	346
MSTRG.95758.1	NONGGAT014506.1	89.39	1.04	noncode	256	50	264	20	2	1	256	1038	1301	2e-87	326
MSTRG.95758.1	NONGGAT014506.1	89.39	1.04	noncode	256	50	264	20	2	1	256	1038	1301	2e-87	326
MSTRG.95758.1	NONGGAT016647.1	89.39	1.05	noncode	256	50	264	17	5	4	256	568	831	3e-86	322
MSTRG.95758.1	NONGGAT016647.1	89.39	1.05	noncode	256	50	264	17	5	4	256	568	831	3e-86	322
MSTRG.95758.1	NONGGAT012594.1	89.62	1.03	noncode	256	50	260	16	4	6	254	737	996	9e-86	320
MSTRG.95758.1	NONGGAT012594.1	89.62	1.03	noncode	256	50	260	16	4	6	254	737	996	9e-86	320
MSTRG.95758.1	NONGGAT013012.1	89.06	1.06	noncode	256	50	265	18	5	1	254	2927	2663	3e-85	318
MSTRG.95758.1	NONGGAT013012.1	89.06	1.06	noncode	256	50	265	18	5	1	254	2927	2663	3e-85	318
MSTRG.95758.1	NONGGAT002514.2	88.85	1.03	noncode	256	50	260	17	4	8	256	402	144	2e-82	309
MSTRG.95758.1	NONGGAT002514.2	88.85	1.03	noncode	256	50	260	17	4	8	256	402	144	2e-82	309
MSTRG.95758.1	NONGGAT013979.1	87.5	1.06	noncode	256	50	264	21	6	1	253	1854	1592	6e-78	294
MSTRG.95758.1	NONGGAT012413.1	87.27	1.06	noncode	256	50	267	23	5	1	256	2326	2592	6e-78	294
MSTRG.95758.1	NONGGAT013979.1	87.5	1.06	noncode	256	50	264	21	6	1	253	1854	1592	6e-78	294
MSTRG.95758.1	NONGGAT012413.1	87.27	1.06	noncode	256	50	267	23	5	1	256	2326	2592	6e-78	294
MSTRG.95758.1	NONGGAT001769.2	89.5	0.95	noncode	256	50	238	14	5	1	228	1167	931	7e-77	291
MSTRG.95758.1	NONGGAT001769.2	89.5	0.95	noncode	256	50	238	14	5	1	228	1167	931	7e-77	291
MSTRG.95758.1	NONGGAT009068.2	89.36	0.93	noncode	256	50	235	16	2	3	228	446	680	9e-76	287
MSTRG.95758.1	NONGGAT009068.2	89.36	0.93	noncode	256	50	235	16	2	3	228	446	680	9e-76	287
MSTRG.95758.1	NONGGAT012962.1	86.79	1.05	noncode	256	50	265	24	4	3	256	3491	3755	3e-75	285
MSTRG.95758.1	NONGGAT012962.1	86.79	1.05	noncode	256	50	265	24	4	3	256	3491	3755	3e-75	285
MSTRG.95758.1	NONGGAT016648.1	90.13	0.89	noncode	256	50	223	11	5	45	256	329	551	2e-73	279
MSTRG.95758.1	NONGGAT016648.1	90.13	0.89	noncode	256	50	223	11	5	45	256	329	551	2e-73	279
MSTRG.95758.1	NONGGAT016668.1	87.89	0.9	noncode	256	50	223	14	7	1	211	101	322	1e-64	250
MSTRG.95758.1	NONGGAT016668.1	87.89	0.9	noncode	256	50	223	14	7	1	211	101	322	1e-64	250
MSTRG.55.2	NONGGAT014535.1	95.44	1	noncode	285	50	285	13	0	1	285	1465	1181	3e-126	455
MSTRG.55.2	NONGGAT014535.1	95.44	1	noncode	285	50	285	13	0	1	285	1465	1181	3e-126	455
MSTRG.55.2	NONGGAT014020.1	93.68	1	noncode	285	50	285	18	0	1	285	2000	2284	6e-118	427
MSTRG.55.2	NONGGAT014020.1	93.68	1	noncode	285	50	285	18	0	1	285	2000	2284	6e-118	427
MSTRG.55.2	NONGGAT016647.1	89.86	1.01	noncode	285	50	286	28	1	1	285	642	927	1e-99	366
MSTRG.55.2	NONGGAT016647.1	89.86	1.01	noncode	285	50	286	28	1	1	285	642	927	1e-99	366
MSTRG.55.2	NONGGAT012594.1	89.51	1.01	noncode	285	50	286	27	2	1	285	809	1092	2e-97	359
MSTRG.55.2	NONGGAT012594.1	89.51	1.01	noncode	285	50	286	27	2	1	285	809	1092	2e-97	359
MSTRG.55.2	NONGGAT002514.2	88.81	1.01	noncode	285	50	286	30	2	1	285	333	49	1e-94	350
MSTRG.55.2	NONGGAT002514.2	88.81	1.01	noncode	285	50	286	30	2	1	285	333	49	1e-94	350
MSTRG.55.2	NONGGAT012962.1	89.05	0.96	noncode	285	50	274	29	1	10	282	3575	3848	3e-91	339
MSTRG.55.2	NONGGAT012962.1	89.05	0.96	noncode	285	50	274	29	1	10	282	3575	3848	3e-91	339
MSTRG.55.2	NONGGAT014506.1	88.45	0.98	noncode	285	50	277	28	3	1	276	1115	1388	5e-89	331
MSTRG.55.2	NONGGAT001309.2	91.67	0.85	noncode	285	50	240	19	1	1	239	3255	3494	5e-89	331
MSTRG.55.2	NONGGAT014506.1	88.45	0.98	noncode	285	50	277	28	3	1	276	1115	1388	5e-89	331
MSTRG.55.2	NONGGAT001309.2	91.67	0.85	noncode	285	50	240	19	1	1	239	3255	3494	5e-89	331
MSTRG.55.2	NONGGAT016648.1	90.43	0.81	noncode	285	50	230	20	2	1	228	362	591	4e-80	302
MSTRG.55.2	NONGGAT016648.1	90.43	0.81	noncode	285	50	230	20	2	1	228	362	591	4e-80	302
MSTRG.55.2	NONGGAT012413.1	88.84	0.82	noncode	285	50	233	25	1	1	232	2403	2635	4e-75	285
MSTRG.55.2	NONGGAT012413.1	88.84	0.82	noncode	285	50	233	25	1	1	232	2403	2635	4e-75	285
MSTRG.68039.1	NONGGAT004758.2	100	1	noncode	314	50	314	0	0	1	314	69	382	5e-164	580
MSTRG.68039.1	NONGGAT004757.2	100	1	noncode	314	50	314	0	0	1	314	3093	3406	5e-164	580
MSTRG.68039.1	NONGGAT004758.2	100	1	noncode	314	50	314	0	0	1	314	69	382	5e-164	580
MSTRG.68039.1	NONGGAT004757.2	100	1	noncode	314	50	314	0	0	1	314	3093	3406	5e-164	580
MSTRG.97577.1	NONGGAT009468.2	100	1	noncode	1116	50	1116	0	0	1	1116	356	1471	0	2061
MSTRG.97577.1	NONGGAT009468.2	100	1	noncode	1116	50	1116	0	0	1	1116	356	1471	0	2061
MSTRG.12067.1	NONGGAT001188.2	95.28	0.99	noncode	235	50	233	11	0	3	235	490	258	8e-101	370
MSTRG.12067.1	NONGGAT001188.2	95.28	0.99	noncode	235	50	233	11	0	3	235	490	258	8e-101	370
MSTRG.12067.1	NONGGAT012480.1	91.34	0.99	noncode	235	50	231	18	1	7	235	860	1090	4e-84	315
MSTRG.12067.1	NONGGAT012480.1	91.34	0.99	noncode	235	50	231	18	1	7	235	860	1090	4e-84	315
MSTRG.12067.1	NONGGAT012481.1	91.13	0.86	noncode	235	50	203	18	0	7	209	780	982	2e-72	276
MSTRG.12067.1	NONGGAT012481.1	91.13	0.86	noncode	235	50	203	18	0	7	209	780	982	2e-72	276
MSTRG.12067.1	NONGGAT012964.1	81.87	0.82	noncode	235	50	193	34	1	43	235	592	401	5e-38	161
MSTRG.12067.1	NONGGAT012964.1	81.87	0.82	noncode	235	50	193	34	1	43	235	592	401	5e-38	161
MSTRG.41715.56	NONGGAT003016.2	93.26	0.82	noncode	806	50	653	18	10	1	632	648	1	0	939
MSTRG.41715.56	NONGGAT003016.2	93.26	0.82	noncode	806	50	653	18	10	1	632	648	1	0	939
MSTRG.41715.40	NONGGAT003016.2	96.23	0.89	noncode	390	50	345	12	1	1	345	344	1	6e-159	564
MSTRG.41715.40	NONGGAT003016.2	96.23	0.89	noncode	390	50	345	12	1	1	345	344	1	6e-159	564
MSTRG.41715.40	NONGGAT002995.2	85.59	0.89	noncode	390	50	347	45	2	28	374	754	1095	3e-97	359
MSTRG.41715.40	NONGGAT002995.2	85.59	0.89	noncode	390	50	347	45	2	28	374	754	1095	3e-97	359
MSTRG.36454.1	NONGGAT002527.2	100	0.89	noncode	661	50	589	0	0	73	661	668	80	0	1088
MSTRG.36454.1	NONGGAT002526.2	100	0.89	noncode	661	50	589	0	0	73	661	668	80	0	1088
MSTRG.36454.1	NONGGAT002525.2	100	0.89	noncode	661	50	589	0	0	73	661	668	80	0	1088
MSTRG.36454.1	NONGGAT002524.2	100	0.89	noncode	661	50	589	0	0	73	661	668	80	0	1088
MSTRG.36454.1	NONGGAT002527.2	100	0.89	noncode	661	50	589	0	0	73	661	668	80	0	1088
MSTRG.36454.1	NONGGAT002526.2	100	0.89	noncode	661	50	589	0	0	73	661	668	80	0	1088
MSTRG.36454.1	NONGGAT002525.2	100	0.89	noncode	661	50	589	0	0	73	661	668	80	0	1088
MSTRG.36454.1	NONGGAT002524.2	100	0.89	noncode	661	50	589	0	0	73	661	668	80	0	1088
MSTRG.96540.6	NONGGAT010344.2	95.94	0.88	noncode	1407	50	1233	48	2	176	1407	1	1232	0	1999
MSTRG.96540.6	NONGGAT010344.2	95.94	0.88	noncode	1407	50	1233	48	2	176	1407	1	1232	0	1999
MSTRG.96540.6	NONGGAT010332.2	96.65	0.81	noncode	1407	50	1135	36	2	274	1407	1	1134	0	1884
MSTRG.96540.6	NONGGAT010332.2	96.65	0.81	noncode	1407	50	1135	36	2	274	1407	1	1134	0	1884
MSTRG.96540.6	NONGGAT010335.2	90.85	0.81	noncode	1407	50	1126	83	11	199	1314	1	1116	0	1491
MSTRG.96540.6	NONGGAT010335.2	83.19	0.82	noncode	1407	50	1136	161	23	287	1407	2	1122	0	1013
MSTRG.96540.6	NONGGAT010335.2	90.85	0.81	noncode	1407	50	1126	83	11	199	1314	1	1116	0	1491
MSTRG.96540.6	NONGGAT010335.2	83.19	0.82	noncode	1407	50	1136	161	23	287	1407	2	1122	0	1013
MSTRG.154034.1	NONGGAT011498.2	99.34	0.84	noncode	538	50	453	2	1	86	538	855	404	0	819
MSTRG.154034.1	NONGGAT011498.2	99.34	0.84	noncode	538	50	453	2	1	86	538	855	404	0	819
MSTRG.147656.1	NONGGAT011786.2	99.85	1	noncode	675	50	676	0	1	1	675	4028	3353	0	1242
MSTRG.147656.1	NONGGAT011786.2	99.85	1	noncode	675	50	676	0	1	1	675	4028	3353	0	1242
MSTRG.37054.2	NONGGAT002571.2	95.61	0.9	noncode	924	50	820	11	17	93	887	1	820	0	1291
MSTRG.37054.2	NONGGAT002571.2	95.61	0.9	noncode	924	50	820	11	17	93	887	1	820	0	1291
MSTRG.64834.1	NONGGAT012967.1	88.8	0.83	noncode	290	50	241	26	1	47	286	281	41	6e-78	294
MSTRG.64834.1	NONGGAT012967.1	88.8	0.83	noncode	290	50	241	26	1	47	286	281	41	6e-78	294
MSTRG.64834.1	NONGGAT009068.2	86.53	0.86	noncode	290	50	245	27	5	46	287	423	664	5e-69	265
MSTRG.64834.1	NONGGAT009068.2	86.53	0.86	noncode	290	50	245	27	5	46	287	423	664	5e-69	265
MSTRG.69853.7	NONGGAT004890.2	100	0.83	noncode	571	50	476	0	0	1	476	106	581	0	880
MSTRG.69853.7	NONGGAT004890.2	100	0.83	noncode	571	50	476	0	0	1	476	106	581	0	880
MSTRG.5587.2	NONGGAT000370.2	100	0.84	noncode	266	50	224	0	0	43	266	96	319	4e-114	414
MSTRG.5587.2	NONGGAT000370.2	100	0.84	noncode	266	50	224	0	0	43	266	96	319	4e-114	414
MSTRG.5587.2	NONGGAT000371.2	100	0.83	noncode	266	50	220	0	0	42	261	117	336	7e-112	407
MSTRG.5587.2	NONGGAT000371.2	100	0.83	noncode	266	50	220	0	0	42	261	117	336	7e-112	407
MSTRG.144432.2	NONGGAT012481.1	91.05	1	noncode	257	50	257	23	0	1	257	948	692	4e-94	348
MSTRG.144432.2	NONGGAT012480.1	91.05	1	noncode	257	50	257	23	0	1	257	1028	772	4e-94	348
MSTRG.144432.2	NONGGAT012481.1	91.05	1	noncode	257	50	257	23	0	1	257	948	692	4e-94	348
MSTRG.144432.2	NONGGAT012480.1	91.05	1	noncode	257	50	257	23	0	1	257	1028	772	4e-94	348
MSTRG.144432.2	NONGGAT005571.2	92.53	0.94	noncode	257	50	241	17	1	1	241	855	1094	5e-93	344
MSTRG.144432.2	NONGGAT005569.2	92.53	0.94	noncode	257	50	241	17	1	1	241	855	1094	5e-93	344
MSTRG.144432.2	NONGGAT005571.2	92.53	0.94	noncode	257	50	241	17	1	1	241	855	1094	5e-93	344
MSTRG.144432.2	NONGGAT005569.2	92.53	0.94	noncode	257	50	241	17	1	1	241	855	1094	5e-93	344
MSTRG.144432.2	NONGGAT000259.2	90.66	1	noncode	257	50	257	23	1	1	257	20	275	7e-92	340
MSTRG.144432.2	NONGGAT000259.2	90.66	1	noncode	257	50	257	23	1	1	257	20	275	7e-92	340
MSTRG.144432.2	NONGGAT013042.1	94.69	0.81	noncode	257	50	207	11	0	51	257	327	121	3e-86	322
MSTRG.144432.2	NONGGAT012527.1	94.69	0.81	noncode	257	50	207	11	0	51	257	346	552	3e-86	322
MSTRG.144432.2	NONGGAT013042.1	94.69	0.81	noncode	257	50	207	11	0	51	257	327	121	3e-86	322
MSTRG.144432.2	NONGGAT012527.1	94.69	0.81	noncode	257	50	207	11	0	51	257	346	552	3e-86	322
MSTRG.144432.2	NONGGAT001424.2	80.29	0.82	noncode	257	50	208	37	4	1	206	310	515	1e-35	154
MSTRG.144432.2	NONGGAT001423.2	80.29	0.82	noncode	257	50	208	37	4	1	206	448	653	1e-35	154
MSTRG.144432.2	NONGGAT001424.2	80.29	0.82	noncode	257	50	208	37	4	1	206	310	515	1e-35	154
MSTRG.144432.2	NONGGAT001423.2	80.29	0.82	noncode	257	50	208	37	4	1	206	448	653	1e-35	154
MSTRG.125224.2	NONGGAT008038.2	100	0.86	noncode	1051	50	901	0	0	61	961	42	942	0	1664
MSTRG.125224.2	NONGGAT008038.2	100	0.86	noncode	1051	50	901	0	0	61	961	42	942	0	1664
MSTRG.109039.10	NONGGAT007107.2	100	0.85	noncode	1930	50	1641	0	0	218	1858	399	2039	0	3031
MSTRG.109039.10	NONGGAT007107.2	100	0.85	noncode	1930	50	1641	0	0	218	1858	399	2039	0	3031
MSTRG.144574.37	NONGGAT016647.1	93.97	1.01	noncode	366	50	365	19	3	3	366	592	954	2e-154	549
MSTRG.144574.37	NONGGAT016647.1	93.97	1.01	noncode	366	50	365	19	3	3	366	592	954	2e-154	549
MSTRG.144574.37	NONGGAT014535.1	90.74	1.02	noncode	366	50	367	29	5	1	366	1516	1154	5e-135	484
MSTRG.144574.37	NONGGAT014535.1	90.74	1.02	noncode	366	50	367	29	5	1	366	1516	1154	5e-135	484
MSTRG.144574.37	NONGGAT012962.1	90.16	1	noncode	366	50	366	35	1	1	366	3514	3878	3e-132	475
MSTRG.144574.37	NONGGAT012962.1	90.16	1	noncode	366	50	366	35	1	1	366	3514	3878	3e-132	475
MSTRG.144574.37	NONGGAT012594.1	90.8	0.96	noncode	366	50	348	29	2	19	366	775	1119	2e-128	462
MSTRG.144574.37	NONGGAT012594.1	90.8	0.96	noncode	366	50	348	29	2	19	366	775	1119	2e-128	462
MSTRG.144574.37	NONGGAT014020.1	88.73	0.99	noncode	366	50	355	33	6	1	353	1949	2298	8e-118	427
MSTRG.144574.37	NONGGAT014020.1	88.73	0.99	noncode	366	50	355	33	6	1	353	1949	2298	8e-118	427
MSTRG.144574.37	NONGGAT002514.2	87.74	1.02	noncode	366	50	367	38	6	1	365	384	23	4e-116	422
MSTRG.144574.37	NONGGAT002514.2	87.74	1.02	noncode	366	50	367	38	6	1	365	384	23	4e-116	422
MSTRG.144574.37	NONGGAT012006.2	87.43	1.01	noncode	366	50	366	44	2	1	366	1314	951	1e-115	420
MSTRG.144574.37	NONGGAT012006.2	87.43	1.01	noncode	366	50	366	44	2	1	366	8691	8328	1e-115	420
MSTRG.144574.37	NONGGAT012006.2	87.16	1.01	noncode	366	50	366	45	2	1	366	4937	4574	6e-114	414
MSTRG.144574.37	NONGGAT012006.2	87.43	1.01	noncode	366	50	366	44	2	1	366	1314	951	1e-115	420
MSTRG.144574.37	NONGGAT012006.2	87.43	1.01	noncode	366	50	366	44	2	1	366	8691	8328	1e-115	420
MSTRG.144574.37	NONGGAT012006.2	87.16	1.01	noncode	366	50	366	45	2	1	366	4937	4574	6e-114	414
MSTRG.144574.37	NONGGAT014506.1	85.24	0.92	noncode	366	50	332	41	7	1	330	1063	1388	5e-90	335
MSTRG.144574.37	NONGGAT014506.1	85.24	0.92	noncode	366	50	332	41	7	1	330	1063	1388	5e-90	335
MSTRG.119475.1	NONGGAT007698.2	100	0.87	noncode	508	50	441	0	0	68	508	883	1323	0	815
MSTRG.119475.1	NONGGAT007698.2	100	0.87	noncode	508	50	441	0	0	68	508	883	1323	0	815
MSTRG.119475.1	NONGGAT007700.2	100	0.83	noncode	508	50	420	0	0	1	420	181	600	0	776
MSTRG.119475.1	NONGGAT007700.2	100	0.83	noncode	508	50	420	0	0	1	420	181	600	0	776
MSTRG.144514.2	NONGGAT011053.2	100	0.93	noncode	660	50	616	0	0	37	652	1	616	0	1138
MSTRG.144514.2	NONGGAT011053.2	100	0.93	noncode	660	50	616	0	0	37	652	1	616	0	1138
MSTRG.123448.11	NONGGAT014535.1	94.35	1.01	noncode	353	50	354	18	2	1	353	1512	1160	3e-152	542
MSTRG.123448.11	NONGGAT014535.1	94.35	1.01	noncode	353	50	354	18	2	1	353	1512	1160	3e-152	542
MSTRG.123448.11	NONGGAT014020.1	94.8	0.98	noncode	353	50	346	18	0	1	346	1953	2298	9e-152	540
MSTRG.123448.11	NONGGAT014020.1	94.8	0.98	noncode	353	50	346	18	0	1	346	1953	2298	9e-152	540
MSTRG.123448.11	NONGGAT016647.1	90.14	1.01	noncode	353	50	355	33	2	1	353	594	948	7e-128	460
MSTRG.123448.11	NONGGAT016647.1	90.14	1.01	noncode	353	50	355	33	2	1	353	594	948	7e-128	460
MSTRG.123448.11	NONGGAT002514.2	90.11	1.01	noncode	353	50	354	33	2	1	353	380	28	3e-127	459
MSTRG.123448.11	NONGGAT002514.2	90.11	1.01	noncode	353	50	354	33	2	1	353	380	28	3e-127	459
MSTRG.123448.11	NONGGAT012594.1	89.74	0.97	noncode	353	50	341	31	3	15	353	775	1113	2e-119	433
MSTRG.123448.11	NONGGAT012594.1	89.74	0.97	noncode	353	50	341	31	3	15	353	775	1113	2e-119	433
MSTRG.123448.11	NONGGAT012962.1	87.32	1.01	noncode	353	50	355	43	2	1	353	3518	3872	4e-111	405
MSTRG.123448.11	NONGGAT012962.1	87.32	1.01	noncode	353	50	355	43	2	1	353	3518	3872	4e-111	405
MSTRG.123448.11	NONGGAT014506.1	88.74	0.86	noncode	353	50	302	30	3	23	323	1090	1388	2e-99	366
MSTRG.123448.11	NONGGAT014506.1	88.74	0.86	noncode	353	50	302	30	3	23	323	1090	1388	2e-99	366
MSTRG.96540.10	NONGGAT010332.2	99.74	1	noncode	781	50	781	2	0	1	781	65	845	0	1432
MSTRG.96540.10	NONGGAT010332.2	99.74	1	noncode	781	50	781	2	0	1	781	65	845	0	1432
MSTRG.96540.10	NONGGAT010344.2	99.1	1	noncode	781	50	781	7	0	1	781	163	943	0	1404
MSTRG.96540.10	NONGGAT010344.2	99.1	1	noncode	781	50	781	7	0	1	781	163	943	0	1404
MSTRG.96540.10	NONGGAT010335.2	95.26	0.95	noncode	781	50	739	27	2	1	739	140	870	0	1164
MSTRG.96540.10	NONGGAT010335.2	95.26	0.95	noncode	781	50	739	27	2	1	739	140	870	0	1164
MSTRG.96540.10	NONGGAT010346.2	93.9	0.95	noncode	781	50	738	35	4	3	739	41	769	0	1105
MSTRG.96540.10	NONGGAT010346.2	93.9	0.95	noncode	781	50	738	35	4	3	739	41	769	0	1105
MSTRG.98891.1	NONGGAT006642.2	100	0.83	noncode	1272	50	1050	0	0	223	1272	24	1073	0	1940
MSTRG.98891.1	NONGGAT006642.2	100	0.83	noncode	1272	50	1050	0	0	223	1272	24	1073	0	1940
MSTRG.55113.1	NONGGAT004010.2	100	1	noncode	209	50	209	0	0	1	209	71	279	7e-106	387
MSTRG.55113.1	NONGGAT004010.2	100	1	noncode	209	50	209	0	0	1	209	71	279	7e-106	387
MSTRG.21991.23	NONGGAT001404.2	99.91	0.84	noncode	1276	50	1067	1	0	134	1200	14	1080	0	1965
MSTRG.21991.23	NONGGAT001404.2	99.91	0.84	noncode	1276	50	1067	1	0	134	1200	14	1080	0	1965
MSTRG.63865.2	NONGGAT012480.1	91.69	1.01	noncode	359	50	361	28	1	1	359	758	1118	2e-139	499
MSTRG.63865.2	NONGGAT012480.1	91.69	1.01	noncode	359	50	361	28	1	1	359	758	1118	2e-139	499
MSTRG.63865.2	NONGGAT001188.2	95.24	0.82	noncode	359	50	294	14	0	66	359	523	230	2e-129	466
MSTRG.63865.2	NONGGAT001188.2	95.24	0.82	noncode	359	50	294	14	0	66	359	523	230	2e-129	466
MSTRG.63865.2	NONGGAT005571.2	92.1	0.92	noncode	359	50	329	22	2	31	359	1094	770	8e-128	460
MSTRG.63865.2	NONGGAT005569.2	92.1	0.92	noncode	359	50	329	22	2	31	359	1094	770	8e-128	460
MSTRG.63865.2	NONGGAT005571.2	92.1	0.92	noncode	359	50	329	22	2	31	359	1094	770	8e-128	460
MSTRG.63865.2	NONGGAT005569.2	92.1	0.92	noncode	359	50	329	22	2	31	359	1094	770	8e-128	460
MSTRG.63865.2	NONGGAT012481.1	91.48	0.85	noncode	359	50	305	26	0	1	305	678	982	1e-115	420
MSTRG.63865.2	NONGGAT012481.1	91.48	0.85	noncode	359	50	305	26	0	1	305	678	982	1e-115	420
MSTRG.63865.2	NONGGAT001424.2	81.23	0.83	noncode	359	50	293	46	8	66	351	515	225	8e-58	228
MSTRG.63865.2	NONGGAT001423.2	81.23	0.83	noncode	359	50	293	46	8	66	351	653	363	8e-58	228
MSTRG.63865.2	NONGGAT001424.2	81.23	0.83	noncode	359	50	293	46	8	66	351	515	225	8e-58	228
MSTRG.63865.2	NONGGAT001423.2	81.23	0.83	noncode	359	50	293	46	8	66	351	653	363	8e-58	228
MSTRG.63865.2	NONGGAT012964.1	80.33	0.85	noncode	359	50	300	52	7	50	346	681	386	1e-55	220
MSTRG.63865.2	NONGGAT012964.1	80.33	0.85	noncode	359	50	300	52	7	50	346	681	386	1e-55	220
MSTRG.80280.1	NONGGAT012480.1	88.71	1	noncode	250	50	248	27	1	1	248	1357	1603	3e-80	302
MSTRG.80280.1	NONGGAT012480.1	88.71	1	noncode	250	50	248	27	1	1	248	1357	1603	3e-80	302
MSTRG.77761.3	NONGGAT005614.2	100	0.94	noncode	530	50	496	0	0	35	530	240	735	0	917
MSTRG.77761.3	NONGGAT005614.2	100	0.94	noncode	530	50	496	0	0	35	530	240	735	0	917
MSTRG.144491.1	NONGGAT011498.2	83.38	0.97	noncode	369	50	355	55	2	17	368	502	149	3e-87	326
MSTRG.144491.1	NONGGAT011498.2	83.38	0.97	noncode	369	50	355	55	2	17	368	502	149	3e-87	326
MSTRG.123513.1	NONGGAT014020.1	95.63	0.99	noncode	209	50	206	9	0	4	209	1961	2166	3e-89	331
MSTRG.123513.1	NONGGAT014020.1	95.63	0.99	noncode	209	50	206	9	0	4	209	1961	2166	3e-89	331
MSTRG.123513.1	NONGGAT014535.1	94.69	1	noncode	209	50	207	9	2	4	209	1504	1299	7e-86	320
MSTRG.123513.1	NONGGAT014535.1	94.69	1	noncode	209	50	207	9	2	4	209	1504	1299	7e-86	320
MSTRG.123513.1	NONGGAT001769.2	92.54	0.97	noncode	209	50	201	13	2	4	203	1130	931	7e-76	287
MSTRG.123513.1	NONGGAT001769.2	92.54	0.97	noncode	209	50	201	13	2	4	203	1130	931	7e-76	287
MSTRG.123513.1	NONGGAT002514.2	92.42	0.95	noncode	209	50	198	14	1	10	206	366	169	3e-74	281
MSTRG.123513.1	NONGGAT002514.2	92.42	0.95	noncode	209	50	198	14	1	10	206	366	169	3e-74	281
MSTRG.123513.1	NONGGAT016648.1	91.22	0.99	noncode	209	50	205	16	2	4	206	322	526	4e-73	278
MSTRG.123513.1	NONGGAT016647.1	91.22	0.99	noncode	209	50	205	16	2	4	206	602	806	4e-73	278
MSTRG.123513.1	NONGGAT016648.1	91.22	0.99	noncode	209	50	205	16	2	4	206	322	526	4e-73	278
MSTRG.123513.1	NONGGAT016647.1	91.22	0.99	noncode	209	50	205	16	2	4	206	602	806	4e-73	278
MSTRG.123513.1	NONGGAT001309.2	92.67	0.92	noncode	209	50	191	13	1	17	206	3229	3419	6e-72	274
MSTRG.123513.1	NONGGAT001309.2	92.67	0.92	noncode	209	50	191	13	1	17	206	3229	3419	6e-72	274
MSTRG.123513.1	NONGGAT012594.1	90.59	0.98	noncode	209	50	202	17	2	10	209	775	976	1e-69	267
MSTRG.123513.1	NONGGAT012594.1	90.59	0.98	noncode	209	50	202	17	2	10	209	775	976	1e-69	267
MSTRG.123513.1	NONGGAT014506.1	91.67	0.92	noncode	209	50	192	14	1	18	209	1090	1279	4e-69	265
MSTRG.123513.1	NONGGAT014506.1	91.67	0.92	noncode	209	50	192	14	1	18	209	1090	1279	4e-69	265
MSTRG.123513.1	NONGGAT012413.1	89.42	1	noncode	209	50	208	20	2	4	209	2363	2570	5e-68	261
MSTRG.123513.1	NONGGAT012413.1	89.42	1	noncode	209	50	208	20	2	4	209	2363	2570	5e-68	261
MSTRG.123513.1	NONGGAT013012.1	90.05	0.97	noncode	209	50	201	18	2	11	209	2883	2683	2e-67	259
MSTRG.123513.1	NONGGAT009068.2	90.1	0.98	noncode	209	50	202	16	2	4	203	481	680	2e-67	259
MSTRG.123513.1	NONGGAT013012.1	90.05	0.97	noncode	209	50	201	18	2	11	209	2883	2683	2e-67	259
MSTRG.123513.1	NONGGAT009068.2	90.1	0.98	noncode	209	50	202	16	2	4	203	481	680	2e-67	259
MSTRG.123513.1	NONGGAT012967.1	91.53	0.86	noncode	209	50	177	11	4	4	177	225	50	6e-62	241
MSTRG.123513.1	NONGGAT012967.1	91.53	0.86	noncode	209	50	177	11	4	4	177	225	50	6e-62	241
MSTRG.123513.1	NONGGAT016668.1	89.39	0.86	noncode	209	50	179	17	2	10	186	144	322	6e-57	224
MSTRG.123513.1	NONGGAT016668.1	89.39	0.86	noncode	209	50	179	17	2	10	186	144	322	6e-57	224
MSTRG.123513.1	NONGGAT012962.1	86.34	0.99	noncode	209	50	205	26	2	4	206	3526	3730	2e-56	222
MSTRG.123513.1	NONGGAT012962.1	86.34	0.99	noncode	209	50	205	26	2	4	206	3526	3730	2e-56	222
MSTRG.47620.9	NONGGAT003675.2	100	0.83	noncode	727	50	607	0	0	121	727	151	757	0	1122
MSTRG.47620.9	NONGGAT003673.2	100	0.83	noncode	727	50	607	0	0	121	727	147	753	0	1122
MSTRG.47620.9	NONGGAT003675.2	100	0.83	noncode	727	50	607	0	0	121	727	151	757	0	1122
MSTRG.47620.9	NONGGAT003673.2	100	0.83	noncode	727	50	607	0	0	121	727	147	753	0	1122
MSTRG.47620.9	NONGGAT003674.2	93.96	0.97	noncode	727	50	695	21	9	34	727	1	675	0	1031
MSTRG.47620.9	NONGGAT003674.2	93.96	0.97	noncode	727	50	695	21	9	34	727	1	675	0	1031
MSTRG.41715.25	NONGGAT003016.2	92.09	0.92	noncode	615	50	556	18	10	51	585	551	1	0	760
MSTRG.41715.25	NONGGAT003016.2	92.09	0.92	noncode	615	50	556	18	10	51	585	551	1	0	760
MSTRG.22417.2	NONGGAT010784.2	93.56	1.01	noncode	294	50	295	15	3	1	293	59	351	1e-120	436
MSTRG.22417.2	NONGGAT010784.2	91.61	1.04	noncode	294	50	298	18	7	1	293	6	301	3e-111	405
MSTRG.22417.2	NONGGAT010784.2	94.58	0.83	noncode	294	50	240	8	4	1	237	110	347	1e-99	366
MSTRG.22417.2	NONGGAT010784.2	89.76	0.88	noncode	294	50	254	18	6	45	294	1	250	4e-85	318
MSTRG.22417.2	NONGGAT010784.2	93.56	1.01	noncode	294	50	295	15	3	1	293	59	351	1e-120	436
MSTRG.22417.2	NONGGAT010784.2	91.61	1.04	noncode	294	50	298	18	7	1	293	6	301	3e-111	405
MSTRG.22417.2	NONGGAT010784.2	94.58	0.83	noncode	294	50	240	8	4	1	237	110	347	1e-99	366
MSTRG.22417.2	NONGGAT010784.2	89.76	0.88	noncode	294	50	254	18	6	45	294	1	250	4e-85	318
MSTRG.10870.1	NONGGAT011892.2	89.42	0.82	noncode	253	50	208	22	0	40	247	114	321	2e-68	263
MSTRG.10870.1	NONGGAT011892.2	89.42	0.82	noncode	253	50	208	22	0	40	247	114	321	2e-68	263
MSTRG.10870.1	NONGGAT003589.2	88.89	0.82	noncode	253	50	207	23	0	41	247	272	478	3e-66	255
MSTRG.10870.1	NONGGAT003589.2	88.89	0.82	noncode	253	50	207	23	0	41	247	272	478	3e-66	255
MSTRG.10870.1	NONGGAT007441.2	88.21	0.84	noncode	253	50	212	23	2	43	253	118	328	3e-65	252
MSTRG.10870.1	NONGGAT007441.2	88.21	0.84	noncode	253	50	212	23	2	43	253	118	328	3e-65	252
MSTRG.10870.1	NONGGAT014316.1	85.85	0.82	noncode	253	50	205	24	4	41	242	6737	6939	2e-53	213
MSTRG.10870.1	NONGGAT014316.1	85.85	0.82	noncode	253	50	205	24	4	41	242	6737	6939	2e-53	213
MSTRG.10870.1	NONGGAT006091.2	84.47	0.82	noncode	253	50	206	30	2	41	245	846	1050	3e-50	202
MSTRG.10870.1	NONGGAT006090.2	84.47	0.82	noncode	253	50	206	30	2	41	245	963	1167	3e-50	202
MSTRG.10870.1	NONGGAT006091.2	84.47	0.82	noncode	253	50	206	30	2	41	245	846	1050	3e-50	202
MSTRG.10870.1	NONGGAT006090.2	84.47	0.82	noncode	253	50	206	30	2	41	245	963	1167	3e-50	202
MSTRG.41716.40	NONGGAT003016.2	97.24	0.9	noncode	443	50	398	4	3	1	397	385	776	0	667
MSTRG.41716.40	NONGGAT003016.2	97.24	0.9	noncode	443	50	398	4	3	1	397	385	776	0	667
MSTRG.96349.1	NONGGAT013298.1	84.04	1.05	noncode	211	50	213	22	9	1	211	1512	1714	5e-48	195
MSTRG.96349.1	NONGGAT013298.1	84.04	1.05	noncode	211	50	213	22	9	1	211	1512	1714	5e-48	195
MSTRG.7998.1	NONGGAT000518.2	100	1	noncode	252	50	252	0	0	1	252	34	285	1e-129	466
MSTRG.7998.1	NONGGAT000518.2	100	1	noncode	252	50	252	0	0	1	252	34	285	1e-129	466
MSTRG.41646.5	NONRATT031966.1	97.82	1.01	noncode	865	50	871	13	4	1	865	1865	995	0	1498
MSTRG.41646.5	NONRATT031966.1	97.82	1.01	noncode	865	50	871	13	4	1	865	1865	995	0	1498
MSTRG.41646.5	NONHSAT222441.1	97.7	1.01	noncode	865	50	871	14	4	1	865	1862	992	0	1493
MSTRG.41646.5	NONHSAT193358.1	97.7	1.01	noncode	865	50	871	14	4	1	865	1862	992	0	1493
MSTRG.41646.5	NONHSAT193357.1	97.7	1.01	noncode	865	50	871	14	4	1	865	5520	4650	0	1493
MSTRG.41646.5	NONHSAT190640.1	97.7	1.01	noncode	865	50	871	14	4	1	865	1862	992	0	1493
MSTRG.41646.5	NONHSAT190639.1	97.7	1.01	noncode	865	50	871	14	4	1	865	1862	992	0	1493
MSTRG.41646.5	NONHSAT190635.1	97.7	1.01	noncode	865	50	871	14	4	1	865	1862	992	0	1493
MSTRG.41646.5	NONHSAT135873.2	97.7	1.01	noncode	865	50	871	14	4	1	865	5516	4646	0	1493
MSTRG.41646.5	NONHSAT222441.1	97.7	1.01	noncode	865	50	871	14	4	1	865	1862	992	0	1493
MSTRG.41646.5	NONHSAT193358.1	97.7	1.01	noncode	865	50	871	14	4	1	865	1862	992	0	1493
MSTRG.41646.5	NONHSAT193357.1	97.7	1.01	noncode	865	50	871	14	4	1	865	5520	4650	0	1493
MSTRG.41646.5	NONHSAT190640.1	97.7	1.01	noncode	865	50	871	14	4	1	865	1862	992	0	1493
MSTRG.41646.5	NONHSAT190639.1	97.7	1.01	noncode	865	50	871	14	4	1	865	1862	992	0	1493
MSTRG.41646.5	NONHSAT190635.1	97.7	1.01	noncode	865	50	871	14	4	1	865	1862	992	0	1493
MSTRG.41646.5	NONHSAT135873.2	97.7	1.01	noncode	865	50	871	14	4	1	865	5516	4646	0	1493
MSTRG.41646.5	NONBTAT029806.1	97.71	1.01	noncode	865	50	872	13	5	1	865	1863	992	0	1493
MSTRG.41646.5	NONBTAT015719.2	97.71	1.01	noncode	865	50	872	13	5	1	865	1863	992	0	1493
MSTRG.41646.5	NONBTAT015718.2	97.71	1.01	noncode	865	50	872	13	5	1	865	1863	992	0	1493
MSTRG.41646.5	NONBTAT015717.2	97.71	1.01	noncode	865	50	872	13	5	1	865	1863	992	0	1493
MSTRG.41646.5	NONBTAT029806.1	97.71	1.01	noncode	865	50	872	13	5	1	865	1863	992	0	1493
MSTRG.41646.5	NONBTAT015719.2	97.71	1.01	noncode	865	50	872	13	5	1	865	1863	992	0	1493
MSTRG.41646.5	NONBTAT015718.2	97.71	1.01	noncode	865	50	872	13	5	1	865	1863	992	0	1493
MSTRG.41646.5	NONBTAT015717.2	97.71	1.01	noncode	865	50	872	13	5	1	865	1863	992	0	1493
MSTRG.41646.5	NONMMUT029642.2	94.83	1.02	noncode	865	50	870	14	15	1	865	5198	4355	0	1328
MSTRG.41646.5	NONMMUT029642.2	94.83	1.02	noncode	865	50	870	14	15	1	865	5198	4355	0	1328
MSTRG.41646.5	NONMMUT029667.2	97.46	0.82	noncode	865	50	709	13	3	162	865	1701	993	0	1205
MSTRG.41646.5	NONMMUT029667.2	97.46	0.82	noncode	865	50	709	13	3	162	865	1701	993	0	1205
MSTRG.41646.5	NONATHG002169.1	81.61	1.06	noncode	865	1808	881	126	34	1	864	1801	940	0	697
MSTRG.41646.5	NONATHG002169.1	81.61	1.06	noncode	865	1808	881	126	34	1	864	1801	940	0	697
MSTRG.41646.5	NONATHG000930.1	81.5	1.06	noncode	865	1808	881	127	34	1	864	1801	940	0	691
MSTRG.41646.5	NONATHG000930.1	81.5	1.06	noncode	865	1808	881	127	34	1	864	1801	940	0	691
MSTRG.41646.5	NONSCET000298.2	81.33	1.03	noncode	865	50	873	139	19	1	864	1793	936	0	688
MSTRG.41646.5	NONSCET000293.2	81.33	1.03	noncode	865	50	873	139	19	1	864	1793	936	0	688
MSTRG.41646.5	NONSCET000298.2	81.33	1.03	noncode	865	50	873	139	19	1	864	1793	936	0	688
MSTRG.41646.5	NONSCET000293.2	81.33	1.03	noncode	865	50	873	139	19	1	864	1793	936	0	688
MSTRG.41646.5	NONCELT001394.2	84.17	0.85	noncode	865	50	720	95	14	150	865	1604	900	0	680
MSTRG.41646.5	NONCELT001387.2	84.17	0.85	noncode	865	50	720	95	14	150	865	1604	900	0	680
MSTRG.41646.5	NONCELT001394.2	84.17	0.85	noncode	865	50	720	95	14	150	865	1604	900	0	680
MSTRG.41646.5	NONCELT001387.2	84.17	0.85	noncode	865	50	720	95	14	150	865	1604	900	0	680
MSTRG.22438.2	NONGGAT001481.2	97.23	0.96	noncode	414	50	397	11	0	1	397	1974	1578	0	673
MSTRG.22438.2	NONGGAT001481.2	97.23	0.96	noncode	414	50	397	11	0	1	397	1974	1578	0	673
MSTRG.65572.1	NONGGAT004558.2	92.27	1	noncode	233	50	233	0	1	1	233	246	460	4e-84	315
MSTRG.65572.1	NONGGAT004558.2	92.27	1	noncode	233	50	233	0	1	1	233	246	460	4e-84	315
MSTRG.74788.1	NONGGAT005371.2	100	1	noncode	372	50	372	0	0	1	372	799	1170	0	688
MSTRG.74788.1	NONGGAT005371.2	100	1	noncode	372	50	372	0	0	1	372	799	1170	0	688
MSTRG.74788.1	NONGGAT005370.2	100	0.91	noncode	372	50	337	0	0	36	372	167	503	9e-177	623
MSTRG.74788.1	NONGGAT005370.2	100	0.91	noncode	372	50	337	0	0	36	372	167	503	9e-177	623
MSTRG.47195.1	NONGGAT009061.2	88.73	0.89	noncode	229	50	204	19	1	3	206	1224	1423	1e-63	246
MSTRG.47195.1	NONGGAT009061.2	88.73	0.89	noncode	229	50	204	19	1	3	206	1224	1423	1e-63	246
MSTRG.47195.1	NONGGAT013298.1	86.49	0.99	noncode	229	50	222	24	5	1	220	1397	1614	2e-61	239
MSTRG.47195.1	NONGGAT013298.1	86.49	0.99	noncode	229	50	222	24	5	1	220	1397	1614	2e-61	239
MSTRG.47195.1	NONGGAT005793.2	84.69	0.94	noncode	229	50	209	24	6	3	208	3699	3496	3e-50	202
MSTRG.47195.1	NONGGAT005793.2	84.69	0.94	noncode	229	50	209	24	6	3	208	3699	3496	3e-50	202
MSTRG.154033.1	NONGGAT011509.2	88.5	0.98	noncode	380	50	374	43	0	7	380	461	88	1e-125	453
MSTRG.154033.1	NONGGAT011509.2	88.5	0.98	noncode	380	50	374	43	0	7	380	461	88	1e-125	453
MSTRG.63864.1	NONGGAT012480.1	91.28	0.99	noncode	499	50	493	40	2	1	490	1238	746	0	669
MSTRG.63864.1	NONGGAT012480.1	91.28	0.99	noncode	499	50	493	40	2	1	490	1238	746	0	669
MSTRG.63864.1	NONGGAT001188.2	95.41	0.83	noncode	499	50	414	18	1	2	414	110	523	0	658
MSTRG.63864.1	NONGGAT001188.2	95.41	0.83	noncode	499	50	414	18	1	2	414	110	523	0	658
MSTRG.63864.1	NONGGAT005571.2	91.31	0.9	noncode	499	50	449	35	2	1	449	650	1094	1e-172	610
MSTRG.63864.1	NONGGAT005569.2	91.31	0.9	noncode	499	50	449	35	2	1	449	650	1094	1e-172	610
MSTRG.63864.1	NONGGAT005571.2	91.31	0.9	noncode	499	50	449	35	2	1	449	650	1094	1e-172	610
MSTRG.63864.1	NONGGAT005569.2	91.31	0.9	noncode	499	50	449	35	2	1	449	650	1094	1e-172	610
MSTRG.53388.4	NONGGAT003911.2	100	0.93	noncode	937	50	870	0	0	18	887	1	870	0	1607
MSTRG.53388.4	NONGGAT003911.2	100	0.93	noncode	937	50	870	0	0	18	887	1	870	0	1607
MSTRG.63864.2	NONGGAT013042.1	95.69	1	noncode	232	50	232	10	0	1	232	318	87	6e-102	374
MSTRG.63864.2	NONGGAT012527.1	95.69	1	noncode	232	50	232	10	0	1	232	355	586	6e-102	374
MSTRG.63864.2	NONGGAT013042.1	95.69	1	noncode	232	50	232	10	0	1	232	318	87	6e-102	374
MSTRG.63864.2	NONGGAT012527.1	95.69	1	noncode	232	50	232	10	0	1	232	355	586	6e-102	374
MSTRG.63864.2	NONGGAT000259.2	91.59	0.98	noncode	232	50	226	18	1	4	229	82	306	5e-83	311
MSTRG.63864.2	NONGGAT000259.2	91.59	0.98	noncode	232	50	226	18	1	4	229	82	306	5e-83	311
MSTRG.63864.2	NONGGAT012481.1	91.4	0.96	noncode	232	50	221	18	1	4	223	886	666	3e-80	302
MSTRG.63864.2	NONGGAT012480.1	91.4	0.96	noncode	232	50	221	18	1	4	223	966	746	3e-80	302
MSTRG.63864.2	NONGGAT012481.1	91.4	0.96	noncode	232	50	221	18	1	4	223	886	666	3e-80	302
MSTRG.63864.2	NONGGAT012480.1	91.4	0.96	noncode	232	50	221	18	1	4	223	966	746	3e-80	302
MSTRG.182.2	NONGGAT000027.2	100	0.87	noncode	1896	50	1645	0	0	77	1721	1996	3640	0	3038
MSTRG.182.2	NONGGAT000027.2	100	0.87	noncode	1896	50	1645	0	0	77	1721	1996	3640	0	3038
MSTRG.153708.1	NONGGAT016647.1	94.49	0.99	noncode	258	50	254	13	1	6	258	568	821	7e-107	390
MSTRG.153708.1	NONGGAT016647.1	94.49	0.99	noncode	258	50	254	13	1	6	258	568	821	7e-107	390
MSTRG.153708.1	NONGGAT014020.1	93.8	1	noncode	258	50	258	15	1	1	258	1922	2178	9e-106	387
MSTRG.153708.1	NONGGAT014020.1	93.8	1	noncode	258	50	258	15	1	1	258	1922	2178	9e-106	387
MSTRG.153708.1	NONGGAT013012.1	93.73	0.99	noncode	258	50	255	15	1	1	254	2929	2675	4e-104	381
MSTRG.153708.1	NONGGAT013012.1	93.73	0.99	noncode	258	50	255	15	1	1	254	2929	2675	4e-104	381
MSTRG.153708.1	NONGGAT014535.1	93.02	1	noncode	258	50	258	17	1	1	258	1543	1287	2e-102	375
MSTRG.153708.1	NONGGAT014535.1	93.02	1	noncode	258	50	258	17	1	1	258	1543	1287	2e-102	375
MSTRG.153708.1	NONGGAT012413.1	93.63	0.98	noncode	258	50	251	15	1	1	250	2324	2574	7e-102	374
MSTRG.153708.1	NONGGAT012413.1	93.63	0.98	noncode	258	50	251	15	1	1	250	2324	2574	7e-102	374
MSTRG.153708.1	NONGGAT001769.2	94.58	0.93	noncode	258	50	240	12	1	1	240	1169	931	9e-101	370
MSTRG.153708.1	NONGGAT001769.2	94.58	0.93	noncode	258	50	240	12	1	1	240	1169	931	9e-101	370
MSTRG.153708.1	NONGGAT013979.1	92.25	1	noncode	258	50	258	20	0	1	258	1856	1599	1e-99	366
MSTRG.153708.1	NONGGAT013979.1	92.25	1	noncode	258	50	258	20	0	1	258	1856	1599	1e-99	366
MSTRG.153708.1	NONGGAT001309.2	92.86	0.98	noncode	258	50	252	17	1	8	258	3183	3434	4e-99	364
MSTRG.153708.1	NONGGAT001309.2	92.86	0.98	noncode	258	50	252	17	1	8	258	3183	3434	4e-99	364
MSTRG.153708.1	NONGGAT012962.1	91.89	1.01	noncode	258	50	259	20	1	1	258	3487	3745	5e-98	361
MSTRG.153708.1	NONGGAT012962.1	91.89	1.01	noncode	258	50	259	20	1	1	258	3487	3745	5e-98	361
MSTRG.153708.1	NONGGAT016648.1	95.07	0.87	noncode	258	50	223	10	1	37	258	319	541	1e-94	350
MSTRG.153708.1	NONGGAT016648.1	95.07	0.87	noncode	258	50	223	10	1	37	258	319	541	1e-94	350
MSTRG.153708.1	NONGGAT002514.2	91.16	0.97	noncode	258	50	249	22	0	10	258	402	154	3e-91	339
MSTRG.153708.1	NONGGAT002514.2	91.16	0.97	noncode	258	50	249	22	0	10	258	402	154	3e-91	339
MSTRG.153708.1	NONGGAT012594.1	90.94	1	noncode	258	50	254	18	4	8	258	737	988	9e-91	337
MSTRG.153708.1	NONGGAT012594.1	90.94	1	noncode	258	50	254	18	4	8	258	737	988	9e-91	337
MSTRG.153708.1	NONGGAT014506.1	89.88	1.01	noncode	258	50	257	22	3	3	258	1038	1291	6e-88	327
MSTRG.153708.1	NONGGAT014506.1	89.88	1.01	noncode	258	50	257	22	3	3	258	1038	1291	6e-88	327
MSTRG.153708.1	NONGGAT012006.2	89.8	0.99	noncode	258	50	255	25	1	1	254	1341	1087	2e-87	326
MSTRG.153708.1	NONGGAT012006.2	89.8	0.99	noncode	258	50	255	25	1	1	254	4964	4710	2e-87	326
MSTRG.153708.1	NONGGAT012006.2	89.8	0.99	noncode	258	50	255	25	1	1	254	8718	8464	2e-87	326
MSTRG.153708.1	NONGGAT012006.2	89.8	0.99	noncode	258	50	255	25	1	1	254	1341	1087	2e-87	326
MSTRG.153708.1	NONGGAT012006.2	89.8	0.99	noncode	258	50	255	25	1	1	254	4964	4710	2e-87	326
MSTRG.153708.1	NONGGAT012006.2	89.8	0.99	noncode	258	50	255	25	1	1	254	8718	8464	2e-87	326
MSTRG.153708.1	NONGGAT012967.1	92.41	0.87	noncode	258	50	224	16	1	1	223	264	41	3e-85	318
MSTRG.153708.1	NONGGAT012967.1	92.41	0.87	noncode	258	50	224	16	1	1	223	264	41	3e-85	318
MSTRG.153708.1	NONGGAT016668.1	91.96	0.87	noncode	258	50	224	17	1	1	223	99	322	2e-83	313
MSTRG.153708.1	NONGGAT016668.1	91.96	0.87	noncode	258	50	224	17	1	1	223	99	322	2e-83	313
MSTRG.153708.1	NONGGAT009068.2	90.04	0.94	noncode	258	50	241	21	2	1	240	442	680	2e-82	309
MSTRG.153708.1	NONGGAT009068.2	90.04	0.94	noncode	258	50	241	21	2	1	240	442	680	2e-82	309
MSTRG.103037.1	NONGGAT016647.1	91.04	1	noncode	212	50	212	19	0	1	212	787	576	8e-76	287
MSTRG.103037.1	NONGGAT012962.1	91.04	1	noncode	212	50	212	19	0	1	212	3711	3500	8e-76	287
MSTRG.103037.1	NONGGAT016647.1	91.04	1	noncode	212	50	212	19	0	1	212	787	576	8e-76	287
MSTRG.103037.1	NONGGAT012962.1	91.04	1	noncode	212	50	212	19	0	1	212	3711	3500	8e-76	287
MSTRG.103037.1	NONGGAT001769.2	90.09	1.01	noncode	212	50	212	19	2	1	212	947	1156	6e-72	274
MSTRG.103037.1	NONGGAT001769.2	90.09	1.01	noncode	212	50	212	19	2	1	212	947	1156	6e-72	274
MSTRG.103037.1	NONGGAT013012.1	89.62	1	noncode	212	50	212	22	0	1	212	2705	2916	8e-71	270
MSTRG.103037.1	NONGGAT012413.1	89.62	1	noncode	212	50	212	22	0	1	212	2548	2337	8e-71	270
MSTRG.103037.1	NONGGAT013012.1	89.62	1	noncode	212	50	212	22	0	1	212	2705	2916	8e-71	270
MSTRG.103037.1	NONGGAT012413.1	89.62	1	noncode	212	50	212	22	0	1	212	2548	2337	8e-71	270
MSTRG.103037.1	NONGGAT014535.1	89.62	1.01	noncode	212	50	212	20	2	1	212	1321	1530	3e-70	268
MSTRG.103037.1	NONGGAT014020.1	89.62	1.01	noncode	212	50	212	20	2	1	212	2144	1935	3e-70	268
MSTRG.103037.1	NONGGAT012967.1	89.57	1	noncode	212	50	211	22	0	2	212	41	251	3e-70	268
MSTRG.103037.1	NONGGAT014535.1	89.62	1.01	noncode	212	50	212	20	2	1	212	1321	1530	3e-70	268
MSTRG.103037.1	NONGGAT014020.1	89.62	1.01	noncode	212	50	212	20	2	1	212	2144	1935	3e-70	268
MSTRG.103037.1	NONGGAT012967.1	89.57	1	noncode	212	50	211	22	0	2	212	41	251	3e-70	268
MSTRG.103037.1	NONGGAT016648.1	92.02	0.89	noncode	212	50	188	15	0	1	188	507	320	4e-69	265
MSTRG.103037.1	NONGGAT014129.1	92.43	0.87	noncode	212	50	185	14	0	28	212	1	185	4e-69	265
MSTRG.103037.1	NONGGAT016648.1	92.02	0.89	noncode	212	50	188	15	0	1	188	507	320	4e-69	265
MSTRG.103037.1	NONGGAT014129.1	92.43	0.87	noncode	212	50	185	14	0	28	212	1	185	4e-69	265
MSTRG.103037.1	NONGGAT012594.1	88.63	1	noncode	212	50	211	24	0	2	212	953	743	6e-67	257
MSTRG.103037.1	NONGGAT012594.1	88.63	1	noncode	212	50	211	24	0	2	212	953	743	6e-67	257
MSTRG.103037.1	NONGGAT012006.2	88.21	1	noncode	212	50	212	25	0	1	212	1117	1328	8e-66	254
MSTRG.103037.1	NONGGAT012006.2	88.21	1	noncode	212	50	212	25	0	1	212	4740	4951	8e-66	254
MSTRG.103037.1	NONGGAT012006.2	88.21	1	noncode	212	50	212	25	0	1	212	8494	8705	8e-66	254
MSTRG.103037.1	NONGGAT012006.2	88.21	1	noncode	212	50	212	25	0	1	212	1117	1328	8e-66	254
MSTRG.103037.1	NONGGAT012006.2	88.21	1	noncode	212	50	212	25	0	1	212	4740	4951	8e-66	254
MSTRG.103037.1	NONGGAT012006.2	88.21	1	noncode	212	50	212	25	0	1	212	8494	8705	8e-66	254
MSTRG.103037.1	NONGGAT014911.1	91.71	0.85	noncode	212	50	181	15	0	27	207	2168	1988	3e-65	252
MSTRG.103037.1	NONGGAT014911.1	91.71	0.85	noncode	212	50	181	15	0	27	207	2168	1988	3e-65	252
MSTRG.103037.1	NONGGAT016668.1	87.56	0.99	noncode	212	50	209	26	0	2	210	322	114	2e-62	243
MSTRG.103037.1	NONGGAT016668.1	87.56	0.99	noncode	212	50	209	26	0	2	210	322	114	2e-62	243
MSTRG.103037.1	NONGGAT009068.2	86.85	1.02	noncode	212	50	213	24	3	1	212	664	455	3e-60	235
MSTRG.103037.1	NONGGAT009068.2	86.85	1.02	noncode	212	50	213	24	3	1	212	664	455	3e-60	235
MSTRG.103037.1	NONGGAT013049.1	88.95	0.9	noncode	212	50	190	20	1	24	212	1335	1146	1e-59	233
MSTRG.103037.1	NONGGAT013049.1	88.95	0.9	noncode	212	50	190	20	1	24	212	1335	1146	1e-59	233
MSTRG.103037.1	NONGGAT003141.2	87.91	0.88	noncode	212	50	182	18	4	32	212	81	259	5e-53	211
MSTRG.103037.1	NONGGAT003140.2	87.91	0.88	noncode	212	50	182	18	4	32	212	81	259	5e-53	211
MSTRG.103037.1	NONGGAT003139.2	87.91	0.88	noncode	212	50	182	18	4	32	212	81	259	5e-53	211
MSTRG.103037.1	NONGGAT003141.2	87.91	0.88	noncode	212	50	182	18	4	32	212	81	259	5e-53	211
MSTRG.103037.1	NONGGAT003140.2	87.91	0.88	noncode	212	50	182	18	4	32	212	81	259	5e-53	211
MSTRG.103037.1	NONGGAT003139.2	87.91	0.88	noncode	212	50	182	18	4	32	212	81	259	5e-53	211
MSTRG.40879.1	NONGGAT002930.2	100	1	noncode	284	50	284	0	0	1	284	607	890	2e-147	525
MSTRG.40879.1	NONGGAT002930.2	100	1	noncode	284	50	284	0	0	1	284	607	890	2e-147	525
MSTRG.45496.1	NONGGAT003391.2	100	1	noncode	297	50	297	0	0	1	297	56	352	1e-154	549
MSTRG.45496.1	NONGGAT003390.2	100	1	noncode	297	50	297	0	0	1	297	190	486	1e-154	549
MSTRG.45496.1	NONGGAT003391.2	100	1	noncode	297	50	297	0	0	1	297	56	352	1e-154	549
MSTRG.45496.1	NONGGAT003390.2	100	1	noncode	297	50	297	0	0	1	297	190	486	1e-154	549
MSTRG.19980.1	NONGGAT014020.1	94.51	1.01	noncode	255	50	255	12	2	1	255	1924	2176	2e-107	392
MSTRG.19980.1	NONGGAT014020.1	94.51	1.01	noncode	255	50	255	12	2	1	255	1924	2176	2e-107	392
MSTRG.19980.1	NONGGAT016647.1	94.05	0.99	noncode	255	50	252	15	0	4	255	568	819	1e-104	383
MSTRG.19980.1	NONGGAT016647.1	94.05	0.99	noncode	255	50	252	15	0	4	255	568	819	1e-104	383
MSTRG.19980.1	NONGGAT014535.1	93.75	1.02	noncode	255	50	256	12	4	1	255	1541	1289	4e-104	381
MSTRG.19980.1	NONGGAT014535.1	93.75	1.02	noncode	255	50	256	12	4	1	255	1541	1289	4e-104	381
MSTRG.19980.1	NONGGAT013012.1	93.28	0.99	noncode	255	50	253	17	0	1	253	2927	2675	7e-102	374
MSTRG.19980.1	NONGGAT013012.1	93.28	0.99	noncode	255	50	253	17	0	1	253	2927	2675	7e-102	374
MSTRG.19980.1	NONGGAT012413.1	93.17	0.98	noncode	255	50	249	17	0	1	249	2326	2574	1e-99	366
MSTRG.19980.1	NONGGAT012413.1	93.17	0.98	noncode	255	50	249	17	0	1	249	2326	2574	1e-99	366
MSTRG.19980.1	NONGGAT001309.2	92.83	0.99	noncode	255	50	251	16	2	6	255	3183	3432	2e-98	363
MSTRG.19980.1	NONGGAT001309.2	92.83	0.99	noncode	255	50	251	16	2	6	255	3183	3432	2e-98	363
MSTRG.19980.1	NONGGAT016648.1	95.02	0.87	noncode	255	50	221	11	0	35	255	319	539	4e-94	348
MSTRG.19980.1	NONGGAT013979.1	91.37	1	noncode	255	50	255	21	1	1	255	1854	1601	4e-94	348
MSTRG.19980.1	NONGGAT016648.1	95.02	0.87	noncode	255	50	221	11	0	35	255	319	539	4e-94	348
MSTRG.19980.1	NONGGAT013979.1	91.37	1	noncode	255	50	255	21	1	1	255	1854	1601	4e-94	348
MSTRG.19980.1	NONGGAT012594.1	92.28	0.98	noncode	255	50	246	15	3	12	255	743	986	2e-93	346
MSTRG.19980.1	NONGGAT002514.2	92.24	0.96	noncode	255	50	245	18	1	11	255	399	156	2e-93	346
MSTRG.19980.1	NONGGAT001769.2	92.89	0.94	noncode	255	50	239	15	2	1	239	1167	931	2e-93	346
MSTRG.19980.1	NONGGAT012594.1	92.28	0.98	noncode	255	50	246	15	3	12	255	743	986	2e-93	346
MSTRG.19980.1	NONGGAT002514.2	92.24	0.96	noncode	255	50	245	18	1	11	255	399	156	2e-93	346
MSTRG.19980.1	NONGGAT001769.2	92.89	0.94	noncode	255	50	239	15	2	1	239	1167	931	2e-93	346
MSTRG.19980.1	NONGGAT014506.1	90.23	1.02	noncode	255	50	256	20	4	1	255	1038	1289	2e-88	329
MSTRG.19980.1	NONGGAT014506.1	90.23	1.02	noncode	255	50	256	20	4	1	255	1038	1289	2e-88	329
MSTRG.19980.1	NONGGAT012967.1	92.79	0.87	noncode	255	50	222	16	0	1	222	262	41	3e-86	322
MSTRG.19980.1	NONGGAT012967.1	92.79	0.87	noncode	255	50	222	16	0	1	222	262	41	3e-86	322
MSTRG.19980.1	NONGGAT012962.1	89.37	1	noncode	255	50	254	25	2	3	255	3491	3743	3e-85	318
MSTRG.19980.1	NONGGAT012962.1	89.37	1	noncode	255	50	254	25	2	3	255	3491	3743	3e-85	318
MSTRG.19980.1	NONGGAT016668.1	92.34	0.87	noncode	255	50	222	17	0	1	222	101	322	1e-84	316
MSTRG.19980.1	NONGGAT016668.1	92.34	0.87	noncode	255	50	222	17	0	1	222	101	322	1e-84	316
MSTRG.19980.1	NONGGAT009068.2	89.96	0.96	noncode	255	50	239	18	5	3	239	446	680	9e-81	303
MSTRG.19980.1	NONGGAT009068.2	89.96	0.96	noncode	255	50	239	18	5	3	239	446	680	9e-81	303
MSTRG.144148.1	NONGGAT010799.2	88.56	0.82	noncode	331	50	271	31	0	61	331	454	184	2e-88	329
MSTRG.144148.1	NONGGAT010799.2	88.56	0.82	noncode	331	50	271	31	0	61	331	454	184	2e-88	329
MSTRG.14639.1	NONGGAT016647.1	93.28	1.01	noncode	268	50	268	15	2	2	267	570	836	2e-107	392
MSTRG.14639.1	NONGGAT016647.1	93.28	1.01	noncode	268	50	268	15	2	2	267	570	836	2e-107	392
MSTRG.14639.1	NONGGAT014020.1	92.19	1.02	noncode	268	50	269	16	5	2	268	1929	2194	2e-102	375
MSTRG.14639.1	NONGGAT014020.1	92.19	1.02	noncode	268	50	269	16	5	2	268	1929	2194	2e-102	375
MSTRG.14639.1	NONGGAT001309.2	91.51	1.03	noncode	268	50	271	18	4	1	268	3182	3450	3e-100	368
MSTRG.14639.1	NONGGAT001309.2	91.51	1.03	noncode	268	50	271	18	4	1	268	3182	3450	3e-100	368
MSTRG.14639.1	NONGGAT013012.1	91.95	0.98	noncode	268	50	261	18	3	2	260	2922	2663	2e-98	363
MSTRG.14639.1	NONGGAT013012.1	91.95	0.98	noncode	268	50	261	18	3	2	260	2922	2663	2e-98	363
MSTRG.14639.1	NONGGAT014535.1	91.11	1.03	noncode	268	50	270	17	6	2	268	1536	1271	2e-97	359
MSTRG.14639.1	NONGGAT014535.1	91.11	1.03	noncode	268	50	270	17	6	2	268	1536	1271	2e-97	359
MSTRG.14639.1	NONGGAT012413.1	90.71	1.02	noncode	268	50	269	22	3	2	268	2331	2598	3e-96	355
MSTRG.14639.1	NONGGAT012413.1	90.71	1.02	noncode	268	50	269	22	3	2	268	2331	2598	3e-96	355
MSTRG.14639.1	NONGGAT012962.1	90.67	1.01	noncode	268	50	268	22	3	3	268	3495	3761	1e-95	353
MSTRG.14639.1	NONGGAT012962.1	90.67	1.01	noncode	268	50	268	22	3	3	268	3495	3761	1e-95	353
MSTRG.14639.1	NONGGAT016648.1	94.35	0.86	noncode	268	50	230	10	2	40	267	328	556	1e-94	350
MSTRG.14639.1	NONGGAT016648.1	94.35	0.86	noncode	268	50	230	10	2	40	267	328	556	1e-94	350
MSTRG.14639.1	NONGGAT013979.1	90.3	1.01	noncode	268	50	268	22	3	2	267	1849	1584	4e-94	348
MSTRG.14639.1	NONGGAT013979.1	90.3	1.01	noncode	268	50	268	22	3	2	267	1849	1584	4e-94	348
MSTRG.14639.1	NONGGAT012594.1	89.63	1.02	noncode	268	50	270	25	2	1	268	736	1004	7e-92	340
MSTRG.14639.1	NONGGAT012594.1	89.63	1.02	noncode	268	50	270	25	2	1	268	736	1004	7e-92	340
MSTRG.14639.1	NONGGAT001769.2	92.8	0.9	noncode	268	50	236	12	5	1	234	1163	931	1e-90	337
MSTRG.14639.1	NONGGAT001769.2	92.8	0.9	noncode	268	50	236	12	5	1	234	1163	931	1e-90	337
MSTRG.14639.1	NONGGAT012006.2	88.35	1	noncode	268	50	266	27	3	5	268	1331	1068	1e-84	316
MSTRG.14639.1	NONGGAT012006.2	88.35	1	noncode	268	50	266	27	3	5	268	4954	4691	1e-84	316
MSTRG.14639.1	NONGGAT012006.2	88.35	1	noncode	268	50	266	27	3	5	268	8708	8445	1e-84	316
MSTRG.14639.1	NONGGAT012006.2	88.35	1	noncode	268	50	266	27	3	5	268	1331	1068	1e-84	316
MSTRG.14639.1	NONGGAT012006.2	88.35	1	noncode	268	50	266	27	3	5	268	4954	4691	1e-84	316
MSTRG.14639.1	NONGGAT012006.2	88.35	1	noncode	268	50	266	27	3	5	268	8708	8445	1e-84	316
MSTRG.14639.1	NONGGAT012967.1	93.02	0.81	noncode	268	50	215	14	1	5	219	254	41	2e-83	313
MSTRG.14639.1	NONGGAT012967.1	93.02	0.81	noncode	268	50	215	14	1	5	219	254	41	2e-83	313
MSTRG.14639.1	NONGGAT014506.1	87.97	1	noncode	268	50	266	26	3	2	265	1043	1304	2e-82	309
MSTRG.14639.1	NONGGAT014506.1	87.97	1	noncode	268	50	266	26	3	2	265	1043	1304	2e-82	309
MSTRG.14639.1	NONGGAT016668.1	92.2	0.82	noncode	268	50	218	16	1	2	219	106	322	8e-82	307
MSTRG.14639.1	NONGGAT016668.1	92.2	0.82	noncode	268	50	218	16	1	2	219	106	322	8e-82	307
MSTRG.14639.1	NONGGAT009068.2	89.41	0.9	noncode	268	50	236	18	6	2	234	449	680	8e-77	291
MSTRG.14639.1	NONGGAT009068.2	89.41	0.9	noncode	268	50	236	18	6	2	234	449	680	8e-77	291
MSTRG.143622.1	NONGGAT010366.2	92.21	0.98	noncode	555	50	539	38	4	19	555	22	558	0	760
MSTRG.143622.1	NONGGAT010366.2	92.21	0.98	noncode	555	50	539	38	4	19	555	22	558	0	760
MSTRG.52124.12	NONGGAT013776.1	100	0.81	noncode	791	50	637	0	0	155	791	257	893	0	1177
MSTRG.52124.12	NONGGAT013773.1	100	0.81	noncode	791	50	637	0	0	155	791	257	893	0	1177
MSTRG.52124.12	NONGGAT013770.1	100	0.81	noncode	791	50	637	0	0	155	791	257	893	0	1177
MSTRG.52124.12	NONGGAT013776.1	100	0.81	noncode	791	50	637	0	0	155	791	257	893	0	1177
MSTRG.52124.12	NONGGAT013773.1	100	0.81	noncode	791	50	637	0	0	155	791	257	893	0	1177
MSTRG.52124.12	NONGGAT013770.1	100	0.81	noncode	791	50	637	0	0	155	791	257	893	0	1177
MSTRG.52124.12	NONGGAT013777.1	97.49	0.81	noncode	791	50	637	0	1	155	791	257	877	0	1074
MSTRG.52124.12	NONGGAT013774.1	97.49	0.81	noncode	791	50	637	0	1	155	791	257	877	0	1074
MSTRG.52124.12	NONGGAT013771.1	97.49	0.81	noncode	791	50	637	0	1	155	791	257	877	0	1074
MSTRG.52124.12	NONGGAT013777.1	97.49	0.81	noncode	791	50	637	0	1	155	791	257	877	0	1074
MSTRG.52124.12	NONGGAT013774.1	97.49	0.81	noncode	791	50	637	0	1	155	791	257	877	0	1074
MSTRG.52124.12	NONGGAT013771.1	97.49	0.81	noncode	791	50	637	0	1	155	791	257	877	0	1074
MSTRG.41813.1	NONGGAT003027.2	100	0.99	noncode	264	50	262	0	0	3	264	1	262	3e-135	484
MSTRG.41813.1	NONGGAT003027.2	100	0.99	noncode	264	50	262	0	0	3	264	1	262	3e-135	484
MSTRG.98945.1	NONGGAT006654.2	100	0.83	noncode	312	50	258	0	0	26	283	1	258	6e-133	477
MSTRG.98945.1	NONGGAT006654.2	100	0.83	noncode	312	50	258	0	0	26	283	1	258	6e-133	477
MSTRG.118103.9	NONGGAT007585.2	99.73	1	noncode	9185	50	9185	0	1	1	9185	42	9201	0	16800
MSTRG.118103.9	NONGGAT007585.2	99.73	1	noncode	9185	50	9185	0	1	1	9185	42	9201	0	16800
MSTRG.56228.6	NONGGAT004059.2	100	0.91	noncode	714	50	649	0	0	66	714	596	1244	0	1199
MSTRG.56228.6	NONGGAT004059.2	100	0.91	noncode	714	50	649	0	0	66	714	596	1244	0	1199
MSTRG.14688.1	NONGGAT001188.2	95.79	1	noncode	214	50	214	9	0	1	214	221	434	1e-93	346
MSTRG.14688.1	NONGGAT001188.2	95.79	1	noncode	214	50	214	9	0	1	214	221	434	1e-93	346
MSTRG.14688.1	NONGGAT012480.1	94.84	1	noncode	214	50	213	9	1	4	214	1124	912	3e-89	331
MSTRG.14688.1	NONGGAT005571.2	94.86	1.01	noncode	214	50	214	7	2	1	214	761	970	3e-89	331
MSTRG.14688.1	NONGGAT005569.2	94.86	1.01	noncode	214	50	214	7	2	1	214	761	970	3e-89	331
MSTRG.14688.1	NONGGAT012480.1	94.84	1	noncode	214	50	213	9	1	4	214	1124	912	3e-89	331
MSTRG.14688.1	NONGGAT005571.2	94.86	1.01	noncode	214	50	214	7	2	1	214	761	970	3e-89	331
MSTRG.14688.1	NONGGAT005569.2	94.86	1.01	noncode	214	50	214	7	2	1	214	761	970	3e-89	331
MSTRG.14688.1	NONGGAT014780.1	94.39	1	noncode	214	50	214	12	0	1	214	727	940	1e-88	329
MSTRG.14688.1	NONGGAT014780.1	94.39	1	noncode	214	50	214	12	0	1	214	727	940	1e-88	329
MSTRG.16989.1	NONGGAT016647.1	92.11	1	noncode	317	50	317	24	1	1	317	975	660	2e-123	446
MSTRG.16989.1	NONGGAT016647.1	92.11	1	noncode	317	50	317	24	1	1	317	975	660	2e-123	446
MSTRG.16989.1	NONGGAT012962.1	89.91	1	noncode	317	50	317	31	1	1	317	3899	3584	9e-112	407
MSTRG.16989.1	NONGGAT012962.1	89.91	1	noncode	317	50	317	31	1	1	317	3899	3584	9e-112	407
MSTRG.16989.1	NONGGAT012594.1	89.59	1.01	noncode	317	50	317	30	2	1	317	1140	827	1e-109	399
MSTRG.16989.1	NONGGAT012594.1	89.59	1.01	noncode	317	50	317	30	2	1	317	1140	827	1e-109	399
MSTRG.16989.1	NONGGAT002514.2	89.27	1.01	noncode	317	50	317	32	2	1	317	1	315	2e-108	396
MSTRG.16989.1	NONGGAT002514.2	89.27	1.01	noncode	317	50	317	32	2	1	317	1	315	2e-108	396
MSTRG.16989.1	NONGGAT012006.2	88.64	1.01	noncode	317	50	317	34	2	1	317	930	1244	4e-105	385
MSTRG.16989.1	NONGGAT012006.2	88.64	1.01	noncode	317	50	317	34	2	1	317	8307	8621	4e-105	385
MSTRG.16989.1	NONGGAT012006.2	88.33	1.01	noncode	317	50	317	35	2	1	317	4553	4867	2e-103	379
MSTRG.16989.1	NONGGAT012006.2	88.64	1.01	noncode	317	50	317	34	2	1	317	930	1244	4e-105	385
MSTRG.16989.1	NONGGAT012006.2	88.64	1.01	noncode	317	50	317	34	2	1	317	8307	8621	4e-105	385
MSTRG.16989.1	NONGGAT012006.2	88.33	1.01	noncode	317	50	317	35	2	1	317	4553	4867	2e-103	379
MSTRG.16989.1	NONGGAT014020.1	89.05	0.9	noncode	317	50	283	29	2	35	317	2298	2018	1e-94	350
MSTRG.16989.1	NONGGAT014020.1	89.05	0.9	noncode	317	50	283	29	2	35	317	2298	2018	1e-94	350
MSTRG.16989.1	NONGGAT014506.1	87.06	0.82	noncode	317	50	255	27	5	58	311	1388	1139	2e-74	283
MSTRG.16989.1	NONGGAT014506.1	87.06	0.82	noncode	317	50	255	27	5	58	311	1388	1139	2e-74	283
MSTRG.2603.2	NONGGAT000198.2	100	0.99	noncode	923	50	915	0	0	1	915	1001	1915	0	1690
MSTRG.2603.2	NONGGAT000198.2	100	0.99	noncode	923	50	915	0	0	1	915	1001	1915	0	1690
MSTRG.93460.1	NONGGAT012480.1	91.01	0.99	noncode	452	50	445	37	2	4	445	1190	746	7e-169	597
MSTRG.93460.1	NONGGAT012480.1	91.01	0.99	noncode	452	50	445	37	2	4	445	1190	746	7e-169	597
MSTRG.93460.1	NONGGAT001188.2	94.05	0.82	noncode	452	50	370	21	1	1	369	154	523	9e-158	560
MSTRG.93460.1	NONGGAT001188.2	94.05	0.82	noncode	452	50	370	21	1	1	369	154	523	9e-158	560
MSTRG.93460.1	NONGGAT005571.2	90.59	0.9	noncode	452	50	404	34	2	1	404	695	1094	2e-149	532
MSTRG.93460.1	NONGGAT005569.2	90.59	0.9	noncode	452	50	404	34	2	1	404	695	1094	2e-149	532
MSTRG.93460.1	NONGGAT005571.2	90.59	0.9	noncode	452	50	404	34	2	1	404	695	1094	2e-149	532
MSTRG.93460.1	NONGGAT005569.2	90.59	0.9	noncode	452	50	404	34	2	1	404	695	1094	2e-149	532
MSTRG.123494.1	NONGGAT014020.1	95.22	1	noncode	210	50	209	10	0	1	209	2150	1942	3e-89	331
MSTRG.123494.1	NONGGAT014020.1	95.22	1	noncode	210	50	209	10	0	1	209	2150	1942	3e-89	331
MSTRG.123494.1	NONGGAT014535.1	94.31	1.01	noncode	210	50	211	10	2	1	210	1315	1524	2e-86	322
MSTRG.123494.1	NONGGAT014535.1	94.31	1.01	noncode	210	50	211	10	2	1	210	1315	1524	2e-86	322
MSTRG.123494.1	NONGGAT001769.2	90.91	1	noncode	210	50	209	17	2	3	210	943	1150	1e-73	279
MSTRG.123494.1	NONGGAT001769.2	90.91	1	noncode	210	50	209	17	2	3	210	943	1150	1e-73	279
MSTRG.123494.1	NONGGAT016647.1	89.62	1.02	noncode	210	50	212	20	2	1	210	793	582	3e-70	268
MSTRG.123494.1	NONGGAT016647.1	89.62	1.02	noncode	210	50	212	20	2	1	210	793	582	3e-70	268
MSTRG.123494.1	NONGGAT002514.2	89.1	1.01	noncode	210	50	211	22	1	1	210	182	392	5e-68	261
MSTRG.123494.1	NONGGAT002514.2	89.1	1.01	noncode	210	50	211	22	1	1	210	182	392	5e-68	261
MSTRG.123494.1	NONGGAT016648.1	91.15	0.92	noncode	210	50	192	15	2	1	190	513	322	2e-67	259
MSTRG.123494.1	NONGGAT016648.1	91.15	0.92	noncode	210	50	192	15	2	1	190	513	322	2e-67	259
MSTRG.123494.1	NONGGAT009068.2	89.05	1.01	noncode	210	50	210	19	2	3	210	668	461	6e-67	257
MSTRG.123494.1	NONGGAT009068.2	89.05	1.01	noncode	210	50	210	19	2	3	210	668	461	6e-67	257
MSTRG.123494.1	NONGGAT012967.1	89.32	1	noncode	210	50	206	18	4	8	210	41	245	2e-66	255
MSTRG.123494.1	NONGGAT012967.1	89.32	1	noncode	210	50	206	18	4	8	210	41	245	2e-66	255
MSTRG.123494.1	NONGGAT013012.1	88.89	1	noncode	210	50	207	21	2	1	205	2699	2905	8e-66	254
MSTRG.123494.1	NONGGAT012413.1	88.57	1.01	noncode	210	50	210	22	2	3	210	2552	2343	8e-66	254
MSTRG.123494.1	NONGGAT013012.1	88.89	1	noncode	210	50	207	21	2	1	205	2699	2905	8e-66	254
MSTRG.123494.1	NONGGAT012413.1	88.57	1.01	noncode	210	50	210	22	2	3	210	2552	2343	8e-66	254
MSTRG.123494.1	NONGGAT001309.2	88.21	1.02	noncode	210	50	212	23	2	1	210	3406	3195	3e-65	252
MSTRG.123494.1	NONGGAT001309.2	88.21	1.02	noncode	210	50	212	23	2	1	210	3406	3195	3e-65	252
MSTRG.123494.1	NONGGAT012594.1	87.85	1.05	noncode	210	50	214	20	6	1	210	960	749	1e-63	246
MSTRG.123494.1	NONGGAT012594.1	87.85	1.05	noncode	210	50	214	20	6	1	210	960	749	1e-63	246
MSTRG.123494.1	NONGGAT014129.1	91.95	0.84	noncode	210	50	174	12	2	34	205	1	174	2e-62	243
MSTRG.123494.1	NONGGAT014129.1	91.95	0.84	noncode	210	50	174	12	2	34	205	1	174	2e-62	243
MSTRG.123494.1	NONGGAT016668.1	87.75	0.98	noncode	210	50	204	23	2	8	209	322	119	8e-61	237
MSTRG.123494.1	NONGGAT016668.1	87.75	0.98	noncode	210	50	204	23	2	8	209	322	119	8e-61	237
MSTRG.123494.1	NONGGAT014506.1	90.34	0.84	noncode	210	50	176	15	1	1	176	1263	1090	1e-58	230
MSTRG.123494.1	NONGGAT014506.1	90.34	0.84	noncode	210	50	176	15	1	1	176	1263	1090	1e-58	230
MSTRG.123494.1	NONGGAT014911.1	89.44	0.87	noncode	210	50	180	17	2	33	210	2168	1989	2e-57	226
MSTRG.123494.1	NONGGAT014911.1	89.44	0.87	noncode	210	50	180	17	2	33	210	2168	1989	2e-57	226
MSTRG.123494.1	NONGGAT016115.1	90.17	0.84	noncode	210	50	173	14	3	29	198	170	342	2e-56	222
MSTRG.123494.1	NONGGAT016115.1	90.17	0.84	noncode	210	50	173	14	3	29	198	170	342	2e-56	222
MSTRG.123494.1	NONGGAT013049.1	88.59	0.89	noncode	210	50	184	18	3	30	210	1335	1152	8e-56	220
MSTRG.123494.1	NONGGAT013049.1	88.59	0.89	noncode	210	50	184	18	3	30	210	1335	1152	8e-56	220
MSTRG.123494.1	NONGGAT012962.1	84.21	1	noncode	210	50	209	31	2	4	210	3714	3506	3e-50	202
MSTRG.123494.1	NONGGAT012962.1	84.21	1	noncode	210	50	209	31	2	4	210	3714	3506	3e-50	202
MSTRG.144350.1	NONGGAT010154.2	97.49	1	noncode	279	50	279	7	0	1	279	113	391	6e-133	477
MSTRG.144350.1	NONGGAT010154.2	92.5	1.01	noncode	279	50	280	16	3	1	279	440	715	2e-108	396
MSTRG.144350.1	NONGGAT010154.2	88.93	1.02	noncode	279	50	280	26	4	1	279	223	498	8e-92	340
MSTRG.144350.1	NONGGAT010154.2	88.49	1.01	noncode	279	50	278	27	3	1	277	6	279	5e-89	331
MSTRG.144350.1	NONGGAT010154.2	84.95	1.03	noncode	279	50	279	32	7	1	277	333	603	8e-72	274
MSTRG.144350.1	NONGGAT010154.2	97.49	1	noncode	279	50	279	7	0	1	279	113	391	6e-133	477
MSTRG.144350.1	NONGGAT010154.2	92.5	1.01	noncode	279	50	280	16	3	1	279	440	715	2e-108	396
MSTRG.144350.1	NONGGAT010154.2	88.93	1.02	noncode	279	50	280	26	4	1	279	223	498	8e-92	340
MSTRG.144350.1	NONGGAT010154.2	88.49	1.01	noncode	279	50	278	27	3	1	277	6	279	5e-89	331
MSTRG.144350.1	NONGGAT010154.2	84.95	1.03	noncode	279	50	279	32	7	1	277	333	603	8e-72	274
MSTRG.144350.1	NONGGAT010153.2	93.09	1	noncode	279	50	275	14	3	6	279	530	260	5e-109	398
MSTRG.144350.1	NONGGAT010153.2	91.37	1.01	noncode	279	50	278	19	4	1	277	862	589	2e-102	375
MSTRG.144350.1	NONGGAT010153.2	90.71	1.01	noncode	279	50	280	21	3	1	279	752	477	4e-100	368
MSTRG.144350.1	NONGGAT010153.2	89.64	1.01	noncode	279	50	280	24	3	1	279	969	694	4e-95	351
MSTRG.144350.1	NONGGAT010153.2	93.09	1	noncode	279	50	275	14	3	6	279	530	260	5e-109	398
MSTRG.144350.1	NONGGAT010153.2	91.37	1.01	noncode	279	50	278	19	4	1	277	862	589	2e-102	375
MSTRG.144350.1	NONGGAT010153.2	90.71	1.01	noncode	279	50	280	21	3	1	279	752	477	4e-100	368
MSTRG.144350.1	NONGGAT010153.2	89.64	1.01	noncode	279	50	280	24	3	1	279	969	694	4e-95	351
MSTRG.138687.1	NONGGAT009005.2	100	1	noncode	208	50	208	0	0	1	208	289	496	3e-105	385
MSTRG.138687.1	NONGGAT009005.2	100	1	noncode	208	50	208	0	0	1	208	289	496	3e-105	385
MSTRG.23194.1	NONGGAT001534.2	100	1	noncode	205	50	205	0	0	1	205	83	287	1e-103	379
MSTRG.23194.1	NONGGAT001534.2	100	1	noncode	205	50	205	0	0	1	205	83	287	1e-103	379
MSTRG.112673.1	NONGGAT007254.2	100	0.86	noncode	707	50	606	0	0	102	707	1	606	0	1120
MSTRG.112673.1	NONGGAT007254.2	100	0.86	noncode	707	50	606	0	0	102	707	1	606	0	1120
MSTRG.64599.1	NONGGAT001188.2	94.1	1	noncode	427	50	424	24	1	5	427	1	424	0	643
MSTRG.64599.1	NONGGAT001188.2	94.1	1	noncode	427	50	424	24	1	5	427	1	424	0	643
MSTRG.64599.1	NONGGAT012480.1	91.57	1.01	noncode	427	50	427	29	3	3	427	1343	922	2e-164	582
MSTRG.64599.1	NONGGAT012480.1	91.57	1.01	noncode	427	50	427	29	3	3	427	1343	922	2e-164	582
MSTRG.100527.1	NONGGAT006712.2	100	1	noncode	2441	50	2435	0	0	7	2441	1	2435	0	4497
MSTRG.100527.1	NONGGAT006712.2	100	1	noncode	2441	50	2435	0	0	7	2441	1	2435	0	4497
MSTRG.96417.1	NONGGAT013298.1	84.86	0.99	noncode	223	50	218	28	3	5	221	1470	1683	4e-54	215
MSTRG.96417.1	NONGGAT013298.1	84.86	0.99	noncode	223	50	218	28	3	5	221	1470	1683	4e-54	215
MSTRG.95931.1	NONGGAT014020.1	95.15	0.99	noncode	229	50	227	11	0	1	227	1956	2182	2e-97	359
MSTRG.95931.1	NONGGAT014020.1	95.15	0.99	noncode	229	50	227	11	0	1	227	1956	2182	2e-97	359
MSTRG.95931.1	NONGGAT014535.1	93.86	1	noncode	229	50	228	12	2	1	227	1509	1283	2e-92	342
MSTRG.95931.1	NONGGAT014535.1	93.86	1	noncode	229	50	228	12	2	1	227	1509	1283	2e-92	342
MSTRG.95931.1	NONGGAT016647.1	92.64	1.02	noncode	229	50	231	15	2	1	229	597	827	4e-89	331
MSTRG.95931.1	NONGGAT016647.1	92.64	1.02	noncode	229	50	231	15	2	1	229	597	827	4e-89	331
MSTRG.95931.1	NONGGAT016648.1	92.92	1	noncode	229	50	226	14	2	6	229	322	547	5e-88	327
MSTRG.95931.1	NONGGAT016648.1	92.92	1	noncode	229	50	226	14	2	6	229	322	547	5e-88	327
MSTRG.95931.1	NONGGAT001309.2	93.4	0.93	noncode	229	50	212	13	1	19	229	3229	3440	1e-83	313
MSTRG.95931.1	NONGGAT001309.2	93.4	0.93	noncode	229	50	212	13	1	19	229	3229	3440	1e-83	313
MSTRG.95931.1	NONGGAT012594.1	92.27	0.97	noncode	229	50	220	15	2	12	229	775	994	5e-83	311
MSTRG.95931.1	NONGGAT012594.1	92.27	0.97	noncode	229	50	220	15	2	12	229	775	994	5e-83	311
MSTRG.95931.1	NONGGAT002514.2	90.87	1.01	noncode	229	50	230	20	1	1	229	377	148	6e-82	307
MSTRG.95931.1	NONGGAT002514.2	90.87	1.01	noncode	229	50	230	20	1	1	229	377	148	6e-82	307
MSTRG.95931.1	NONGGAT014506.1	92.38	0.92	noncode	229	50	210	14	1	20	229	1090	1297	4e-79	298
MSTRG.95931.1	NONGGAT014506.1	92.38	0.92	noncode	229	50	210	14	1	20	229	1090	1297	4e-79	298
MSTRG.95931.1	NONGGAT012413.1	90.27	1	noncode	229	50	226	20	2	6	229	2363	2588	5e-78	294
MSTRG.95931.1	NONGGAT012413.1	90.27	1	noncode	229	50	226	20	2	6	229	2363	2588	5e-78	294
MSTRG.95931.1	NONGGAT013012.1	90.87	0.96	noncode	229	50	219	18	2	13	229	2883	2665	2e-77	292
MSTRG.95931.1	NONGGAT013012.1	90.87	0.96	noncode	229	50	219	18	2	13	229	2883	2665	2e-77	292
MSTRG.95931.1	NONGGAT001769.2	92	0.88	noncode	229	50	200	14	2	6	204	1130	932	1e-73	279
MSTRG.95931.1	NONGGAT001769.2	92	0.88	noncode	229	50	200	14	2	6	204	1130	932	1e-73	279
MSTRG.95931.1	NONGGAT013979.1	89.5	0.96	noncode	229	50	219	22	1	12	229	1811	1593	2e-72	276
MSTRG.95931.1	NONGGAT013979.1	89.5	0.96	noncode	229	50	219	22	1	12	229	1811	1593	2e-72	276
MSTRG.95931.1	NONGGAT009068.2	90.78	0.91	noncode	229	50	206	15	2	1	204	476	679	2e-71	272
MSTRG.95931.1	NONGGAT009068.2	90.78	0.91	noncode	229	50	206	15	2	1	204	476	679	2e-71	272
MSTRG.95931.1	NONGGAT012962.1	86.58	1.02	noncode	229	50	231	29	2	1	229	3521	3751	8e-66	254
MSTRG.95931.1	NONGGAT012962.1	86.58	1.02	noncode	229	50	231	29	2	1	229	3521	3751	8e-66	254
MSTRG.95931.1	NONGGAT012967.1	90.81	0.81	noncode	229	50	185	15	2	6	188	225	41	1e-63	246
MSTRG.95931.1	NONGGAT012967.1	90.81	0.81	noncode	229	50	185	15	2	6	188	225	41	1e-63	246
MSTRG.22500.1	NONGGAT013298.1	89.2	0.96	noncode	263	50	250	25	2	1	249	1781	1533	6e-83	311
MSTRG.22500.1	NONGGAT013298.1	89.2	0.96	noncode	263	50	250	25	2	1	249	1781	1533	6e-83	311
MSTRG.22500.1	NONGGAT006590.2	84.23	0.93	noncode	263	50	241	16	3	1	241	1686	1904	5e-54	215
MSTRG.22500.1	NONGGAT006590.2	84.23	0.93	noncode	263	50	241	16	3	1	241	1686	1904	5e-54	215
MSTRG.95689.1	NONGGAT001188.2	95.86	0.93	noncode	286	50	266	10	1	1	265	266	1	2e-118	429
MSTRG.95689.1	NONGGAT001188.2	95.86	0.93	noncode	286	50	266	10	1	1	265	266	1	2e-118	429
MSTRG.95689.1	NONGGAT012480.1	90.91	1.01	noncode	286	50	286	21	3	1	286	1082	1362	2e-103	379
MSTRG.95689.1	NONGGAT012480.1	90.91	1.01	noncode	286	50	286	21	3	1	286	1082	1362	2e-103	379
MSTRG.115844.1	NONGGAT007439.2	100	0.86	noncode	217	50	186	0	0	32	217	424	609	5e-93	344
MSTRG.115844.1	NONGGAT007439.2	100	0.86	noncode	217	50	186	0	0	32	217	424	609	5e-93	344
MSTRG.52838.1	NONGGAT003893.2	100	0.86	noncode	271	50	233	0	0	39	271	92	324	4e-119	431
MSTRG.52838.1	NONGGAT003893.2	100	0.86	noncode	271	50	233	0	0	39	271	92	324	4e-119	431
MSTRG.100657.2	NONGGAT006717.2	100	0.88	noncode	261	50	230	0	0	32	261	1	230	2e-117	425
MSTRG.100657.2	NONGGAT006718.2	100	0.88	noncode	261	50	230	0	0	32	261	1	230	2e-117	425
MSTRG.100657.2	NONGGAT006717.2	100	0.88	noncode	261	50	230	0	0	32	261	1	230	2e-117	425
MSTRG.100657.2	NONGGAT006718.2	100	0.88	noncode	261	50	230	0	0	32	261	1	230	2e-117	425
MSTRG.45158.2	NONGGAT011178.2	96.59	0.95	noncode	1457	50	1378	28	14	1	1377	2005	646	0	2266
MSTRG.45158.2	NONGGAT011178.2	96.59	0.95	noncode	1457	50	1378	28	14	1	1377	2005	646	0	2266
MSTRG.45158.2	NONGGAT011179.2	92.9	0.86	noncode	1457	50	1239	63	17	213	1445	324	1543	0	1777
MSTRG.45158.2	NONGGAT011179.2	92.9	0.86	noncode	1457	50	1239	63	17	213	1445	324	1543	0	1777
MSTRG.45158.2	NONGGAT011180.2	93.4	0.81	noncode	1457	50	1167	56	16	213	1377	1011	2158	0	1709
MSTRG.45158.2	NONGGAT011180.2	93.4	0.81	noncode	1457	50	1167	56	16	213	1377	1011	2158	0	1709
MSTRG.26748.3	NONGGAT001845.2	100	1	noncode	1498	50	1498	0	0	1	1498	177	1674	0	2767
MSTRG.26748.3	NONGGAT001845.2	100	1	noncode	1498	50	1498	0	0	1	1498	177	1674	0	2767
MSTRG.1091.1	NONGGAT000082.2	100	0.98	noncode	412	50	403	0	0	1	403	256	658	0	745
MSTRG.1091.1	NONGGAT000082.2	100	0.98	noncode	412	50	403	0	0	1	403	256	658	0	745
MSTRG.73844.9	NONGGAT010808.2	99.61	1	noncode	770	50	770	3	0	1	770	34	803	0	1406
MSTRG.73844.9	NONGGAT010808.2	99.61	1	noncode	770	50	770	3	0	1	770	34	803	0	1406
MSTRG.73844.9	NONGGAT010809.2	95.19	1	noncode	770	50	770	37	0	1	770	809	40	0	1218
MSTRG.73844.9	NONGGAT010809.2	95.19	1	noncode	770	50	770	37	0	1	770	809	40	0	1218
MSTRG.113237.1	NONGGAT007295.2	99.83	1	noncode	603	50	603	1	0	1	603	219	821	0	1109
MSTRG.113237.1	NONGGAT007295.2	99.83	1	noncode	603	50	603	1	0	1	603	219	821	0	1109
MSTRG.77801.4	NONGGAT005619.2	98.67	0.92	noncode	2121	50	1952	0	1	1	1926	3888	1937	0	3437
MSTRG.77801.4	NONGGAT005618.2	98.67	0.92	noncode	2121	50	1952	0	1	1	1926	3505	1554	0	3437
MSTRG.77801.4	NONGGAT005619.2	98.67	0.92	noncode	2121	50	1952	0	1	1	1926	3888	1937	0	3437
MSTRG.77801.4	NONGGAT005618.2	98.67	0.92	noncode	2121	50	1952	0	1	1	1926	3505	1554	0	3437
MSTRG.46017.1	NONGGAT003468.2	99.45	0.93	noncode	1170	50	1091	0	1	19	1109	1	1085	0	1977
MSTRG.46017.1	NONGGAT003468.2	99.45	0.93	noncode	1170	50	1091	0	1	19	1109	1	1085	0	1977
MSTRG.46017.1	NONGGAT003469.2	100	0.89	noncode	1170	50	1039	0	0	71	1109	136	1174	0	1919
MSTRG.46017.1	NONGGAT003469.2	100	0.89	noncode	1170	50	1039	0	0	71	1109	136	1174	0	1919
MSTRG.146962.1	NONGGAT011742.2	100	0.9	noncode	390	50	350	0	0	41	390	1309	1658	0	647
MSTRG.146962.1	NONGGAT011742.2	100	0.9	noncode	390	50	350	0	0	41	390	1309	1658	0	647
MSTRG.3641.1	NONGGAT012480.1	89.44	0.97	noncode	942	50	909	87	5	37	942	746	1648	0	1138
MSTRG.3641.1	NONGGAT012480.1	89.44	0.97	noncode	942	50	909	87	5	37	942	746	1648	0	1138
MSTRG.65984.2	NONGGAT004605.2	82.47	1.05	noncode	291	50	291	30	14	5	291	165	438	4e-60	235
MSTRG.65984.2	NONGGAT004605.2	82.47	1.05	noncode	291	50	291	30	14	5	291	165	438	4e-60	235
MSTRG.47543.2	NONGGAT003659.2	100	0.91	noncode	626	50	571	0	0	56	626	505	1075	0	1055
MSTRG.47543.2	NONGGAT003658.2	100	0.91	noncode	626	50	571	0	0	56	626	203	773	0	1055
MSTRG.47543.2	NONGGAT003659.2	100	0.91	noncode	626	50	571	0	0	56	626	505	1075	0	1055
MSTRG.47543.2	NONGGAT003658.2	100	0.91	noncode	626	50	571	0	0	56	626	203	773	0	1055
MSTRG.47543.2	NONGGAT003660.2	99.81	0.85	noncode	626	50	531	0	1	56	586	524	1053	0	974
MSTRG.47543.2	NONGGAT003660.2	99.81	0.85	noncode	626	50	531	0	1	56	586	524	1053	0	974
MSTRG.138275.8	NONGGAT008980.2	100	1	noncode	459	50	459	0	0	1	459	204	662	0	848
MSTRG.138275.8	NONGGAT008980.2	100	1	noncode	459	50	459	0	0	1	459	204	662	0	848
MSTRG.145396.1	NONGGAT011671.2	100	0.93	noncode	794	50	737	0	0	58	794	169	905	0	1362
MSTRG.145396.1	NONGGAT011671.2	100	0.93	noncode	794	50	737	0	0	58	794	169	905	0	1362
MSTRG.96992.1	NONGGAT009897.2	87.77	0.86	noncode	382	50	327	30	3	44	365	322	1	1e-101	374
MSTRG.96992.1	NONGGAT009897.2	85.63	0.87	noncode	382	50	327	37	5	1	322	322	1	5e-90	335
MSTRG.96992.1	NONGGAT009897.2	87.77	0.86	noncode	382	50	327	30	3	44	365	322	1	1e-101	374
MSTRG.96992.1	NONGGAT009897.2	85.63	0.87	noncode	382	50	327	37	5	1	322	322	1	5e-90	335
MSTRG.22463.17	NONGGAT001482.2	81.56	0.88	noncode	947	50	808	116	25	150	947	646	1430	3e-180	636
MSTRG.22463.17	NONGGAT001482.2	81.56	0.88	noncode	947	50	808	116	25	150	947	646	1430	3e-180	636
MSTRG.128720.1	NONGGAT008265.2	99.54	1	noncode	219	50	219	1	0	1	219	712	930	1e-109	399
MSTRG.128720.1	NONGGAT008265.2	99.54	1	noncode	219	50	219	1	0	1	219	712	930	1e-109	399
MSTRG.147998.1	NONGGAT000259.2	89.5	0.81	noncode	225	50	181	18	1	1	181	126	305	5e-58	228
MSTRG.147998.1	NONGGAT000259.2	89.5	0.81	noncode	225	50	181	18	1	1	181	126	305	5e-58	228
MSTRG.138984.1	NONGGAT009035.2	99.63	0.91	noncode	897	50	814	0	1	1	814	37	847	0	1483
MSTRG.138984.1	NONGGAT009035.2	99.63	0.91	noncode	897	50	814	0	1	1	814	37	847	0	1483
MSTRG.138984.1	NONGGAT009039.2	99.62	0.87	noncode	897	50	782	0	1	33	814	130	908	0	1424
MSTRG.138984.1	NONGGAT009038.2	99.62	0.87	noncode	897	50	782	0	1	33	814	71	849	0	1424
MSTRG.138984.1	NONGGAT009039.2	99.62	0.87	noncode	897	50	782	0	1	33	814	130	908	0	1424
MSTRG.138984.1	NONGGAT009038.2	99.62	0.87	noncode	897	50	782	0	1	33	814	71	849	0	1424
MSTRG.138984.1	NONGGAT009036.2	97.81	0.87	noncode	897	50	776	0	3	1	759	31	806	0	1323
MSTRG.138984.1	NONGGAT009036.2	97.81	0.87	noncode	897	50	776	0	3	1	759	31	806	0	1323
MSTRG.41494.2	NONGGAT002984.2	90.38	0.98	noncode	214	50	208	0	1	1	188	80	287	2e-66	255
MSTRG.41494.2	NONGGAT002984.2	90.38	0.98	noncode	214	50	208	0	1	1	188	80	287	2e-66	255
MSTRG.77597.1	NONGGAT005694.2	100	1	noncode	220	50	220	0	0	1	220	155	374	6e-112	407
MSTRG.77597.1	NONGGAT005691.2	100	1	noncode	220	50	220	0	0	1	220	156	375	6e-112	407
MSTRG.77597.1	NONGGAT005694.2	100	1	noncode	220	50	220	0	0	1	220	155	374	6e-112	407
MSTRG.77597.1	NONGGAT005691.2	100	1	noncode	220	50	220	0	0	1	220	156	375	6e-112	407
MSTRG.77597.1	NONGGAT005693.2	94.02	1.07	noncode	220	50	234	0	1	1	220	155	388	2e-92	342
MSTRG.77597.1	NONGGAT005693.2	94.02	1.07	noncode	220	50	234	0	1	1	220	155	388	2e-92	342
MSTRG.77597.1	NONGGAT005690.2	93.64	1	noncode	220	50	220	0	1	1	220	707	502	1e-84	316
MSTRG.77597.1	NONGGAT005690.2	93.64	1	noncode	220	50	220	0	1	1	220	707	502	1e-84	316
MSTRG.19621.1	NONGGAT003795.2	99.33	0.85	noncode	349	50	297	2	0	1	297	199	495	3e-151	538
MSTRG.19621.1	NONGGAT003795.2	99.33	0.85	noncode	349	50	297	2	0	1	297	199	495	3e-151	538
MSTRG.19470.1	NONGGAT012480.1	92.4	1.01	noncode	327	50	329	23	1	1	327	1105	777	4e-130	468
MSTRG.19470.1	NONGGAT012480.1	92.4	1.01	noncode	327	50	329	23	1	1	327	1105	777	4e-130	468
MSTRG.19470.1	NONGGAT001188.2	96.09	0.86	noncode	327	50	281	11	0	1	281	243	523	2e-127	459
MSTRG.19470.1	NONGGAT001188.2	96.09	0.86	noncode	327	50	281	11	0	1	281	243	523	2e-127	459
MSTRG.19470.1	NONGGAT005571.2	90.19	0.97	noncode	327	50	316	27	2	1	316	783	1094	3e-112	409
MSTRG.19470.1	NONGGAT005569.2	90.19	0.97	noncode	327	50	316	27	2	1	316	783	1094	3e-112	409
MSTRG.19470.1	NONGGAT005571.2	90.19	0.97	noncode	327	50	316	27	2	1	316	783	1094	3e-112	409
MSTRG.19470.1	NONGGAT005569.2	90.19	0.97	noncode	327	50	316	27	2	1	316	783	1094	3e-112	409
MSTRG.19470.1	NONGGAT012481.1	91.96	0.87	noncode	327	50	286	23	0	42	327	982	697	4e-110	401
MSTRG.19470.1	NONGGAT012481.1	91.96	0.87	noncode	327	50	286	23	0	42	327	982	697	4e-110	401
MSTRG.19470.1	NONGGAT000259.2	90.3	0.82	noncode	327	50	268	25	1	60	327	4	270	2e-94	350
MSTRG.19470.1	NONGGAT000259.2	90.3	0.82	noncode	327	50	268	25	1	60	327	4	270	2e-94	350
MSTRG.140440.2	NONGGAT009186.2	100	0.81	noncode	1549	50	1261	0	0	289	1549	424	1684	0	2329
MSTRG.140440.2	NONGGAT009186.2	100	0.81	noncode	1549	50	1261	0	0	289	1549	424	1684	0	2329
MSTRG.138984.3	NONGGAT009039.2	100	0.92	noncode	953	50	872	0	0	1	872	37	908	0	1611
MSTRG.138984.3	NONGGAT009039.2	100	0.92	noncode	953	50	872	0	0	1	872	37	908	0	1611
MSTRG.138984.3	NONGGAT009038.2	99.87	0.82	noncode	953	50	785	0	1	88	872	66	849	0	1443
MSTRG.138984.3	NONGGAT009038.2	99.87	0.82	noncode	953	50	785	0	1	88	872	66	849	0	1443
MSTRG.138984.3	NONGGAT009035.2	100	0.82	noncode	953	50	779	0	0	94	872	69	847	0	1439
MSTRG.138984.3	NONGGAT009035.2	100	0.82	noncode	953	50	779	0	0	94	872	69	847	0	1439
MSTRG.45029.4	NONGGAT003347.2	100	0.9	noncode	796	50	713	0	0	84	796	550	1262	0	1317
MSTRG.45029.4	NONGGAT003347.2	100	0.9	noncode	796	50	713	0	0	84	796	550	1262	0	1317
MSTRG.45029.4	NONGGAT003346.2	100	0.89	noncode	796	50	712	0	0	85	796	319	1030	0	1315
MSTRG.45029.4	NONGGAT003346.2	100	0.89	noncode	796	50	712	0	0	85	796	319	1030	0	1315
MSTRG.16.1	NONGGAT010285.2	100	0.96	noncode	288	50	277	0	0	12	288	1	277	2e-143	512
MSTRG.16.1	NONGGAT010285.2	100	0.96	noncode	288	50	277	0	0	12	288	1	277	2e-143	512
MSTRG.59551.1	NONGGAT016648.1	94.95	1	noncode	218	50	218	11	0	1	218	353	570	2e-92	342
MSTRG.59551.1	NONGGAT016647.1	94.95	1	noncode	218	50	218	11	0	1	218	633	850	2e-92	342
MSTRG.59551.1	NONGGAT016648.1	94.95	1	noncode	218	50	218	11	0	1	218	353	570	2e-92	342
MSTRG.59551.1	NONGGAT016647.1	94.95	1	noncode	218	50	218	11	0	1	218	633	850	2e-92	342
MSTRG.59551.1	NONGGAT001309.2	94.5	1	noncode	218	50	218	12	0	1	218	3246	3463	8e-91	337
MSTRG.59551.1	NONGGAT001309.2	94.5	1	noncode	218	50	218	12	0	1	218	3246	3463	8e-91	337
MSTRG.59551.1	NONGGAT012962.1	94.81	0.97	noncode	218	50	212	11	0	7	218	3563	3774	4e-89	331
MSTRG.59551.1	NONGGAT012594.1	94.81	0.97	noncode	218	50	212	11	0	7	218	806	1017	4e-89	331
MSTRG.59551.1	NONGGAT002514.2	94.04	1	noncode	218	50	218	13	0	1	218	342	125	4e-89	331
MSTRG.59551.1	NONGGAT012962.1	94.81	0.97	noncode	218	50	212	11	0	7	218	3563	3774	4e-89	331
MSTRG.59551.1	NONGGAT012594.1	94.81	0.97	noncode	218	50	212	11	0	7	218	806	1017	4e-89	331
MSTRG.59551.1	NONGGAT002514.2	94.04	1	noncode	218	50	218	13	0	1	218	342	125	4e-89	331
MSTRG.59551.1	NONGGAT012413.1	93.09	1	noncode	218	50	217	15	0	1	217	2394	2610	3e-85	318
MSTRG.59551.1	NONGGAT012413.1	93.09	1	noncode	218	50	217	15	0	1	217	2394	2610	3e-85	318
MSTRG.59551.1	NONGGAT014535.1	92.66	1	noncode	218	50	218	15	1	1	218	1474	1258	1e-83	313
MSTRG.59551.1	NONGGAT014535.1	92.66	1	noncode	218	50	218	15	1	1	218	1474	1258	1e-83	313
MSTRG.59551.1	NONGGAT014020.1	92.2	1	noncode	218	50	218	16	1	1	218	1991	2207	6e-82	307
MSTRG.59551.1	NONGGAT014020.1	92.2	1	noncode	218	50	218	16	1	1	218	1991	2207	6e-82	307
MSTRG.59551.1	NONGGAT013979.1	93.97	0.91	noncode	218	50	199	12	0	6	204	1782	1584	3e-80	302
MSTRG.59551.1	NONGGAT012006.2	91.74	1	noncode	218	50	218	17	1	1	218	1271	1055	3e-80	302
MSTRG.59551.1	NONGGAT012006.2	91.74	1	noncode	218	50	218	17	1	1	218	4894	4678	3e-80	302
MSTRG.59551.1	NONGGAT012006.2	91.74	1	noncode	218	50	218	17	1	1	218	8648	8432	3e-80	302
MSTRG.59551.1	NONGGAT013979.1	93.97	0.91	noncode	218	50	199	12	0	6	204	1782	1584	3e-80	302
MSTRG.59551.1	NONGGAT012006.2	91.74	1	noncode	218	50	218	17	1	1	218	1271	1055	3e-80	302
MSTRG.59551.1	NONGGAT012006.2	91.74	1	noncode	218	50	218	17	1	1	218	4894	4678	3e-80	302
MSTRG.59551.1	NONGGAT012006.2	91.74	1	noncode	218	50	218	17	1	1	218	8648	8432	3e-80	302
MSTRG.59551.1	NONGGAT014506.1	94	0.93	noncode	218	50	200	9	2	1	200	1106	1302	1e-79	300
MSTRG.59551.1	NONGGAT014506.1	94	0.93	noncode	218	50	200	9	2	1	200	1106	1302	1e-79	300
MSTRG.59551.1	NONGGAT013012.1	93.91	0.9	noncode	218	50	197	12	0	1	197	2859	2663	4e-79	298
MSTRG.59551.1	NONGGAT013012.1	93.91	0.9	noncode	218	50	197	12	0	1	197	2859	2663	4e-79	298
MSTRG.59551.1	NONGGAT012758.1	92.06	0.88	noncode	218	50	189	13	2	20	208	637	451	4e-69	265
MSTRG.59551.1	NONGGAT012758.1	92.06	0.88	noncode	218	50	189	13	2	20	208	637	451	4e-69	265
MSTRG.96540.11	NONGGAT010344.2	94.28	0.91	noncode	1051	50	944	46	8	111	1051	5	943	0	1437
MSTRG.96540.11	NONGGAT010344.2	94.28	0.91	noncode	1051	50	944	46	8	111	1051	5	943	0	1437
MSTRG.96540.11	NONGGAT010332.2	96.11	0.81	noncode	1051	50	848	27	6	207	1051	1	845	0	1378
MSTRG.96540.11	NONGGAT010332.2	96.11	0.81	noncode	1051	50	848	27	6	207	1051	1	845	0	1378
MSTRG.96540.11	NONGGAT010335.2	92.84	0.84	noncode	1051	50	880	51	6	132	1009	1	870	0	1266
MSTRG.96540.11	NONGGAT010335.2	92.84	0.84	noncode	1051	50	880	51	6	132	1009	1	870	0	1266
MSTRG.41715.61	NONGGAT003016.2	85.61	0.98	noncode	579	50	556	64	12	1	551	545	1	2e-160	569
MSTRG.41715.61	NONGGAT003016.2	85.61	0.98	noncode	579	50	556	64	12	1	551	545	1	2e-160	569
MSTRG.118167.1	NONGGAT007596.2	100	0.84	noncode	1137	50	959	0	0	179	1137	1	959	0	1772
MSTRG.118167.1	NONGGAT007596.2	100	0.84	noncode	1137	50	959	0	0	179	1137	1	959	0	1772
MSTRG.20440.1	NONGGAT013042.1	95.33	1	noncode	214	50	214	10	0	1	214	309	96	6e-92	340
MSTRG.20440.1	NONGGAT012527.1	95.33	1	noncode	214	50	214	10	0	1	214	364	577	6e-92	340
MSTRG.20440.1	NONGGAT013042.1	95.33	1	noncode	214	50	214	10	0	1	214	309	96	6e-92	340
MSTRG.20440.1	NONGGAT012527.1	95.33	1	noncode	214	50	214	10	0	1	214	364	577	6e-92	340
MSTRG.20440.1	NONGGAT000259.2	92.06	1	noncode	214	50	214	16	1	1	214	88	300	1e-79	300
MSTRG.20440.1	NONGGAT000259.2	92.06	1	noncode	214	50	214	16	1	1	214	88	300	1e-79	300
MSTRG.20440.1	NONGGAT012481.1	91.16	1.01	noncode	214	50	215	18	1	1	214	880	666	6e-77	291
MSTRG.20440.1	NONGGAT012480.1	91.16	1.01	noncode	214	50	215	18	1	1	214	960	746	6e-77	291
MSTRG.20440.1	NONGGAT012481.1	91.16	1.01	noncode	214	50	215	18	1	1	214	880	666	6e-77	291
MSTRG.20440.1	NONGGAT012480.1	91.16	1.01	noncode	214	50	215	18	1	1	214	960	746	6e-77	291
MSTRG.20440.1	NONGGAT005571.2	93.06	0.81	noncode	214	50	173	12	0	1	173	922	1094	8e-66	254
MSTRG.20440.1	NONGGAT005569.2	93.06	0.81	noncode	214	50	173	12	0	1	173	922	1094	8e-66	254
MSTRG.20440.1	NONGGAT005571.2	93.06	0.81	noncode	214	50	173	12	0	1	173	922	1094	8e-66	254
MSTRG.20440.1	NONGGAT005569.2	93.06	0.81	noncode	214	50	173	12	0	1	173	922	1094	8e-66	254
MSTRG.33125.2	NONGGAT001188.2	94.78	0.99	noncode	349	50	345	17	1	1	344	4	348	1e-150	536
MSTRG.33125.2	NONGGAT001188.2	94.78	0.99	noncode	349	50	345	17	1	1	344	4	348	1e-150	536
MSTRG.33125.2	NONGGAT012480.1	89.6	1	noncode	349	50	346	29	3	1	344	1338	998	2e-119	433
MSTRG.33125.2	NONGGAT012480.1	89.6	1	noncode	349	50	346	29	3	1	344	1338	998	2e-119	433
MSTRG.20072.1	NONGGAT001271.2	100	1	noncode	253	50	253	0	0	1	253	762	1014	3e-130	468
MSTRG.20072.1	NONGGAT001271.2	100	1	noncode	253	50	253	0	0	1	253	762	1014	3e-130	468
MSTRG.20072.1	NONGGAT001272.2	98.57	0.83	noncode	253	50	210	0	1	44	253	1	207	3e-100	368
MSTRG.20072.1	NONGGAT001272.2	98.57	0.83	noncode	253	50	210	0	1	44	253	1	207	3e-100	368
MSTRG.46556.2	NONGGAT003541.2	100	0.83	noncode	1020	50	848	0	0	173	1020	147	994	0	1567
MSTRG.46556.2	NONGGAT003541.2	100	0.83	noncode	1020	50	848	0	0	173	1020	147	994	0	1567
MSTRG.22426.1	NONGGAT001482.2	98.01	1	noncode	453	50	453	9	0	1	453	769	1221	0	787
MSTRG.22426.1	NONGGAT001482.2	86.37	0.92	noncode	453	50	411	51	4	3	412	1154	1560	1e-122	444
MSTRG.22426.1	NONGGAT001482.2	98.01	1	noncode	453	50	453	9	0	1	453	769	1221	0	787
MSTRG.22426.1	NONGGAT001482.2	86.37	0.92	noncode	453	50	411	51	4	3	412	1154	1560	1e-122	444
MSTRG.22426.1	NONGGAT001481.2	84.79	0.96	noncode	453	50	434	65	1	1	433	1627	1194	6e-120	435
MSTRG.22426.1	NONGGAT001481.2	80.34	0.93	noncode	453	50	407	55	17	65	453	1957	1558	6e-75	285
MSTRG.22426.1	NONGGAT001481.2	84.79	0.96	noncode	453	50	434	65	1	1	433	1627	1194	6e-120	435
MSTRG.22426.1	NONGGAT001481.2	80.34	0.93	noncode	453	50	407	55	17	65	453	1957	1558	6e-75	285
MSTRG.54037.1	NONGGAT003966.2	85.93	0.82	noncode	990	50	796	67	17	224	988	1	782	0	808
MSTRG.54037.1	NONGGAT003966.2	85.93	0.82	noncode	990	50	796	67	17	224	988	1	782	0	808
MSTRG.33574.1	NONGGAT002313.2	100	1	noncode	564	50	564	0	0	1	564	4	567	0	1042
MSTRG.33574.1	NONGGAT002313.2	100	1	noncode	564	50	564	0	0	1	564	4	567	0	1042
MSTRG.55729.2	NONGGAT004040.2	99.77	1	noncode	1287	50	1287	3	0	1	1287	1600	314	0	2361
MSTRG.55729.2	NONGGAT004040.2	99.77	1	noncode	1287	50	1287	3	0	1	1287	1600	314	0	2361
MSTRG.125685.29	NONGGAT006276.2	83.09	1.01	noncode	345	50	337	41	12	12	345	1271	1594	3e-77	292
MSTRG.125685.29	NONGGAT006276.2	83.09	1.01	noncode	345	50	337	41	12	12	345	1271	1594	3e-77	292
MSTRG.41715.26	NONGGAT003016.2	93.64	0.96	noncode	714	50	676	17	10	30	684	671	1	0	987
MSTRG.41715.26	NONGGAT003016.2	93.64	0.96	noncode	714	50	676	17	10	30	684	671	1	0	987
MSTRG.41715.93	NONGGAT003016.2	87.93	0.9	noncode	386	50	348	41	1	1	348	347	1	3e-112	409
MSTRG.41715.93	NONGGAT003016.2	87.93	0.9	noncode	386	50	348	41	1	1	348	347	1	3e-112	409
MSTRG.97575.1	NONGGAT009468.2	100	1	noncode	689	50	689	0	0	1	689	1560	2248	0	1273
MSTRG.97575.1	NONGGAT009469.2	100	1	noncode	689	50	689	0	0	1	689	866	1554	0	1273
MSTRG.97575.1	NONGGAT009468.2	100	1	noncode	689	50	689	0	0	1	689	1560	2248	0	1273
MSTRG.97575.1	NONGGAT009469.2	100	1	noncode	689	50	689	0	0	1	689	866	1554	0	1273
MSTRG.22435.1	NONGGAT014535.1	96.23	1.01	noncode	211	50	212	6	2	1	211	1316	1526	1e-93	346
MSTRG.22435.1	NONGGAT014535.1	96.23	1.01	noncode	211	50	212	6	2	1	211	1316	1526	1e-93	346
MSTRG.22435.1	NONGGAT014020.1	96.17	1	noncode	211	50	209	7	1	1	208	2150	1942	6e-92	340
MSTRG.22435.1	NONGGAT014020.1	96.17	1	noncode	211	50	209	7	1	1	208	2150	1942	6e-92	340
MSTRG.22435.1	NONGGAT001769.2	92.89	1.01	noncode	211	50	211	13	2	2	211	943	1152	2e-81	305
MSTRG.22435.1	NONGGAT001769.2	92.89	1.01	noncode	211	50	211	13	2	2	211	943	1152	2e-81	305
MSTRG.22435.1	NONGGAT009068.2	91.51	1.01	noncode	211	50	212	14	2	2	211	668	459	2e-76	289
MSTRG.22435.1	NONGGAT009068.2	91.51	1.01	noncode	211	50	212	14	2	2	211	668	459	2e-76	289
MSTRG.22435.1	NONGGAT016647.1	90.61	1.02	noncode	211	50	213	18	2	1	211	792	580	4e-74	281
MSTRG.22435.1	NONGGAT016647.1	90.61	1.02	noncode	211	50	213	18	2	1	211	792	580	4e-74	281
MSTRG.22435.1	NONGGAT002514.2	90.57	1.01	noncode	211	50	212	19	1	1	211	183	394	1e-73	279
MSTRG.22435.1	NONGGAT002514.2	90.57	1.01	noncode	211	50	212	19	1	1	211	183	394	1e-73	279
MSTRG.22435.1	NONGGAT012967.1	91.26	1	noncode	211	50	206	14	4	7	209	41	245	5e-73	278
MSTRG.22435.1	NONGGAT012967.1	91.26	1	noncode	211	50	206	14	4	7	209	41	245	5e-73	278
MSTRG.22435.1	NONGGAT001309.2	90.14	1.02	noncode	211	50	213	19	2	1	211	3405	3193	2e-72	276
MSTRG.22435.1	NONGGAT001309.2	90.14	1.02	noncode	211	50	213	19	2	1	211	3405	3193	2e-72	276
MSTRG.22435.1	NONGGAT013012.1	89.25	1.03	noncode	211	50	214	20	3	1	211	2699	2912	4e-69	265
MSTRG.22435.1	NONGGAT013012.1	89.25	1.03	noncode	211	50	214	20	3	1	211	2699	2912	4e-69	265
MSTRG.22435.1	NONGGAT016648.1	91.62	0.91	noncode	211	50	191	14	2	1	189	512	322	1e-68	263
MSTRG.22435.1	NONGGAT012413.1	89.15	1.01	noncode	211	50	212	21	2	2	211	2552	2341	1e-68	263
MSTRG.22435.1	NONGGAT016648.1	91.62	0.91	noncode	211	50	191	14	2	1	189	512	322	1e-68	263
MSTRG.22435.1	NONGGAT012413.1	89.15	1.01	noncode	211	50	212	21	2	2	211	2552	2341	1e-68	263
MSTRG.22435.1	NONGGAT014129.1	92.27	0.87	noncode	211	50	181	12	2	33	211	1	181	2e-66	255
MSTRG.22435.1	NONGGAT012594.1	88.63	1.01	noncode	211	50	211	22	2	1	209	959	749	2e-66	255
MSTRG.22435.1	NONGGAT014129.1	92.27	0.87	noncode	211	50	181	12	2	33	211	1	181	2e-66	255
MSTRG.22435.1	NONGGAT012594.1	88.63	1.01	noncode	211	50	211	22	2	1	209	959	749	2e-66	255
MSTRG.22435.1	NONGGAT016668.1	89.22	0.98	noncode	211	50	204	20	2	7	208	322	119	8e-66	254
MSTRG.22435.1	NONGGAT016668.1	89.22	0.98	noncode	211	50	204	20	2	7	208	322	119	8e-66	254
MSTRG.22435.1	NONGGAT014506.1	92.57	0.83	noncode	211	50	175	11	1	1	175	1262	1090	1e-64	250
MSTRG.22435.1	NONGGAT014506.1	92.57	0.83	noncode	211	50	175	11	1	1	175	1262	1090	1e-64	250
MSTRG.22435.1	NONGGAT014911.1	90.61	0.87	noncode	211	50	181	15	2	32	210	2168	1988	2e-61	239
MSTRG.22435.1	NONGGAT014911.1	90.61	0.87	noncode	211	50	181	15	2	32	210	2168	1988	2e-61	239
MSTRG.22435.1	NONGGAT016115.1	89.84	0.9	noncode	211	50	187	16	3	28	211	170	356	8e-61	237
MSTRG.22435.1	NONGGAT016115.1	89.84	0.9	noncode	211	50	187	16	3	28	211	170	356	8e-61	237
MSTRG.22435.1	NONGGAT012962.1	86.73	1.01	noncode	211	50	211	26	2	3	211	3714	3504	1e-59	233
MSTRG.22435.1	NONGGAT012962.1	86.73	1.01	noncode	211	50	211	26	2	3	211	3714	3504	1e-59	233
MSTRG.22435.1	NONGGAT013049.1	89.25	0.89	noncode	211	50	186	17	3	29	211	1335	1150	1e-58	230
MSTRG.22435.1	NONGGAT013049.1	89.25	0.89	noncode	211	50	186	17	3	29	211	1335	1150	1e-58	230
MSTRG.117733.1	NONGGAT007554.2	99.53	1	noncode	214	50	214	1	0	1	214	107	320	6e-107	390
MSTRG.117733.1	NONGGAT007554.2	99.53	1	noncode	214	50	214	1	0	1	214	107	320	6e-107	390
MSTRG.41349.2	NONGGAT002980.2	91.51	1.09	noncode	238	50	259	1	1	1	238	310	52	8e-91	337
MSTRG.41349.2	NONGGAT002980.2	91.51	1.09	noncode	238	50	259	1	1	1	238	310	52	8e-91	337
MSTRG.45539.2	NONGGAT003403.2	100	1	noncode	378	50	378	0	0	1	378	208	585	0	699
MSTRG.45539.2	NONGGAT003403.2	100	1	noncode	378	50	378	0	0	1	378	208	585	0	699
MSTRG.109039.15	NONGGAT007108.2	100	0.86	noncode	1906	50	1635	0	0	217	1851	603	2237	0	3020
MSTRG.109039.15	NONGGAT007108.2	100	0.86	noncode	1906	50	1635	0	0	217	1851	603	2237	0	3020
MSTRG.109039.15	NONGGAT007109.2	99.51	0.86	noncode	1906	50	1635	0	1	217	1851	603	2229	0	2968
MSTRG.109039.15	NONGGAT007109.2	99.51	0.86	noncode	1906	50	1635	0	1	217	1851	603	2229	0	2968
MSTRG.28496.1	NONGGAT001978.2	99.48	0.82	noncode	236	50	194	1	0	43	236	459	652	8e-96	353
MSTRG.28496.1	NONGGAT001978.2	99.48	0.82	noncode	236	50	194	1	0	43	236	459	652	8e-96	353
MSTRG.135000.1	NONGGAT008721.2	100	0.86	noncode	829	50	710	0	0	120	829	1	710	0	1312
MSTRG.135000.1	NONGGAT008721.2	100	0.86	noncode	829	50	710	0	0	120	829	1	710	0	1312
MSTRG.129808.1	NONGGAT008360.2	100	0.96	noncode	842	50	805	0	0	38	842	185	989	0	1487
MSTRG.129808.1	NONGGAT008359.2	100	0.96	noncode	842	50	805	0	0	38	842	180	984	0	1487
MSTRG.129808.1	NONGGAT008360.2	100	0.96	noncode	842	50	805	0	0	38	842	185	989	0	1487
MSTRG.129808.1	NONGGAT008359.2	100	0.96	noncode	842	50	805	0	0	38	842	180	984	0	1487
MSTRG.131065.4	NONGGAT008441.2	100	0.82	noncode	396	50	326	0	0	1	326	231	556	1e-170	603
MSTRG.131065.4	NONGGAT008441.2	100	0.82	noncode	396	50	326	0	0	1	326	231	556	1e-170	603
MSTRG.113727.15	NONGGAT009678.2	89.42	1.03	noncode	712	50	728	50	6	8	712	62	785	0	893
MSTRG.113727.15	NONGGAT009677.2	89.42	1.03	noncode	712	50	728	50	6	8	712	58	781	0	893
MSTRG.113727.15	NONGGAT009678.2	89.42	1.03	noncode	712	50	728	50	6	8	712	62	785	0	893
MSTRG.113727.15	NONGGAT009677.2	89.42	1.03	noncode	712	50	728	50	6	8	712	58	781	0	893
MSTRG.71377.1	NONGGAT005090.2	100	1	noncode	697	50	697	0	0	1	697	270	966	0	1288
MSTRG.71377.1	NONGGAT005090.2	100	1	noncode	697	50	697	0	0	1	697	270	966	0	1288
MSTRG.41715.21	NONGGAT003016.2	95.99	0.91	noncode	769	50	698	22	3	73	769	776	84	0	1129
MSTRG.41715.21	NONGGAT003016.2	95.99	0.91	noncode	769	50	698	22	3	73	769	776	84	0	1129
MSTRG.74043.4	NONGGAT010095.2	93.14	0.83	noncode	682	50	554	20	15	78	623	544	1	0	797
MSTRG.74043.4	NONGGAT010095.2	93.14	0.83	noncode	682	50	554	20	15	78	623	544	1	0	797
MSTRG.19807.1	NONGGAT016648.1	95.26	1.01	noncode	210	50	211	9	1	1	210	328	538	1e-89	333
MSTRG.19807.1	NONGGAT016647.1	95.26	1.01	noncode	210	50	211	9	1	1	210	608	818	1e-89	333
MSTRG.19807.1	NONGGAT016648.1	95.26	1.01	noncode	210	50	211	9	1	1	210	328	538	1e-89	333
MSTRG.19807.1	NONGGAT016647.1	95.26	1.01	noncode	210	50	211	9	1	1	210	608	818	1e-89	333
MSTRG.19807.1	NONGGAT013012.1	94.74	1	noncode	210	50	209	11	0	2	210	2883	2675	2e-87	326
MSTRG.19807.1	NONGGAT013012.1	94.74	1	noncode	210	50	209	11	0	2	210	2883	2675	2e-87	326
MSTRG.19807.1	NONGGAT012413.1	94.63	0.98	noncode	210	50	205	11	0	1	205	2369	2573	3e-85	318
MSTRG.19807.1	NONGGAT001769.2	97.33	0.89	noncode	210	50	187	5	0	10	196	1117	931	3e-85	318
MSTRG.19807.1	NONGGAT012413.1	94.63	0.98	noncode	210	50	205	11	0	1	205	2369	2573	3e-85	318
MSTRG.19807.1	NONGGAT001769.2	97.33	0.89	noncode	210	50	187	5	0	10	196	1117	931	3e-85	318
MSTRG.19807.1	NONGGAT012594.1	93.84	1.01	noncode	210	50	211	12	1	1	210	775	985	1e-84	316
MSTRG.19807.1	NONGGAT012594.1	93.84	1.01	noncode	210	50	211	12	1	1	210	775	985	1e-84	316
MSTRG.19807.1	NONGGAT001309.2	93.3	1	noncode	210	50	209	13	1	3	210	3223	3431	6e-82	307
MSTRG.19807.1	NONGGAT001309.2	93.3	1	noncode	210	50	209	13	1	3	210	3223	3431	6e-82	307
MSTRG.19807.1	NONGGAT014020.1	93.17	0.99	noncode	210	50	205	12	2	1	205	1967	2169	1e-79	300
MSTRG.19807.1	NONGGAT014020.1	93.17	0.99	noncode	210	50	205	12	2	1	205	1967	2169	1e-79	300
MSTRG.19807.1	NONGGAT014506.1	92.38	1.01	noncode	210	50	210	12	3	2	210	1082	1288	1e-78	296
MSTRG.19807.1	NONGGAT014506.1	92.38	1.01	noncode	210	50	210	12	3	2	210	1082	1288	1e-78	296
MSTRG.19807.1	NONGGAT014535.1	92.72	1	noncode	210	50	206	12	3	6	210	1493	1290	4e-78	294
MSTRG.19807.1	NONGGAT014535.1	92.72	1	noncode	210	50	206	12	3	6	210	1493	1290	4e-78	294
MSTRG.19807.1	NONGGAT012006.2	91.43	1	noncode	210	50	210	17	1	1	209	1296	1087	8e-76	287
MSTRG.19807.1	NONGGAT012006.2	91.43	1	noncode	210	50	210	17	1	1	209	4919	4710	8e-76	287
MSTRG.19807.1	NONGGAT012006.2	91.43	1	noncode	210	50	210	17	1	1	209	8673	8464	8e-76	287
MSTRG.19807.1	NONGGAT012006.2	91.43	1	noncode	210	50	210	17	1	1	209	1296	1087	8e-76	287
MSTRG.19807.1	NONGGAT012006.2	91.43	1	noncode	210	50	210	17	1	1	209	4919	4710	8e-76	287
MSTRG.19807.1	NONGGAT012006.2	91.43	1	noncode	210	50	210	17	1	1	209	8673	8464	8e-76	287
MSTRG.19807.1	NONGGAT013979.1	91	1.01	noncode	210	50	211	17	2	1	210	1811	1602	1e-74	283
MSTRG.19807.1	NONGGAT013979.1	91	1.01	noncode	210	50	211	17	2	1	210	1811	1602	1e-74	283
MSTRG.19807.1	NONGGAT012967.1	94.97	0.85	noncode	210	50	179	9	0	1	179	219	41	3e-74	281
MSTRG.19807.1	NONGGAT012967.1	94.97	0.85	noncode	210	50	179	9	0	1	179	219	41	3e-74	281
MSTRG.19807.1	NONGGAT009068.2	91.84	0.95	noncode	210	50	196	12	3	2	196	488	680	8e-71	270
MSTRG.19807.1	NONGGAT009068.2	91.84	0.95	noncode	210	50	196	12	3	2	196	488	680	8e-71	270
MSTRG.19807.1	NONGGAT012962.1	89.57	1.01	noncode	210	50	211	21	1	1	210	3532	3742	1e-69	267
MSTRG.19807.1	NONGGAT012962.1	89.57	1.01	noncode	210	50	211	21	1	1	210	3532	3742	1e-69	267
MSTRG.19807.1	NONGGAT016668.1	92.18	0.85	noncode	210	50	179	14	0	1	179	144	322	8e-66	254
MSTRG.19807.1	NONGGAT016668.1	92.18	0.85	noncode	210	50	179	14	0	1	179	144	322	8e-66	254
MSTRG.132116.2	NONGGAT008506.2	100	0.99	noncode	1464	50	1445	0	0	20	1464	487	1931	0	2669
MSTRG.132116.2	NONGGAT008506.2	100	0.99	noncode	1464	50	1445	0	0	20	1464	487	1931	0	2669
MSTRG.132116.2	NONGGAT008508.2	100	0.99	noncode	1464	50	1444	0	0	21	1464	1016	2459	0	2667
MSTRG.132116.2	NONGGAT008508.2	100	0.99	noncode	1464	50	1444	0	0	21	1464	1016	2459	0	2667
MSTRG.85087.1	NONGGAT006075.2	100	0.9	noncode	242	50	219	0	0	24	242	1	219	2e-111	405
MSTRG.85087.1	NONGGAT006074.2	100	0.9	noncode	242	50	219	0	0	24	242	1	219	2e-111	405
MSTRG.85087.1	NONGGAT006075.2	100	0.9	noncode	242	50	219	0	0	24	242	1	219	2e-111	405
MSTRG.85087.1	NONGGAT006074.2	100	0.9	noncode	242	50	219	0	0	24	242	1	219	2e-111	405
MSTRG.47620.14	NONGGAT003673.2	99.47	1.01	noncode	748	50	752	0	1	1	748	2	753	0	1363
MSTRG.47620.14	NONGGAT003673.2	99.47	1.01	noncode	748	50	752	0	1	1	748	2	753	0	1363
MSTRG.47620.14	NONGGAT003675.2	98.94	1.01	noncode	748	50	756	0	1	1	748	2	757	0	1345
MSTRG.47620.14	NONGGAT003675.2	98.94	1.01	noncode	748	50	756	0	1	1	748	2	757	0	1345
MSTRG.152637.2	NONGGAT012028.2	100	0.83	noncode	209	50	174	0	0	36	209	366	539	2e-86	322
MSTRG.152637.2	NONGGAT012028.2	100	0.83	noncode	209	50	174	0	0	36	209	366	539	2e-86	322
MSTRG.2679.6	NONGGAT000206.2	100	0.89	noncode	2362	50	2091	0	0	262	2352	469	2559	0	3862
MSTRG.2679.6	NONGGAT000206.2	100	0.89	noncode	2362	50	2091	0	0	262	2352	469	2559	0	3862
MSTRG.96540.9	NONGGAT010335.2	98.2	0.82	noncode	1355	50	1113	20	0	243	1355	1	1113	0	1945
MSTRG.96540.9	NONGGAT010335.2	98.2	0.82	noncode	1355	50	1113	20	0	243	1355	1	1113	0	1945
MSTRG.96540.9	NONGGAT010344.2	90.72	0.85	noncode	1355	50	1142	88	10	220	1352	1	1133	0	1506
MSTRG.96540.9	NONGGAT010344.2	83.2	0.93	noncode	1355	50	1238	178	23	133	1355	1	1223	0	1107
MSTRG.96540.9	NONGGAT010344.2	90.72	0.85	noncode	1355	50	1142	88	10	220	1352	1	1133	0	1506
MSTRG.96540.9	NONGGAT010344.2	83.2	0.93	noncode	1355	50	1238	178	23	133	1355	1	1223	0	1107
MSTRG.96540.9	NONGGAT010332.2	83.76	0.85	noncode	1355	50	1139	157	21	231	1355	1	1125	0	1053
MSTRG.96540.9	NONGGAT010332.2	83.76	0.85	noncode	1355	50	1139	157	21	231	1355	1	1125	0	1053
MSTRG.110696.1	NONGGAT012480.1	86.42	1.04	noncode	293	50	302	31	2	1	293	1669	1369	3e-86	322
MSTRG.110696.1	NONGGAT012480.1	86.42	1.04	noncode	293	50	302	31	2	1	293	1669	1369	3e-86	322
MSTRG.110696.1	NONGGAT012202.1	87.03	1.02	noncode	293	50	293	20	6	1	292	278	3	5e-84	315
MSTRG.110696.1	NONGGAT012202.1	87.03	1.02	noncode	293	50	293	20	6	1	292	278	3	5e-84	315
MSTRG.139677.1	NONGGAT009113.2	100	0.92	noncode	1725	50	1589	0	0	118	1706	1	1589	0	2935
MSTRG.139677.1	NONGGAT009113.2	100	0.92	noncode	1725	50	1589	0	0	118	1706	1	1589	0	2935
MSTRG.116771.1	NONGGAT007518.2	100	0.85	noncode	275	50	235	0	0	1	235	41	275	3e-120	435
MSTRG.116771.1	NONGGAT007518.2	100	0.85	noncode	275	50	235	0	0	1	235	41	275	3e-120	435
MSTRG.19834.1	NONGGAT003795.2	98.6	0.85	noncode	252	50	214	3	0	1	214	283	496	1e-103	379
MSTRG.19834.1	NONGGAT003795.2	98.6	0.85	noncode	252	50	214	3	0	1	214	283	496	1e-103	379
MSTRG.131074.1	NONGGAT008447.2	100	1	noncode	288	50	288	0	0	1	288	371	658	1e-149	532
MSTRG.131074.1	NONGGAT008447.2	100	1	noncode	288	50	288	0	0	1	288	371	658	1e-149	532
MSTRG.131074.1	NONGGAT008446.2	100	0.85	noncode	288	50	244	0	0	45	288	340	583	4e-125	451
MSTRG.131074.1	NONGGAT008446.2	100	0.85	noncode	288	50	244	0	0	45	288	340	583	4e-125	451
MSTRG.66227.1	NONGGAT004621.2	100	1	noncode	282	50	282	0	0	1	282	213	494	3e-146	521
MSTRG.66227.1	NONGGAT004622.2	100	1	noncode	282	50	282	0	0	1	282	234	515	3e-146	521
MSTRG.66227.1	NONGGAT004621.2	100	1	noncode	282	50	282	0	0	1	282	213	494	3e-146	521
MSTRG.66227.1	NONGGAT004622.2	100	1	noncode	282	50	282	0	0	1	282	234	515	3e-146	521
MSTRG.144339.4	NONGGAT010165.2	94.39	0.81	noncode	2090	50	1675	61	11	416	2090	1758	117	0	2542
MSTRG.144339.4	NONGGAT010165.2	94.39	0.81	noncode	2090	50	1675	61	11	416	2090	1758	117	0	2542
MSTRG.804.1	NONGGAT000074.2	99.62	0.97	noncode	271	50	264	1	0	8	271	1	264	1e-134	483
MSTRG.804.1	NONGGAT000074.2	99.62	0.97	noncode	271	50	264	1	0	8	271	1	264	1e-134	483
MSTRG.2615.1	NONGGAT000202.2	100	0.94	noncode	803	50	758	0	0	1	758	1073	316	0	1400
MSTRG.2615.1	NONGGAT000202.2	100	0.94	noncode	803	50	758	0	0	1	758	1073	316	0	1400
MSTRG.96540.8	NONGGAT010335.2	98.47	0.99	noncode	1123	50	1113	17	0	11	1123	1	1113	0	1962
MSTRG.96540.8	NONGGAT010335.2	98.47	0.99	noncode	1123	50	1113	17	0	11	1123	1	1113	0	1962
MSTRG.96540.8	NONGGAT010346.2	96.84	0.9	noncode	1123	50	1013	30	2	112	1123	1	1012	0	1692
MSTRG.96540.8	NONGGAT010346.2	96.84	0.9	noncode	1123	50	1013	30	2	112	1123	1	1012	0	1692
MSTRG.96540.8	NONGGAT010344.2	90.7	1.01	noncode	1123	50	1129	87	10	1	1120	14	1133	0	1487
MSTRG.96540.8	NONGGAT010344.2	83.47	1.03	noncode	1123	50	1137	160	21	1	1123	101	1223	0	1033
MSTRG.96540.8	NONGGAT010344.2	90.7	1.01	noncode	1123	50	1129	87	10	1	1120	14	1133	0	1487
MSTRG.96540.8	NONGGAT010344.2	83.47	1.03	noncode	1123	50	1137	160	21	1	1123	101	1223	0	1033
MSTRG.96540.8	NONGGAT010332.2	90.8	0.94	noncode	1123	50	1044	78	10	86	1120	1	1035	0	1380
MSTRG.96540.8	NONGGAT010332.2	83.91	1.03	noncode	1123	50	1137	155	21	1	1123	3	1125	0	1061
MSTRG.96540.8	NONGGAT010332.2	90.8	0.94	noncode	1123	50	1044	78	10	86	1120	1	1035	0	1380
MSTRG.96540.8	NONGGAT010332.2	83.91	1.03	noncode	1123	50	1137	155	21	1	1123	3	1125	0	1061
MSTRG.96540.7	NONGGAT010344.2	90	0.83	noncode	1407	50	1150	93	14	263	1401	1	1139	0	1467
MSTRG.96540.7	NONGGAT010344.2	83.03	0.91	noncode	1407	50	1249	178	27	176	1407	1	1232	0	1101
MSTRG.96540.7	NONGGAT010344.2	90	0.83	noncode	1407	50	1150	93	14	263	1401	1	1139	0	1467
MSTRG.96540.7	NONGGAT010344.2	83.03	0.91	noncode	1407	50	1249	178	27	176	1407	1	1232	0	1101
MSTRG.96540.7	NONGGAT010332.2	83.3	0.83	noncode	1407	50	1150	160	25	274	1407	1	1134	0	1031
MSTRG.96540.7	NONGGAT010332.2	83.3	0.83	noncode	1407	50	1150	160	25	274	1407	1	1134	0	1031
MSTRG.95829.1	NONGGAT006581.2	100	0.93	noncode	342	50	317	0	0	26	342	279	595	1e-165	586
MSTRG.95829.1	NONGGAT006581.2	100	0.93	noncode	342	50	317	0	0	26	342	279	595	1e-165	586
MSTRG.96229.1	NONGGAT010402.2	97.99	0.99	noncode	754	50	747	12	3	7	752	1026	282	0	1293
MSTRG.96229.1	NONGGAT010402.2	97.99	0.99	noncode	754	50	747	12	3	7	752	1026	282	0	1293
MSTRG.50989.1	NONGGAT003825.2	100	1	noncode	319	50	319	0	0	1	319	813	1131	8e-167	590
MSTRG.50989.1	NONGGAT003825.2	100	1	noncode	319	50	319	0	0	1	319	813	1131	8e-167	590
MSTRG.129515.1	NONGGAT008331.2	100	0.83	noncode	434	50	361	0	0	1	361	159	519	0	667
MSTRG.129515.1	NONGGAT008331.2	100	0.83	noncode	434	50	361	0	0	1	361	159	519	0	667
MSTRG.41715.22	NONGGAT003016.2	93.09	0.91	noncode	866	50	781	25	9	69	825	776	1	0	1116
MSTRG.41715.22	NONGGAT003016.2	93.09	0.91	noncode	866	50	781	25	9	69	825	776	1	0	1116
MSTRG.95915.2	NONGGAT016083.1	83.72	0.92	noncode	523	50	473	61	10	1	470	460	1	2e-119	433
MSTRG.95915.2	NONGGAT016083.1	83.72	0.92	noncode	523	50	473	61	10	1	470	460	1	2e-119	433
MSTRG.107632.1	NONGGAT007055.2	100	0.93	noncode	2439	50	2257	0	0	47	2303	11	2267	0	4169
MSTRG.107632.1	NONGGAT007055.2	100	0.93	noncode	2439	50	2257	0	0	47	2303	11	2267	0	4169
MSTRG.52879.1	NONGGAT003899.2	100	1	noncode	208	50	208	0	0	1	208	199	406	3e-105	385
MSTRG.52879.1	NONGGAT003898.2	100	1	noncode	208	50	208	0	0	1	208	109	316	3e-105	385
MSTRG.52879.1	NONGGAT003899.2	100	1	noncode	208	50	208	0	0	1	208	199	406	3e-105	385
MSTRG.52879.1	NONGGAT003898.2	100	1	noncode	208	50	208	0	0	1	208	109	316	3e-105	385
MSTRG.91250.1	NONGGAT006352.2	96.77	1	noncode	310	50	310	10	0	1	310	699	1008	4e-145	518
MSTRG.91250.1	NONGGAT006352.2	96.77	1	noncode	310	50	310	10	0	1	310	699	1008	4e-145	518
MSTRG.96540.12	NONGGAT010344.2	99.74	1	noncode	781	50	781	2	0	1	781	163	943	0	1432
MSTRG.96540.12	NONGGAT010344.2	99.74	1	noncode	781	50	781	2	0	1	781	163	943	0	1432
MSTRG.96540.12	NONGGAT010332.2	99.1	1	noncode	781	50	781	7	0	1	781	65	845	0	1404
MSTRG.96540.12	NONGGAT010332.2	99.1	1	noncode	781	50	781	7	0	1	781	65	845	0	1404
MSTRG.96540.12	NONGGAT010335.2	94.59	0.95	noncode	781	50	739	32	2	1	739	140	870	0	1136
MSTRG.96540.12	NONGGAT010335.2	94.59	0.95	noncode	781	50	739	32	2	1	739	140	870	0	1136
MSTRG.96540.12	NONGGAT010346.2	93.22	0.95	noncode	781	50	738	40	4	3	739	41	769	0	1077
MSTRG.96540.12	NONGGAT010346.2	93.22	0.95	noncode	781	50	738	40	4	3	739	41	769	0	1077
MSTRG.78977.2	NONGGAT005718.2	100	1	noncode	315	50	315	0	0	1	315	85	399	1e-164	582
MSTRG.78977.2	NONGGAT005718.2	100	1	noncode	315	50	315	0	0	1	315	85	399	1e-164	582
MSTRG.139722.1	NONGGAT009118.2	100	0.85	noncode	2276	50	1926	0	0	331	2256	1	1926	0	3557
MSTRG.139722.1	NONGGAT009118.2	100	0.85	noncode	2276	50	1926	0	0	331	2256	1	1926	0	3557
MSTRG.71703.3	NONGGAT005126.2	100	1	noncode	504	50	504	0	0	1	504	234	737	0	931
MSTRG.71703.3	NONGGAT005126.2	100	1	noncode	504	50	504	0	0	1	504	234	737	0	931
MSTRG.71703.3	NONGGAT005128.2	100	0.92	noncode	504	50	466	0	0	39	504	325	790	0	861
MSTRG.71703.3	NONGGAT005128.2	100	0.92	noncode	504	50	466	0	0	39	504	325	790	0	861
MSTRG.71703.3	NONGGAT005127.2	100	0.89	noncode	504	50	448	0	0	57	504	36	483	0	828
MSTRG.71703.3	NONGGAT005127.2	100	0.89	noncode	504	50	448	0	0	57	504	36	483	0	828
MSTRG.71703.3	NONGGAT005125.2	100	0.88	noncode	504	50	445	0	0	60	504	272	716	0	822
MSTRG.71703.3	NONGGAT005125.2	100	0.88	noncode	504	50	445	0	0	60	504	272	716	0	822
MSTRG.44066.1	NONGGAT003270.2	100	0.84	noncode	212	50	178	0	0	1	178	2146	1969	1e-88	329
MSTRG.44066.1	NONGGAT003270.2	100	0.84	noncode	212	50	178	0	0	1	178	2146	1969	1e-88	329
MSTRG.50570.2	NONGGAT003802.2	99.52	1	noncode	416	50	416	2	0	1	416	129	544	0	758
MSTRG.50570.2	NONGGAT003802.2	99.52	1	noncode	416	50	416	2	0	1	416	129	544	0	758
MSTRG.50570.2	NONGGAT003801.2	99.44	0.86	noncode	416	50	359	2	0	58	416	156	514	0	652
MSTRG.50570.2	NONGGAT003801.2	99.44	0.86	noncode	416	50	359	2	0	58	416	156	514	0	652
MSTRG.146749.1	NONGGAT014535.1	88.93	1.03	noncode	561	50	569	53	6	1	561	975	1541	0	693
MSTRG.146749.1	NONGGAT014535.1	88.93	1.03	noncode	561	50	569	53	6	1	561	975	1541	0	693
MSTRG.146749.1	NONGGAT016647.1	88.54	1.02	noncode	561	50	567	55	4	1	558	1133	568	0	678
MSTRG.146749.1	NONGGAT016647.1	88.54	1.02	noncode	561	50	567	55	4	1	558	1133	568	0	678
MSTRG.146749.1	NONGGAT012962.1	87.65	1.01	noncode	561	50	567	62	2	1	559	4057	3491	0	652
MSTRG.146749.1	NONGGAT012962.1	87.65	1.01	noncode	561	50	567	62	2	1	559	4057	3491	0	652
MSTRG.146749.1	NONGGAT012006.2	87.46	1.02	noncode	561	50	566	62	6	4	561	775	1339	0	643
MSTRG.146749.1	NONGGAT012006.2	87.46	1.02	noncode	561	50	566	62	6	4	561	8152	8716	0	643
MSTRG.146749.1	NONGGAT012006.2	87.28	1.02	noncode	561	50	566	63	6	4	561	4398	4962	0	638
MSTRG.146749.1	NONGGAT012006.2	87.46	1.02	noncode	561	50	566	62	6	4	561	775	1339	0	643
MSTRG.146749.1	NONGGAT012006.2	87.46	1.02	noncode	561	50	566	62	6	4	561	8152	8716	0	643
MSTRG.146749.1	NONGGAT012006.2	87.28	1.02	noncode	561	50	566	63	6	4	561	4398	4962	0	638
MSTRG.70601.1	NONGGAT004998.2	99.84	0.82	noncode	762	50	625	1	0	1	625	2617	3241	0	1149
MSTRG.70601.1	NONGGAT004997.2	99.84	0.82	noncode	762	50	625	1	0	1	625	2594	3218	0	1149
MSTRG.70601.1	NONGGAT004996.2	99.84	0.82	noncode	762	50	625	1	0	1	625	2419	3043	0	1149
MSTRG.70601.1	NONGGAT004998.2	99.84	0.82	noncode	762	50	625	1	0	1	625	2617	3241	0	1149
MSTRG.70601.1	NONGGAT004997.2	99.84	0.82	noncode	762	50	625	1	0	1	625	2594	3218	0	1149
MSTRG.70601.1	NONGGAT004996.2	99.84	0.82	noncode	762	50	625	1	0	1	625	2419	3043	0	1149
MSTRG.33100.14	NONGGAT010613.2	86.15	0.82	noncode	1130	50	910	68	24	222	1113	12	881	0	929
MSTRG.33100.14	NONGGAT010613.2	86.15	0.82	noncode	1130	50	910	68	24	222	1113	12	881	0	929
MSTRG.26523.1	NONGGAT014535.1	90.4	1	noncode	355	50	354	33	1	1	353	1480	1127	6e-129	464
MSTRG.26523.1	NONGGAT014535.1	90.4	1	noncode	355	50	354	33	1	1	353	1480	1127	6e-129	464
MSTRG.26523.1	NONGGAT014020.1	92.63	0.88	noncode	355	50	312	22	1	1	311	1985	2296	6e-124	448
MSTRG.26523.1	NONGGAT014020.1	92.63	0.88	noncode	355	50	312	22	1	1	311	1985	2296	6e-124	448
MSTRG.26523.1	NONGGAT016647.1	89.3	1.01	noncode	355	50	355	36	2	1	353	627	981	8e-123	444
MSTRG.26523.1	NONGGAT016647.1	89.3	1.01	noncode	355	50	355	36	2	1	353	627	981	8e-123	444
MSTRG.26523.1	NONGGAT012594.1	88.39	1	noncode	355	50	353	37	3	3	353	796	1146	4e-116	422
MSTRG.26523.1	NONGGAT012594.1	88.39	1	noncode	355	50	353	37	3	3	353	796	1146	4e-116	422
MSTRG.26523.1	NONGGAT002514.2	88.92	0.97	noncode	355	50	343	35	3	1	341	348	7	1e-115	420
MSTRG.26523.1	NONGGAT002514.2	88.92	0.97	noncode	355	50	343	35	3	1	341	348	7	1e-115	420
MSTRG.26523.1	NONGGAT012962.1	87.57	0.98	noncode	355	50	346	41	2	10	353	3560	3905	2e-109	399
MSTRG.26523.1	NONGGAT012962.1	87.57	0.98	noncode	355	50	346	41	2	10	353	3560	3905	2e-109	399
MSTRG.26523.1	NONGGAT014506.1	87.29	0.83	noncode	355	50	291	30	5	3	290	1102	1388	3e-87	326
MSTRG.26523.1	NONGGAT014506.1	87.29	0.83	noncode	355	50	291	30	5	3	290	1102	1388	3e-87	326
MSTRG.95915.1	NONGGAT016083.1	83.51	0.86	noncode	559	50	473	62	10	1	470	460	1	1e-117	427
MSTRG.95915.1	NONGGAT016083.1	83.51	0.86	noncode	559	50	473	62	10	1	470	460	1	1e-117	427
MSTRG.66474.1	NONGGAT014780.1	94.02	1.01	noncode	233	50	234	13	1	1	233	922	689	8e-96	353
MSTRG.66474.1	NONGGAT001188.2	94.02	1.01	noncode	233	50	234	13	1	1	233	416	183	8e-96	353
MSTRG.66474.1	NONGGAT014780.1	94.02	1.01	noncode	233	50	234	13	1	1	233	922	689	8e-96	353
MSTRG.66474.1	NONGGAT001188.2	94.02	1.01	noncode	233	50	234	13	1	1	233	416	183	8e-96	353
MSTRG.66474.1	NONGGAT012480.1	93.22	1.02	noncode	233	50	236	13	2	1	233	930	1165	5e-93	344
MSTRG.66474.1	NONGGAT012480.1	93.22	1.02	noncode	233	50	236	13	2	1	233	930	1165	5e-93	344
MSTRG.66474.1	NONGGAT005571.2	90.56	1	noncode	233	50	233	19	1	1	233	952	723	2e-81	305
MSTRG.66474.1	NONGGAT005569.2	90.56	1	noncode	233	50	233	19	1	1	233	952	723	2e-81	305
MSTRG.66474.1	NONGGAT005571.2	90.56	1	noncode	233	50	233	19	1	1	233	952	723	2e-81	305
MSTRG.66474.1	NONGGAT005569.2	90.56	1	noncode	233	50	233	19	1	1	233	952	723	2e-81	305
MSTRG.24653.2	NONGGAT001651.2	100	0.84	noncode	3364	50	2824	0	0	540	3363	1	2824	0	5216
MSTRG.24653.2	NONGGAT001651.2	100	0.84	noncode	3364	50	2824	0	0	540	3363	1	2824	0	5216
MSTRG.116735.3	NONGGAT007513.2	100	0.81	noncode	1451	50	1181	0	0	271	1451	2383	3563	0	2182
MSTRG.116735.3	NONGGAT007513.2	100	0.81	noncode	1451	50	1181	0	0	271	1451	2383	3563	0	2182
MSTRG.95734.1	NONGGAT014020.1	94.89	0.99	noncode	336	50	333	17	0	2	334	1921	2253	3e-146	521
MSTRG.95734.1	NONGGAT014020.1	94.89	0.99	noncode	336	50	333	17	0	2	334	1921	2253	3e-146	521
MSTRG.95734.1	NONGGAT014535.1	94.85	0.98	noncode	336	50	330	17	0	3	332	1543	1214	1e-144	516
MSTRG.95734.1	NONGGAT014535.1	94.85	0.98	noncode	336	50	330	17	0	3	332	1543	1214	1e-144	516
MSTRG.95734.1	NONGGAT001309.2	91.9	0.96	noncode	336	50	321	22	3	1	319	3176	3494	2e-123	446
MSTRG.95734.1	NONGGAT001309.2	91.9	0.96	noncode	336	50	321	22	3	1	319	3176	3494	2e-123	446
MSTRG.95734.1	NONGGAT016647.1	90.83	0.98	noncode	336	50	327	28	2	8	332	568	894	1e-120	436
MSTRG.95734.1	NONGGAT016647.1	90.83	0.98	noncode	336	50	327	28	2	8	332	568	894	1e-120	436
MSTRG.95734.1	NONGGAT002514.2	89.94	0.99	noncode	336	50	328	27	6	12	336	402	78	4e-115	418
MSTRG.95734.1	NONGGAT002514.2	89.94	0.99	noncode	336	50	328	27	6	12	336	402	78	4e-115	418
MSTRG.95734.1	NONGGAT012594.1	88.46	1.02	noncode	336	50	338	33	4	1	336	730	1063	1e-110	403
MSTRG.95734.1	NONGGAT012594.1	88.46	1.02	noncode	336	50	338	33	4	1	336	730	1063	1e-110	403
MSTRG.95734.1	NONGGAT014506.1	88.32	1.01	noncode	336	50	334	34	4	5	336	1038	1368	2e-108	396
MSTRG.95734.1	NONGGAT014506.1	88.32	1.01	noncode	336	50	334	34	4	5	336	1038	1368	2e-108	396
MSTRG.95734.1	NONGGAT012962.1	87.76	1	noncode	336	50	335	39	2	1	333	3485	3819	9e-107	390
MSTRG.95734.1	NONGGAT012962.1	87.76	1	noncode	336	50	335	39	2	1	333	3485	3819	9e-107	390
MSTRG.95734.1	NONGGAT012413.1	89.17	0.95	noncode	336	50	314	30	4	2	312	2323	2635	3e-106	388
MSTRG.95734.1	NONGGAT012413.1	89.17	0.95	noncode	336	50	314	30	4	2	312	2323	2635	3e-106	388
MSTRG.95734.1	NONGGAT013012.1	90.71	0.81	noncode	336	50	269	23	2	1	267	2931	2663	9e-97	357
MSTRG.95734.1	NONGGAT013012.1	90.71	0.81	noncode	336	50	269	23	2	1	267	2931	2663	9e-97	357
MSTRG.95734.1	NONGGAT013979.1	88.04	0.83	noncode	336	50	276	30	3	1	274	1858	1584	1e-86	324
MSTRG.95734.1	NONGGAT013979.1	88.04	0.83	noncode	336	50	276	30	3	1	274	1858	1584	1e-86	324
MSTRG.47543.4	NONGGAT003660.2	100	0.84	noncode	1621	50	1360	0	0	262	1621	523	1882	0	2512
MSTRG.47543.4	NONGGAT003660.2	100	0.84	noncode	1621	50	1360	0	0	262	1621	523	1882	0	2512
MSTRG.22463.21	NONGGAT001481.2	96.34	0.87	noncode	569	50	492	17	1	1	491	739	248	0	808
MSTRG.22463.21	NONGGAT001481.2	96.34	0.87	noncode	569	50	492	17	1	1	491	739	248	0	808
MSTRG.22466.3	NONGGAT001481.2	91.43	0.99	noncode	283	50	280	24	0	1	280	1782	1503	4e-105	385
MSTRG.22466.3	NONGGAT001481.2	84.81	1.06	noncode	283	50	283	13	16	2	283	1146	893	8e-67	257
MSTRG.22466.3	NONGGAT001481.2	91.43	0.99	noncode	283	50	280	24	0	1	280	1782	1503	4e-105	385
MSTRG.22466.3	NONGGAT001481.2	84.81	1.06	noncode	283	50	283	13	16	2	283	1146	893	8e-67	257
MSTRG.19476.1	NONGGAT005793.2	88.67	0.97	noncode	210	50	203	23	0	6	208	3176	3378	4e-64	248
MSTRG.19476.1	NONGGAT005793.2	88.67	0.97	noncode	210	50	203	23	0	6	208	3176	3378	4e-64	248
MSTRG.38665.1	NONGGAT002686.2	99.52	0.98	noncode	852	50	835	0	1	22	852	1	835	0	1517
MSTRG.38665.1	NONGGAT002686.2	99.52	0.98	noncode	852	50	835	0	1	22	852	1	835	0	1517
MSTRG.131307.1	NONGGAT008474.2	100	0.91	noncode	502	50	458	0	0	1	458	175	632	0	846
MSTRG.131307.1	NONGGAT008474.2	100	0.91	noncode	502	50	458	0	0	1	458	175	632	0	846
MSTRG.22463.7	NONGGAT005793.2	86.57	0.99	noncode	340	50	335	41	3	9	340	3570	3237	2e-99	366
MSTRG.22463.7	NONGGAT005793.2	86.57	0.99	noncode	340	50	335	41	3	9	340	3570	3237	2e-99	366
MSTRG.22463.7	NONGGAT013298.1	90.25	0.82	noncode	340	50	277	25	2	13	287	1533	1809	7e-98	361
MSTRG.22463.7	NONGGAT013298.1	90.25	0.82	noncode	340	50	277	25	2	13	287	1533	1809	7e-98	361
MSTRG.22463.7	NONGGAT006590.2	87.7	0.94	noncode	340	50	309	13	10	21	327	1904	1619	1e-90	337
MSTRG.22463.7	NONGGAT006590.2	87.7	0.94	noncode	340	50	309	13	10	21	327	1904	1619	1e-90	337
MSTRG.22438.1	NONGGAT001481.2	95.83	0.93	noncode	387	50	360	13	1	9	366	1977	1618	6e-164	580
MSTRG.22438.1	NONGGAT001481.2	95.83	0.93	noncode	387	50	360	13	1	9	366	1977	1618	6e-164	580
MSTRG.129146.1	NONGGAT014020.1	96.22	1	noncode	238	50	238	8	1	2	238	2161	1924	2e-106	388
MSTRG.129146.1	NONGGAT014020.1	96.22	1	noncode	238	50	238	8	1	2	238	2161	1924	2e-106	388
MSTRG.129146.1	NONGGAT014535.1	95.38	1	noncode	238	50	238	10	1	2	238	1304	1541	5e-103	377
MSTRG.129146.1	NONGGAT014535.1	95.38	1	noncode	238	50	238	10	1	2	238	1304	1541	5e-103	377
MSTRG.129146.1	NONGGAT001769.2	93.1	0.98	noncode	238	50	232	15	1	3	233	931	1162	2e-91	339
MSTRG.129146.1	NONGGAT001769.2	93.1	0.98	noncode	238	50	232	15	1	3	233	931	1162	2e-91	339
MSTRG.129146.1	NONGGAT009068.2	91.91	1	noncode	238	50	235	14	4	3	234	680	448	7e-87	324
MSTRG.129146.1	NONGGAT009068.2	91.91	1	noncode	238	50	235	14	4	3	234	680	448	7e-87	324
MSTRG.129146.1	NONGGAT016647.1	91.53	1	noncode	238	50	236	17	3	2	234	804	569	2e-86	322
MSTRG.129146.1	NONGGAT016647.1	91.53	1	noncode	238	50	236	17	3	2	234	804	569	2e-86	322
MSTRG.129146.1	NONGGAT001309.2	91.49	1	noncode	238	50	235	17	3	2	233	3417	3183	9e-86	320
MSTRG.129146.1	NONGGAT001309.2	91.49	1	noncode	238	50	235	17	3	2	233	3417	3183	9e-86	320
MSTRG.129146.1	NONGGAT002514.2	91.38	0.98	noncode	238	50	232	18	2	2	231	171	402	1e-84	316
MSTRG.129146.1	NONGGAT002514.2	91.38	0.98	noncode	238	50	232	18	2	2	231	171	402	1e-84	316
MSTRG.129146.1	NONGGAT012413.1	89.58	1.02	noncode	238	50	240	22	3	2	238	2565	2326	3e-80	302
MSTRG.129146.1	NONGGAT012413.1	89.58	1.02	noncode	238	50	240	22	3	2	238	2565	2326	3e-80	302
MSTRG.129146.1	NONGGAT013012.1	89.17	1.02	noncode	238	50	240	23	3	2	238	2688	2927	1e-78	296
MSTRG.129146.1	NONGGAT013012.1	89.17	1.02	noncode	238	50	240	23	3	2	238	2688	2927	1e-78	296
MSTRG.129146.1	NONGGAT014506.1	88.7	1.02	noncode	238	50	239	23	4	2	238	1274	1038	2e-76	289
MSTRG.129146.1	NONGGAT014506.1	88.7	1.02	noncode	238	50	239	23	4	2	238	1274	1038	2e-76	289
MSTRG.129146.1	NONGGAT012594.1	88.94	1	noncode	238	50	235	23	3	2	233	971	737	9e-76	287
MSTRG.129146.1	NONGGAT012594.1	88.94	1	noncode	238	50	235	23	3	2	233	971	737	9e-76	287
MSTRG.129146.1	NONGGAT012967.1	90.13	0.96	noncode	238	50	223	17	5	20	238	41	262	3e-75	285
MSTRG.129146.1	NONGGAT012967.1	90.13	0.96	noncode	238	50	223	17	5	20	238	41	262	3e-75	285
MSTRG.129146.1	NONGGAT016648.1	92.42	0.84	noncode	238	50	198	13	2	2	197	524	327	4e-74	281
MSTRG.129146.1	NONGGAT016648.1	92.42	0.84	noncode	238	50	198	13	2	2	197	524	327	4e-74	281
MSTRG.129146.1	NONGGAT013979.1	87.03	1.01	noncode	238	50	239	29	2	2	238	1616	1854	3e-70	268
MSTRG.129146.1	NONGGAT012962.1	87.61	1	noncode	238	50	234	26	3	2	232	3728	3495	3e-70	268
MSTRG.129146.1	NONGGAT013979.1	87.03	1.01	noncode	238	50	239	29	2	2	238	1616	1854	3e-70	268
MSTRG.129146.1	NONGGAT012962.1	87.61	1	noncode	238	50	234	26	3	2	232	3728	3495	3e-70	268
MSTRG.129146.1	NONGGAT016668.1	88.29	0.94	noncode	238	50	222	23	3	20	238	322	101	1e-68	263
MSTRG.129146.1	NONGGAT016668.1	88.29	0.94	noncode	238	50	222	23	3	20	238	322	101	1e-68	263
MSTRG.129146.1	NONGGAT016115.1	89.9	0.85	noncode	238	50	198	16	4	41	234	170	367	3e-65	252
MSTRG.129146.1	NONGGAT016115.1	89.9	0.85	noncode	238	50	198	16	4	41	234	170	367	3e-65	252
MSTRG.129146.1	NONGGAT013049.1	89.45	0.85	noncode	238	50	199	17	4	43	238	1332	1135	4e-64	248
MSTRG.129146.1	NONGGAT013049.1	89.45	0.85	noncode	238	50	199	17	4	43	238	1332	1135	4e-64	248
MSTRG.147643.151	NONGGAT011786.2	99.12	1	noncode	2273	50	2275	10	9	1	2273	1695	3961	0	4082
MSTRG.147643.151	NONGGAT011786.2	99.12	1	noncode	2273	50	2275	10	9	1	2273	1695	3961	0	4082
MSTRG.52124.2	NONGGAT013777.1	100	0.82	noncode	677	50	557	0	0	121	677	322	878	0	1029
MSTRG.52124.2	NONGGAT013776.1	100	0.82	noncode	677	50	557	0	0	121	677	338	894	0	1029
MSTRG.52124.2	NONGGAT013774.1	100	0.82	noncode	677	50	557	0	0	121	677	322	878	0	1029
MSTRG.52124.2	NONGGAT013773.1	100	0.82	noncode	677	50	557	0	0	121	677	338	894	0	1029
MSTRG.52124.2	NONGGAT013771.1	100	0.82	noncode	677	50	557	0	0	121	677	322	878	0	1029
MSTRG.52124.2	NONGGAT013770.1	100	0.82	noncode	677	50	557	0	0	121	677	338	894	0	1029
MSTRG.52124.2	NONGGAT013777.1	100	0.82	noncode	677	50	557	0	0	121	677	322	878	0	1029
MSTRG.52124.2	NONGGAT013776.1	100	0.82	noncode	677	50	557	0	0	121	677	338	894	0	1029
MSTRG.52124.2	NONGGAT013774.1	100	0.82	noncode	677	50	557	0	0	121	677	322	878	0	1029
MSTRG.52124.2	NONGGAT013773.1	100	0.82	noncode	677	50	557	0	0	121	677	338	894	0	1029
MSTRG.52124.2	NONGGAT013771.1	100	0.82	noncode	677	50	557	0	0	121	677	322	878	0	1029
MSTRG.52124.2	NONGGAT013770.1	100	0.82	noncode	677	50	557	0	0	121	677	338	894	0	1029
MSTRG.138817.1	NONGGAT009019.2	100	1	noncode	2580	50	2580	0	0	1	2580	176	2755	0	4765
MSTRG.138817.1	NONGGAT009019.2	100	1	noncode	2580	50	2580	0	0	1	2580	176	2755	0	4765
MSTRG.20058.1	NONGGAT001266.2	100	1	noncode	222	50	222	0	0	1	222	34	255	5e-113	411
MSTRG.20058.1	NONGGAT001266.2	100	1	noncode	222	50	222	0	0	1	222	34	255	5e-113	411
MSTRG.47620.1	NONGGAT003673.2	100	0.95	noncode	801	50	761	0	0	41	801	1	761	0	1406
MSTRG.47620.1	NONGGAT003673.2	100	0.95	noncode	801	50	761	0	0	41	801	1	761	0	1406
MSTRG.47620.1	NONGGAT003675.2	99.48	0.96	noncode	801	50	765	0	1	41	801	1	765	0	1387
MSTRG.47620.1	NONGGAT003675.2	99.48	0.96	noncode	801	50	765	0	1	41	801	1	765	0	1387
MSTRG.7210.1	NONGGAT000484.2	100	1	noncode	316	50	316	0	0	1	316	65	380	4e-165	584
MSTRG.7210.1	NONGGAT000484.2	100	1	noncode	316	50	316	0	0	1	316	65	380	4e-165	584
MSTRG.31194.4	NONGGAT002162.2	99.92	0.89	noncode	1472	50	1310	0	1	98	1407	114	1422	0	2412
MSTRG.31194.4	NONGGAT002162.2	99.92	0.89	noncode	1472	50	1310	0	1	98	1407	114	1422	0	2412
MSTRG.41646.3	NONRATT031966.1	97.35	1.01	noncode	973	50	981	18	6	1	973	1867	887	0	1661
MSTRG.41646.3	NONRATT031966.1	97.35	1.01	noncode	973	50	981	18	6	1	973	1867	887	0	1661
MSTRG.41646.3	NONHSAT222441.1	97.25	1.01	noncode	973	50	981	19	6	1	973	1864	884	0	1655
MSTRG.41646.3	NONHSAT193358.1	97.25	1.01	noncode	973	50	981	19	6	1	973	1864	884	0	1655
MSTRG.41646.3	NONHSAT193357.1	97.25	1.01	noncode	973	50	981	19	6	1	973	5522	4542	0	1655
MSTRG.41646.3	NONHSAT190640.1	97.25	1.01	noncode	973	50	981	19	6	1	973	1864	884	0	1655
MSTRG.41646.3	NONHSAT190639.1	97.25	1.01	noncode	973	50	981	19	6	1	973	1864	884	0	1655
MSTRG.41646.3	NONHSAT190635.1	97.25	1.01	noncode	973	50	981	19	6	1	973	1864	884	0	1655
MSTRG.41646.3	NONHSAT135873.2	97.25	1.01	noncode	973	50	981	19	6	1	973	5518	4538	0	1655
MSTRG.41646.3	NONHSAT222441.1	97.25	1.01	noncode	973	50	981	19	6	1	973	1864	884	0	1655
MSTRG.41646.3	NONHSAT193358.1	97.25	1.01	noncode	973	50	981	19	6	1	973	1864	884	0	1655
MSTRG.41646.3	NONHSAT193357.1	97.25	1.01	noncode	973	50	981	19	6	1	973	5522	4542	0	1655
MSTRG.41646.3	NONHSAT190640.1	97.25	1.01	noncode	973	50	981	19	6	1	973	1864	884	0	1655
MSTRG.41646.3	NONHSAT190639.1	97.25	1.01	noncode	973	50	981	19	6	1	973	1864	884	0	1655
MSTRG.41646.3	NONHSAT190635.1	97.25	1.01	noncode	973	50	981	19	6	1	973	1864	884	0	1655
MSTRG.41646.3	NONHSAT135873.2	97.25	1.01	noncode	973	50	981	19	6	1	973	5518	4538	0	1655
MSTRG.41646.3	NONBTAT029806.1	97.25	1.02	noncode	973	50	982	18	7	1	973	1865	884	0	1655
MSTRG.41646.3	NONBTAT015719.2	97.25	1.02	noncode	973	50	982	18	7	1	973	1865	884	0	1655
MSTRG.41646.3	NONBTAT015718.2	97.25	1.02	noncode	973	50	982	18	7	1	973	1865	884	0	1655
MSTRG.41646.3	NONBTAT015717.2	97.25	1.02	noncode	973	50	982	18	7	1	973	1865	884	0	1655
MSTRG.41646.3	NONBTAT029806.1	97.25	1.02	noncode	973	50	982	18	7	1	973	1865	884	0	1655
MSTRG.41646.3	NONBTAT015719.2	97.25	1.02	noncode	973	50	982	18	7	1	973	1865	884	0	1655
MSTRG.41646.3	NONBTAT015718.2	97.25	1.02	noncode	973	50	982	18	7	1	973	1865	884	0	1655
MSTRG.41646.3	NONBTAT015717.2	97.25	1.02	noncode	973	50	982	18	7	1	973	1865	884	0	1655
MSTRG.41646.3	NONMMUT029642.2	94.69	1.03	noncode	973	50	980	19	17	1	973	5200	4247	0	1491
MSTRG.41646.3	NONMMUT029642.2	94.69	1.03	noncode	973	50	980	19	17	1	973	5200	4247	0	1491
MSTRG.41646.3	NONMMUT029667.2	96.94	0.84	noncode	973	50	817	18	5	164	973	1701	885	0	1363
MSTRG.41646.3	NONMMUT029667.2	96.94	0.84	noncode	973	50	817	18	5	164	973	1701	885	0	1363
MSTRG.41646.3	NONHSAT191165.1	97.35	0.82	noncode	973	50	793	14	5	188	973	1	793	0	1341
MSTRG.41646.3	NONHSAT191164.1	97.35	0.82	noncode	973	50	793	14	5	188	973	1	793	0	1341
MSTRG.41646.3	NONHSAT191162.1	97.35	0.82	noncode	973	50	793	14	5	188	973	1	793	0	1341
MSTRG.41646.3	NONHSAT191165.1	97.35	0.82	noncode	973	50	793	14	5	188	973	1	793	0	1341
MSTRG.41646.3	NONHSAT191164.1	97.35	0.82	noncode	973	50	793	14	5	188	973	1	793	0	1341
MSTRG.41646.3	NONHSAT191162.1	97.35	0.82	noncode	973	50	793	14	5	188	973	1	793	0	1341
MSTRG.41646.3	NONMMUT102084.1	96.85	0.82	noncode	973	50	793	18	5	188	973	1	793	0	1319
MSTRG.41646.3	NONHSAT191163.1	96.85	0.82	noncode	973	50	794	16	6	188	973	1	793	0	1319
MSTRG.41646.3	NONMMUT102084.1	96.85	0.82	noncode	973	50	793	18	5	188	973	1	793	0	1319
MSTRG.41646.3	NONHSAT191163.1	96.85	0.82	noncode	973	50	794	16	6	188	973	1	793	0	1319
MSTRG.41646.3	NONATHG002169.1	80.97	1.06	noncode	973	1808	993	149	38	1	973	1803	831	0	750
MSTRG.41646.3	NONATHG002169.1	80.97	1.06	noncode	973	1808	993	149	38	1	973	1803	831	0	750
MSTRG.41646.3	NONATHG000930.1	80.87	1.06	noncode	973	1808	993	150	38	1	973	1803	831	0	745
MSTRG.41646.3	NONATHG000930.1	80.87	1.06	noncode	973	1808	993	150	38	1	973	1803	831	0	745
MSTRG.41646.3	NONCELT001394.2	83.58	0.83	noncode	973	50	798	114	14	152	945	1604	820	0	732
MSTRG.41646.3	NONCELT001387.2	83.58	0.83	noncode	973	50	798	114	14	152	945	1604	820	0	732
MSTRG.41646.3	NONCELT001394.2	83.58	0.83	noncode	973	50	798	114	14	152	945	1604	820	0	732
MSTRG.41646.3	NONCELT001387.2	83.58	0.83	noncode	973	50	798	114	14	152	945	1604	820	0	732
MSTRG.41646.3	NONSCET000298.2	80.49	1.03	noncode	973	50	984	166	21	1	973	1795	827	0	730
MSTRG.41646.3	NONSCET000293.2	80.49	1.03	noncode	973	50	984	166	21	1	973	1795	827	0	730
MSTRG.41646.3	NONSCET000298.2	80.49	1.03	noncode	973	50	984	166	21	1	973	1795	827	0	730
MSTRG.41646.3	NONSCET000293.2	80.49	1.03	noncode	973	50	984	166	21	1	973	1795	827	0	730
MSTRG.33125.1	NONGGAT001188.2	94.78	0.99	noncode	349	50	345	17	1	1	344	4	348	1e-150	536
MSTRG.33125.1	NONGGAT001188.2	94.78	0.99	noncode	349	50	345	17	1	1	344	4	348	1e-150	536
MSTRG.33125.1	NONGGAT012480.1	89.6	1	noncode	349	50	346	29	3	1	344	1338	998	2e-119	433
MSTRG.33125.1	NONGGAT012480.1	89.6	1	noncode	349	50	346	29	3	1	344	1338	998	2e-119	433
MSTRG.23317.1	NONGGAT001548.2	100	1	noncode	348	50	348	0	0	1	348	25	372	0	643
MSTRG.23317.1	NONGGAT001548.2	100	1	noncode	348	50	348	0	0	1	348	25	372	0	643
MSTRG.39253.3	NONGGAT003199.2	82.1	0.87	noncode	460	50	391	59	10	75	460	516	900	1e-86	324
MSTRG.39253.3	NONGGAT003199.2	82.1	0.87	noncode	460	50	391	59	10	75	460	516	900	1e-86	324
MSTRG.44026.2	NONGGAT003263.2	100	0.94	noncode	2055	50	1929	0	0	1	1929	3706	1778	0	3563
MSTRG.44026.2	NONGGAT003262.2	100	0.94	noncode	2055	50	1929	0	0	1	1929	3706	1778	0	3563
MSTRG.44026.2	NONGGAT003263.2	100	0.94	noncode	2055	50	1929	0	0	1	1929	3706	1778	0	3563
MSTRG.44026.2	NONGGAT003262.2	100	0.94	noncode	2055	50	1929	0	0	1	1929	3706	1778	0	3563
MSTRG.19.2	NONGGAT010304.2	100	0.83	noncode	2113	50	1746	0	0	368	2113	255	2000	0	3225
MSTRG.19.2	NONGGAT010304.2	100	0.83	noncode	2113	50	1746	0	0	368	2113	255	2000	0	3225
MSTRG.18800.1	NONGGAT012413.1	91.7	1	noncode	241	50	241	17	1	1	241	2315	2552	4e-89	331
MSTRG.18800.1	NONGGAT012413.1	91.7	1	noncode	241	50	241	17	1	1	241	2315	2552	4e-89	331
MSTRG.18800.1	NONGGAT013012.1	91.91	0.98	noncode	241	50	235	16	1	5	239	2934	2703	2e-87	326
MSTRG.18800.1	NONGGAT013012.1	91.91	0.98	noncode	241	50	235	16	1	5	239	2934	2703	2e-87	326
MSTRG.18800.1	NONGGAT016647.1	92.89	0.94	noncode	241	50	225	13	1	17	241	570	791	7e-87	324
MSTRG.18800.1	NONGGAT001769.2	92.24	0.97	noncode	241	50	232	13	3	10	241	1169	943	7e-87	324
MSTRG.18800.1	NONGGAT016647.1	92.89	0.94	noncode	241	50	225	13	1	17	241	570	791	7e-87	324
MSTRG.18800.1	NONGGAT001769.2	92.24	0.97	noncode	241	50	232	13	3	10	241	1169	943	7e-87	324
MSTRG.18800.1	NONGGAT014129.1	96.41	0.81	noncode	241	50	195	7	0	10	204	198	4	2e-86	322
MSTRG.18800.1	NONGGAT012967.1	91.53	0.98	noncode	241	50	236	17	1	1	236	273	41	2e-86	322
MSTRG.18800.1	NONGGAT014129.1	96.41	0.81	noncode	241	50	195	7	0	10	204	198	4	2e-86	322
MSTRG.18800.1	NONGGAT012967.1	91.53	0.98	noncode	241	50	236	17	1	1	236	273	41	2e-86	322
MSTRG.18800.1	NONGGAT014020.1	90.34	1	noncode	241	50	238	18	3	2	239	1914	2146	7e-82	307
MSTRG.18800.1	NONGGAT014020.1	90.34	1	noncode	241	50	238	18	3	2	239	1914	2146	7e-82	307
MSTRG.18800.1	NONGGAT013979.1	89.63	1.01	noncode	241	50	241	21	3	1	241	1865	1629	9e-81	303
MSTRG.18800.1	NONGGAT012594.1	90.04	1.03	noncode	241	50	241	15	7	3	241	725	958	9e-81	303
MSTRG.18800.1	NONGGAT013979.1	89.63	1.01	noncode	241	50	241	21	3	1	241	1865	1629	9e-81	303
MSTRG.18800.1	NONGGAT012594.1	90.04	1.03	noncode	241	50	241	15	7	3	241	725	958	9e-81	303
MSTRG.18800.1	NONGGAT014535.1	90.52	0.97	noncode	241	50	232	17	3	10	241	1543	1317	3e-80	302
MSTRG.18800.1	NONGGAT001309.2	89.92	1	noncode	241	50	238	19	4	4	241	3172	3404	3e-80	302
MSTRG.18800.1	NONGGAT014535.1	90.52	0.97	noncode	241	50	232	17	3	10	241	1543	1317	3e-80	302
MSTRG.18800.1	NONGGAT001309.2	89.92	1	noncode	241	50	238	19	4	4	241	3172	3404	3e-80	302
MSTRG.18800.1	NONGGAT014911.1	93.5	0.83	noncode	241	50	200	13	0	5	204	1965	2164	4e-79	298
MSTRG.18800.1	NONGGAT013049.1	93.5	0.83	noncode	241	50	200	13	0	1	200	1124	1323	4e-79	298
MSTRG.18800.1	NONGGAT014911.1	93.5	0.83	noncode	241	50	200	13	0	5	204	1965	2164	4e-79	298
MSTRG.18800.1	NONGGAT013049.1	93.5	0.83	noncode	241	50	200	13	0	1	200	1124	1323	4e-79	298
MSTRG.18800.1	NONGGAT016648.1	93.37	0.82	noncode	241	50	196	10	1	46	241	319	511	9e-76	287
MSTRG.18800.1	NONGGAT016648.1	93.37	0.82	noncode	241	50	196	10	1	46	241	319	511	9e-76	287
MSTRG.18800.1	NONGGAT016668.1	88.99	0.95	noncode	241	50	227	22	1	10	236	99	322	5e-73	278
MSTRG.18800.1	NONGGAT009068.2	88.24	1	noncode	241	50	238	21	4	5	241	437	668	5e-73	278
MSTRG.18800.1	NONGGAT003141.2	92	0.84	noncode	241	50	200	12	4	5	203	277	81	5e-73	278
MSTRG.18800.1	NONGGAT003140.2	92	0.84	noncode	241	50	200	12	4	5	203	277	81	5e-73	278
MSTRG.18800.1	NONGGAT003139.2	92	0.84	noncode	241	50	200	12	4	5	203	277	81	5e-73	278
MSTRG.18800.1	NONGGAT016668.1	88.99	0.95	noncode	241	50	227	22	1	10	236	99	322	5e-73	278
MSTRG.18800.1	NONGGAT009068.2	88.24	1	noncode	241	50	238	21	4	5	241	437	668	5e-73	278
MSTRG.18800.1	NONGGAT003141.2	92	0.84	noncode	241	50	200	12	4	5	203	277	81	5e-73	278
MSTRG.18800.1	NONGGAT003140.2	92	0.84	noncode	241	50	200	12	4	5	203	277	81	5e-73	278
MSTRG.18800.1	NONGGAT003139.2	92	0.84	noncode	241	50	200	12	4	5	203	277	81	5e-73	278
MSTRG.18800.1	NONGGAT012006.2	87.55	1.01	noncode	241	50	241	27	2	1	241	1350	1113	2e-72	276
MSTRG.18800.1	NONGGAT012006.2	87.55	1.01	noncode	241	50	241	27	2	1	241	4973	4736	2e-72	276
MSTRG.18800.1	NONGGAT012006.2	87.55	1.01	noncode	241	50	241	27	2	1	241	8727	8490	2e-72	276
MSTRG.18800.1	NONGGAT002514.2	89.24	0.93	noncode	241	50	223	20	2	19	241	402	184	2e-72	276
MSTRG.18800.1	NONGGAT012006.2	87.55	1.01	noncode	241	50	241	27	2	1	241	1350	1113	2e-72	276
MSTRG.18800.1	NONGGAT012006.2	87.55	1.01	noncode	241	50	241	27	2	1	241	4973	4736	2e-72	276
MSTRG.18800.1	NONGGAT012006.2	87.55	1.01	noncode	241	50	241	27	2	1	241	8727	8490	2e-72	276
MSTRG.18800.1	NONGGAT002514.2	89.24	0.93	noncode	241	50	223	20	2	19	241	402	184	2e-72	276
MSTRG.18800.1	NONGGAT012962.1	87.29	0.99	noncode	241	50	236	27	2	5	240	3482	3714	1e-69	267
MSTRG.18800.1	NONGGAT012962.1	87.29	0.99	noncode	241	50	236	27	2	5	240	3482	3714	1e-69	267
MSTRG.18800.1	NONGGAT014506.1	87.39	0.97	noncode	241	50	230	23	3	12	241	1038	1261	2e-67	259
MSTRG.18800.1	NONGGAT014506.1	87.39	0.97	noncode	241	50	230	23	3	12	241	1038	1261	2e-67	259
MSTRG.41715.54	NONGGAT003016.2	95.98	0.94	noncode	716	50	671	22	2	1	671	666	1	0	1085
MSTRG.41715.54	NONGGAT003016.2	95.98	0.94	noncode	716	50	671	22	2	1	671	666	1	0	1085
MSTRG.123559.1	NONGGAT012480.1	88.07	1	noncode	244	50	243	28	1	1	243	1373	1614	9e-76	287
MSTRG.123559.1	NONGGAT012480.1	88.07	1	noncode	244	50	243	28	1	1	243	1373	1614	9e-76	287
MSTRG.60336.1	NONGGAT004277.2	100	0.84	noncode	278	50	234	0	0	45	278	22	255	1e-119	433
MSTRG.60336.1	NONGGAT004277.2	100	0.84	noncode	278	50	234	0	0	45	278	22	255	1e-119	433
MSTRG.39962.1	NONGGAT002787.2	89.86	0.96	noncode	229	50	217	1	3	1	196	909	693	2e-67	259
MSTRG.39962.1	NONGGAT002787.2	89.86	0.96	noncode	229	50	217	1	3	1	196	909	693	2e-67	259
MSTRG.137659.1	NONGGAT008944.2	100	0.98	noncode	228	50	223	0	0	6	228	1	223	1e-113	412
MSTRG.137659.1	NONGGAT008944.2	100	0.98	noncode	228	50	223	0	0	6	228	1	223	1e-113	412
MSTRG.145379.1	NONGGAT011669.2	100	0.88	noncode	233	50	204	0	0	30	233	1108	1311	5e-103	377
MSTRG.145379.1	NONGGAT011668.2	100	0.88	noncode	233	50	204	0	0	30	233	1113	1316	5e-103	377
MSTRG.145379.1	NONGGAT011669.2	100	0.88	noncode	233	50	204	0	0	30	233	1108	1311	5e-103	377
MSTRG.145379.1	NONGGAT011668.2	100	0.88	noncode	233	50	204	0	0	30	233	1113	1316	5e-103	377
MSTRG.66572.1	NONGGAT011462.2	84.52	0.89	noncode	275	50	239	27	7	1	232	812	1047	6e-58	228
MSTRG.66572.1	NONGGAT011462.2	81.44	1.09	noncode	275	50	291	37	9	1	275	289	578	3e-56	222
MSTRG.66572.1	NONGGAT011462.2	81.5	0.98	noncode	275	50	254	25	17	1	248	652	889	3e-46	189
MSTRG.66572.1	NONGGAT011462.2	80.18	0.83	noncode	275	50	222	28	7	55	275	943	1149	4e-35	152
MSTRG.66572.1	NONGGAT011462.2	84.52	0.89	noncode	275	50	239	27	7	1	232	812	1047	6e-58	228
MSTRG.66572.1	NONGGAT011462.2	81.44	1.09	noncode	275	50	291	37	9	1	275	289	578	3e-56	222
MSTRG.66572.1	NONGGAT011462.2	81.5	0.98	noncode	275	50	254	25	17	1	248	652	889	3e-46	189
MSTRG.66572.1	NONGGAT011462.2	80.18	0.83	noncode	275	50	222	28	7	55	275	943	1149	4e-35	152
MSTRG.2479.1	NONGGAT013042.1	93.39	0.92	noncode	264	50	242	16	0	3	244	86	327	2e-97	359
MSTRG.2479.1	NONGGAT012527.1	93.39	0.92	noncode	264	50	242	16	0	3	244	587	346	2e-97	359
MSTRG.2479.1	NONGGAT013042.1	93.39	0.92	noncode	264	50	242	16	0	3	244	86	327	2e-97	359
MSTRG.2479.1	NONGGAT012527.1	93.39	0.92	noncode	264	50	242	16	0	3	244	587	346	2e-97	359
MSTRG.2479.1	NONGGAT000259.2	91.02	0.97	noncode	264	50	256	22	1	7	262	306	52	6e-93	344
MSTRG.2479.1	NONGGAT000259.2	91.02	0.97	noncode	264	50	256	22	1	7	262	306	52	6e-93	344
MSTRG.2479.1	NONGGAT012481.1	90.04	0.95	noncode	264	50	251	24	1	13	262	666	916	7e-87	324
MSTRG.2479.1	NONGGAT012480.1	90.04	0.95	noncode	264	50	251	24	1	13	262	746	996	7e-87	324
MSTRG.2479.1	NONGGAT012481.1	90.04	0.95	noncode	264	50	251	24	1	13	262	666	916	7e-87	324
MSTRG.2479.1	NONGGAT012480.1	90.04	0.95	noncode	264	50	251	24	1	13	262	746	996	7e-87	324
MSTRG.116736.1	NONGGAT007513.2	100	0.88	noncode	208	50	182	0	0	27	208	975	794	7e-91	337
MSTRG.116736.1	NONGGAT007513.2	100	0.88	noncode	208	50	182	0	0	27	208	975	794	7e-91	337
MSTRG.8242.1	NONGGAT016647.1	83.15	0.99	noncode	276	50	273	46	0	4	276	1093	821	1e-64	250
MSTRG.8242.1	NONGGAT016647.1	83.15	0.99	noncode	276	50	273	46	0	4	276	1093	821	1e-64	250
MSTRG.8242.1	NONGGAT012962.1	82.55	1	noncode	276	50	275	48	0	2	276	4019	3745	2e-62	243
MSTRG.8242.1	NONGGAT012962.1	82.55	1	noncode	276	50	275	48	0	2	276	4019	3745	2e-62	243
MSTRG.66896.1	NONGGAT014020.1	93.82	0.94	noncode	294	50	275	16	1	1	275	2194	1921	2e-113	412
MSTRG.66896.1	NONGGAT014020.1	93.82	0.94	noncode	294	50	275	16	1	1	275	2194	1921	2e-113	412
MSTRG.66896.1	NONGGAT014535.1	93.8	0.94	noncode	294	50	274	16	1	1	274	1271	1543	6e-113	411
MSTRG.66896.1	NONGGAT014535.1	93.8	0.94	noncode	294	50	274	16	1	1	274	1271	1543	6e-113	411
MSTRG.66896.1	NONGGAT016647.1	92.16	0.92	noncode	294	50	268	18	3	2	267	836	570	2e-102	375
MSTRG.66896.1	NONGGAT016647.1	92.16	0.92	noncode	294	50	268	18	3	2	267	836	570	2e-102	375
MSTRG.66896.1	NONGGAT001309.2	92.02	0.9	noncode	294	50	263	20	1	7	268	3444	3182	4e-100	368
MSTRG.66896.1	NONGGAT001309.2	92.02	0.9	noncode	294	50	263	20	1	7	268	3444	3182	4e-100	368
MSTRG.66896.1	NONGGAT013012.1	91.04	0.91	noncode	294	50	268	23	1	9	275	2663	2930	6e-98	361
MSTRG.66896.1	NONGGAT013012.1	91.04	0.91	noncode	294	50	268	23	1	9	275	2663	2930	6e-98	361
MSTRG.66896.1	NONGGAT016648.1	93.31	0.82	noncode	294	50	239	13	3	2	238	556	319	1e-94	350
MSTRG.66896.1	NONGGAT016648.1	93.31	0.82	noncode	294	50	239	13	3	2	238	556	319	1e-94	350
MSTRG.66896.1	NONGGAT012594.1	90.87	0.91	noncode	294	50	263	19	4	9	268	996	736	5e-94	348
MSTRG.66896.1	NONGGAT012594.1	90.87	0.91	noncode	294	50	263	19	4	9	268	996	736	5e-94	348
MSTRG.66896.1	NONGGAT014506.1	89.42	0.94	noncode	294	50	274	27	1	7	280	1301	1030	6e-93	344
MSTRG.66896.1	NONGGAT014506.1	89.42	0.94	noncode	294	50	274	27	1	7	280	1301	1030	6e-93	344
MSTRG.66896.1	NONGGAT002514.2	89.85	0.91	noncode	294	50	266	25	2	1	265	138	402	8e-92	340
MSTRG.66896.1	NONGGAT002514.2	89.85	0.91	noncode	294	50	266	25	2	1	265	138	402	8e-92	340
MSTRG.66896.1	NONGGAT013979.1	88.77	0.95	noncode	294	50	276	27	4	2	275	1584	1857	4e-90	335
MSTRG.66896.1	NONGGAT013979.1	88.77	0.95	noncode	294	50	276	27	4	2	275	1584	1857	4e-90	335
MSTRG.66896.1	NONGGAT001769.2	91.74	0.83	noncode	294	50	242	17	2	35	275	931	1170	1e-89	333
MSTRG.66896.1	NONGGAT001769.2	91.74	0.83	noncode	294	50	242	17	2	35	275	931	1170	1e-89	333
MSTRG.66896.1	NONGGAT009068.2	89.71	0.84	noncode	294	50	243	20	3	35	275	680	441	3e-81	305
MSTRG.66896.1	NONGGAT009068.2	89.71	0.84	noncode	294	50	243	20	3	35	275	680	441	3e-81	305
MSTRG.19182.1	NONGGAT001203.2	100	0.97	noncode	223	50	217	0	0	7	223	1	217	3e-110	401
MSTRG.19182.1	NONGGAT001203.2	100	0.97	noncode	223	50	217	0	0	7	223	1	217	3e-110	401
MSTRG.10874.1	NONGGAT000696.2	100	0.83	noncode	1147	50	955	0	0	23	977	671	1625	0	1764
MSTRG.10874.1	NONGGAT000696.2	100	0.83	noncode	1147	50	955	0	0	23	977	671	1625	0	1764
MSTRG.132672.1	NONGGAT008562.2	100	0.86	noncode	308	50	266	0	0	25	290	886	1151	2e-137	492
MSTRG.132672.1	NONGGAT008562.2	100	0.86	noncode	308	50	266	0	0	25	290	886	1151	2e-137	492
MSTRG.151401.2	NONGGAT011962.2	100	0.9	noncode	305	50	273	0	0	33	305	131	403	3e-141	505
MSTRG.151401.2	NONGGAT011962.2	100	0.9	noncode	305	50	273	0	0	33	305	131	403	3e-141	505
MSTRG.151401.2	NONGGAT011960.2	100	0.86	noncode	305	50	261	0	0	34	294	219	479	1e-134	483
MSTRG.151401.2	NONGGAT011960.2	100	0.86	noncode	305	50	261	0	0	34	294	219	479	1e-134	483
MSTRG.47131.1	NONGGAT005793.2	85.48	0.83	noncode	367	50	303	41	3	58	358	3180	3481	2e-83	313
MSTRG.47131.1	NONGGAT005793.2	85.48	0.83	noncode	367	50	303	41	3	58	358	3180	3481	2e-83	313
MSTRG.22526.1	NONGGAT010087.2	99.16	1	noncode	238	50	238	2	0	1	238	256	19	1e-118	429
MSTRG.22526.1	NONGGAT010087.2	99.16	1	noncode	238	50	238	2	0	1	238	256	19	1e-118	429
MSTRG.20690.1	NONGGAT016083.1	88.34	1	noncode	224	50	223	24	2	1	222	372	151	1e-69	267
MSTRG.20690.1	NONGGAT016083.1	88.34	1	noncode	224	50	223	24	2	1	222	372	151	1e-69	267
MSTRG.149873.1	NONGGAT011884.2	100	1	noncode	1454	50	1451	0	0	1	1451	17	1467	0	2680
MSTRG.149873.1	NONGGAT011884.2	100	1	noncode	1454	50	1451	0	0	1	1451	17	1467	0	2680
MSTRG.22530.1	NONGGAT014020.1	95.74	0.99	noncode	238	50	235	10	0	1	235	1948	2182	1e-103	379
MSTRG.22530.1	NONGGAT014020.1	95.74	0.99	noncode	238	50	235	10	0	1	235	1948	2182	1e-103	379
MSTRG.22530.1	NONGGAT014535.1	94.49	1	noncode	238	50	236	11	2	1	235	1517	1283	1e-98	363
MSTRG.22530.1	NONGGAT014535.1	94.49	1	noncode	238	50	236	11	2	1	235	1517	1283	1e-98	363
MSTRG.22530.1	NONGGAT016647.1	91.06	1	noncode	238	50	235	19	2	6	238	594	828	1e-84	316
MSTRG.22530.1	NONGGAT016647.1	91.06	1	noncode	238	50	235	19	2	6	238	594	828	1e-84	316
MSTRG.22530.1	NONGGAT016648.1	91.63	0.96	noncode	238	50	227	17	2	14	238	322	548	1e-83	313
MSTRG.22530.1	NONGGAT016648.1	91.63	0.96	noncode	238	50	227	17	2	14	238	322	548	1e-83	313
MSTRG.22530.1	NONGGAT001309.2	92.96	0.9	noncode	238	50	213	14	1	27	238	3229	3441	2e-82	309
MSTRG.22530.1	NONGGAT001309.2	92.96	0.9	noncode	238	50	213	14	1	27	238	3229	3441	2e-82	309
MSTRG.22530.1	NONGGAT012594.1	91.19	0.96	noncode	238	50	227	18	2	14	238	769	995	7e-82	307
MSTRG.22530.1	NONGGAT012594.1	91.19	0.96	noncode	238	50	227	18	2	14	238	769	995	7e-82	307
MSTRG.22530.1	NONGGAT014506.1	92.42	0.89	noncode	238	50	211	14	1	28	238	1090	1298	1e-79	300
MSTRG.22530.1	NONGGAT014506.1	92.42	0.89	noncode	238	50	211	14	1	28	238	1090	1298	1e-79	300
MSTRG.22530.1	NONGGAT002514.2	89.12	1.01	noncode	238	50	239	25	1	1	238	385	147	1e-78	296
MSTRG.22530.1	NONGGAT002514.2	89.12	1.01	noncode	238	50	239	25	1	1	238	385	147	1e-78	296
MSTRG.22530.1	NONGGAT001769.2	91.12	0.91	noncode	238	50	214	17	2	1	213	1143	931	2e-76	289
MSTRG.22530.1	NONGGAT001769.2	91.12	0.91	noncode	238	50	214	17	2	1	213	1143	931	2e-76	289
MSTRG.22530.1	NONGGAT013012.1	88.33	1.02	noncode	238	50	240	26	2	1	238	2903	2664	9e-76	287
MSTRG.22530.1	NONGGAT013012.1	88.33	1.02	noncode	238	50	240	26	2	1	238	2903	2664	9e-76	287
MSTRG.22530.1	NONGGAT012413.1	87.08	1.02	noncode	238	50	240	29	2	1	238	2350	2589	9e-71	270
MSTRG.22530.1	NONGGAT012413.1	87.08	1.02	noncode	238	50	240	29	2	1	238	2350	2589	9e-71	270
MSTRG.22530.1	NONGGAT009068.2	89.3	0.91	noncode	238	50	215	19	2	1	213	468	680	1e-69	267
MSTRG.22530.1	NONGGAT009068.2	89.3	0.91	noncode	238	50	215	19	2	1	213	468	680	1e-69	267
MSTRG.22530.1	NONGGAT012962.1	85.83	1.02	noncode	238	50	240	32	2	1	238	3513	3752	9e-66	254
MSTRG.22530.1	NONGGAT012962.1	85.83	1.02	noncode	238	50	240	32	2	1	238	3513	3752	9e-66	254
[truncated: 1,196 more rows]

## Sheet: Known miRNAs
Table S3b. 471 know miRNAs.
miRNA	score_total	mature_sequence	star_sequence	GenomeID	strand	start	end	pre_seq	hairpin_stru	hairpin_energy	CH1	CH2	CH3	TC1	TC2	TC3
gga-miR-199-3p	--	TACAGTAGTCTGCACATTGG	--	8	+	5020623	5020730	GAAGCGUCCGGAGAUCCUGCUCCGUCGCCCCAGUGUUCAGACUACCUGUUCAGGACAAUGCUGUUGUACAGUAGUCUGCACAUUGGUUAGACUGGGCAAGGGAAAGCA	--	--	7478.88	7642.92	7831.14	7762.86	7210.53	7320.53
gga-miR-6604-5p	--	TGGCACGGTGCTAGGGATTTCTGT	--	6	+	23317903	23318012	GGGCACCCUGUCCUGGAGGCUGGCACGGUGCUAGGGAUUUCUGUGCCAGCAUCUUGCACUGACUCCCUUGUCCUGUGCCCCAGGAGUGGAAGAGGAGGUGGCAGAUGUGC	--	--	1.92082	1.50353	1.33581	2.13415	2.06335	2.28289
gga-miR-1602	--	TGGGCTCTGCATCACCCCATGG	--	4	+	76253965	76254055	GGAGCAGGAGGAGAUGCCCUGGGGGUGCUGCGAAGCCUGCAGCCGCCCAGGGGCUGAGCUGGGCUCUGCAUCACCCCAUGGGCACUGCUCC	--	--	0.187397	0.436508	0.311689	0.615621	0.746318	0.702428
gga-miR-6561-5p	--	TCTTTCCAGGCAGGAGCTCCCT	--	8	+	11640957	11641061	UUGUGGCCCUCUGCUGGACUCUUUCCAGGCAGGAGCUCCCUGCCUUUUUUUUGCAUCAGGGAGCCCAGAACUGGAAACAGUAGCCCAGGUGAGGCCUGACCAAUA	--	--	0	0	0	0	0	0.0439018
gga-miR-133c-5p	--	GCTGGTAAAAAGGAACCAGATC	--	23	+	4489878	4489956	UGCCUUCCUGGGGCUGGUAAAAAGGAACCAGAUCAACUACAACUGGAUUUGGUCCCCUUCAACCAGCUGCAGUGGGGCA	--	--	0	0	0.044527	0	0	0
gga-miR-3529	--	AGGCAGACTGTGACTTGTTGT	--	10	+	13575944	13576034	GGCCGUGCGCCCUAAGGCAGACUGUGACUUGUUGUGGUGGGAUGAGCCAUACAACAACAAAAUCACUAGUCUUCCAGAGGGCACCGCGGCC	--	--	13.68	7.51764	11.7551	7.10017	9.92165	11.7218
gga-miR-6698-3p	--	TTAGGAGAGAGTGAGAAGTAAGT	--	2	+	67788808	67788917	AACGGAAGCGAACAAUUCCACAUUCUUCUCAGUAUCUUCCUCUGACCUGGUCUCAAAGUGGUUAGGAGAGAGUGAGAAGUAAGUUGGAGUUGCCAGAGUUCCAGGAAAAU	--	--	0.187397	0.291006	0.133581	0.164166	0.0878022	0.351214
gga-miR-1457	--	CACTACAGGCTGCAAAAGGGTT	--	2	+	101903807	101903849	GCAUCCACAACCUCCUUGGGCAACCUGUUCCAGUGCGUCACCUUUAAAUUAGAUUAUCACACUACAGGCUGCAAAAGGGUUUGUGAG	--	--	0.0936986	0	0.044527	0.164166	0.263407	0.0439018
gga-miR-6583-5p	--	AGAGGAGCTGGGAGGATG	--	3	+	781134	781243	ACCUGGGAAGGUGACAAGCAGAGGAGCUGGGAGGAUGCAGCGGGAGGUAUCUCGCUUAAUUGCACCUGACAUUUCUCUUUCAUUUCCCAGUGUGUAAUGCAUUUCUUAAU	--	--	0	0	0.044527	0.205207	0	0.0439018
gga-miR-7438-5p	--	TTTTTCAAGGGGACAACTCAGA	--	Z	+	70979936	70980000	UUUUUCAAGGGGACAACUCAGAGCAGGACGCUACUUUGGUAUUUGAGUUGUCUUCCUGAAUAGUU	--	--	0.609041	1.06702	0.89054	1.1902	0.878022	2.01948
gga-miR-30c-5p	--	TGTAAACATCCTACACTCTCAGCT	--	3	+	82370044	82370115	AGGUACUGUAAACAUCCUACACUCUCAGCUGUGGAAACUAAGAAAGCUGGGAGAAGGCUGUUUACUCUCCCU	--	--	3301.05	3305.1	3568.66	3369.38	3073.03	3502.44
gga-miR-12247-3p	--	CCCAGCACGCCTACCCCGGGCC	--	22	+	5203946	5204005	CCCGGGGUGGGCACGCUGUACGGCACGCAGCGGCUGCCCCAGCACGCCUACCCCGGGCCC	--	--	0.0468493	0.0970019	0.178108	0.0820828	0.219505	0
gga-miR-1604	--	TGGGCCCAGGGCTGTGCTGGAGA	--	1	+	596813	596909	UCUGUCCCACUGCAGGCUGUGGGCCCAGGGCUGUGCUGGAGACAUCCCAGUGCCCAGCCAGCCAUGGUCCUGCAGCCUGGGGCCCUCUUGGUCCAGA	--	--	3.09206	4.26808	3.74027	3.20123	2.76577	2.80971
gga-miR-128-1-5p	--	CGGGGCCGTAACACTGTCTGAGA	--	7	+	30614322	30614403	UGAGCUGUUGAAUUCGGGGCCGUAACACUGUCUGAGAGGUUUAUAUUUCUCACAGUGAACCGGUCUCUUUUUCAGCUGCUUC	--	--	23.3778	29.2461	31.5251	23.804	26.8236	23.5313
gga-miR-1730-3p	--	AAGGCCATGGCTGTTTGCTGCT	--	4	+	48210684	48210776	CAGAGCUGUUUGCAGGCACACAGCUAACAGAGGUGGAACCUUGGGGAGAAAAGUGCUGCAAGGCCAUGGCUGUUUGCUGCUGGUAAAGCUCUG	--	--	0.0468493	0.0485009	0.089054	0.0410414	0.131703	0.0878035
gga-miR-302c-5p	--	TTTAACATGGAGGTACCTGCTG	--	4	+	57084441	57084505	CCUCCGCUUUAACAUGGAGGUACCUGCUGCCUACAAAAGUAAGUGCUUCCAUGUUUCAGUGGUGG	--	--	0.140548	0.194004	0.222635	0	1.14143	0.131705
gga-miR-7478-5p	--	TACCTGTGTGACTGTGGAGAGGA	--	10	+	751741	751818	UACCUGUGUGACUGUGGAGAGGAUAUGAGAAAGUGGGAUGGAAAACCCACCUCAGUCCUACAUGCACGGGCAGGUGAG	--	--	0	0	0	0.0410414	0.0439011	0
gga-miR-6542-3p	--	ACGGGACAGTGCTGAAGACTA	--	3	+	4424282	4424408	AGCGGCCCCUCGUUCCCCAUCACGAAUUACCUGGCGCCAGUGUCUGCCAGCAUCAGCCCCAGUGCCGUCACCAGUGCCAACGGGACAGUGCUGAAGACUACUGGAGCCAGUGCAGUGACAUCCGGGG	--	--	24.3148	18.5274	24.8015	26.1023	24.3212	27.0874
gga-miR-6578-3p	--	GGGCACTCTGCTGACCGCTTGGC	--	3	+	104945207	104945308	UGUCUUGCUUUGUAGCUACCAGCUGUGGCAGAGUUCUCCACCAGUGAGACUAUGGGGCACUCUGCUGACCGCUUGGCUGCUGCUUUUGCGAUCUCCCGUGUG	--	--	0	0	0	0	0.0878022	0
gga-miR-1687-5p	--	TGAGGAAATGAGCCAGCTGAG	--	20	+	13077816	13077906	GAUUUCUUUGUGUCUGUGGUCUGAGGAAAUGAGCCAGCUGAGUUAGCAACUUCUUUGCUGGCUGUUUCUCAGUGACUGCAGCAUAAAAAUC	--	--	0	0.0970019	0.089054	0.205207	0.0878022	0.0878035
gga-miR-29b-1-5p	--	AGCTGGTTTCATATGGTGGTTTAGA	--	1	+	4029386	4029466	CCUCAGGAAGCUGGUUUCAUAUGGUGGUUUAGAUUUAACUAUUCAUUGUCUAGCACCAUUUGAAAUCAGUGUUCUUGGAGG	--	--	0.187397	0.145503	0.133581	0.492497	0.219505	0.263411
gga-miR-12252-3p	--	GTGAGGCTGTGCTCCCCCCGA	--	26	+	1197938	1197992	AUCAUCGUGGGGGUCGGCCAGGCUGAGUUUGACGGUGAGGCUGUGCUCCCCCCGA	--	--	1.73342	1.50353	1.24676	1.88791	1.66824	1.62437
gga-miR-6609-3p	--	ACAGCCCCTGTGCTCTGACCGCA	--	1	+	80718109	80718218	ACAGAAUCUGCAUCGUUGUUGCCAGAGCCAGGUGCCUGGUGCCUCCUCACCGAGGCUGAUCACAGCCCCUGUGCUCUGACCGCAUUGCUGCAGAGCCAACCUGCUGCCUU	--	--	0.421644	0.291006	0.400743	0.57458	0.746318	0.702428
gga-miR-1631	--	AAACTGGCGACGTGGGACGGTC	--	Z	+	16452614	16452687	GCUCUGGAUUAGCGAAACUGGCGACGUGGGACGGUCACCGACCCGGCCCCGCGCCCUGCCUCGCCCUCCGGGGU	--	--	0	0.0485009	0	0	0	0
gga-miR-1329-5p	--	TACAGTGATCACGTTACGATGG	--	3	+	96917352	96917446	UCUUGGUCUGGUUGUAGAGAUACAGUGAUCACGUUACGAUGGAUUUCUCAAGUAACAACCUCGUAGCUUGAUCACGAUAUCCCUAUGACUUGAGA	--	--	85.0784	122.901	103.57	109.252	108.831	117.481
gga-miR-1789	--	TGGGTGTACTTGCGGATGAATG	--	11	+	8876883	8876945	CCAUGCACCCACAAGCACAACCAAGCCCAAAUGAAAGGUUUGGGUGUACUUGCGGAUGAAUGG	--	--	0.0468493	0.0970019	0	0.0410414	0	0.0878035
gga-miR-12295-5p	--	ACGGGACGGGGCGGGACGGCGCT	--	Z	+	34597613	34597671	AACGGGACGGGGCGGGACGGCGCUCCUGCUGCCCUGCGCUGCCCGCCCCAUCCCGACCC	--	--	0.140548	0.291006	0.133581	0.0820828	0.307308	0.175607
gga-miR-6631-5p	--	GAAGAGAATGCTGTGGTTCTGC	--	3	+	12627078	12627187	GAAAAUUGAAGAGCUGGUGGGAAGAGAAUGCUGUGGUUCUGCUGAGGACCUGUGGGCCCCACAGCUCUCUCUCCUCUUUAGCUUUCUGCAUCUCAGUAUGUUUGUUACUC	--	--	2.34247	2.32804	3.20594	0.984994	0.526813	2.4585
gga-miR-187-5p	--	GGCTACAACACAGGACATGGGA	--	2	+	83611938	83612023	AAACUAUUGUGAGACCUCCGGCUACAACACAGGACAUGGGAGCUUUUCUGAACCCUCGUGUCUUGUGUUGCAGCCAGAGGGGCACA	--	--	0.796438	1.60053	3.91837	1.43645	1.49264	1.09754
gga-miR-6685-5p	--	CAGCAATGCACGTGTACTCAG	--	5	+	25254927	25255026	CAUCAGCGCUGUACCCGAGCCAGCAAUGCACGUGUACUCAGAGACGGAAUUCCUGGUGACGCGGGCAUUGCUGCUUGGUUCAGGUCAUUGCACACACACA	--	--	0.0936986	0	0.133581	0.0820828	0.219505	0.131705
gga-miR-1800	--	ACTACGTGATGCGATCTGATG	--	5	+	45341426	45341501	CCUGCCGUGACUACGUGAUGCGAUCUGAUGGCUCAGAGGCUGAUUGCUGUCCUCUGCAUCCUGCUGGCUGCUCAGG	--	--	0.374795	0.339506	0.311689	0.57458	0.175604	0.351214
gga-miR-12259-3p	--	TCTGCCTCTTTGTCTATCTGC	--	3	+	30385461	30385529	GUGCAGGUAGGCAGGGGGAGCAGGCUGUGUGCUGGUUGCCUACCGUCUGCCUCUUUGUCUAUCUGCAGA	--	--	2.43616	1.16402	1.91466	2.29832	1.66824	1.93168
gga-miR-137-3p	--	TATTGCTTAAGAATACGCGTAG	--	8	+	12923059	12923154	UCUGACUCUCUUCGGUGACGGGUAUUCUUGGGUGGAUAAUACGGAUUACGUUGUUAUUGCUUAAGAAUACGCGUAGUCGAGGAGAGUACCGGCGGC	--	--	0.187397	0.194004	0.311689	0.328331	0.526813	0.702428
gga-miR-10c-3p	--	CAAATTCGTCTCTAGGGGAAT	--	33	+	7660063	7660123	UACCCUGUAGACUCGAAUUUGUGUGAGCGUCUCCGAGUCGCAAAUUCGUCUCUAGGGGAAUA	--	--	26.3293	28.3245	27.206	29.0984	28.5357	29.9849
gga-miR-2984-5p	--	GTGCCTGCTGTGAGTGAAATTG	--	1	+	145954987	145955056	GUGCCUGCUGUGAGUGAAAUUGUCUGAGCUGGUGCCGCACUUUAUCAAUUUCACUCUCAGCAGGCUCCGC	--	--	0	0.0485009	0.133581	0.123124	0.0878022	0.0878035
gga-miR-1397-3p	--	GATGTAACCCAACGCAGCATGA	--	1	+	128273775	128273879	AGCUGUUGACUGAAUGCGAUGUGUGCAUUGCAUUGCGACGGGUUAUAUCACUAAUCGUAACAUGAUGUAACCCAACGCAGCAUGAUGUAAGCGUCGUGAAACGUU	--	--	0	0.0485009	0	0	0	0
gga-miR-1748	--	ACTGAGGTCTGGGTGCAGCTGA	--	18	+	786461	786541	GCAGUGCCCUGCUCGGCUGCACCAGGCAGCCCCAGCAGUCACCCUGGCACUGAGGUCUGGGUGCAGCUGAGUGUGGCCUGC	--	--	0	0	0	0.164166	0.0439011	0.0878035
gga-miR-6582-5p	--	TTAGAGAGACACTCATAGAG	--	3	+	57371166	57371270	UCAGUGUUGUUGCAUCCUGUUAGAGAGACACUCAUAGAGAGUCUUUUCACAGUAACUCACUCUGGGUGUUUCUCUUGCAGAAAACUGAGGUAAUAGAAGAAGCUU	--	--	1.03069	0.970019	0.935067	0.656663	0.307308	0.658527
gga-miR-1596-5p	--	ATTCTCCTTCAATCCATCTTTGT	--	1	+	6347545	6347634	UGGACUUUGUUUCAUUCUCCUUCAAUCCAUCUUUGUCAUGAUUUACAAAAAGAACAAAGGUGGCCGUGGGUGAAUGAAGCCAGGCAUCCA	--	--	0	0.0485009	0	0.0820828	0	0.175607
gga-miR-6570-5p	--	AGGACCCACTGGATCTGCATCTTC	--	1	+	186317303	186317402	AAAACCCUGGUUUGGAUUAAGGACCCACUGGAUCUGCAUCUUCCAAACUUGGGAGAGGAGAGCCUGUGGGCCAGAAAUCCCACCAGCACUGCACCAUGCC	--	--	0.187397	0.0970019	0.044527	0.0820828	0.0878022	0.131705
gga-miR-6552-3p	--	CAACAAGAAGTGGACAGACTG	--	5	+	45384999	45385102	CUCUCUGCCCAACUCUCCAGUCUGUCCAGGUCUUGUUGGAUGGCAGCACAGCCUUUCAACAAGAAGUGGACAGACUGGAGCGUUGCUUCAAGACUGACAAGAAA	--	--	0.0468493	0	0.133581	0.697704	0.131703	1.44876
gga-miR-1680-5p	--	TTCCTCCTGGGTACAACTCTGC	--	10	+	16308512	16308600	GCUGGGCACUGCUUUCCUCCUGGGUACAACUCUGCUGUCUUUGUACUUUCUACUUGCAGGCGGUAUCAGGAGGCUGAGCUGUGCCCAGC	--	--	0.234247	0.53351	0.356216	0.492497	0.307308	0.219509
gga-miR-6614-3p	--	ACAGGACAGCGAGAAGGC	--	4	+	13761996	13762105	CCCCGGCAAACGUGAUUCGUGGCCGCGCACGGCGCGUGUUCUGUUCCAUGGCAUAGGAGCAUCUGCUACAGGACAGCGAGAAGGCGGCUGCGGGUUUCUGUUCUCACACU	--	--	0	0.0485009	0	0	0	0
gga-miR-302c-3p	--	TAAGTGCTTCCATGTTTCAGTGG	--	4	+	57084441	57084505	CCUCCGCUUUAACAUGGAGGUACCUGCUGCCUACAAAAGUAAGUGCUUCCAUGUUUCAGUGGUGG	--	--	1.49918	2.37655	3.4731	2.1752	12.6435	3.95116
gga-miR-302b-5p	--	ACTTTAACATGGAGGTGCTTTCT	--	4	+	57084179	57084250	CCCUUUUACUUUAACAUGGAGGUGCUUUCUGUGAUUUUACAAAAGUAAGUGCUUCCAUGUUUUAGUAGAGGU	--	--	2.10822	2.08554	3.25047	2.91394	29.3259	7.90232
gga-miR-1561	--	GCCGGGTTTGCGGCCGCTTTT	--	18	+	6406849	6406933	CCGCCUCCGGCCGGGUUUGCGGCCGCUUUUUGUUCCCGGCCGCGGGGCUUCGGAGCGGAACGGCCGCCGCGUGCCGUGGGGGUGG	--	--	0.374795	0.242505	0.133581	0.205207	0.0878022	0.175607
gga-miR-1729-3p	--	CTACTCGGTGAGTAAGGATAGC	--	15	+	1058317	1058387	CCUGCAUCCCUUACUCACAUGAGUAGUCGUAUCUAUUUCAGUGGGACUACUCGGUGAGUAAGGAUAGCAGG	--	--	1.26493	2.03704	2.00371	1.31333	2.15115	1.71217
gga-miR-1618-5p	--	TGCATCCTGGCTCCTGGCGTCC	--	8	+	7822231	7822309	CUGCGUGCUGCAUCCUGGCUCCUGGCGUCCUGCACGUGCUAUUGGAGAGCCCGGAGCCAGGCUGCUGUUCUCCAGGCAG	--	--	1.35863	0.679013	0.578851	1.47749	1.00973	1.58046
gga-let-7b	--	TGAGGTAGTAGGTTGTGTGGTT	--	1	+	71199656	71199740	CAGGAUGAGGUAGUAGGUUGUGUGGUUUCAGGGUAGUGAUUUUGCCCCAAUCAGGAGAUAACUAUACAACCUACUGCCUUCCCUG	--	--	1041.84	1078.32	702.413	1146.66	1084.66	1154.7
gga-miR-6652-5p	--	TGGGTGTATGTGGGACAGCTC	--	13	+	9641469	9641578	CUCUCCAUGCCCUGCCUGCUGGGUGUAUGUGGGACAGCUCAGUGCCCCCACAGAGGGGGAGAGCAGCCCCACAACCCCCACUGGGCAGCGUGACCCAGCCACCAGCAACA	--	--	0.0468493	0	0	0.0820828	0.219505	0.0439018
gga-miR-6545-5p	--	GGCAGAAAAGGGCTGCAGCTT	--	2	+	71621944	71622050	AGGUUUCUCUUGUUCAAUUGGCAGAAAAGGGCUGCAGCUUCAUCUGAAGUACUGGAGAGAAGCUGGAGCUGAUUUUCUGGCAAUGACAGCAUGACAGAGCAUCCGGC	--	--	0	0	0.044527	0.205207	0.351209	0.219509
gga-miR-6641-3p	--	CTGCTGGGAGAAAAAAGCTAT	--	1	+	180517109	180517212	AAAAAUGAUUUCCUUACAGACAGCUUUUUUAUUUCCAGUUAAUGUGUUUUAAAUACCUGCUGGGAGAAAAAAGCUAUGUGCAAGGUGACAGAAAACAAGAGGCA	--	--	0.0936986	0.0485009	0	0	0	0.0439018
gga-miR-7469-5p	--	TTTGCAATGCAATTTTACAGTAG	--	4	+	18082789	18082855	UUUGCAAUGCAAUUUUACAGUAGACCUUAGAAGUGAGGACAGUCUUUGUGUGCUUGCAUUGCAAAGG	--	--	0.234247	0.0970019	0	0	0.0439011	0.175607
gga-miR-6606-5p	--	GAGGAGCGGGAGGAGCGGGA	--	AADN05001488.1	+	3100	3209	UCACAGGGAAGAGCAACCCAGCCCGGGAGGAGCGGGAGGAGCGGGAGGAGCGACUCUUUUUGGCCUUUGCUUCCCGGCCGGUGGAGGGCUCCCCAGAGCACGUCGCCUCA	--	--	12.8367	13.2893	15.629	42.4368	40.6963	38.3262
gga-miR-6558-3p	--	AGGCCTTCTTGCGTAGCACTTGA	--	9	+	15313549	15313670	CAGGUGUGGCAUCGCGCUGAAAUACUGUGGACACUGUCGACCAAGUGAAACGUUGAGGUGGCUUGUUGAUCAAAUAGGCCUUCUUGCGUAGCACUUGAAUUGUCAGAAAGUAAGUGACUAUC	--	--	0	0	0.044527	0	0	0
gga-miR-1626-5p	--	TTTCCATGGCAGACTTTCTAGGCT	--	1	+	6229359	6229448	AGUGUGUUGAUGCCAUUUCCAUGGCAGACUUUCUAGGCUGAAGAUUUCUGAAAUCUCUGGAAGUUGCCCUGGACGUGGUAUUCAAUGCCU	--	--	0.327945	0.436508	0.667905	0.246249	0.263407	0.526821
gga-miR-1741	--	ATGGCTCTGGATTACACCTT	--	9	+	7327430	7327502	CUUCCAGGUGCCUGAUCCAGAAUCCAUUAAGUUUAAAAAGUAUCUUUAAUGGCUCUGGAUUACACCUUGGAAG	--	--	0	0.145503	0.044527	0.164166	0.439011	0.131705
gga-miR-6591-3p	--	GCAGCCCGACGGACCGGCT	--	4	+	34748234	34748343	CGCCUCCGUCUGCGCAGCCGCCGGGCCGCCCUGGGCGGGGCCCGCUACGCUCCUCUCAGCGGUAGGGCAGCCCGACGGACCGGCUGCCGCGGGGCGGGACCCUCGCUCGC	--	--	0	0	0	0	0	0.0439018
gga-miR-2984-3p	--	ATTTCACTCTCAGCAGGCTCC	--	1	+	145954987	145955056	GUGCCUGCUGUGAGUGAAAUUGUCUGAGCUGGUGCCGCACUUUAUCAAUUUCACUCUCAGCAGGCUCCGC	--	--	0	0.0970019	0.044527	0.164166	0.307308	0.263411
gga-miR-132c-3p	--	CAGTAAGCAGTCTAGAGCCAAG	--	19	+	5663433	5663498	AGCCAUGACUGUAGACUGUUACUGUCCUGUCCCUACGCAGCAGUAAGCAGUCUAGAGCCAAGGUGC	--	--	0.234247	0.0485009	0.222635	0.164166	0.131703	0.131705
gga-miR-12253-3p	--	CCTCTGCCCCTCTCCTCCCGCA	--	26	+	3216239	3216314	GGCGGGAGCUGAGGGGGGGAGGGGAGGGUGUCUGAGCUCCGUCCUGAUGUGCCCUCUGCCCCUCUCCUCCCGCAGC	--	--	0	0.0485009	0	0.0410414	0.0439011	0.0439018
gga-miR-1618-3p	--	GAGCCCGGAGCCAGGCTGCTGT	--	8	+	7822231	7822309	CUGCGUGCUGCAUCCUGGCUCCUGGCGUCCUGCACGUGCUAUUGGAGAGCCCGGAGCCAGGCUGCUGUUCUCCAGGCAG	--	--	0.374795	0.582011	0.534324	0.123124	0.614615	0.0439018
gga-miR-1642	--	TGAGAGGCTGTCAGTTTGTGGGG	--	10	+	19507819	19507892	UGCAGGCUGAGAGGCUGUCAGUUUGUGGGGGUGAAGUAGUUGGGACUCUGCAGACUGCAGCAUCUUGCACUGCA	--	--	0	0	0.044527	0	0	0
gga-miR-12236-5p	--	ATTGATTCATTCTTTGCTCTTCT	--	19	+	8203860	8203917	AUUGAUUCAUUCUUUGCUCUUCUAAUUAUAAGAGGAAGUGCAAAUUAUGAAUAAUGGA	--	--	0.0468493	0.0970019	0.044527	0	0.0439011	0.0439018
gga-miR-199b	--	CAGTAGTCTGCACATTTGGT	--	3	+	63019465	63019530	UUUUUAGGACUUUGUGUACUACUGACUUCUCUCUCUAUCAGUAGUCUGCACAUUUGGUCCCAAGAG	--	--	4.54438	6.01412	6.2783	6.15621	5.13643	5.0487
gga-miR-1671	--	GTGAGGACTGTTGAGTGGCCAAA	--	15	+	5347054	5347113	GGUGAGGACUGUUGAGUGGCCAAAGCAGGAUUCCUGAGCCUGGCCAUCCAAGUCCUUGCU	--	--	0	0	0	0.0410414	0	0
gga-miR-1707	--	TTTGAGCGGGATCTGTTATCGTG	--	17	+	2193803	2193898	AUGCUCCCUCUGCGAUGCGAGAUGCAGAGCUCGCUGAAAUGCUUGAGUUUGUAAUGGCUUUGAGCGGGAUCUGUUAUCGUGCAUAUUUGGGCUCAU	--	--	1.45233	2.37655	1.29128	1.06708	2.01945	2.32679
gga-miR-1b-5p	--	ACATACTTCTTCATATGCCCATA	--	23	+	4489739	4489802	ACAUACUUCUUCAUAUGCCCAUAUGGAGUCGGCCGGCGUUAUGGAAUGUUAAGAAGUAUGUAUC	--	--	0	0	0.044527	0	0	0
gga-miR-210a-5p	--	AGCCACTGACTAACGCACATTG	--	5	+	16094296	16094382	CAGGAGCAGGUGAGCCACUGACUAACGCACAUUGUGCUCUCGGCGACUCCACUGUGCGUGUGACAGCGGCUAACCUGCUCCUCGGAC	--	--	41.7896	58.7346	85.5363	44.8172	67.915	44.5603
gga-miR-135a-2-3p	--	ATGTAGGGATGGAAGCCATGAA	--	1	+	46333899	46333998	AGAUAAAUUCACUCUAGUGUUUUAUGGCUUUUUAUUCCUAUGUGAUAGUAAUAAAGUCUCAUGUAGGGAUGGAAGCCAUGAAAUACAUUGUGAAAAAUCA	--	--	0.281096	0.242505	0.534324	0.451456	0.307308	0.131705
gga-miR-6549-3p	--	ACAGCTGTAAGCAGAAGGCACCC	--	8	+	24838736	24838848	CUCUUGGAUGGUGGCCUUGAGCCUUCUGUUGUGCAUCUGAGAUUCCAGACAGCUUUUGUCAGAUCACAGCUGUAAGCAGAAGGCACCCAAGGCUGCCUUCCUAUGCACCAGUG	--	--	0.0468493	0.0485009	0.133581	0.164166	0.131703	0.131705
gga-miR-12219-3p	--	GCAACCGCTTCCAGCCCGGCA	--	11	+	1403739	1403798	AGGAGCAGGGGGUGGUCAAGCUGACGGACUUUGGCUUCAGCAACCGCUUCCAGCCCGGCA	--	--	0.0936986	0.0485009	0	0	0	0
gga-miR-6561-3p	--	GGGAGCCCAGAACTGGAAACAG	--	8	+	11640957	11641061	UUGUGGCCCUCUGCUGGACUCUUUCCAGGCAGGAGCUCCCUGCCUUUUUUUUGCAUCAGGGAGCCCAGAACUGGAAACAGUAGCCCAGGUGAGGCCUGACCAAUA	--	--	0.0468493	0.0485009	0	0.0410414	0.0878022	0
gga-miR-181a-3p	--	ACCATCGACCGTTGATTGTACC	--	8	+	2387140	2387243	UGUAGUGGUUGCUUCAGUGAACAUUCAACGCUGUCGGUGAGUUUGGAAUUUAAGUGAAAACCAUCGACCGUUGAUUGUACCCUCCAGCUAACCAUCCUCCUCCU	--	--	166.502	175.04	169.826	173.646	162.346	154.754
gga-miR-181b-2-3p	--	TCACTGATCAATGAATGCAAA	--	17	+	9797660	9797744	CUAAUGGCUGCAAUCAACAUUCAUUGCUGUCGGUGGGUUUUCAUUGCUAUCAACUCACUGAUCAAUGAAUGCAAACUGCGGACCA	--	--	2.10822	2.13404	2.18182	2.99602	2.06335	3.81945
gga-miR-1628	--	AAGAGCTCTTCCTGTTGTGACC	--	4	+	1916483	1916579	GGCUUCUGGAGGCAGUGAGAUCACAACAGCUCAACUUCCUUCUGUGGGCAAACAAGAAAGAGCUCUUCCUGUUGUGACCUUGCGUUUCUCUCCUGCC	--	--	0.281096	0	0	1.23124	1.00973	1.18535
gga-miR-1690-5p	--	TCCAGAGGCAAAGGAGCACTGCT	--	1	+	84955062	84955165	GAUGGCUUCCAGCAGGGUGCGUAUCCAGAGGCAAAGGAGCACUGCUGCUAAAUGGGACACGGCAGAGCUGCUUUCUCUGUGAUGAUGCACUCUGCGUAGUCAUU	--	--	0.140548	0.388007	0.356216	0.123124	0.131703	0.263411
gga-miR-1651-3p	--	TTGCTTTTGTTGGCCTCTGCTG	--	1	+	1178464	1178547	UCCAGGGGGUGGAAGCUAAGACUGAUAAAAGCAAGCAAAUUAUUUACAGUUUGCUUUUGUUGGCCUCUGCUGCCGGGUCCUGGA	--	--	3.3263	3.10406	3.65121	1.72374	1.93165	1.93168
gga-miR-6571-3p	--	TGAGAGACCACATACAGCTTTGAAA	--	2	+	64365096	64365201	UCAUUUGUUGGCUUGAGGUUGUAAAGCUGUUUGGAUCUUCAGGGAAAUUGGCAACACUGAGAGACCACAUACAGCUUUGAAAACCUAAUUGCUGAAAUAUUCUGCC	--	--	0	0	0	0	0	0.0439018
gga-miR-455-3p	--	TGCAGTCCATGGGCATATACAC	--	17	+	5073848	5073933	UCCCUGGUGUGAGGGUAUGUGCCCUUGGACUACAUCGUGGAAGCCAGCACCAUGCAGUCCAUGGGCAUAUACACUUGCCUCAAGGU	--	--	43.2419	49.8105	53.7441	58.443	57.686	47.0188
gga-miR-1458	--	TTCCTGTGATGCTCATGAGAA	--	9	+	10813162	10813271	UUAGUUCAGCCUCAUUUUUUUUAGAGUUCUGGAGUAUCUUAUUGCACAAAAUAUGCUGAGGAGAAAUUCCUGUGAUGCUCAUGAGAAAAAUUGUAGAGCGCUUUUACACU	--	--	1.78027	1.94004	0.801486	2.70873	1.49264	1.18535
gga-miR-375	--	TTTGTTCGTTCGGCTCGCGTTA	--	7	+	22344638	22344702	CCUGGCGUCGAGCCCCACGUGCAAGACCUGACCUGAACGUUUUGUUCGUUCGGCUCGCGUUAGGC	--	--	176.762	128.77	162.301	266.646	230.437	266.045
gga-miR-2184a-3p	--	GCATGTGAGCTCCTACTGCCGC	--	19	+	5662689	5662744	AACAGUAAGAGUUGAUGUGCGGCGAACGCAGCCUGCAUGUGAGCUCCUACUGCCGC	--	--	0	0	0	0.0820828	0.0439011	0
gga-miR-1556	--	TGCAGGCTGGAAGTAGGAGTGT	--	Z	+	34656766	34656851	GUAACUGUGUCUUCAGACUUCCACUUACUGCUCUCCGUAUUAACUCAAUAUGCAGGCUGGAAGUAGGAGUGUGAAAGUAUGGUCAU	--	--	0	0	0	0	0.0878022	0.131705
gga-miR-1620	--	ACTTTAATGGGCTTTGGATCAC	--	8	+	18847849	18847936	UGCAAUAUGGGCUUGAUCCAAAGCCUGUUUAAGUCAGUGGACUGAUUCCCAAUGACUUUAAUGGGCUUUGGAUCACACCCUAAUUGCA	--	--	0	0.0485009	0	0	0	0
gga-miR-6601-3p	--	GATGTCTGTGGCTCTGGGCAG	--	2	+	23883660	23883769	UCCCACAUAGGCUGUUCCUGCUGGCUGCCCAGUGCCAGGUCUCAUCCCUUUGGGAUCAGGGAUGUCUGUGGCUCUGGGCAGAGGACAUGGGAGGUGCUCCUUCAGGACAU	--	--	0	0	0	0.0410414	0	0
gga-let-7a-2-3p	--	CTGTACAACCTCCTAGCTTTCC	--	24	+	3372658	3372729	AGGUUGAGGUAGUAGGUUGUAUAGUUUAGAAUUACACCAAGGGAGAUAACUGUACAACCUCCUAGCUUUCCU	--	--	9.22932	8.97267	7.03526	7.83891	8.64851	8.29743
gga-miR-30e-5p	--	TGTAAACATCCTTGACTGG	--	23	+	5078843	5078938	CGGGGCAGUCAUCGCUGCUGUAAACAUCCUUGACUGGAAGCUGUGAGGUGUCAGCGGGGGCUUUCAGUCGGAUGUUUACAGCUGCAGGCUGCUGCA	--	--	1622.95	1786.34	1259.22	1367.71	1403.83	1610.84
gga-miR-458b-3p	--	ATAGCTCTGAAAATGGCGCTG	--	13	+	8954761	8954862	AUGCUGUUUUUCCAGUACAUAUGGCAGUACCAUUCAAAGAGCUAUGACAAUGACGCUGUUUAUAGCUCUGAAAAUGGCGCUGCCAUCUGCACCACGGCCGCG	--	--	0	0	0	0.205207	0	0.0878035
gga-miR-148b-5p	--	GAGGTTCTGTCCTACACTCCGGCT	--	33	+	7737150	7737210	CGAGGUUCUGUCCUACACUCCGGCUGUGGCUAUGGGCAGUCAGUGCAUCACAGAACUUGGU	--	--	45.4438	39.2858	42.2561	32.8742	36.6135	41.7506
gga-miR-1583	--	CGTAGGGCCGTGGGACGGCA	--	Z	+	70938728	70938825	UCGCUGGGCGGAGGGCGCGGGUCGCCUUCCGUCCCGCGGCUCUCGGGCGGCCGUAGGGCCGUGGGACGGCAGCUCCGAGCCGUGCGCCGUGCCGGCGG	--	--	0	0	0	0	0	0.0878035
gga-miR-140-3p	--	CCACAGGGTAGAACCACGGAC	--	11	+	19068658	19068752	UGCGUCUCUCCGUGUCCUGCCAGUGGUUUUACCCUAUGGUAGGUUACGUCAUGCUGUUCUACCACAGGGUAGAACCACGGACGGGAUGCCGGGGC	--	--	2426.75	2395.56	2400.27	2316.46	2269.47	2377.19
gga-miR-6542-5p	--	GTCTGCCAGCATCAGCCCCAGT	--	3	+	4424282	4424408	AGCGGCCCCUCGUUCCCCAUCACGAAUUACCUGGCGCCAGUGUCUGCCAGCAUCAGCCCCAGUGCCGUCACCAGUGCCAACGGGACAGUGCUGAAGACUACUGGAGCCAGUGCAGUGACAUCCGGGG	--	--	0	0	0	0	0	0.0439018
gga-miR-1813	--	TTCTGTGGCTGCAAGGAGAG	--	10	+	17024307	17024380	GCAUAAGAACUUCUGUGGCUGCAAGGAGAGCUGCCAAUGCGCUUGCAGAAAUAGCAGCAGUAUUUUAUUCUUGC	--	--	0.0468493	0	0	0	0	0.0878035
gga-miR-1465	--	TTTCAGAGGTGCTGGGTGCTT	--	17	+	8468029	8468138	GCAAGGUGUUAAUGAUGAGCCUUUCAGAGGUGCUGGGUGCUUAUGGCUCCCACGAAGGUCACUUAGAGCUUUGUACACUAACACUCCUGGAAAGGUUCUGGCUGGCACCC	--	--	0.0936986	0	0	0.0410414	0	0
gga-miR-7463-5p	--	TGAGTCTCCTTGAAAGTAATGG	--	3	+	1064693	1064754	UGAGUCUCCUUGAAAGUAAUGGCAUGUGAUUGCUUACCCCAUUACUUUCAAUGGGACUAAGU	--	--	0.140548	0.0485009	0.044527	0.0410414	0	0
gga-miR-6594-5p	--	TGGGGGTGGCGTGAGTTGTGG	--	4	+	596830	596939	UCUGCUUUGCACCACAGGGUUGGGGGUGGCGUGAGUUGUGGCUGGGCUUUGGUGCCCACUCUCAGCUCAUGUCAUCCCACAGGGUGAUGCACAGGAGGGGCACUAUGGGG	--	--	1.07753	1.11552	0.979594	0.943953	1.31703	0.74633
gga-miR-1416-3p	--	ACAATTGTATGAGTTGAGTACA	--	Z	+	34934091	34934179	UGAGGCUGAUACUUUUUCCUUAACUCAUGCCGCUGUGCCUUUAUAUUUUAUUUCACAAUUGUAUGAGUUGAGUACAGAGUAUCAGUCCA	--	--	0.0468493	0.0970019	0.089054	0.0820828	0	0.131705
gga-miR-1734	--	ATATGCCCCAATGTATAAGCT	--	3	+	46337543	46337626	UCAGAUGCUGAAAUAUGCCCCAAUGUAUAAGCUAUUUGUACUUCUGCUCAGUGCUUAUGUAUUGAGGCAUAUUUCAGCAUCUGA	--	--	0	0	0.044527	0	0	0
gga-miR-30c-2-3p	--	TGGGAGAAGGCTGTTTACTCT	--	3	+	82370044	82370115	AGGUACUGUAAACAUCCUACACUCUCAGCUGUGGAAACUAAGAAAGCUGGGAGAAGGCUGUUUACUCUCCCU	--	--	229.234	224.511	229.358	254.908	237.022	232.899
gga-miR-1777	--	GTGGGCGGTGCGGGGCGGCG	--	28	+	3317573	3317667	GCUUCACCUUCCCCUCCAGCUGUGGGCGGUGCGGGGCGGCGUCAGGGCCCACUGCCACAGCGGCGUCACCGCAUCGCCCGGGGUGGGAGUGGGGC	--	--	0	0	0.044527	0	0.0878022	0.0878035
gga-miR-1760	--	TACCTCCTGTCTGACTGATTTAT	--	5	+	4082215	4082307	UGCAGUAUGCUGUUAUGGUAUCAGUCUAACAGCAGGUGUGGCAUAAACACAUACCUCCUGUCUGACUGAUUUAUUGUCUCAGAAUACCGUGCA	--	--	0.140548	0.291006	0.089054	0.28729	0.0878022	0.175607
gga-miR-1557	--	CCCGTCGGCTGAGCGGCTGC	--	2	+	112907809	112907878	GUGAGGCAAUUCCAGCCGCUCAGCCGACGGGCAGGCUCACCCGUCGGCUGAGCGGCUGCAAUUGCCUCAC	--	--	0.936986	0.53351	1.29128	0.410414	0.614615	0.74633
gga-miR-6554-3p	--	TGCTGTGTGGTTTAAGGATACT	--	2	+	6830869	6830974	UAGCUGUUAAUCCUUUGAGUGUUUUUACAUUACACAGCAUAUGUCCAGUGAAAGUUCUGCUGUGUGGUUUAAGGAUACUCACUGAUUCUCCAGCAACUGCAAACAG	--	--	0.0468493	0	0	0	0	0
gga-miR-726-5p	--	GGAATTCCGCCCGTTCTGAGCTC	--	KZ626833.1	+	219368	219425	GGAAUUCCGCCCGUUCUGAGCUCUGGAGGCGCUGAGUUCACCACCGGCAGAACUCGGC	--	--	0.140548	0.194004	0.267162	0.369373	0.219505	0.351214
gga-miR-1388a-5p	--	AGGACTGTCTAACCTGAGAATG	--	20	+	9510180	9510267	GCGAGGGGCACCUCGAGGACUGUCUAACCUGAGAAUGGUGAAACAUGAGGGUCAAUCUCAGGUUCGUCAGCCCAUGAGAUGCCUUCUC	--	--	69.1027	47.5794	42.3897	39.1535	42.3206	34.9897
gga-miR-338-5p	--	AACAATATCCTGGTGCTGAGT	--	18	+	9290657	9290741	GCUCCUCCUGCCCAACAAUAUCCUGGUGCUGAGUGAGUUGCACACAGAGACUCCAGCAUCAGUGAUUUUGUUGAGGAAGGGGAGC	--	--	19.4425	14.8413	14.4713	18.7149	16.1117	19.3607
gga-miR-12221-2-3p	--	TGCCATCGTCCTTTGTCCGCTG	--	12	+	5715220	5715298	AGCGGACAAAGGACGAUGGCACACGAAGUGCUCUGGAGGCCUGUGACAGUUCAUGUGCCAUCGUCCUUUGUCCGCUGCU	--	--	0	0.0485009	0	0	0	0
gga-let-7c-5p	--	TGAGGTAGTAGGTTGTATGGTT	--	1	+	100395760	100395843	GCAUCCGGGUUGAGGUAGUAGGUUGUAUGGUUUAGAGUUACACCCUGGGAGUUAACUGUACAACCUUCUAGCUUUCCUUGGAGC	--	--	1028.48	1064.84	950.874	1132.41	1133.09	1158.61
gga-miR-12207-3p	--	CTGCTCCCTCCCGGCTGCCTG	--	1	+	421772	421832	ACGCAGCACGCAGGAGAGCCGAGGCACUAUGGAAACACUCUGCUCCCUCCCGGCUGCCUGC	--	--	0.187397	0.291006	0.311689	0.0410414	0.0878022	0.0878035
gga-miR-12290-5p	--	TGGGGGTGCCGTTGGGGTCAGT	--	30	+	1338285	1338338	UGGGGGUGCCGUUGGGGUCAGUGGGGUGCGGCUGACCCCCACGUGCCCCCCAGG	--	--	0	0	0	0.0410414	0	0.0439018
gga-miR-6568-3p	--	ACAACCAAGATGGCGCCCGGGC	--	3	+	55290512	55290609	CCGGCUGCCCGCCCACCCCGCGGCCGCCAUCUUGCUUGCGGCCGGCUACCCACAACCAAGAUGGCGCCCGGGCGGUUGGCGGUGCCGGCACCACCCCA	--	--	0	0	0.044527	0.205207	0.0878022	0.175607
gga-let-7c-3p	--	CTGTACAACCTTCTAGCTTTCC	--	1	+	100395760	100395843	GCAUCCGGGUUGAGGUAGUAGGUUGUAUGGUUUAGAGUUACACCCUGGGAGUUAACUGUACAACCUUCUAGCUUUCCUUGGAGC	--	--	10.8222	9.55468	8.94992	7.79787	8.86802	8.16573
gga-miR-3534	--	TGTGGGTTGACAGTGCTGAGGT	--	33	+	3808915	3808996	UGGGACUGGGGGGGUGUGGGUUGACAGUGCUGAGGUCUCCCCAAGCCCCCGAGCUCUGCUGCCCCACAUCUCCCCCCCCCCA	--	--	0.234247	0.339506	0.267162	0.246249	0.219505	0.307312
gga-miR-181b-5p	--	AACATTCATTGCTGTCGGTGGG	--	17	+	9797660	9797744	CUAAUGGCUGCAAUCAACAUUCAUUGCUGUCGGUGGGUUUUCAUUGCUAUCAACUCACUGAUCAAUGAAUGCAAACUGCGGACCA	--	--	712.719	713.012	634.688	787.133	707.027	726.048
gga-miR-12276-5p	--	TGACCCCAACCTCGCTACCACC	--	4	+	90047707	90047765	CUGACCCCAACCUCGCUACCACCUCCUUUGAGGGAGUUGUAGAGAGUGGUGGGGUCUCU	--	--	0	0	0	0	0.0439011	0
gga-miR-1434	--	GTGCGTGATGATGGAAAATT	--	28	+	1557064	1557140	AGUGCGUGAUGAUGGAAAAUUUCUUCACUUUGACCUGACUUGUUUGAUUGAAGAAAUUUGAGUAUCUGACGCGAGCU	--	--	2.01452	2.47355	1.1577	2.29832	1.62434	1.58046
gga-miR-1579	--	CGTGGCGGGAAGGGATGGGCG	--	6	+	3395649	3395715	GCCGUGGCGGGAAGGGAUGGGCGCGUGCGCGGGCUCCGCCUCACCGCCGUCUGCCGCCCAGCCAGGC	--	--	0.0468493	0.0485009	0	0	0.0878022	0.0878035
gga-miR-122-3p	--	AACGCCATTATCACACTAAATA	--	Z	+	761054	761130	CAGAGCUAUGGAGUGUGACAAUGGUGUUUGUGUCCAAUCUAUCAAACGCCAUUAUCACACUAAAUAGCUACUGGUAG	--	--	0	0	0.044527	0	0	0
gga-miR-12266-3p	--	AAGGGCAAACCCGATGGGCACC	--	30	+	828734	828791	GCCCCCAUCGAUUUGCUCUACGAACUGAUGAAGCAGAAGGGCAAACCCGAUGGGCACC	--	--	0.187397	0.291006	0.133581	0.369373	0.263407	0.219509
gga-miR-6550-3p	--	GCTCCACCCTCGGCTGCTTTGA	--	10	+	19590883	19590982	GCUUGCAGGUAGGAGCUUCAAAGCAGCCCAGGAAGCGCUGCUGCAAAACGUGGCUCCACCCUCGGCUGCUUUGAAGUUCCCACUUCCAGCACUUCUUCCU	--	--	2.29562	1.55203	2.04824	2.05207	2.06335	2.5024
gga-miR-12273-5p	--	CTGCCCGCGGCGCCCGGCCGCG	--	4	+	77374170	77374222	CUGCCCGCGGCGCCCGGCCGCGGCUCAGGCGCGGCCGGUCGCCGCGGGCAACG	--	--	0	0	0	0.0820828	0	0.0439018
gga-miR-214	--	ACAGCAGGCACAGACAGGCAG	--	8	+	5026477	5026586	GGACUGGCUGGACGGAGUUGUCAUGUGUCUGCCUGUCUACACUUGCUGUGCAGAACAUCCUCUCACCUGUACAGCAGGCACAGACAGGCAGUCACAUGACAACCCAGCCU	--	--	486.952	529.97	521.055	491.471	454.025	463.032
gga-miR-1656	--	TCACCAGCGGGCATTGGCATCA	--	1	+	134884196	134884261	UCUCUGUCACCAGCGGGCAUUGGCAUCACUGGCAUGGCUGUGAUGUCAUGAGUGCUGGCAGCAGGA	--	--	0.0468493	0.145503	0.267162	0.0820828	0.39511	0.351214
gga-let-7i	--	TGAGGTAGTAGTTTGTGCTGT	--	1	+	33181712	33181795	CUGGCUGAGGUAGUAGUUUGUGCUGUUGGUCGGGUUGUGACAUUGCCCGCUGUGGAGAUAACUGCGCAAGCUACUGCCUUGCUA	--	--	18180.2	16307	10895.4	16517.2	15740.8	19092.4
gga-miR-12219-5p	--	AGGAGCAGGGGGTGGTCAAGCTGA	--	11	+	1403739	1403798	AGGAGCAGGGGGUGGUCAAGCUGACGGACUUUGGCUUCAGCAACCGCUUCCAGCCCGGCA	--	--	0	0	0	0.0410414	0	0
gga-miR-203a	--	GTGAAATGTTTAGGACCACTTG	--	5	+	50883048	50883145	CUCAGCCUCCUUGGUGCAGUGGUUCUUAACAGUUCAACAGUUCUCUAUCAUAAUUGUGAAAUGUUUAGGACCACUUGACCAGCGAGGCCCGGGCAUCG	--	--	2000.89	2140.35	3996.12	2538.21	2563.74	2631.25
gga-miR-99a-3p	--	CAAGCTCGCTTCTATGGGTCT	--	1	+	100395008	100395088	CCAAUUGGCAUAAACCCGUAGAUCCGAUCUUGUGUUGAAAUGCACUGCACAAGCUCGCUUCUAUGGGUCUGUGUCAGUAUG	--	--	2.10822	2.23104	3.65121	1.96999	1.71214	1.97558
gga-miR-6576-5p	--	TCATGGTTGTATCTGAACACTTT	--	22	+	197998	198103	CUACAAGCAGUGUGUUUUCUCAUGGUUGUAUCUGAACACUUUGAAGGUAAAUAAAUGGAAAAGUGUCUGUAUUCCCUUGAGAGAACAUGCUGUUAGUGCUACCAUC	--	--	0.0936986	0.0970019	0	0.164166	0	0
gga-miR-6657-3p	--	ACATGGTGGGAGAAGGGTGAC	--	6	+	21029050	21029159	AGGGAAAUCAGGCUCGCUGCUGCUGCCCCCUCUUUCACCAGGGUCUGGUUUGUACUGUGUUGGACAUGGUGGGAGAAGGGUGACCAGCACACUGAGCUGAUGAUCCUACU	--	--	0.140548	0	0.044527	0	0.0878022	0.0878035
gga-miR-30a-5p	--	TGTAAACATCCTCGACTGGAAG	--	3	+	82345430	82345501	GCGACUGUAAACAUCCUCGACUGGAAGCUGUGAAGCAGCAGAUGGGGCUUUCAGUCGGAUGUUUGCAGCUGC	--	--	24185.3	23031.5	17780.9	22860	20725.4	24372.2
gga-miR-1655-3p	--	ATTTACCCATGGTGGGCTGATA	--	8	+	7875904	7876006	GGGGAAACGUGUUUCAACACUGUGUCAGCUGGUCUUGGGUAAAUGCUAUUGUUCCUGCAGUAUUUACCCAUGGUGGGCUGAUACAGUGCUGGAGCACAGCCUC	--	--	0	0.0970019	0	0.0410414	0.131703	0.0439018
gga-miR-455-5p	--	TATGTGCCCTTGGACTACATCG	--	17	+	5073848	5073933	UCCCUGGUGUGAGGGUAUGUGCCCUUGGACUACAUCGUGGAAGCCAGCACCAUGCAGUCCAUGGGCAUAUACACUUGCCUCAAGGU	--	--	156.758	178.047	145.737	173.687	160.854	159.363
gga-miR-460a-5p	--	CCTGCATTGTACACACTGTGTG	--	2	+	3746348	3746437	CUGACUAUAUAGCACCUGCAUUGUACACACUGUGUGUGUUAACUGGAAAUGCACAGCGCAUACAAUGUGGAUUCUGUAGAAGUCACUCAC	--	--	31.6233	43.6508	51.5622	43.3397	43.506	33.7605
gga-miR-6585-5p	--	AATCAGAACGTGCTGTGAGCT	--	19	+	5202806	5202915	UACUGAAAAUGAAGACAGGAAUCAGAACGUGCUGUGAGCUACUUUGCAUGUGAGCUACCUGUUUAUUUUGCUGUAGUGAGGAGCUUAUUUUGGAGCACGUAUUGGUUCAU	--	--	0.0936986	0	0	0	0	0
gga-miR-181a-5p	--	AACATTCAACGCTGTCGGTGAGT	--	17	+	9796020	9796110	GCCAUCUUUGGAUAGCUUCAGUGAACAUUCAACGCUGUCGGUGAGUUUGAGAACUAAGAAAAACCAUCGACCGUUGACUGUACCUUGAGGU	--	--	797.61	789.838	711.319	929.342	811.204	805.598
gga-miR-9-5p	--	TCTTTGGTTATCTAGCTGTATGA	--	Z	+	60673629	60673715	GGAAGCGAGUUGUUAUCUUUGGUUAUCUAGCUGUAUGAGUGUUUUGGUCUUCAUAAAGCUAGAUAACCGAAAGUAAAAACUCCUUCA	--	--	173.342	139.634	100.987	215.385	236.1	261.347
gga-miR-367	--	AATTGCACTTTAGCAATGGTG	--	4	+	57085215	57085287	AGGCUAAUACUGUUGCUAACAUGCAACUCUGUUGUAUAAAAAUUGGAAUUGCACUUUAGCAAUGGUGAUGGAC	--	--	0	0	0	0	0.131703	0
gga-miR-147	--	GTGTGCGGAAATGCTTCTGC	--	10	+	11118947	11119016	AAUCUAGUGGAAUCACUUCUGCACAAACUUGACUACUGAAAUCAGUGUGCGGAAAUGCUUCUGCUACAUU	--	--	2.43616	2.91006	2.09277	1.35437	2.59016	1.97558
gga-miR-1787	--	TGTTGTTTACGGAAGGGGGA	--	12	+	9157570	9157659	GCCGGUCCUUUUCCCCCUUCCCUAAACCUCUCUUUGCUUCCAUGGUGCGGUGGUCAGUGUUGUUUACGGAAGGGGGAAAAAAAACGAGGC	--	--	0	0	0	0	0.0878022	0
gga-miR-2129	--	CAGCAGGACTGGCTTTGTTACGA	--	14	+	4402727	4402810	GGGAAGGCUGCAGUGGGACAAGGACCAGGAUACUGCAGUGCUGUGACAGCAGCAGGACUGGCUUUGUUACGAGGAGCCUCACCC	--	--	0.468493	1.01852	0.267162	2.33936	0.79022	0.526821
gga-miR-1b-3p	--	TGGAATGTTAAGAAGTATGTA	--	23	+	4489739	4489802	ACAUACUUCUUCAUAUGCCCAUAUGGAGUCGGCCGGCGUUAUGGAAUGUUAAGAAGUAUGUAUC	--	--	43.0545	86.9622	360.312	38.7021	69.232	42.8042
gga-miR-302a	--	AAGTGCTTCCATGTTTTAGTGA	--	4	+	57084744	57084810	CCACAACUUAAAUGUGGAUGUGCUUGCUUUGUUCUGAAAAGAAAGUGCUUCCAUGUUUUAGUGAUGG	--	--	1.54603	2.23104	5.03155	2.29832	15.6288	5.18041
gga-miR-122-5p	--	TGGAGTGTGACAATGGTGTTTGT	--	Z	+	761054	761130	CAGAGCUAUGGAGUGUGACAAUGGUGUUUGUGUCCAAUCUAUCAAACGCCAUUAUCACACUAAAUAGCUACUGGUAG	--	--	4.73178	9.06967	26.7607	1.43645	14.3996	5.31211
gga-miR-425-3p	--	CATCGGGGATGTCGTGTCTGTC	--	12	+	12045651	12045713	AAUGACACGAUCACUCCCGCUGAGCGCGCAGCCACAGAGCCAUCGGGGAUGUCGUGUCUGUCC	--	--	58.1869	45.8334	51.0279	47.4439	51.0131	53.5602
gga-miR-6562-3p	--	TCAGTCATTTCTTGCTCTCTGT	--	2	+	79566854	79566962	UCUUUUGUAGCUCCGGAGUUCUUGUAGGGGAAAGGAAUGUGCUGUGGUGGGAAUUUCAGACGCCUCAGUCAUUUCUUGCUCUCUGUCAGGAUCUCGGGUGAUCCUGAGGG	--	--	0.281096	0.679013	1.02412	0.779787	0.263407	0.307312
gga-miR-1651-5p	--	GCTAAGACTGATAAAAGCAAGC	--	1	+	1178464	1178547	UCCAGGGGGUGGAAGCUAAGACUGAUAAAAGCAAGCAAAUUAUUUACAGUUUGCUUUUGUUGGCCUCUGCUGCCGGGUCCUGGA	--	--	0.0468493	0	0	0	0	0
gga-miR-6624-3p	--	TCCAGGGAAGGGCTTCTGTTT	--	7	+	16257302	16257411	CCCCCCCCCCCCCAGUGUCCCCUGCUGCAGAAGCUCCCACUGAGGCAACACAGGCAGCACUGGCUCCAGGGAAGGGCUUCUGUUUGCAGAACACAACUGCUCUGAUUACA	--	--	0	0	0	0.0410414	0	0
gga-miR-1763b-3p	--	AAGGGCGGGAAAGGAAGGCGA	--	5	+	57739047	57739103	UCGCCUUCCCUUCCCGCCCUUCCGGAAGGGCGGGAAGGGCGGGAAAGGAAGGCGAAG	--	--	0.140548	0	0	0.123124	0.131703	0.0439018
gga-miR-1594	--	TGGTGGGGATGGGTTGGGGTT	--	Z	+	193844	193934	GGGACACUGUCGGUGGGCAUGGUGGGGAUGGGUUGGGGUUGGGCUUCGGGAUCUUGGAGGUCUUUCCCCACCUUCAUCAUUCUAUUGUUCU	--	--	0	0	0	0	0.0439011	0.0878035
gga-miR-1691	--	TCAGCTGACCTGGGCCTGCAGTG	--	1	+	46267700	46267790	UCAGCUGCCGGGUGGCUGUGUGCCUGGAGCAGCCAGAGCUUUUGAAGUAGCUCAGCUGACCUGGGCCUGCAGUGCCCCCCAGAAGCGCUGG	--	--	0.0468493	0	0	0	0.0878022	0.0878035
gga-miR-1649-5p	--	TCCTGCAGAAGGTGCGGCTG	--	3	+	21953061	21953158	GUGCUGUUGGCUCUCCUCCUCCUCCUGCAGAAGGUGCGGCUGUGCGCUCCCCAACGGCUCCGUGCACUCUGCAGGCACAGGAGUGAGCCCUGACCCAC	--	--	2.15507	1.64903	1.73655	2.33936	2.50236	1.93168
gga-miR-210a-3p	--	CTGTGCGTGTGACAGCGGCTAA	--	5	+	16094296	16094382	CAGGAGCAGGUGAGCCACUGACUAACGCACAUUGUGCUCUCGGCGACUCCACUGUGCGUGUGACAGCGGCUAACCUGCUCCUCGGAC	--	--	13.3989	20.4189	30.501	16.4987	21.9944	14.3559
gga-miR-1742	--	AATCGTCGTTCGGGATCCGC	--	1	+	51726988	51727070	GCGCUCCCCGGCGAGGGUGGGGCCUGAGCGCUGAUUGGCGUUAUUCUCCACCAAUCGUCGUUCGGGAUCCGCCCCUGCGGUGC	--	--	0	0.0970019	0.044527	0	0.0439011	0
gga-miR-1807	--	GCAGAATGAGGCTAGAGCTGAG	--	24	+	3199973	3200062	GGCUUUCAGAAGAGCUCAGCAUUAGCCUAAUUUUGCUCCCAGUGGUAUCGAAUGAGGCAGAAUGAGGCUAGAGCUGAGCUUCUGAAAGCU	--	--	0	0	0.089054	0	0	0
gga-miR-383-5p	--	AGATCAGAAGGTGATTGTGGCT	--	4	+	63986770	63986842	CUCCUCAGAUCAGAAGGUGAUUGUGGCUUUGGGUAAAUAUUGAGCAGCCACAGCACUGCCUGGUCAGAAAGAG	--	--	6.32466	6.69313	4.71986	4.35039	4.47791	2.94142
gga-miR-460b-5p	--	TCCTCATTGTACATGCTGTGTG	--	4	+	2699809	2699898	CUCAGAUCUGGCUCUACGUUGUCCUCAUUGUACAUGCUGUGUGUAUUUGCCACGUACACAGCGCAUGCAAUGUGGACAUAAUGGAGCUCA	--	--	15.5071	25.948	29.0761	10.6708	10.7119	10.273
gga-miR-1765	--	CGGAGCGCGGCCCTGCGCTG	--	18	+	5836983	5837087	CGAGGGCUCCCGGCAGCCACGGGAGGAGCGGAGCGCGGCCCUGCGCUGCGGGCCCGGAGCCGCGGGGAGCGCCUGUGCCGUGCGGGGGUUGCGGGCUGCGGGUCG	--	--	0.0468493	0	0.133581	0.0410414	0.0878022	0.175607
gga-miR-222b-3p	--	AGCTACATCTGATTACTGGGTCAC	--	4	+	2169309	2169419	GAGACACGGUGCCCUUGGCUGCUCAGUAGUCAGUGUAGGAUCUGUCCGACAGUCUCACUAACAGCUACAUCUGAUUACUGGGUCACCAAAGGACCACCACCGCGCUGCAUG	--	--	0.562192	0.921518	0.667905	0.410414	0.439011	0.307312
gga-miR-23b-5p	--	GGGTTCCTGGCATGATGATTT	--	Z	+	41660626	41660711	UGUUGUGGCUGUUUGGGUUCCUGGCAUGAUGAUUUGUGAGUUAAGAUUAAAAUCACAUUGCCAGGGAUUACCACAUAGCCAUGACC	--	--	0.936986	1.40653	0.979594	2.01103	1.44874	1.09754
gga-miR-191-5p	--	CAACGGAATCCCAAAAGCAGCTG	--	12	+	12045267	12045326	CAACGGAAUCCCAAAAGCAGCUGUCCCCGCAGCGCCCAGCUGCCCUGGGAUUUCGUUACC	--	--	677.301	639.97	632.951	536.329	578.792	602.727
gga-miR-6696-3p	--	GGGAGACTTGCCTGATAACAGCT	--	17	+	5062654	5062756	UCAUUCUGCUGAAGCGAGUAGCUGUGAUCUCAAGCCCCCACAGGCAGCUCAGAGUGGGAGACUUGCCUGAUAACAGCUGCAUGCAAAGCAAGAUUGUCUGCAU	--	--	0.0468493	0.0970019	0	0.123124	0.219505	0.175607
gga-miR-1388a-3p	--	ATCTCAGGTTCGTCAGCCCATG	--	20	+	9510180	9510267	GCGAGGGGCACCUCGAGGACUGUCUAACCUGAGAAUGGUGAAACAUGAGGGUCAAUCUCAGGUUCGUCAGCCCAUGAGAUGCCUUCUC	--	--	18.5055	12.5617	8.4156	13.9541	11.8972	10.0535
gga-miR-6677-5p	--	CTCACTGCCTGCCCTGAGCACACCA	--	20	+	13075092	13075200	AGCUUAAUGCAAGCUCCUUCUCACUGCCUGCCCUGAGCACACCAUCAAGCAUUGGUGCUCAGACACGUCAGGAGGAGGUACUGUGCAAACGCCCUGCAAAGGGAUUCUG	--	--	0.281096	0.145503	0.089054	0.164166	0.131703	0.263411
gga-miR-383-3p	--	CCACAGCACTGCCTGGTCAGA	--	4	+	63986770	63986842	CUCCUCAGAUCAGAAGGUGAUUGUGGCUUUGGGUAAAUAUUGAGCAGCCACAGCACUGCCUGGUCAGAAAGAG	--	--	0.0936986	0.145503	0.044527	0	0	0
gga-miR-1680-3p	--	CAGGCGGTATCAGGAGGCTGA	--	10	+	16308512	16308600	GCUGGGCACUGCUUUCCUCCUGGGUACAACUCUGCUGUCUUUGUACUUUCUACUUGCAGGCGGUAUCAGGAGGCUGAGCUGUGCCCAGC	--	--	0.0468493	0	0.178108	0	0	0
gga-miR-1669	--	GTGGGCTCAGAGCAGGCACA	--	26	+	3626795	3626885	GCCCCCGCUGCCGGCUGCGCUGCUCUGCGCCCAAACGGACGUCGUGCCCGGAACCGUGGGCUCAGAGCAGGCACAGCUGGCGGGGAGGGGC	--	--	0	0	0.311689	0.0410414	0	0.0439018
gga-miR-196-5p	--	TAGGTAGTTTCATGTTGTTGG	--	33	+	7592214	7592321	UUUCAUGCAGCUGAUCUGUGGUUUAGGUAGUUUCAUGUUGUUGGGAUUGGCUUUUAGCUCGGCAACAAGAAACUGCCUUAAUUACGUCAGUUAGUCUUCAUCAAGGGC	--	--	290.138	301.53	191.689	294.595	313.761	310.298
gga-miR-12278-3p	--	CTGATCAGCCACTTGAGGGAG	--	5	+	9262500	9262561	AUCCUUCAAGUGCCUGAUAACAGUAGGCUUUCAGAGUGUACUGAUCAGCCACUUGAGGGAGG	--	--	0.0468493	0	0	0.123124	0.0878022	0.0439018
gga-miR-458b-5p	--	AGTACCATTCAAAGAGCTATGA	--	13	+	8954761	8954862	AUGCUGUUUUUCCAGUACAUAUGGCAGUACCAUUCAAAGAGCUAUGACAAUGACGCUGUUUAUAGCUCUGAAAAUGGCGCUGCCAUCUGCACCACGGCCGCG	--	--	0	0.242505	0.044527	0.369373	0.175604	0.175607
gga-miR-3540	--	ATGGTGGAAGAACAAGGCCTGC	--	10	+	11510568	11510629	AGGAAAUGGUGGAAGAACAAGGCCUGCCCGCGAGGUAAGGGCAGGGCCUGCUUCCUCCACCU	--	--	0.0936986	0.339506	0.267162	0.123124	0	0.395116
gga-miR-1648-3p	--	TGGGAGTGGAGCGGAGCTGTC	--	20	+	13817409	13817494	UGGCCGGCGGCUCGGCUCGGCUCCGCUCACACCAGGAGCAGCGGCUCGGCGUGGUGGGAGUGGAGCGGAGCUGUCCGCCGUAGCCG	--	--	0	0	0	0.0820828	0.0878022	0
gga-miR-7452-5p	--	ACAGGGCTGGCTGATCCGTGC	--	1	+	107947566	107947633	ACAGGGCUGGCUGAUCCGUGCACUUUCACUUAAUGAUGUUGCGCGGAUUCUUGAACCAGUCCUGCUGC	--	--	0.187397	0.0485009	0.089054	0.0820828	0.0878022	0
gga-miR-199-5p	--	CCCAGTGTTCAGACTACCTGTTC	--	8	+	5020623	5020730	GAAGCGUCCGGAGAUCCUGCUCCGUCGCCCCAGUGUUCAGACUACCUGUUCAGGACAAUGCUGUUGUACAGUAGUCUGCACAUUGGUUAGACUGGGCAAGGGAAAGCA	--	--	3477.53	3683.55	2987.94	2976.08	2887.64	3144.07
gga-miR-1673	--	GGTGTGAGTGGAAGTCAGAGGT	--	15	+	1045215	1045314	GAGCGUGAUGUGCUGGGGAUCUCAUGCUGUGCUUCACUCUCACUGCGGGGCCUGUGAGGUGUGAGUGGAAGUCAGAGGUGGAAGCCCUUGAUUAGAGUUU	--	--	0	0	0	0	0.0439011	0
gga-miR-7475-3p	--	ACGGGCGGGTGGGCGCGGT	--	9	+	3837514	3837578	CCGCCGCCGCCGCGCCCUCCGCACCGCGGCCGGCAGCGCUGUGAGGACGGGCGGGUGGGCGCGGU	--	--	0	0.0485009	0.089054	0.246249	0.0878022	0
gga-miR-6693-3p	--	TTTTCAGTCTGACACAGAACAT	--	28	+	4387579	4387688	AAAUAAAGAAUUUAUCUACGUUUGUAUACUUUGUGUCCAGUCCUGAAUGGUUCUUUAAAUUUCAUUUUCAGUCUGACACAGAACAUACAGGCUAGUUACUUACAAAGACA	--	--	0	0	0	0	0.0878022	0.0439018
gga-miR-30a-3p	--	CTTTCAGTCGGATGTTTGCAGC	--	3	+	82345430	82345501	GCGACUGUAAACAUCCUCGACUGGAAGCUGUGAAGCAGCAGAUGGGGCUUUCAGUCGGAUGUUUGCAGCUGC	--	--	772.826	725.331	722.628	915.101	790.044	847.831
gga-miR-101-3p	--	GTACAGTACTGTGATAACTGAA	--	Z	+	27510587	27510665	ACUAUCCUUUUUCGGUUAUCAUGGUACCGGUGCUGUAUACGUGAAAGGUACAGUACUGUGAUAACUGAAGAAUGGUGGU	--	--	2782.52	2720.56	2631.77	2867.44	2787.15	2752.86
gga-miR-1674	--	GGGCTATGATGCTGGATTTTCTGAG	--	6	+	23766962	23767057	GGUAAGAGCAUUCCUGCAGGGCUAUGAUGCUGGAUUUUCUGAGCAAAGGGAUGCUGUUGGGAUGUUUCGGUGGGUUGGUGCUGGCAGGCUUGGGCU	--	--	1.26493	1.55203	0.489797	1.23124	1.09753	0.834134
gga-miR-100-3p	--	AAGCTTGTATCTATAGGTATG	--	24	+	3364559	3364638	CCUGUUGCCACAAACCCGUAGAUCCGAACUUGUGGUCAUAUUCCACACAAGCUUGUAUCUAUAGGUAUGUGUCUGUCUGG	--	--	0.796438	1.35803	0.801486	0.902911	0.570714	0.570723
gga-miR-1551-3p	--	TGAGTTTGTGTTGCTGCTTTCT	--	14	+	5612805	5612894	AGGAGUUACUAUAGCUAGCAGCAAAAAGAACUUCAGAUGUGAUUAACUUGGAGCUCUGAGUUUGUGUUGCUGCUUUCUUAGUGCUCUCUU	--	--	0.749589	0.873017	0.44527	0	0.0439011	0.0439018
gga-miR-6543-3p	--	GCCTCCTTTCAGGTCACT	--	1	+	134916645	134916752	CCAUUCCCUUUUGUCCUGUUGCUGUUACCUGAGAGAAGAUGCUGACUCCCUCCGACCACAGCCUCCUUUCAGGUCACUGUAGGCAGCGCUAAGGUCUUCCCUGAGCCU	--	--	2.76411	1.69753	2.04824	0.902911	1.22923	1.00974
gga-miR-222b-5p	--	TGCTCAGTAGTCAGTGTAGGATCTGT	--	4	+	2169309	2169419	GAGACACGGUGCCCUUGGCUGCUCAGUAGUCAGUGUAGGAUCUGUCCGACAGUCUCACUAACAGCUACAUCUGAUUACUGGGUCACCAAAGGACCACCACCGCGCUGCAUG	--	--	1.54603	0.873017	0.89054	0.902911	0.263407	0.921937
gga-miR-24-5p	--	GTGCCTACTGAGCTGATATCAGT	--	Z	+	41661395	41661462	CUCCGGUGCCUACUGAGCUGAUAUCAGUUCUGAUUUUACAUACUGGCUCAGUUCAGCAGGAACAGGAG	--	--	1.73342	1.94004	2.09277	2.91394	2.50236	2.4146
gga-miR-6675-5p	--	ATACGTGAGGTTCATTGGGTTC	--	24	+	3371186	3371294	UUUGGGGCCUCCUGCCACCAUACGUGAGGUUCAUUGGGUUCCAUAGAGCUGCAUGGGUUACAUCUCUGGACGUCACGUGUGAGGGCAGAUGCUCAGUGCACAGAAGAGU	--	--	0	0	0	0.0410414	0	0
gga-miR-211	--	TTCCCTTTGTCATCCTATGCCT	--	28	+	2326316	2326389	CCUGUGAGCUUCCCUUUGUCAUCCUAUGCCUGAGCGAUGCCUGGAGGCUGGGACGGUGAAGGGAGGCCCACGGG	--	--	41.8364	39.9648	40.2524	42.1495	47.6766	50.048
gga-miR-219a	--	TGATTGTCCAAACGCAATTCT	--	17	+	5319586	5319670	CUCUGCUCCUGAUUGUCCAAACGCAAUUCUUGUGCGCUGGAGCCGUACGAACCAAGAAUUGUGUCUGGACAUCUGUAGCAGAGAU	--	--	0.140548	0	0.089054	0.0820828	0	0.0439018
gga-miR-1775-3p	--	TCCTGTAGCCAGAAGATTCTGA	--	5	+	2676870	2676958	GUGUAUGAGCUCUGAAUGCUUCGUGCAACAGGAAGACAAACAGGCUAAGCGAGUCCUUCCUGUAGCCAGAAGAUUCUGAUCUCUGACAC	--	--	0.0936986	0	0.044527	0	0.0878022	0
gga-miR-6547-5p	--	GTGGGATGTGGGGACGGGGTGA	--	27	+	7052795	7052914	CGAGUACCACGCCGACGGGGGCAAGGUGGGAUGUGGGGACGGGGUGACGGGGAGCGCGGUGUCCCCAUAGGGUCCCACUCACCCCUCCAUCCACCCACUCAGGUCCCCAUCAAGUGGAUG	--	--	0	0	0.044527	0	0.0878022	0.0439018
gga-let-7a-3p	--	CTATACAATCTACTGTCTTTCC	--	1	+	71198827	71198902	GGGUGAGGUAGUAGGUUGUAUAGUUUUAGGGUUAUGCCCUGCCUGUCAGAUAACUAUACAAUCUACUGUCUUUCCU	--	--	81.3304	88.9507	62.4714	76.0908	77.7488	76.6964
gga-miR-1753	--	GTGAAATCCGGGTGAAGGCTGT	--	17	+	6257860	6257938	GCUGGGGGCUUCUGUGAAAUCCGGGUGAAGGCUGUGCUCCACUCUGCAGCUUUUACCUGGAGGUCACCGCGGCUCCGGC	--	--	0	0	0	0	0.0439011	0.0439018
gga-miR-21-5p	--	TAGCTTATCAGACTGATGTTGA	--	19	+	7513411	7513507	UGUACCAUCCUGUCGGAUAGCUUAUCAGACUGAUGUUGACUGUUGGAUCUCAUGGCAACAACAGUCGGUAGGCUGUCUGACAUUUUGGUAUCUCUCA	--	--	37981.4	42375.2	32404.1	41765.2	40584.3	37766.1
gga-miR-34b-5p	--	CAGGCAGTGTAGTTAGCTGATTG	--	24	+	5568839	5568922	GUGCUUGGUUUGCAGGCAGUGUAGUUAGCUGAUUGUACCCAGCGCCCCACAAUCACUAAAUUCACUGCCAUCAAAACAAGGCAC	--	--	26.1419	26.53	27.2505	28.5238	27.1309	34.1117
gga-miR-99a-5p	--	AACCCGTAGATCCGATCTTGTG	--	1	+	100395008	100395088	CCAAUUGGCAUAAACCCGUAGAUCCGAUCUUGUGUUGAAAUGCACUGCACAAGCUCGCUUCUAUGGGUCUGUGUCAGUAUG	--	--	7675.89	7572.45	8099.68	8378.03	8120.82	8801.25
gga-miR-425-5p	--	AATGACACGATCACTCCCGCTGA	--	12	+	12045651	12045713	AAUGACACGAUCACUCCCGCUGAGCGCGCAGCCACAGAGCCAUCGGGGAUGUCGUGUCUGUCC	--	--	718.013	675.569	522.925	597.153	633.098	771.793
gga-miR-1665	--	TAAGGCCCAGGAGCGCTGCAGC	--	8	+	20091882	20091959	GAUACGAGGUAAGGCCCAGGAGCGCUGCAGCAGGGAUGCUGACAGCUGGAGUGUCUCAGGGCCUUGCUUUCAAGUGUU	--	--	0.70274	0.291006	0.356216	0.328331	0.175604	1.22925
gga-miR-6563-3p	--	ACTGGGCACACTGTGACTGGCTAC	--	3	+	16477231	16477340	AGCUACUGACUGCUGCAUCAGUUGGUCGGUUGUGCUUAGAGAUGUUUAUUUUCAUGUCCCACUGGGCACACUGUGACUGGCUACAUGCAGCACUCAGUUACUUCAGCUCC	--	--	0.140548	0.0970019	0.222635	0.164166	0.175604	0.0878035
gga-miR-6547-3p	--	ACCCCTCCATCCACCCACTCA	--	27	+	7052795	7052914	CGAGUACCACGCCGACGGGGGCAAGGUGGGAUGUGGGGACGGGGUGACGGGGAGCGCGGUGUCCCCAUAGGGUCCCACUCACCCCUCCAUCCACCCACUCAGGUCCCCAUCAAGUGGAUG	--	--	0.0936986	0.0485009	0.044527	0	0.0439011	0.131705
gga-miR-204	--	TTCCCTTTGTCATCCTATGCCT	--	10	+	6140962	6141062	CUACUGAGACUGUGUGACCUGUGGGCUUCCCUUUGUCAUCCUAUGCCUGGAGAUCACAGUGAGGCAGGGACAGCAAAGGGAUGCUCAGCUGUCGUCUCUUC	--	--	41.8833	39.8193	39.7626	41.657	47.2815	49.2578
gga-miR-6682-3p	--	TGGAACAAAGTAGGTGGCGTGC	--	4	+	21450116	21450225	ACACACCUGUGCUUUAGUGGUGGCUUGCCACCUAGGAUGAGCCAUAUGUUUAUAUAAAUGUUAUGGAACAAAGUAGGUGGCGUGCCACAGCAGAGAGCUAGGCGUGUCAU	--	--	0	0	0.044527	0	0	0
gga-miR-1617	--	AGAGGCCTTCAGATACTGTTTT	--	5	+	28533211	28533299	CCCAACAGCUAGCACUCAGCAGUUCUAAGGCAGCUGAUUUCUCCUUGUGUUUCAGAGGCCUUCAGAUACUGUUUUGUGGCUGGCAUGGG	--	--	0	0	0	0	0.0878022	0.0439018
gga-miR-125b-5p	--	TCCCTGAGACCCTAACTTGTGA	--	1	+	100428097	100428186	AUCAGACUUUUCCUAGUCCCUGAGACCCUAACUUGUGAGGUUUUGUAGCAACAAUCACAAGUCAGGCUCUUGGGACCUAGGCGGAGGGGA	--	--	711.173	712.964	793.738	797.476	712.207	681.443
gga-miR-365-2-5p	--	GAGGGACTTTCAGGGGCAGCTGT	--	18	+	6430634	6430729	GGCAGCAAGAAAAAUGAGGGACUUUCAGGGGCAGCUGUGUUUUACUAACCCAGUCAUAAUGCCCCUAAAAAUCCUUAUUGUUCUUGCAAUGGUCAA	--	--	17.1	17.8483	15.9407	16.9501	17.1653	20.0192
gga-miR-1764-5p	--	GCTCAGGCAGCAGGAGGCTTG	--	15	+	6080593	6080695	ACCUGCUUGGCGUUCCAUGGUGGCUCAGGCAGCAGGAGGCUUGUGAGAUGCUGGCGUUCAAGCUGCUUGUUGGCUGGGGAGCUGUGGAUGUGGACAACUAGGU	--	--	0	0	0	0.0410414	0.0439011	0
gga-miR-12280-3p	--	CCAGGCTGTAAGGGAACTTGGC	--	6	+	5451362	5451413	CCAAGUUCCCUUACAGCCCUGCGGUAACCGCCAGGCUGUAAGGGAACUUGGC	--	--	0.515343	0.291006	0.489797	0.369373	0.131703	0
gga-miR-1655-5p	--	TCAGCTGGTCTTGGGTAAATGC	--	8	+	7875904	7876006	GGGGAAACGUGUUUCAACACUGUGUCAGCUGGUCUUGGGUAAAUGCUAUUGUUCCUGCAGUAUUUACCCAUGGUGGGCUGAUACAGUGCUGGAGCACAGCCUC	--	--	1.03069	0.679013	0.356216	0.697704	0.658516	0.307312
gga-miR-184-5p	--	CCTTATCACTTTTCCAGCCCAGC	--	10	+	20409572	20409645	CCGCUCUCACCCCCUUAUCACUUUUCCAGCCCAGCUUCUUCGCUCUGACUGUUGGACGGAGAACUGAUAAGGGU	--	--	0.187397	0.0970019	0.178108	0.123124	0.482912	0.307312
gga-miR-12226-3p	--	CGGCCCGCCGCGGCCCTCACGCC	--	15	+	1038617	1038678	GUGAGGCGGCGGUCGGGACGCGCGGCAUCUCCGCCCCGCGGCCCGCCGCGGCCCUCACGCCU	--	--	0.234247	0.291006	0.178108	0.0820828	0.351209	0.0439018
gga-miR-12266-5p	--	GCCCCCATCGATTTGCTCTAC	--	30	+	828734	828791	GCCCCCAUCGAUUUGCUCUACGAACUGAUGAAGCAGAAGGGCAAACCCGAUGGGCACC	--	--	0.327945	0.242505	0.178108	0.205207	0.307308	0.175607
gga-miR-6685-3p	--	TGGTGACGCGGGCATTGCTGC	--	5	+	25254927	25255026	CAUCAGCGCUGUACCCGAGCCAGCAAUGCACGUGUACUCAGAGACGGAAUUCCUGGUGACGCGGGCAUUGCUGCUUGGUUCAGGUCAUUGCACACACACA	--	--	0.140548	0.145503	0.133581	0.164166	0.482912	0.0439018
gga-miR-218-3p	--	CATGGTTCTGTCAAGCACCATG	--	13	+	5314120	5314214	GGGGUUUUCCUUUGUGCUUGAUCUAACCAUGUGGUAGAACAAUACAAAUUGAACAUGGUUCUGUCAAGCACCAUGGAAGGCUGCAUACUCCCUGC	--	--	0	0.0485009	0	0	0	0.0878035
gga-miR-1626-3p	--	TCTGGAAGTTGCCCTGGACGTG	--	1	+	6229359	6229448	AGUGUGUUGAUGCCAUUUCCAUGGCAGACUUUCUAGGCUGAAGAUUUCUGAAAUCUCUGGAAGUUGCCCUGGACGUGGUAUUCAAUGCCU	--	--	1.07753	1.16402	0.89054	0.697704	0.79022	0.921937
gga-miR-1554	--	GCAGGTGATGAGGCTTTGCTG	--	14	+	6193367	6193445	UGUGUGACUUGUGGGCAGGUGAUGAGGCUUUGCUGCUGCAGUAUUCCAGCAUUGGCUGGCACAUCUGAUUGCUAACAUA	--	--	0.0936986	0	0	0	0	0
gga-miR-29a-5p	--	CTGATTTCTTTTGGTGTTCAGA	--	1	+	4030403	4030491	ACCCCUUUAGAGGAUGACUGAUUUCUUUUGGUGUUCAGAGUCAAUAAUAUUUUCUAGCACCAUUUGAAAUCGGUUAUAGUGAUUGGGGA	--	--	0.187397	0.0485009	0.133581	0	0.263407	0.131705
gga-miR-1329-3p	--	CCTCGTAGCTTGATCACGATAT	--	3	+	96917352	96917446	UCUUGGUCUGGUUGUAGAGAUACAGUGAUCACGUUACGAUGGAUUUCUCAAGUAACAACCUCGUAGCUUGAUCACGAUAUCCCUAUGACUUGAGA	--	--	0.749589	1.26102	1.46939	1.55957	1.27313	1.00974
gga-miR-1767	--	AGGCGAGGAGAACAGCAGCT	--	3	+	42979566	42979624	GGCUGGCUGCUGGGCCGCUUCUUUCCUCGGGUAGAGGCGAGGAGAACAGCAGCUGAGCU	--	--	0	0	0.044527	0	0	0
gga-miR-1724	--	TGCTGAGCGTTGGCTGCGCTGCG	--	23	+	2914834	2914935	UGUUCGUGCUGUGCACCGCGGGGUGCUGAGCGUUGGCUGCGCUGCGUCCCCAACAGCAACCCGGCUCCGCUCAGGUCCUGCCUUGCGCCGCGUCCUGGAACA	--	--	0.140548	0.339506	0.222635	0.410414	0.263407	0.131705
gga-miR-7463-3p	--	ATTACTTTCAATGGGACTAAGT	--	3	+	1064693	1064754	UGAGUCUCCUUGAAAGUAAUGGCAUGUGAUUGCUUACCCCAUUACUUUCAAUGGGACUAAGU	--	--	0	0	0.044527	0.0820828	0.131703	0.0878035
gga-miR-6651-5p	--	ACCAGGTTGCCTAAGGAGGGG	--	Z	+	48769802	48769911	AGCCCCGGUGAGCCGAGGCACACCAGGUUGCCUAAGGAGGGGGUGCCAGCCCAUGGUCAGCUAACUGGUACCUGCUCCUGGUUCUUGGCGAGGGUACGCCUCCAGACCCG	--	--	0	0.0485009	0.044527	0.0820828	0	0
gga-miR-7451-3p	--	TTGCTTCTTCTTATCCCACAGT	--	1	+	67156142	67156196	CGUGGGAAUUAAGAGUGGCAGUCUGUUACAUGAUUGCUUCUUCUUAUCCCACAGU	--	--	0.0936986	0.0485009	0.400743	0.164166	0.307308	0.307312
gga-miR-9-3p	--	TAAAGCTAGAGAACCGAATGT	--	28	+	3708388	3708475	UUGGGUUGGUUUUUCUCUUUGGUUAUCUAGCUGUAUGAGUGUAUGUGAUAUCAUAAAGCUAGAGAACCGAAUGUAAAAACCCGCUCGC	--	--	22.3003	16.4903	14.4713	26.2255	23.2676	30.9068
gga-miR-1769-5p	--	CTTCAGGCTTTTCTCACACCTG	--	15	+	2528864	2528966	GUGUGGAUGUGUGUGGUGUGGCCUUCAGGCUUUUCUCACACCUGUUGAGCUCUGCAGUCAAGUGUGAAAUCUGCCUGAAAGUCAUUCCAACAUUCAAAUAUGC	--	--	0.70274	0.145503	0.222635	0.615621	0.570714	0.439018
gga-miR-12258-3p	--	GGAGGAGGACGCAGCCATGTGC	--	28	+	4004631	4004697	UGCACGGCUGCAGCCUCCUCACCCAUAUCCCAAGGAGAAGCAGGGGAGGAGGACGCAGCCAUGUGCU	--	--	0.0936986	0.0485009	0.089054	0.205207	0.0878022	0.0439018
gga-miR-222a	--	AGCTACATCTGGCTACTGGGTCTC	--	1	+	111966534	111966631	UGUAGUUGCCCAUCAAUCGCUCAGUAGUCAGUGUAGAUUCUGUCUUUACAAUCAGCAGCUACAUCUGGCUACUGGGUCUCUGAUGACAUCUCAUAUCU	--	--	1094.12	1106.74	988.588	1012.86	1035.8	1324.43
gga-miR-1768	--	GAGCAGAGGATTGTCGTGCTGA	--	2	+	14144523	14144599	UAUCAGCUCAUCAGCAUGACAAUCCUCUGCUGCCUUGGGAGUUGUGAGCAGAGGAUUGUCGUGCUGAUGAGUUGAUA	--	--	0	0	0	0	0.0439011	0
gga-miR-1784-5p	--	TTCTGCTCTTATTGAAATCAGT	--	3	+	35727094	35727196	UGGACCAAUUUCUUGGGGCCCAAUUCUGCUCUUAUUGAAAUCAGUGAGAGUUCUGCCAUUGACUUAAAUAGGAGCAGAAUUGGGACCUAAGAAGAGAUUUCCA	--	--	0	0	0	0	0	0.0439018
gga-miR-1714	--	CCTAGTAGGGCTGCTGAGGTGAT	--	2	+	114304737	114304812	UGCUGCUUGCCUAGUAGGGCUGCUGAGGUGAUCUAGGGCAUCACUGUCACCUAUGGUCCUCCUACUGAAAGAAGCA	--	--	0.0468493	0	0	0	0	0
gga-miR-1c	--	TGGAATGGAAAGCAGTATGTAT	--	7	+	34994775	34994848	GGCUCAGUGGCUGGAAUGGAAAGCAGUAUGUAUUUUAUGUAAAAUAGAUUUGCAUUAUUAUUUAUUCAUGAGCU	--	--	0.234247	0.339506	1.24676	0.410414	0.614615	0.219509
gga-miR-6582-3p	--	CACTCTGGGTGTTTCTCTTGCAG	--	3	+	57371166	57371270	UCAGUGUUGUUGCAUCCUGUUAGAGAGACACUCAUAGAGAGUCUUUUCACAGUAACUCACUCUGGGUGUUUCUCUUGCAGAAAACUGAGGUAAUAGAAGAAGCUU	--	--	4.77863	5.62611	4.71986	2.54457	1.62434	3.33653
gga-miR-1644	--	TCTGTTGTGCAGGGCTGTGCT	--	14	+	8536547	8536632	GUGUCCCCAGGUAGCGCUGAGCCCAGCAGGCAGUGCUGUGCCAAUCUGGCUGCUCUGUUGUGCAGGGCUGUGCUCCCAGGGUGUGC	--	--	0.327945	0.388007	0.489797	0.328331	0.834121	0.614625
gga-miR-1452	--	TTGAGATAAGACAGAGGATATT	--	Z	+	66646483	66646560	AGGGACUGUCUUGAGAUAAGACAGAGGAUAUUAAGCCUGAAAUAAAAAUAAUAUCCUUCUUUCUUGUCUUUUAGUCUC	--	--	0.0936986	0.242505	0.133581	0.205207	0.0878022	0.175607
gga-miR-6566-5p	--	GAGGCCCGATGTGTCATTCCT	--	16	+	1900139	1900242	GAGCCGUCUUUGUCCGAGAAGCGGUUGAGGCCCGAUGUGUCAUUCCUGGAUUUUCUCUGUCAUCCAGCAGGCCAUGGGGUCGCAGCUGCUCCGGACGUUCUGCA	--	--	0.983836	0.679013	0.534324	0.697704	0.834121	1.05364
gga-miR-223	--	TGTCAGTTTGTCAAATACCCC	--	4	+	264965	265064	CUGCAGUGCAGCACUGCGUGUAUUUGACAAGCUGAGUUUGACACUCAGUCUGGCAGAGUGUCAGUUUGUCAAAUACCCCAAGUGAGGCACUUGCUGAGCA	--	--	143.921	141.332	108.779	111.469	116.601	101.545
gga-miR-12233-3p	--	AGTCCGTGCCCCCCCGGTTCCC	--	19	+	4316423	4316484	GAGGGAACCGGUGGGGGGCACGGACUCCCCGUACGGGGAGUCCGUGCCCCCCCGGUUCCCUC	--	--	0.0936986	0	0.044527	0	0	0
gga-miR-6666-3p	--	TCGGGTGATGAGGACAGGAGGA	--	28	+	4808663	4808772	GAGAGAACGGGAAUUUAGGGGACUCCUGCACUCGUUCGUCCCUGCGCUGUGAUGCAGUCUGCUCGGGUGAUGAGGACAGGAGGAUUCCUGAGUUUGUUCUUCCCAGCUAU	--	--	0	0.0970019	0.222635	0.164166	0.0439011	0.131705
gga-miR-1593	--	ACCATCTGATTTGGACACGCA	--	1	+	59562440	59562529	CAUGACUUGAGUGGAACACCAUCUGAUUUGGACACGCAUGAUGUGCUACAGGUGCGUGUAAAAUCAGUGUGUAUCCCACUCCUUGCCAUG	--	--	0	0	0	0.123124	0	0.131705
gga-miR-7469-3p	--	TTTGTGTGCTTGCATTGCAAAGG	--	4	+	18082789	18082855	UUUGCAAUGCAAUUUUACAGUAGACCUUAGAAGUGAGGACAGUCUUUGUGUGCUUGCAUUGCAAAGG	--	--	0	0	0.044527	0	0	0
gga-miR-302d	--	TAAGTGCTTCCATGTTTTAGTTG	--	4	+	57085079	57085147	CCUCAACUUUAACAUGGAGGUACUUGCUGGACACCUGAAAAAGUAAGUGCUUCCAUGUUUUAGUUGUGG	--	--	2.38932	3.05556	6.58999	3.28331	22.7847	6.98038
gga-miR-137-5p	--	ACGGGTATTCTTGGGTGGATAATA	--	8	+	12923059	12923154	UCUGACUCUCUUCGGUGACGGGUAUUCUUGGGUGGAUAAUACGGAUUACGUUGUUAUUGCUUAAGAAUACGCGUAGUCGAGGAGAGUACCGGCGGC	--	--	0	0	0	0	0	0.0439018
gga-miR-1685-5p	--	TGGAGTCACTACCAGTGCTGTG	--	2	+	24783225	24783319	GUUUUUUAGUGGCACAGUUGGAGUCACUACCAGUGCUGUGUUUGACUACGUAUGUAACCACAGUAAUGGUAUGAACUCAGAUGUGCUACAGAAAU	--	--	0.187397	0.194004	0.222635	0.328331	0.219505	0.263411
gga-miR-6565-3p	--	TCTGTGCTTGTGTACTCATAG	--	Z	+	55589725	55589825	CUAGUCUGUAUUCCUUAAAAUGAGAUAGCAAAGCACACUUCAGUGUAUGAAUUGAUCUGUGCUUGUGUACUCAUAGGCUUUUGGACACCUGGAAGAUGUUU	--	--	1.73342	1.79453	3.11689	2.42144	2.28286	2.4585
gga-miR-1630	--	AAAGAGGAAACTGAAGCTGAAA	--	9	+	909477	909533	UUUGGGCUUUUGUUUCUUCUUUCUAAAGGGGGAGGAAAGAGGAAACUGAAGCUGAAA	--	--	0	0	0	0	0	0.0439018
gga-miR-6621-5p	--	ACAGGGATTACAGGGCTCTGA	--	1	+	3308960	3309069	UCACCACAUAGGUUAUGAGCACAGGGAUUACAGGGCUCUGAGGACUCUGCAGAGCAGCAUUCAGUGUCCCUGUUCUCCUUGCAGAGUGGCGGCAGGCAAGUGGGGCAAGG	--	--	0	0	0	0.0410414	0	0
gga-miR-12279-5p	--	TGCGGGCGGGGGCAGCGCGGCGG	--	5	+	14338471	14338530	UGCGGGCGGGGGCAGCGCGGCGGUCUGGCAACUCUCCCCGCAGCGCUCCCCCCCCACCCC	--	--	0	0.0485009	0	0	0.0439011	0
gga-miR-103-1-5p	--	TCGGCTTCTTTACAGTGCTGCCTTG	--	13	+	5440006	5440083	UGCUGCCUUCGGCUUCUUUACAGUGCUGCCUUGUUGCAUAUGGAUCAAGCAGCAUUGUACAGGGCUAUGAAGGCACUG	--	--	0	0.0485009	0.356216	0.0410414	0.175604	0.175607
gga-miR-205a	--	TCCTTCATTCCACCGGAGTCTG	--	26	+	3076425	3076520	GACAAUCCAUGGGUUCUGUUGUCCUUCAUUCCACCGGAGUCUGUCUCGUACCUAACCAGAUUUCAGUGGAGUGAAGCACAAGAGACAUGGAGAUGA	--	--	2561.39	3007.01	4585.12	2943.04	2864.81	2977.77
gga-miR-338-3p	--	TCCAGCATCAGTGATTTTGTTGA	--	18	+	9290657	9290741	GCUCCUCCUGCCCAACAAUAUCCUGGUGCUGAGUGAGUUGCACACAGAGACUCCAGCAUCAGUGAUUUUGUUGAGGAAGGGGAGC	--	--	4.02904	2.57055	3.295	3.5706	3.29258	3.73165
gga-miR-12259-5p	--	TGCAGGTAGGCAGGGGGAGCAGG	--	3	+	30385461	30385529	GUGCAGGUAGGCAGGGGGAGCAGGCUGUGUGCUGGUUGCCUACCGUCUGCCUCUUUGUCUAUCUGCAGA	--	--	0	0	0	0	0	0.0439018
gga-miR-1749-5p	--	AGATAAGGAACTGAACTGGCT	--	2	+	633512	633609	GAGUGCAGCUGGAGGGCUACAGGGAGAUAAGGAACUGAACUGGCUGCAUCUCUGCUGCUUGGCUCUGUUCCCUAUUUCCCGUCUCCUUAGCAAAUCUC	--	--	0.0468493	0	0	0	0	0
gga-miR-365-1-5p	--	GAGGGACTTTTGGGGGCAGATGT	--	14	+	1172367	1172451	CGCAGGGAAAAUGAGGGACUUUUGGGGGCAGAUGUGUUUCCAUUACACUAUCAUAAUGCCCCUAAAAAUCCUUAUUGCUCUUGCA	--	--	5.85616	6.30512	4.14101	5.45851	6.62906	7.4633
gga-miR-10a-5p	--	TACCCTGTAGATCCGAATTTGT	--	27	+	6242489	6242562	CUAUAUGUACCCUGUAGAUCCGAAUUUGUGUAAAGGAAGUUGGGUCACAAAUUCGUAUCUAGGGGAAUAUGUAG	--	--	23783.3	24512.8	29431.2	23072.7	25753.5	23783.3
gga-miR-187-3p	--	TCGTGTCTTGTGTTGCAGCC	--	2	+	83611938	83612023	AAACUAUUGUGAGACCUCCGGCUACAACACAGGACAUGGGAGCUUUUCUGAACCCUCGUGUCUUGUGUUGCAGCCAGAGGGGCACA	--	--	44.1789	60.7232	127.881	77.6504	73.7977	55.7992
gga-miR-726-3p	--	TTCACCACCGGCAGAACTCGG	--	KZ626833.1	+	219368	219425	GGAAUUCCGCCCGUUCUGAGCUCUGGAGGCGCUGAGUUCACCACCGGCAGAACUCGGC	--	--	0.562192	1.11552	0.801486	1.92895	2.28286	1.75607
gga-miR-27b-3p	--	TTCACAGTGGCTAAGTTCTGC	--	Z	+	41660862	41660958	ACCUCUCUGGUGAGGUGCAGAGCUUAGCUGAUUGGUGAACAGUGAUUGUUUCCCUCUUUGUUCACAGUGGCUAAGUUCUGCACCUGAAGAGAAGGUG	--	--	4976.33	5132.51	4258.03	7396.53	5802.93	5726.63
gga-miR-7462-5p	--	CAACCTCATTTCTAGCTTCTGG	--	3	+	54227861	54227921	CAACCUCAUUUCUAGCUUCUGGAGUGCCACUUGAAGCCUGGAAGCUUGAAAUAAGGUUGAA	--	--	0.327945	0	0.133581	0.123124	0.263407	0.0878035
gga-miR-6642-5p	--	TTCCCCGACGGCCGAGCGGGCC	--	5	+	13870257	13870357	ACACGACGCCGCCGCCGCGUUCCCCGACGGCCGAGCGGGCCGCUCCGCGGGGCGGGCGGCCGUCGGGGAAAGCGGAGGCGGUAGCGGCUAUUCCUCCGCCU	--	--	0.140548	0	0.178108	0.0410414	0.131703	0.0878035
gga-miR-12216-5p	--	GGCGGGGGCGCGGGGTGCTGA	--	10	+	1784374	1784461	CGGGCGGGGGCGCGGGGUGCUGAGCCGUCCUUUGGGGUCUCUCCCCGCGUGGGCCUCCCCCCGCUCAGCACCCCUCCGUCCCCGCAGU	--	--	0	0.0485009	0	0.0410414	0	0
gga-miR-1776	--	TGTAGTGATAAGGAGACTGTCT	--	4	+	43596110	43596210	UGGUAUAUUGUUACUGCUUUAUCUGUAGUGAUAAGGAGACUGUCUUCCUGCAGCAAGUAGAUAGUUGCCUUAUCAUUAUAGCUAAAGUAAAACUCUUGCCA	--	--	0	0.0485009	0.178108	0	0.570714	0
gga-miR-1551-5p	--	CTAGCAGCAAAAAGAACTTCAGA	--	14	+	5612805	5612894	AGGAGUUACUAUAGCUAGCAGCAAAAAGAACUUCAGAUGUGAUUAACUUGGAGCUCUGAGUUUGUGUUGCUGCUUUCUUAGUGCUCUCUU	--	--	16.6315	10.5247	13.0019	0.697704	0.834121	3.95116
gga-miR-1553-5p	--	AGTCCTGTCCTGTCTACCTACTGT	--	7	+	23744568	23744672	GAGGACCAGUUGGCAGCUCUCACACAGUCCUGUCCUGUCUACCUACUGUCUGUCCUGUCCUGUGGUGGGAGGACAGUGAUGUGGGAGAGGGCCACUUUCAGCUUU	--	--	1.45233	0.921518	1.02412	1.43645	1.66824	1.49266
gga-miR-146b-5p	--	TGAGAACTGAATTCCATAGGCG	--	6	+	24096323	24096427	GGACUGGCUGCUUGGCUUUGAGAACUGAAUUCCAUAGGCGUUAAAGCAUCCAAAAAUGCCCUAUGGAUUCAGUUCUGCAGUUGGGCAGCAAAUAAACCUCCAGCC	--	--	4440.14	4117.05	3013.23	3359.2	3369.5	4366.12
gga-miR-1550-3p	--	CTTCACTTACACTGCTCACTGGT	--	12	+	13251444	13251541	CCAGACCUGUGCAGGCUUGGGCUGAUGGGGGUGUAGUGCAGCAGCUAUUUAUCAUGCUUCACUUACACUGCUCACUGGUCUAAGCUGCACCACCCGGG	--	--	0	0.0970019	0.089054	0	0.175604	0.219509
gga-miR-302b-3p	--	TAAGTGCTTCCATGTTTTAGTAG	--	4	+	57084179	57084250	CCCUUUUACUUUAACAUGGAGGUGCUUUCUGUGAUUUUACAAAAGUAAGUGCUUCCAUGUUUUAGUAGAGGU	--	--	2.43616	2.52205	4.4527	2.54457	22.1261	6.40966
gga-miR-193a-3p	--	AACTGGCCTACAAAGTCCCAGT	--	18	+	6417109	6417185	AGCUGAGGGCUGGGUCUUUGCGGGCGAGAUGAGAGGUUCGUGUCUUCAACUGGCCUACAAAGUCCCAGUUCUCGGCU	--	--	1.59288	1.16402	1.91466	1.6827	1.27313	1.27315
gga-miR-12250-3p	--	CGTGCTCTGCTCTCTCCCCAG	--	24	+	5139058	5139119	GCAGGGGAUGGAGCCGAGUGCCACAGCUGACCCCACACCACGUGCUCUGCUCUCUCCCCAGC	--	--	0	0.0485009	0.044527	0	0	0
gga-miR-6696-5p	--	AGCTGTGATCTCAAGCCCCCAC	--	17	+	5062654	5062756	UCAUUCUGCUGAAGCGAGUAGCUGUGAUCUCAAGCCCCCACAGGCAGCUCAGAGUGGGAGACUUGCCUGAUAACAGCUGCAUGCAAAGCAAGAUUGUCUGCAU	--	--	0	0	0.044527	0	0.0878022	0
gga-miR-1562-3p	--	TGTGCCCCGTGTATGCAGTGCA	--	8	+	24516519	24516620	AUCAACAAGCGGGGUGCAGCUGCACUGUAGAUGGAGGGGCUGCAUGAAGGUGGAUAGUUUCUGUGCCCCGUGUAUGCAGUGCAGGUGCUCACUGCACUUGGU	--	--	0	0	0.044527	0	0	0
gga-miR-26a-5p	--	TTCAAGTAATCCAGGATAGGC	--	2	+	4629095	4629171	GUCACCUGGUUCAAGUAAUCCAGGAUAGGCUGUAUCCAUUCCUGCUGGCCUAUUCUUGGUUACUUGCACUGGGAGGC	--	--	30332.1	33358.9	30989.4	34264.6	32921.2	31101.9
gga-miR-6648-5p	--	AGGAGCGTTCAGAATGCCGGTG	--	15	+	6946790	6946888	GCGGAGGCUACGGGGGUAAAGGAGCGUUCAGAAUGCCGGUGGCAGCUGCCCUCCGGCAUUCUGAACGCUCCUUUACGCAGGGUGAUUGGGGCUGGUGAG	--	--	0	0	0.044527	0	0	0
gga-miR-193b-5p	--	CGGGGTTTTGGGGGCGAGATGA	--	14	+	1167549	1167631	GUGGUUCCAGAGUCGGGGUUUUGGGGGCGAGAUGAGCUUAUGUUUUAUCCAACUGGCCCACAAAGUCCCGCUUUUGGUGGUCA	--	--	0.749589	0.53351	0.356216	0.738746	0.658516	0.702428
gga-miR-1783	--	TGCTCTGAACGAGCTGAGAGGCA	--	12	+	9206078	9206178	CUGAAGUGUUAUGAAAUCGUGCUCUGAACGAGCUGAGAGGCAUGCUACUUUCUGAUCAUUGCAUCCAGCUCUCUCAUUGCUCAUUUCAUAACUCCUUUCAG	--	--	0	0.0970019	0.044527	0.28729	0.39511	0.0878035
gga-miR-23b-3p	--	ATCACATTGCCAGGGATTACC	--	Z	+	41660626	41660711	UGUUGUGGCUGUUUGGGUUCCUGGCAUGAUGAUUUGUGAGUUAAGAUUAAAAUCACAUUGCCAGGGAUUACCACAUAGCCAUGACC	--	--	698.102	793.184	821.835	832.402	769.191	771.398
gga-miR-1609	--	AGGCTGAGGCTGTGCTGGTTGT	--	13	+	17546478	17546571	UGACCUGGGCAGCCAGUGAGGCUGAGGCUGUGCUGGUUGUCUUUGUGUCAGGUACAAGCUGCGCAGACCCACAGGCACUGGCUGCCUUAAAUCA	--	--	0.0936986	0.242505	0.489797	0.369373	0.482912	0.263411
gga-miR-196-1-3p	--	CAAGAACATCAAACTACCTGAT	--	27	+	6183421	6183515	UGAACUAGAACUGCUCUGUGAAUUAGGUAGUUUCAUGUUGUUGGGCUUUAAAUUUUAAACACAAGAACAUCAAACUACCUGAUUUACUCCAGUUA	--	--	4.07589	4.17108	4.14101	3.77581	5.00472	3.86336
gga-miR-216c	--	ATCTCTACAGGTAATTGTGAGA	--	3	+	350629	350714	UGCCAGAUUGUAGAAUCUCUACAGGUAAUUGUGAGAUUGCUAUAAAGACAUCACAUUUGCCUGCAGAGAUUUCCCAGUCUGUGACU	--	--	0	0	0.044527	0.0410414	0	0
gga-miR-218-5p	--	TTGTGCTTGATCTAACCATGT	--	13	+	5314120	5314214	GGGGUUUUCCUUUGUGCUUGAUCUAACCAUGUGGUAGAACAAUACAAAUUGAACAUGGUUCUGUCAAGCACCAUGGAAGGCUGCAUACUCCCUGC	--	--	5194.98	5252.41	4460.8	5152.96	5038.26	4757.85
gga-miR-1727	--	AAGCTGCTCTAATGAACTGAAGG	--	1	+	71469536	71469641	GGACAGACUUAGAUCAGCAGGAAAAGCUGCUCUAAUGAACUGAAGGUUUUGACAGCCAGCCUAGUGUUCAUAUGAACAGCUAUUUCUUGUUGCUGAGAAAACUGCC	--	--	1.73342	2.27954	1.02412	1.39541	1.22923	2.28289
gga-miR-124a-3p	--	TTAAGGCACGCGGTGAATGCCA	--	20	+	8692479	8692576	CCGAGCCUCUCUCUGCGUGUUCACAGCGGACCUUGAUUUAAUGUCCAUACAAUUAAGGCACGCGGUGAAUGCCAAGAGAGGAGCCUCACAGCUUCAUU	--	--	0.281096	0.242505	0.133581	0.451456	0.482912	0.482919
gga-miR-12277-5p	--	GGACGGGGCTGGGATCCAGGA	--	5	+	348189	348255	GGACGGGGCUGGGAUCCAGGACCUGCUGCGGGCAUUGGAAGUGUUUUGGGUGCCAGCCCCGUUGCGG	--	--	0.0936986	0.0485009	0.178108	0.0820828	0.219505	0.0878035
gga-miR-1751-5p	--	TGAGCTGCTCTGTTCCTGCATCC	--	4	+	50089448	50089537	CGGCUACAGCAAAGUGAGCUGCUCUGUUCCUGCAUCCCACAGGAAGCAGUUUGGGAUGAAGGACGAGGGCAGACCGCGUUGCUUGUGCCG	--	--	0.0936986	0.0970019	0.089054	0.123124	0.351209	0.131705
gga-miR-128-3p	--	TCACAGTGAACCGGTCTCTTT	--	2	+	45455218	45455301	UGUCCAGCUGGAAGGGGGGCCGUUACACUGUAAGAGAGUGAGUAGCAGGUCUCACAGUGAACCGGUCUCUUUUCCUGCUGUGUC	--	--	2054.58	2170.32	1981.76	2437.94	2396.03	2881.14
gga-miR-460b-3p	--	CACAGCGCATGCAATGTGGACAT	--	4	+	2699809	2699898	CUCAGAUCUGGCUCUACGUUGUCCUCAUUGUACAUGCUGUGUGUAUUUGCCACGUACACAGCGCAUGCAAUGUGGACAUAAUGGAGCUCA	--	--	0.70274	1.16402	2.27088	0.656663	0.39511	0.482919
gga-miR-103-3p	--	AGCAGCATTGTACAGGGCTATGA	--	13	+	5440006	5440083	UGCUGCCUUCGGCUUCUUUACAGUGCUGCCUUGUUGCAUAUGGAUCAAGCAGCAUUGUACAGGGCUAUGAAGGCACUG	--	--	2633.21	2702.81	2787.26	2248	2280.79	2416.4
gga-let-7a-5p	--	TGAGGTAGTAGGTTGTATAGTT	--	1	+	71198827	71198902	GGGUGAGGUAGUAGGUUGUAUAGUUUUAGGGUUAUGCCCUGCCUGUCAGAUAACUAUACAAUCUACUGUCUUUCCU	--	--	8136.32	8523.84	6021.25	8719	8665.68	9152.47
gga-miR-7442-3p	--	TCTGCTTCCTCCTCCTGCAGC	--	17	+	2812025	2812082	CACAGGACCAUGGGAGCGUGGCCACCUUGCCCUGAGCUCUGCUUCCUCCUCCUGCAGC	--	--	0	0.145503	0	0	0	0
gga-miR-1740-3p	--	TCATCCAATTAAACCACAAA	--	3	+	3796289	3796390	UGAUGUGGAAUUACCCUGAGUAAUGUAGUUUAAGAGGAUAGGUCUUAAGUUUUACAGUGUGAUCAUCCAAUUAAACCACAAAACUCAGGGAAAACUAAAGCA	--	--	0	0	0	0	0	0.0439018
gga-miR-12226-5p	--	GTGAGGCGGCGGTCGGGACGCG	--	15	+	1038617	1038678	GUGAGGCGGCGGUCGGGACGCGCGGCAUCUCCGCCCCGCGGCCCGCCGCGGCCCUCACGCCU	--	--	0.468493	1.01852	0.311689	0.492497	0.307308	0.702428
gga-miR-12276-3p	--	TGTAGAGAGTGGTGGGGTCTCT	--	4	+	90047707	90047765	CUGACCCCAACCUCGCUACCACCUCCUUUGAGGGAGUUGUAGAGAGUGGUGGGGUCUCU	--	--	0	0	0	0.0410414	0.0878022	0.0439018
gga-miR-1677-3p	--	TGACTTCAGTAGGAGCAGGATT	--	3	+	73971334	73971406	AGGGUCUGAUCCUGCACCGCUGAAGUCAAUGGAAGUUUUGUCAUUGACUUCAGUAGGAGCAGGAUUUGAACCU	--	--	312.063	336.063	289.871	323.16	315.473	336.112
gga-miR-1550-5p	--	TGATGGGGGTGTAGTGCAGCA	--	12	+	13251444	13251541	CCAGACCUGUGCAGGCUUGGGCUGAUGGGGGUGUAGUGCAGCAGCUAUUUAUCAUGCUUCACUUACACUGCUCACUGGUCUAAGCUGCACCACCCGGG	--	--	0.234247	0.242505	0.623378	0.451456	0.570714	0.263411
gga-miR-1608	--	TGGGACAGTGGCTGCGCCCTCT	--	9	+	5392189	5392281	UCUCAUCUGGUGCCCCCGGGAUGGGACAGUGGCUGCGCCCUCUGUGAAGGGAAUGGAGGGCUCAGCAGCUGUGCCCGUGCCUGGCAGAGUGGA	--	--	0	0	0	0.164166	0.0439011	0.131705
gga-miR-460a-3p	--	CACAGCGCATACAATGTGGATT	--	2	+	3746348	3746437	CUGACUAUAUAGCACCUGCAUUGUACACACUGUGUGUGUUAACUGGAAAUGCACAGCGCAUACAAUGUGGAUUCUGUAGAAGUCACUCAC	--	--	0.421644	0.388007	1.11317	0.28729	0.439011	0.482919
gga-miR-1738	--	ACTGACTGCTCAGAGGGATTGG	--	1	+	106098897	106098987	CACUGCUGGUGGACUGACUGCUCAGAGGGAUUGGGCUGCUGCAUGGUCCUGCCCUGUGCCCACUGGGAAGUCUGUGUCCAUUGCUGCAGUG	--	--	0	0.0970019	0.044527	0.0410414	0.0878022	0
gga-miR-6552-5p	--	GTCTGTCCAGGTCTTGTTGGA	--	5	+	45384999	45385102	CUCUCUGCCCAACUCUCCAGUCUGUCCAGGUCUUGUUGGAUGGCAGCACAGCCUUUCAACAAGAAGUGGACAGACUGGAGCGUUGCUUCAAGACUGACAAGAAA	--	--	0	0	0.044527	0	0	0.131705
gga-miR-12277-3p	--	TTTGGGTGCCAGCCCCGTTGCG	--	5	+	348189	348255	GGACGGGGCUGGGAUCCAGGACCUGCUGCGGGCAUUGGAAGUGUUUUGGGUGCCAGCCCCGUUGCGG	--	--	0.749589	1.30953	1.06865	1.31333	1.14143	0.878035
gga-miR-7449-5p	--	AGGTCATCTAGTCCAACTTCCC	--	2	+	127199774	127199804	AGGUCAUCUAGUCCAACUUCCCUGCAAUGAACAUGUACACAUACAGAGGGUUGGACGAGAUGGUCUUU	--	--	0.0468493	0	0	0	0	0.0439018
gga-miR-1306-3p	--	TGGACGTTGGCTCTGGTGGTGAT	--	15	+	1583108	1583176	UCCACCACCUCCCCUGCAAACGUCCAGUGACGCAGAGGUAAUGGACGUUGGCUCUGGUGGUGAUGGACA	--	--	29.234	28.373	25.8257	34.8852	32.4868	33.8922
gga-miR-129-1-3p	--	AAGCCCTTACCCCAAAAAGCAT	--	5	+	21753622	21753687	CUUUUUGCGGUCUGGGCUUGCUGUACAUAACUACCUACCCGGGAAGCCCUUACCCCAAAAAGCAUU	--	--	3.1389	2.37655	4.00743	3.32436	3.51209	2.06338
gga-miR-12236-3p	--	AGTGCAAATTATGAATAATGG	--	19	+	8203860	8203917	AUUGAUUCAUUCUUUGCUCUUCUAAUUAUAAGAGGAAGUGCAAAUUAUGAAUAAUGGA	--	--	0.983836	1.06702	0.623378	1.02604	0.965824	1.18535
gga-miR-1612	--	GAAGGAAAAGGAGCTGACTGGG	--	9	+	5151221	5151304	CUUUUAAGCAUCCAAUUGGCUCUUUUCUUUCUUUCUUUUUUUAUGGUAGAGGAAGGAAAAGGAGCUGACUGGGCAGCUUGGAGG	--	--	0.234247	0.291006	0	0.0820828	0.0878022	0.175607
gga-miR-1574-3p	--	ACAGGAGGATGTCAGGAAGCTT	--	10	+	6140689	6140762	CAGCCAAUGCUCUGUGACUUCUCCUUGUCAGAGCUGGGGUAUACUGACAGGAGGAUGUCAGGAAGCUUCUGCUG	--	--	0.374795	0.388007	0.44527	0.205207	0.131703	0.482919
gga-miR-365-3p	--	TAATGCCCCTAAAAATCCTTAT	--	18	+	6430634	6430729	GGCAGCAAGAAAAAUGAGGGACUUUCAGGGGCAGCUGUGUUUUACUAACCCAGUCAUAAUGCCCCUAAAAAUCCUUAUUGUUCUUGCAAUGGUCAA	--	--	64.371	50.4895	43.681	42.5189	44.8669	55.9309
gga-miR-6610-3p	--	TGGGTGGCTTTGGAGATATGGA	--	2	+	4966339	4966448	CAGCCCUGGCUCUCUCGCAUGUCUCCUUUCUGCAUCACAGUGCAAACACUGAGCACGAGCUGUGGGUGGCUUUGGAGAUAUGGAUGGUGCUUGGGCCUUGUGCGUAUGCA	--	--	0.0936986	0.0485009	0.089054	0	0	0.0439018
gga-miR-1662	--	TTGACATCATCATACTTGGGAT	--	2	+	1911587	1911659	UCUAUGGGUUUGACAUCAUCAUACUUGGGAUGUAUGACACAAAGUCCCAAGCAGGCUGAUGUCAGGCCCAAGA	--	--	1.31178	1.40653	1.78108	1.47749	2.19505	2.32679
gga-miR-1710	--	TCATCTGCTGCATAACCATCCA	--	5	+	28093442	28093521	AACCAGCUGCAAUUUCAUCUGCUGCAUAACCAUCCAGUAAUUAUGCAUGGCUCUGCUGGCAGAGGAAUGGCAGUGAGGUU	--	--	0.187397	0.0970019	0.133581	0.328331	0.219505	0.0878035
gga-miR-7447-5p	--	AAAGTTGGTAGTGATTGCTGATG	--	1	+	29739066	29739127	AAAGUUGGUAGUGAUUGCUGAUGUGAAUUCUGAGACCACCUGAGCACUCAGCCCAACUCCUA	--	--	0	0	0.044527	0.205207	0.0439011	0.0439018
gga-miR-6571-5p	--	GTAAAGCTGTTTGGATCTTCAG	--	2	+	64365096	64365201	UCAUUUGUUGGCUUGAGGUUGUAAAGCUGUUUGGAUCUUCAGGGAAAUUGGCAACACUGAGAGACCACAUACAGCUUUGAAAACCUAAUUGCUGAAAUAUUCUGCC	--	--	0.0936986	0.0485009	0	0.0410414	0	0
gga-miR-1799	--	TGAAGTGATGATGCCTGATTA	--	5	+	40146474	40146557	CUUAUUAGUUAGAUGUCAUUAUUUUACAAGCCGUAACUGAUCAAACAUGAGUACUGGCUGAAGUGAUGAUGCCUGAUUAGCAAG	--	--	0.140548	0.485009	0.044527	0.697704	0.263407	0.570723
gga-miR-215-3p	--	CCTGTCATTTCTATAGGCCAATA	--	3	+	18902895	18902999	UCAGUAAGAACUGGUGUCCAGGAAAAUGACCUAUGAAUUGACAGACUGCUUUCAAAAUGUGCCUGUCAUUUCUAUAGGCCAAUAUUCUGUGCACUUUUCCUACUU	--	--	0	0.0485009	0.222635	0.0410414	0	0.0439018
gga-miR-1792	--	GCGATAGCTCAGGAACACTGCAG	--	3	+	8420466	8420564	UCCAAAGCCACCUCUAUGCUGCGAUAGCUCAGGAACACUGCAGUCAAGAACACAUACUGGAGUGUUCCUGGGGUAUCACAGCGUAGGGGUGGUUUUGGA	--	--	0	0	0.089054	0.246249	0.307308	0.0439018
gga-miR-1729-5p	--	ATCCCTTACTCACATGAGTAGTC	--	15	+	1058317	1058387	CCUGCAUCCCUUACUCACAUGAGUAGUCGUAUCUAUUUCAGUGGGACUACUCGGUGAGUAAGGAUAGCAGG	--	--	5.66877	4.9956	5.56587	6.81288	6.27786	6.19015
gga-miR-1613	--	TACATGCGTATATTCTGGCAG	--	2	+	77820308	77820384	UCAGACUGCUAGCUGGAAUGGACUGAUGUAGUGAAGAUGGUGAAAACUACAUGCGUAUAUUCUGGCAGAGAGUCUGA	--	--	0.327945	0.582011	0.133581	0.246249	0.219505	0.219509
gga-miR-12258-5p	--	TGCACGGCTGCAGCCTCCTCACC	--	28	+	4004631	4004697	UGCACGGCUGCAGCCUCCUCACCCAUAUCCCAAGGAGAAGCAGGGGAGGAGGACGCAGCCAUGUGCU	--	--	3.37315	3.05556	2.8052	2.33936	3.24868	2.85362
gga-miR-30e-3p	--	TTTCAGTCGGATGTTTACAGC	--	23	+	5078843	5078938	CGGGGCAGUCAUCGCUGCUGUAAACAUCCUUGACUGGAAGCUGUGAGGUGUCAGCGGGGGCUUUCAGUCGGAUGUUUACAGCUGCAGGCUGCUGCA	--	--	1029.65	1067.26	968.15	1067.94	986.37	1056.23
gga-miR-3528	--	CATGCCCCAGTCGTGTTGCAGA	--	17	+	8022005	8022101	GCAUUACACAGGUCCAUGCCCCAGUCGUGUUGCAGAUAUGGCUGUAGUGCCAUGUUUGUGUCAUUAGGUGGCAGAAAGGAAAAGGCUGUGUCUUUGC	--	--	0.234247	0.339506	0.356216	0.410414	0.834121	0.351214
gga-miR-12255-5p	--	GGGTCGGGCGCGGTGCTGCACTG	--	27	+	7193538	7193605	GGGUCGGGCGCGGUGCUGCACUGCGCGUCCAAAGGUCACACCGCCGUGGCACCGCUCCCGGCACCGCG	--	--	0.0468493	0	0.044527	0	0	0
gga-miR-1687-3p	--	TTGCTGGCTGTTTCTCAGTGA	--	20	+	13077816	13077906	GAUUUCUUUGUGUCUGUGGUCUGAGGAAAUGAGCCAGCUGAGUUAGCAACUUCUUUGCUGGCUGUUUCUCAGUGACUGCAGCAUAAAAAUC	--	--	0.140548	0.291006	0.089054	0.328331	0.0878022	0
gga-miR-132c-5p	--	AGCCATGACTGTAGACTGTTACT	--	19	+	5663433	5663498	AGCCAUGACUGUAGACUGUUACUGUCCUGUCCCUACGCAGCAGUAAGCAGUCUAGAGCCAAGGUGC	--	--	2.34247	1.94004	2.53804	1.51853	2.23896	1.49266
gga-miR-3539	--	CAGAGGAAGACTGATGCTAGTT	--	1	+	81546036	81546106	CUCCUUGCAGAGGAAGACUGAUGCUAGUUAUUUGUUUCCCACUGACUGCCUCAUGUCCUCCUCUAGGGGAG	--	--	1.96767	1.16402	2.18182	1.51853	2.23896	2.19509
gga-miR-3538	--	GTTCGGTGATGAAACCATGGA	--	1	+	50695231	50695305	GCAGUUCGGUGAUGAAACCAUGGAAUAAGCGCUGGGCACAGCGCCUGACAUCCGUGAGGAGUCGUUCCAUGCUGC	--	--	0.65589	0.970019	0.534324	0.328331	0.570714	0.614625
gga-miR-1764-3p	--	AGCTGCTTGTTGGCTGGGGAG	--	15	+	6080593	6080695	ACCUGCUUGGCGUUCCAUGGUGGCUCAGGCAGCAGGAGGCUUGUGAGAUGCUGGCGUUCAAGCUGCUUGUUGGCUGGGGAGCUGUGGAUGUGGACAACUAGGU	--	--	0.234247	0.291006	0.267162	0.164166	0.131703	0.219509
gga-miR-34b-3p	--	AATCACTAAATTCACTGCCATC	--	24	+	5568839	5568922	GUGCUUGGUUUGCAGGCAGUGUAGUUAGCUGAUUGUACCCAGCGCCCCACAAUCACUAAAUUCACUGCCAUCAAAACAAGGCAC	--	--	3.74795	3.58907	3.38405	5.58163	4.87302	5.66333
gga-miR-128-2-5p	--	GGGGGCCGTTACACTGTAAGAGA	--	2	+	45455218	45455301	UGUCCAGCUGGAAGGGGGGCCGUUACACUGUAAGAGAGUGAGUAGCAGGUCUCACAGUGAACCGGUCUCUUUUCCUGCUGUGUC	--	--	1.12438	1.06702	0.979594	0.943953	1.05363	1.14145
gga-miR-6699-5p	--	TGAAGACCTCGTGCATTGTAGC	--	1	+	169646332	169646360	AGCAAGCAUUGGCACUCUCCUCUUGUGAAGACCUCGUGCAUUGUAGCUUUGCAUGCUACAAUACACUAGAUCUUAGUCAAAAGGAAAGCCAAGGCACAGAUGGAAGUGAA	--	--	0.0468493	0.0485009	0.044527	0.164166	0.263407	0.395116
gga-miR-12285-3p	--	CCCGGCCTGCCCCGCTCATCT	--	4	+	90919128	90919188	GUGAGUGCUGCAGGGCCGCGCGCUGACGUCCCCCCGCGCCCGGCCUGCCCCGCUCAUCUCC	--	--	0.0468493	0	0.089054	0.0820828	0	0
gga-miR-12273-3p	--	CGGCCGGTCGCCGCGGGCAAC	--	4	+	77374170	77374222	CUGCCCGCGGCGCCCGGCCGCGGCUCAGGCGCGGCCGGUCGCCGCGGGCAACG	--	--	0.187397	0.242505	0.311689	0.369373	0.439011	0.921937
gga-miR-7441-5p	--	CTGAGGAGGGTTTGTAACATGG	--	17	+	2437879	2437941	CUGAGGAGGGUUUGUAACAUGGGGAGAAGGUGAAGGUGACUCAUGUUGGGAUCCUCUUCUGCA	--	--	0.0468493	0.242505	0.222635	0.28729	0.0878022	0.175607
gga-miR-29a-3p	--	TAGCACCATTTGAAATCGGTT	--	1	+	4030403	4030491	ACCCCUUUAGAGGAUGACUGAUUUCUUUUGGUGUUCAGAGUCAAUAAUAUUUUCUAGCACCAUUUGAAAUCGGUUAUAGUGAUUGGGGA	--	--	1.40548	1.11552	1.24676	0.943953	1.05363	0.878035
gga-miR-2954	--	CATCCCCATTCCACTCCTAGCA	--	Z	+	70937430	70937497	CUGAGAGGGCUUGGGGAGAGGAUUGUAGUGGAGCUCCAUCCCCAUUCCACUCCUAGCAGCUCUCUGGC	--	--	403.982	425.984	383.778	347.087	360.823	356.702
gga-miR-1791-3p	--	GCGATGTGACTGATGCAGGCTG	--	11	+	8957145	8957229	UGAAGCACCAUGUUGGGCUGCAUCAGUCAUGCCAUGUUAUGAAACCUAACGCGAUGUGACUGAUGCAGGCUGACGUGAUGUGUCA	--	--	1.21808	0.776015	1.29128	0.246249	0.79022	0.834134
gga-miR-202-5p	--	TTTCCTATGCATATACTTCTTT	--	6	+	22456105	22456193	GCUCGUUGUUCCUUUUUCCUAUGCAUAUACUUCUUUGAGAGUUUGAUCUAAAGAGGCAUAGAGCAUGGGAAAAUGGGGCGACUGAGGUA	--	--	59.5923	60.2867	75.874	47.567	53.0325	45.2188
gga-miR-6645-5p	--	TGGGAGGTAGCAGTGGTGGTGA	--	5	+	39339701	39339810	UGAGCCCUAGUGUCCCCAGUUUGGGAGGUAGCAGUGGUGGUGACAGUGGUGGUGGUGACACCCCCAACACUCACCCCCACUGCUCUCUCCCAGGGAUGAGGAAAUUCAGA	--	--	0.562192	0.485009	0.311689	0.615621	0.965824	0.351214
gga-miR-1648-5p	--	CGGCTCGGCTCGGCTCCGCTC	--	20	+	13817409	13817494	UGGCCGGCGGCUCGGCUCGGCUCCGCUCACACCAGGAGCAGCGGCUCGGCGUGGUGGGAGUGGAGCGGAGCUGUCCGCCGUAGCCG	--	--	0.0468493	0	0.044527	0.0820828	0.131703	0
gga-miR-34c-3p	--	AATCACTAACCACACAGCCAGG	--	24	+	5569576	5569649	AGCCUGGUUACCAGGCAGUGUAGUUAGCUGAUUGCCACCAGGACCAAUCACUAACCACACAGCCAGGUAAAAAG	--	--	0.936986	1.30953	1.24676	1.76478	1.66824	1.53656
gga-miR-100-5p	--	AACCCGTAGATCCGAACTTGTG	--	24	+	3364559	3364638	CCUGUUGCCACAAACCCGUAGAUCCGAACUUGUGGUCAUAUUCCACACAAGCUUGUAUCUAUAGGUAUGUGUCUGUCUGG	--	--	11186.2	11322.1	14035.1	12719.8	13568.9	11961.5
gga-miR-1735	--	AGGGGCTTTGGGCAGCATCTG	--	27	+	6797638	6797716	CUCCUGCAGGCUUACAGGGGCUUUGGGCAGCAUCUGUUGUUAGAUGGUCAGAUGCUGUGCAAAGCACGUGCUGCAGUAG	--	--	0	0	0	0.0410414	0	0
gga-miR-125b-3p	--	ACAAGTCAGGCTCTTGGGACCT	--	1	+	100428097	100428186	AUCAGACUUUUCCUAGUCCCUGAGACCCUAACUUGUGAGGUUUUGUAGCAACAAUCACAAGUCAGGCUCUUGGGACCUAGGCGGAGGGGA	--	--	158.491	169.22	210.345	180.172	182.233	165.993
gga-miR-1685-3p	--	ACAGTAATGGTATGAACTCAGA	--	2	+	24783225	24783319	GUUUUUUAGUGGCACAGUUGGAGUCACUACCAGUGCUGUGUUUGACUACGUAUGUAACCACAGUAAUGGUAUGAACUCAGAUGUGCUACAGAAAU	--	--	0	0.242505	0	0.205207	0.131703	0.0878035
gga-miR-6680-3p	--	GTTGCTGATGAAGATACTGAAT	--	21	+	2641819	2641928	CCAAGGUAUGUAUGGUAUGUAUCAUUGGUGUACUUGGUGAGGGUGGGCCCUGCCCUCAUUGAGGUUGCUGAUGAAGAUACUGAAUGAACUUGGACCCAGCACUGCCAGCA	--	--	0	0.145503	0.044527	0	0.0439011	0.0439018
gga-miR-30c-1-3p	--	TGGGAGAGGATTGTTTACGCC	--	23	+	5080066	5080154	ACCAUGCUGUAGCACGUGUAAACAUCCUACACUCUCAGCUGUGAACUCGAGGUGGCUGGGAGAGGAUUGUUUACGCCUUCUGCCAUGGA	--	--	242.117	237.461	213.507	221.624	237.856	233.557
gga-miR-1677-5p	--	TCCTGCACCGCTGAAGTCAAT	--	3	+	73971334	73971406	AGGGUCUGAUCCUGCACCGCUGAAGUCAAUGGAAGUUUUGUCAUUGACUUCAGUAGGAGCAGGAUUUGAACCU	--	--	6.04356	6.54763	6.05567	7.05912	6.49736	6.58527
gga-miR-193b-3p	--	AACTGGCCCACAAAGTCCCGCTTT	--	14	+	1167549	1167631	GUGGUUCCAGAGUCGGGGUUUUGGGGGCGAGAUGAGCUUAUGUUUUAUCCAACUGGCCCACAAAGUCCCGCUUUUGGUGGUCA	--	--	41.6022	40.3043	45.5066	40.7952	52.3301	51.1895
gga-miR-1788-5p	--	GGCTTGTTTTCCGTTGCCTGCG	--	7	+	22354015	22354102	CCACCCUGCUGUGUCCCGGGCUUGUUUUCCGUUGCCUGCGGUGUGUUGCAGUGACUCAGGCAGCGAAAGCAAGUCUGGGAGGCUGUGG	--	--	4.87233	4.41358	6.94621	2.79082	4.82912	5.13651
gga-miR-7449-3p	--	AGGGTTGGACGAGATGGTCTTT	--	2	+	127199774	127199804	AGGUCAUCUAGUCCAACUUCCCUGCAAUGAACAUGUACACAUACAGAGGGUUGGACGAGAUGGUCUUU	--	--	0.0468493	0	0	0.123124	0.307308	0.351214
gga-miR-1306-5p	--	ACCACCTCCCCTGCAAACGTCCAGT	--	15	+	1583108	1583176	UCCACCACCUCCCCUGCAAACGUCCAGUGACGCAGAGGUAAUGGACGUUGGCUCUGGUGGUGAUGGACA	--	--	7.87069	7.51764	9.97404	8.45453	9.57044	7.24379
gga-miR-7438-3p	--	TGAGTTGTCTTCCTGAATAGTT	--	Z	+	70979936	70980000	UUUUUCAAGGGGACAACUCAGAGCAGGACGCUACUUUGGUAUUUGAGUUGUCUUCCUGAAUAGUU	--	--	0	0	0	0	0	0.0439018
gga-miR-1782	--	ACATTCATTGGAGCAGGGACA	--	2	+	68485722	68485820	UGUUAGACUGCCUGGAUUCUAGCCCUUCUCCAAAUGAAUUUUUAAUAGAAAAUAAUUAAACAUUCAUUGGAGCAGGGACAGGAGCCCAGGUCUCUCUCA	--	--	5.24712	3.63757	2.89425	4.92497	3.51209	5.18041
gga-miR-6543-5p	--	GCTGTTACCTGAGAGAAGATGCTG	--	1	+	134916645	134916752	CCAUUCCCUUUUGUCCUGUUGCUGUUACCUGAGAGAAGAUGCUGACUCCCUCCGACCACAGCCUCCUUUCAGGUCACUGUAGGCAGCGCUAAGGUCUUCCCUGAGCCU	--	--	1.12438	0.339506	0.311689	0.533538	0.39511	0.175607
gga-miR-1766	--	GGCAGATGATTGAAAACTGAG	--	2	+	75621042	75621134	UUGGCUGUCUUUCUCUUGUGGCAGAUGAUUGAAAACUGAGCUAUUGCCCUAGCACAGGCAUUUGAUUAUCAUAUGUUGAGCUUGAUUUGCUAA	--	--	0	0.0485009	0	0	0	0
gga-miR-133c-3p	--	TTGGTCCCCTTCAACCAGCTGC	--	23	+	4489878	4489956	UGCCUUCCUGGGGCUGGUAAAAAGGAACCAGAUCAACUACAACUGGAUUUGGUCCCCUUCAACCAGCUGCAGUGGGGCA	--	--	5.48137	12.6587	26.9388	6.4435	10.229	6.01454
gga-miR-6684-5p	--	TTTGCTGCACTGAAGATG	--	12	+	11483146	11483255	CAGACCAGCAUCUGCUCCCUUUGCUGCACUGAAGAUGCAGUGAGGUGACCACCCUCAGAUGCUCGGCAGGGCAGGCAGCAAAGCUGCAGCACAACACAGGUCCCCAUCAG	--	--	0.0468493	0	0	0	0	0
gga-miR-6641-5p	--	ACAGCTTTTTTATTTCCAGTTA	--	1	+	180517109	180517212	AAAAAUGAUUUCCUUACAGACAGCUUUUUUAUUUCCAGUUAAUGUGUUUUAAAUACCUGCUGGGAGAAAAAAGCUAUGUGCAAGGUGACAGAAAACAAGAGGCA	--	--	0.0468493	0	0	0	0	0
gga-miR-1451-3p	--	CGTAACTCGCTGCTGTGAGAGGC	--	3	+	75994558	75994667	CAGAGCAAGCGCAGGAGCUGCUGCCUCGCACAGGAGCAAGUUACCGCGUUCAGCUCGCCUGCCGUAACUCGCUGCUGUGAGAGGCAGCGGCUCCUGGCUCUCCCUGCUCC	--	--	3.18575	3.49207	3.33952	2.95498	3.51209	2.63411
gga-miR-6691-5p	--	GTGCATGATGAACCTGCTGAGC	--	7	+	5823524	5823633	AAAUCCAUCUCCUUGUUGUAGUGCAUGAUGAACCUGCUGAGCUGCUGCUGCUGCUGAGGCGGGCAGCAUGGAGGGAGAUGGAUGAUUAAGUGAUGAUUAAACCUUUCUGG	--	--	0	0.0970019	0	0.0410414	0.0439011	0.0439018
gga-miR-7464-3p	--	TGGCACTGCACTGAGTCATTGGC	--	3	+	16986720	16986776	CAAUGGCUCAGUGCAGUGCCGUUCUGGUGACCAAUGGCACUGCACUGAGUCAUUGGC	--	--	0	0	0	0.0410414	0	0
gga-miR-6568-5p	--	GCGGCCGCCATCTTGCTTGCG	--	3	+	55290512	55290609	CCGGCUGCCCGCCCACCCCGCGGCCGCCAUCUUGCUUGCGGCCGGCUACCCACAACCAAGAUGGCGCCCGGGCGGUUGGCGGUGCCGGCACCACCCCA	--	--	0	0.0485009	0	0.0410414	0	0
gga-miR-7442-5p	--	CACAGGACCATGGGAGCGTGGC	--	17	+	2812025	2812082	CACAGGACCAUGGGAGCGUGGCCACCUUGCCCUGAGCUCUGCUUCCUCCUCCUGCAGC	--	--	0.562192	0.436508	0.534324	0.123124	0.0439011	0
gga-miR-129-5p	--	CTTTTTGCGGTCTGGGCTTGC	--	5	+	21753622	21753687	CUUUUUGCGGUCUGGGCUUGCUGUACAUAACUACCUACCCGGGAAGCCCUUACCCCAAAAAGCAUU	--	--	35.0433	40.6438	26.5826	38.7431	31.0381	34.1556
gga-miR-6563-5p	--	GTTGGTCGGTTGTGCTTAGAGA	--	3	+	16477231	16477340	AGCUACUGACUGCUGCAUCAGUUGGUCGGUUGUGCUUAGAGAUGUUUAUUUUCAUGUCCCACUGGGCACACUGUGACUGGCUACAUGCAGCACUCAGUUACUUCAGCUCC	--	--	0.140548	0.485009	0.133581	0.164166	0.131703	0.395116
gga-miR-12207-5p	--	ACGCAGCACGCAGGAGAGCCGAG	--	1	+	421772	421832	ACGCAGCACGCAGGAGAGCCGAGGCACUAUGGAAACACUCUGCUCCCUCCCGGCUGCCUGC	--	--	0.327945	0.194004	0.178108	0	0.0878022	0.219509
gga-miR-6675-3p	--	TCTCTGGACGTCACGTGTGAGG	--	24	+	3371186	3371294	UUUGGGGCCUCCUGCCACCAUACGUGAGGUUCAUUGGGUUCCAUAGAGCUGCAUGGGUUACAUCUCUGGACGUCACGUGUGAGGGCAGAUGCUCAGUGCACAGAAGAGU	--	--	0.468493	0.630512	0.311689	0.533538	0.658516	0.395116
gga-miR-140-5p	--	AGTGGTTTTACCCTATGGTAG	--	11	+	19068658	19068752	UGCGUCUCUCCGUGUCCUGCCAGUGGUUUUACCCUAUGGUAGGUUACGUCAUGCUGUUCUACCACAGGGUAGAACCACGGACGGGAUGCCGGGGC	--	--	125.275	139.537	109.982	131.004	128.674	149.925
gga-miR-24-3p	--	TGGCTCAGTTCAGCAGGAACAG	--	Z	+	41661395	41661462	CUCCGGUGCCUACUGAGCUGAUAUCAGUUCUGAUUUUACAUACUGGCUCAGUUCAGCAGGAACAGGAG	--	--	574.888	677.752	764.128	745.928	685.603	668.492
gga-miR-1708	--	TGGGGTGTGGAATGAATCCTT	--	1	+	196529629	196529722	CUGACCUAAUGCUUGGGAUGGGGUGUGGAAUGAAUCCUUGUUUGCUUCUGAGGAAGGAUUGAUUGUUCACCCUCAUUCUGAAAUUAGAAAGCAG	--	--	1.45233	0.873017	1.51392	0.656663	0.878022	0.570723
gga-miR-1574-5p	--	CTGTGACTTCTCCTTGTCAGA	--	10	+	6140689	6140762	CAGCCAAUGCUCUGUGACUUCUCCUUGUCAGAGCUGGGGUAUACUGACAGGAGGAUGUCAGGAAGCUUCUGCUG	--	--	0	0	0	0	0	0.0439018
gga-miR-1654	--	TTGCTGGTGGAGGGAGCTGAG	--	4	+	89198029	89198122	GAUGUCAGUAGAAAAAAUUGAGGCUUGCUGGUGGAGGGAGCUGAGCAUGGCUCAAUCACUAUUACCAGCAGUAGAAGUUUUGAUUUAAGGGAUC	--	--	0.0468493	0.145503	0.089054	0.164166	0.0439011	0.219509
gga-miR-221-5p	--	AACCTGGCATACAATGTAGATTTCTGT	--	1	+	111967038	111967136	GACUGUCCAGGUUUGGGGCAUGAACCUGGCAUACAAUGUAGAUUUCUGUGUUUGUUAAGCAACAGCUACAUUGUCUGCUGGGUUUCCAGCUGCCUGGAA	--	--	180.229	163.982	151.347	143.563	147.508	176.968
gga-miR-26a-3p	--	CCTATTCTTGGTTACTTGCACTG	--	2	+	4629095	4629171	GUCACCUGGUUCAAGUAAUCCAGGAUAGGCUGUAUCCAUUCCUGCUGGCCUAUUCUUGGUUACUUGCACUGGGAGGC	--	--	16.8658	13.9683	15.718	14.9801	15.7166	13.5217
gga-miR-12233-5p	--	GAGGGAACCGGTGGGGGGCACGGA	--	19	+	4316423	4316484	GAGGGAACCGGUGGGGGGCACGGACUCCCCGUACGGGGAGUCCGUGCCCCCCCGGUUCCCUC	--	--	0.0468493	0.0485009	0.044527	0.0820828	0.0878022	0.0439018
gga-miR-1737	--	CAGCACTGCTGCGCTCGGTG	--	10	+	17518771	17518863	CCUGCUGCUGCUGCAGCACUGCUGCGCUCGGUGUCCCACUGCCCCUCAGCAGCACCGUCCCGGGCUCCGCUCUGUGCUGUGAGCAGCAGGAGG	--	--	2.67041	1.60053	2.76067	2.05207	2.94137	2.4146
gga-miR-1803	--	ATTGACTTCAGCGGGGTTTGG	--	2	+	92556439	92556527	GGACUUAGGGCAUGAUCCAGAGCCCAUUGUAGUCAAUGGGAGUCUUUUUCCAUUGACUUCAGCGGGGUUUGGAUCAGGCCUUUACUUCC	--	--	0.0468493	0.0970019	0.089054	0.205207	0.131703	0.351214
gga-miR-191-3p	--	CTGCCCTGGGATTTCGTTACC	--	12	+	12045267	12045326	CAACGGAAUCCCAAAAGCAGCUGUCCCCGCAGCGCCCAGCUGCCCUGGGAUUUCGUUACC	--	--	1.96767	2.32804	2.04824	2.8729	1.71214	2.06338
gga-miR-3530-3p	--	CAATGGTGTGAGCTGGGATGG	--	7	+	25267461	25267549	GAAGGCUGAUGCGCCCGCUCUGCUCGCACCAUUGUGGCGGCCGAACAAAGCACAAUGGUGUGAGCUGGGAUGGGCGCUGGCCGGCCCUC	--	--	1.92082	1.45503	0.44527	0.820828	1.14143	1.79997
gga-miR-10c-5p	--	TACCCTGTAGACTCGAATTTGT	--	33	+	7660063	7660123	UACCCUGUAGACUCGAAUUUGUGUGAGCGUCUCCGAGUCGCAAAUUCGUCUCUAGGGGAAUA	--	--	1608.24	1512.89	1403.85	1551.41	1657.22	1848.48
gga-miR-146b-3p	--	CCCTATGGATTCAGTTCTGC	--	6	+	24096323	24096427	GGACUGGCUGCUUGGCUUUGAGAACUGAAUUCCAUAGGCGUUAAAGCAUCCAAAAAUGCCCUAUGGAUUCAGUUCUGCAGUUGGGCAGCAAAUAAACCUCCAGCC	--	--	53.174	49.4224	40.6086	44.6531	39.8622	45.8774
gga-miR-1464	--	TGCTGTTTGCAGGGCCGCCTCGGA	--	15	+	11722649	11722758	GGCGCAGCACCUGCGUGUGUGGCUGUGCUGUUUGCAGGGCCGCCUCGGAUCCGCCCAACGCCGGCUGCCCGCACACAGCACACACAGCACACAGCACACGCGUGCAGCGC	--	--	0.0468493	0.291006	0.044527	0.123124	0.175604	0.0439018
gga-miR-124c-3p	--	TCAAGGTCCGCTGTGAACACGG	--	3	+	106368947	106369014	UGCCGCCUGGAGGAUCCGCUCUUGGCAUUCACCGCGUGCCUUAAUUGUAUGACAUUAAAUCAAGGUCCGCUGUGAACACGGAGAGGCAGAGCCUGGGAGCG	--	--	0.140548	0.0485009	0.311689	0.164166	0.175604	0
gga-miR-12216-3p	--	TCAGCACCCCTCCGTCCCCGCAGT	--	10	+	1784374	1784461	CGGGCGGGGGCGCGGGGUGCUGAGCCGUCCUUUGGGGUCUCUCCCCGCGUGGGCCUCCCCCCGCUCAGCACCCCUCCGUCCCCGCAGU	--	--	0.281096	0.0485009	0.044527	0.123124	0.0439011	0.0439018
gga-miR-1763b-5p	--	TCGCCTTCCCTTCCCGCCCTTC	--	5	+	57739047	57739103	UCGCCUUCCCUUCCCGCCCUUCCGGAAGGGCGGGAAGGGCGGGAAAGGAAGGCGAAG	--	--	0	0.0485009	0.044527	0	0.0878022	0.131705
gga-miR-1636	--	TGCAGGTGATGGCGGGGCTG	--	15	+	4990569	4990656	CAGGCAUCCAUCUGCUGCCCCGUCACUCCUGAUACCGCUGUGCUGGUAAGGUGCAGGUGAUGGCGGGGCUGCCGGUGUGCCAUGCCUG	--	--	0	0.0485009	0.044527	0	0	0
gga-miR-7476-3p	--	TCACAACAGTGGGCTGAATGC	--	15	+	5278378	5278440	UCUUAGCUCAUCUGAUGUGAAGCUGUGCAAGAAAAUAAUUUUUCACAACAGUGGGCUGAAUGC	--	--	0	0	0	0.0410414	0	0
gga-miR-6573-3p	--	GGAGGCACTCTGACTTCTCGGA	--	27	+	3923000	3923118	CUGUGCUGUGUGGGACUGUUGGAGAAGUGAGGGGCUCUCUGUGCCGUGGAAAUGCGGUGAGCUCUCCAUCGGAGGCACUCUGACUUCUCGGACAGGGCUGCACUGGUGGUUAAUGCUUU	--	--	0.140548	0.0485009	0.044527	0	0.219505	0
gga-miR-1773-3p	--	GGAGAGGCATTGTCCCCTGGA	--	20	+	8125612	8125689	CAACCUCUGCUUGGGGGAGGAGGGACCUCUGCUUUGCCAGGUGCUUUGAGGAGAGGCAUUGUCCCCUGGACAGGGAUG	--	--	0	0	0	0.0410414	0	0
gga-miR-12287-5p	--	TGGGGGTGCAGGTGGGGGGCT	--	33	+	7226002	7226066	UGGGGGUGCAGGUGGGGGGCUUAAGUCCAAGGGGUGUCUUCACUCCCCCCCACUGUGCCCCCAGG	--	--	0	0	0.089054	0	0	0
gga-miR-10585-5p	--	TGATGAAATCCCCCTATGGCCTGT	--	2	+	473003	473064	UGAUGAAAUCCCCCUAUGGCCUGUUUGUGAUGGUACCGCAGGAUAGGUGGGUUUCAUUGAAU	--	--	3.56055	1.94004	1.46939	1.76478	2.10725	1.88778
gga-miR-1611	--	GGAGGGCTTGCAGGCGGTGTGC	--	10	+	15075945	15076015	UACCUACACAGGCAGACUUGCCCUCACCUCGUUGCUGCACAGGUAGAGGAGGGCUUGCAGGCGGUGUGCCUCUGGUUUGGUG	--	--	0	0.0970019	0	0	0.0878022	0
gga-miR-7473-3p	--	ACTTAGGCACGTAAATCTCTCGT	--	7	+	33400173	33400234	AAGAGAUUUACAUGCGUAACUCCCAUUAACUCUUAUGGGACUUAGGCACGUAAAUCUCUCGU	--	--	0	0.0485009	0	0	0	0
gga-miR-12264-3p	--	ATGGCTGTTCTAGCAGTAGATC	--	3	+	87056422	87056484	ACCUACUGCUAGGUUUGCCCUUAAACUAUGGUGCUCUCUUAAUGGCUGUUCUAGCAGUAGAUC	--	--	3.46685	3.63757	2.53804	1.80582	2.59016	2.4146
gga-miR-6603-3p	--	AAGGACAAGAGGAAATGGTTTCA	--	5	+	23342594	23342703	GGAACUUCCUGUGCUUUAGUUUGUGGCUGUUUCCCCUUGUCCUGUCGCUGUGCAUCGCUGAAAGGACAAGAGGAAAUGGUUUCAAACUAAAAGAGAGGAGAUUUAGAUAC	--	--	0.0936986	0	0	0	0	0.0878035
gga-miR-7445-3p	--	GGATGAGTCTGTTTAACTTTAT	--	1	+	163113712	163113771	AAAGUUAAACAGACUCAUCCACGAGACACUCCUGUUGUGGAUGAGUCUGUUUAACUUUAU	--	--	0.0468493	0	0.044527	0.0410414	0	0
gga-miR-1744-3p	--	ACTTCAACAGGAGCAAGACTGA	--	10	+	10362842	10362930	GGAGUCAGGACCCAGUGCUGCUCUGUUGAACUCAAAAGCUGAACCCUGUUGUUGACUUCAACAGGAGCAAGACUGAGCCCUGAUUUUCC	--	--	0.281096	3.92858	6.2783	15.0622	13.1703	14.0925
gga-miR-1786	--	ATTCTTTTCTGCTGTGTTACT	--	14	+	8128601	8128709	UCUGCUCCCUGACUGCUUCUAAUUCCUUAACACAACAGGAAACAAAUUCAGCAUUAAAAUAUGAUUCUUUUCUGCUGUGUUACUGAAUUAAAAGUACUUCAAAGAGAGA	--	--	27.8753	17.3148	16.564	24.4196	32.7502	23.0045
gga-miR-10585-3p	--	GGATAGGTGGGTTTCATTGA	--	2	+	473003	473064	UGAUGAAAUCCCCCUAUGGCCUGUUUGUGAUGGUACCGCAGGAUAGGUGGGUUUCAUUGAAU	--	--	0	0	0.044527	0.0820828	0	0
gga-miR-6668-3p	--	TGGAATCGTGGAATAGCTTGGGT	--	4	+	34026304	34026413	UGGGUGAUCCUGUUGGUCUUUUCUAACCAUGGUGAUUCAAUGAUUCUAUGAUGUGUUGCCAUGGAAUCGUGGAAUAGCUUGGGUUGGAAGGCACCUGAAUGCCCACCCAG	--	--	0.234247	0.145503	0.400743	0.0410414	0.175604	0.175607
gga-miR-135a-5p	--	TATGGCTTTTTATTCCTATGTGA	--	1	+	46333899	46333998	AGAUAAAUUCACUCUAGUGUUUUAUGGCUUUUUAUUCCUAUGUGAUAGUAAUAAAGUCUCAUGUAGGGAUGGAAGCCAUGAAAUACAUUGUGAAAAAUCA	--	--	2.62356	3.73457	4.9425	3.24227	3.38038	4.52188
gga-miR-7443-5p	--	TGGTGGCTGCCCTCAGGGAGAGC	--	18	+	9722497	9722555	UGGUGGCUGCCCUCAGGGAGAGCCGAUUCCCCCAGCUCCCUUGGGCUGCAGCACCCUCC	--	--	0.327945	0.145503	0.311689	0	0	0.351214
gga-miR-1416-5p	--	TCCTTAACTCATGCCGCTGTG	--	Z	+	34934091	34934179	UGAGGCUGAUACUUUUUCCUUAACUCAUGCCGCUGUGCCUUUAUAUUUUAUUUCACAAUUGUAUGAGUUGAGUACAGAGUAUCAGUCCA	--	--	30.1241	32.6896	34.4639	38.9073	37.2281	37.7555
gga-miR-1700	--	CATCAGAGGGATAGGATGGAC	--	1	+	138088445	138088544	UGGAAGAGCUGGAGGCACACGUUAUCCUUUGCUAUGCCUAUGAUGGGUGUGAUUACCUCCAUCAGAGGGAUAGGAUGGACAGCUGGUGUCAGUGAAACUA	--	--	0.0936986	0.145503	0.178108	0.246249	0.0439011	0.0878035
gga-miR-6608-3p	--	AGCACTGCAAGAGGGAGAGAGAT	--	1	+	65838543	65838652	UGGCCUGAUGGGGAAUGAAGAUGAACUGUUCUUCCUCACCAGUGCCUCAGUGUUGAAAGUUGAGCACUGCAAGAGGGAGAGAGAUCAUGGUCAUUCUUUGUCCCAGGAAC	--	--	0.374795	0.436508	0.311689	1.39541	0.570714	1.14145
gga-miR-6708-5p	--	TATGGGAGGAGCGGTGAGCAGCA	--	1	+	572202	572311	AGGAUGAUGGAGCAGAGCCUAUGGGAGGAGCGGUGAGCAGCAGCACAGCAUCAGCUCCUGCCCGCCCUGUCCCCAUGGCUCCAUCCAUCCCAGCACCGCGGCCGCUCCAC	--	--	0	0.0485009	0	0	0	0.131705
gga-miR-6655-5p	--	TCTGCTAGGAGGCTGTGTATCCT	--	3	+	96737525	96737634	AAAUUGGUGCCCAGGUGGUUCUGCUAGGAGGCUGUGUAUCCUGGGUGCCAGCAGGAUAGCAGUGCCCUAGUAGUGGCAUUGGGUGUCCACUGCAUGGGGGUCUUCUCCAU	--	--	1.07753	1.26102	0.756959	0.656663	0.570714	0.570723
gga-miR-6576-3p	--	AGTGTCTGTATTCCCTTGAG	--	22	+	197998	198103	CUACAAGCAGUGUGUUUUCUCAUGGUUGUAUCUGAACACUUUGAAGGUAAAUAAAUGGAAAAGUGUCUGUAUUCCCUUGAGAGAACAUGCUGUUAGUGCUACCAUC	--	--	0.140548	0	0.044527	0.123124	0.0439011	0.0439018
gga-miR-6677-3p	--	TGCTCAGACACGTCAGGAGGA	--	20	+	13075092	13075200	AGCUUAAUGCAAGCUCCUUCUCACUGCCUGCCCUGAGCACACCAUCAAGCAUUGGUGCUCAGACACGUCAGGAGGAGGUACUGUGCAAACGCCCUGCAAAGGGAUUCUG	--	--	0	0.0485009	0	0.0820828	0	0.0439018
gga-miR-1788-3p	--	CAGGCAGCGAAAGCAAGTCTG	--	7	+	22354015	22354102	CCACCCUGCUGUGUCCCGGGCUUGUUUUCCGUUGCCUGCGGUGUGUUGCAGUGACUCAGGCAGCGAAAGCAAGUCUGGGAGGCUGUGG	--	--	0.0468493	0.0485009	0.089054	0.0820828	0.0878022	0.0878035
gga-miR-1552-3p	--	CTAGCTGCTCTGCACTGACTG	--	1	+	134912417	134912499	UCUACAUGGGGAGGUUAGUGCGCGGUAAGCUAGGGUGUGAGCUGACAGCACGCUAGCUGCUCUGCACUGACUGCCCCUGUGGA	--	--	56.4534	55.5821	46.3526	54.9134	55.0081	59.7942
gga-miR-7472-5p	--	ATGTGCTGGAGATGAAGCTGGA	--	6	+	31015797	31015859	AUGUGCUGGAGAUGAAGCUGGAGCUCCUCUCCAUCACUCUGCAGCUCCUCUCCAUCACUCUGC	--	--	0.796438	1.64903	1.42486	1.55957	1.09753	1.66827
gga-miR-1a-3p	--	TGGAATGTAAAGAAGTATGTA	--	20	+	8124308	8124378	UGAGAGACAUACUUCUUUAUAUGCCCAUAUGAACCUGGCAAUCUAUGGAAUGUAAAGAAGUAUGUAUUUCA	--	--	1458.28	2042.23	4146.71	1429.51	1839.5	1442.7
gga-miR-6570-3p	--	AGAGGAGAGCCTGTGGGCCAGA	--	1	+	186317303	186317402	AAAACCCUGGUUUGGAUUAAGGACCCACUGGAUCUGCAUCUUCCAAACUUGGGAGAGGAGAGCCUGUGGGCCAGAAAUCCCACCAGCACUGCACCAUGCC	--	--	0.0936986	0.0485009	0.178108	0.205207	0.0878022	0
gga-miR-1774	--	CCCCTGCTGAGGTTCTGCTTC	--	28	+	1464724	1464802	GGGAAUCUAACCCGUAAAGCAGGGGCGCCAGCAGGAGGUGCUUGUUCUCAUGUCUGCCCCUGCUGAGGUUCUGCUUCUC	--	--	0.843288	0.582011	0.578851	0.902911	0.526813	0.790232
gga-miR-6592-3p	--	AGCGTCTCCCGCCTGACGGCC	--	19	+	3356754	3356863	GAGGAGCGCCUGAGCCGCGGCGACGAGGCCGUCAGCCUGGAGCAGUUCUGCGAGGUGCUGGAGAGCGUCUCCCGCCUGACGGCCGGGUCCCGCGGGGAGAGCGAGGAGGU	--	--	0	0	0.044527	0.0410414	0	0
gga-miR-1570	--	GAAGGGTGTGCAGAAGAATGTGA	--	7	+	16772506	16772605	GGCAUCCCUGAGCGCUCUCUUCAUUUUUCUUCAUCUCCUACUGCUAUGUGACACACAUCAGAAGGGUGUGCAGAAGAAUGUGAGAGAAGCACAUCUAUCC	--	--	0	0	0	0	0.0439011	0
gga-miR-1743	--	TGGAATGCAGCAATTATCACCT	--	1	+	158057107	158057209	AAAGUAGGCUCCACUGUGUUAAUCCUCUUGGAAUGCAGCAAUUAUCACCUACCAUAUAGGUGUUAAGUGCUGAAUUUCAAAGGGAUUAUCACUUUCCUCCUUU	--	--	0.140548	0	0	0.0820828	0.131703	0.0439018
gga-miR-1397-5p	--	TGCATTGCGACGGGTTATATCA	--	1	+	128273775	128273879	AGCUGUUGACUGAAUGCGAUGUGUGCAUUGCAUUGCGACGGGUUAUAUCACUAAUCGUAACAUGAUGUAACCCAACGCAGCAUGAUGUAAGCGUCGUGAAACGUU	--	--	0.749589	1.16402	0.400743	0.984994	0.746318	0.74633
gga-miR-12250-5p	--	AGGGGATGGAGCCGAGTGCCACA	--	24	+	5139058	5139119	GCAGGGGAUGGAGCCGAGUGCCACAGCUGACCCCACACCACGUGCUCUGCUCUCUCCCCAGC	--	--	0	0	0	0	0	0.0439018
gga-miR-12249-5p	--	GTGAGTAATGGGAGAGGGTCC	--	24	+	480705	480767	GUGAGUAAUGGGAGAGGGUCCCUGGGGCACCUCGGCCAGGACCCCAUCCCUCAGCCUCACCCC	--	--	0	0.242505	0.178108	0.0820828	0.0439011	0
gga-miR-7441-3p	--	ATGTTGGGATCCTCTTCTGCA	--	17	+	2437879	2437941	CUGAGGAGGGUUUGUAACAUGGGGAGAAGGUGAAGGUGACUCAUGUUGGGAUCCUCUUCUGCA	--	--	0.187397	0.0485009	0	0.0820828	0.0878022	0.219509
gga-miR-21-3p	--	CAACAACAGTCGGTAGGCTGTC	--	19	+	7513411	7513507	UGUACCAUCCUGUCGGAUAGCUUAUCAGACUGAUGUUGACUGUUGGAUCUCAUGGCAACAACAGUCGGUAGGCUGUCUGACAUUUUGGUAUCUCUCA	--	--	1.87397	2.91006	3.02783	3.07811	3.38038	3.55604
gga-miR-6640-5p	--	TCTGGAATTGTAGTAGAGTGTAT	--	3	+	22294308	22294417	AAUGUUGGUAAUUAUUUUAUCUGGAAUUGUAGUAGAGUGUAUUAUUAUGGCAUGUGCCUAAUGGCUCUACUGCUUUCUUGUCAGGUGAUAUGAAGGACGACACGACGGAC	--	--	0.0936986	0.194004	0.044527	0	0	0.0439018
gga-miR-193a-5p	--	TGGGTCTTTGCGGGCGAGATGA	--	18	+	6417109	6417185	AGCUGAGGGCUGGGUCUUUGCGGGCGAGAUGAGAGGUUCGUGUCUUCAACUGGCCUACAAAGUCCCAGUUCUCGGCU	--	--	69.7586	71.9269	65.8999	73.3	66.6419	70.2867
gga-miR-12295-3p	--	CGCTGCCCGCCCCATCCCGACC	--	Z	+	34597613	34597671	AACGGGACGGGGCGGGACGGCGCUCCUGCUGCCCUGCGCUGCCCGCCCCAUCCCGACCC	--	--	0.0936986	0	0.133581	0	0	0.0439018
gga-miR-1553-3p	--	TGTGGTGGGAGGACAGTGATGT	--	7	+	23744568	23744672	GAGGACCAGUUGGCAGCUCUCACACAGUCCUGUCCUGUCUACCUACUGUCUGUCCUGUCCUGUGGUGGGAGGACAGUGAUGUGGGAGAGGGCCACUUUCAGCUUU	--	--	0.421644	0.388007	0.133581	0.28729	0.614615	0.526821
gga-miR-3536	--	CTGCATACGAGTAGACCCTTTC	--	25	+	2902463	2902540	GCUAUGCUGCAUACGAGUAGACCCUUUCUGACUCUGCCUGUAGUCGUAAAGGGGGGACAAUGUAUGCAACAGCAAAGC	--	--	5.90301	6.54763	8.01486	10.2604	8.51681	8.69255
gga-miR-12224-5p	--	AACAGTGGAATGCACCTAGCTGA	--	14	+	4400579	4400640	AACAGUGGAAUGCACCUAGCUGAGAUGGUGGGCUUUCUCUGUUAGGUGUCUUCCACAGGGCA	--	--	0	0	0	0	0.0439011	0
gga-miR-3525	--	CAGCCATTCTGCGATTCTGTGA	--	1	+	107174363	107174446	GUCUCUUUCAGCCUCAGCCAUUCUGCGAUUCUGUGAUAACUUUUAGAAUCAGAGAAUCAUAGAAUGGUCCGGGUUGGUAGGGAC	--	--	3.3263	3.49207	3.87385	3.24227	4.39011	3.02922
gga-miR-27b-5p	--	AGAGCTTAGCTGATTGGTGAACA	--	Z	+	41660862	41660958	ACCUCUCUGGUGAGGUGCAGAGCUUAGCUGAUUGGUGAACAGUGAUUGUUUCCCUCUUUGUUCACAGUGGCUAAGUUCUGCACCUGAAGAGAAGGUG	--	--	16.7252	18.7699	16.1188	23.1884	19.3604	21.2924
gga-miR-2184a-5p	--	AACAGTAAGAGTTGATGTGCGG	--	19	+	5662689	5662744	AACAGUAAGAGUUGAUGUGCGGCGAACGCAGCCUGCAUGUGAGCUCCUACUGCCGC	--	--	10.1195	9.50618	9.84046	13.7899	11.6777	11.0632
gga-miR-155	--	TTAATGCTAATCGTGATAGGGG	--	1	+	103797403	103797465	UGUUAAUGCUAAUCGUGAUAGGGGUUUUUACCUCUGAAUGACUCCUACAUGUUAGCAUUAACA	--	--	7.82384	9.11817	4.18554	2.83186	4.96082	1.40486
gga-miR-34c-5p	--	AGGCAGTGTAGTTAGCTGATTGC	--	24	+	5569576	5569649	AGCCUGGUUACCAGGCAGUGUAGUUAGCUGAUUGCCACCAGGACCAAUCACUAACCACACAGCCAGGUAAAAAG	--	--	17.2405	15.2778	16.5195	19.4947	18.0433	21.5997
gga-miR-29b-3p	--	TAGCACCATTTGAAATCAGTGTT	--	1	+	4029386	4029466	CCUCAGGAAGCUGGUUUCAUAUGGUGGUUUAGAUUUAACUAUUCAUUGUCUAGCACCAUUUGAAAUCAGUGUUCUUGGAGG	--	--	2.48301	2.52205	2.89425	2.50353	2.10725	2.5902
gga-miR-133a-3p	--	TTGGTCCCCTTCAACCAGCTGT	--	20	+	8135529	8135624	GUGAGGCCAAAUGCUUUGCUAAAGCUGGUAAAAUGGAACCAAAUCAACUGUUCAAUGGAUUUGGUCCCCUUCAACCAGCUGUAGCUGUGCAUUGAU	--	--	37.9011	64.5547	137.811	37.0604	47.5449	32.619
gga-miR-6670-5p	--	GTGGAATGATGATCTATATTCTGAGT	--	3	+	79593677	79593786	GAUGUGUUUGUCUUGAUUAGUGGAAUGAUGAUCUAUAUUCUGAGUUAAUUUUUCUUAGUUGUGUAGAUGCGUAUAUUUCAUAAGGUACAAAGAUGAGUUUUUCAUUGAAU	--	--	4.96603	6.40212	3.33952	3.77581	3.81939	4.65359
gga-miR-10a-3p	--	AAATTCGTATCTAGGGGAATA	--	27	+	6242489	6242562	CUAUAUGUACCCUGUAGAUCCGAAUUUGUGUAAAGGAAGUUGGGUCACAAAUUCGUAUCUAGGGGAAUAUGUAG	--	--	122.745	158.404	186.524	148.693	164.541	127.14
gga-miR-6642-3p	--	CGGGCGGCCGTCGGGGAAAGCGG	--	5	+	13870257	13870357	ACACGACGCCGCCGCCGCGUUCCCCGACGGCCGAGCGGGCCGCUCCGCGGGGCGGGCGGCCGUCGGGGAAAGCGGAGGCGGUAGCGGCUAUUCCUCCGCCU	--	--	0	0.0485009	0.044527	0.0820828	0.0439011	0.0439018
gga-miR-6620-5p	--	AGAGATGGAAGCGCTGCGCACGG	--	25	+	394100	394209	GCAGCGCAGCCGACCCCGCAGAGAUGGAAGCGCUGCGCACGGUGCGUAGCAAAGAGGGGAUCUGGGUACCGUGUGCGCCCCGUCGGGGUCCCUGAGCCCAUCCCAUCCCC	--	--	0.140548	0	0	0	0	0
gga-miR-1709	--	TGGAATGATGAGTGCACTGACT	--	1	+	182304605	182304686	CUAGGCUGGAAUGAUGAGUGCACUGACUGGCCAUCUGGUGCUCAUGGCAGGUUGGUCAGUUGUCUGUUAUCUCUCAAAAUGG	--	--	1.07753	0.630512	0.311689	0.492497	0.482912	0.307312
gga-miR-3530-5p	--	GCTCTGCTCGCACCATTGTGG	--	7	+	25267461	25267549	GAAGGCUGAUGCGCCCGCUCUGCUCGCACCAUUGUGGCGGCCGAACAAAGCACAAUGGUGUGAGCUGGGAUGGGCGCUGGCCGGCCCUC	--	--	1.03069	1.11552	0.89054	0.697704	0.79022	0.570723
gga-miR-12249-3p	--	ACCCCATCCCTCAGCCTCACCCC	--	24	+	480705	480767	GUGAGUAAUGGGAGAGGGUCCCUGGGGCACCUCGGCCAGGACCCCAUCCCUCAGCCUCACCCC	--	--	0.0936986	0.145503	0.089054	0	0	0
gga-miR-1563	--	GCACATGATGAGGAAGCACTGAAA	--	12	+	1170811	1170881	AGCCCAAAGCACAUGAUGAGGAAGCACUGAAACUGACUCUGUAUGAAGUGCAUUCAAUCCAAUGCUGAGCU	--	--	2.90466	2.57055	3.69574	2.74978	1.79994	2.10729
gga-miR-132b-5p	--	ACCATGGCTGTAGACTGTTAC	--	19	+	5662869	5662927	ACCAUGGCUGUAGACUGUUACCCCCCCAGCAGCACAGUAACAAUCUAAAGCCACGGUCG	--	--	0.187397	0.145503	0	0.123124	0.0878022	0.219509
gga-miR-1744-5p	--	TGCTCTGTTGAACTCAAAAGCT	--	10	+	10362842	10362930	GGAGUCAGGACCCAGUGCUGCUCUGUUGAACUCAAAAGCUGAACCCUGUUGUUGACUUCAACAGGAGCAAGACUGAGCCCUGAUUUUCC	--	--	0.234247	0	0.089054	0.0410414	0.131703	0.0878035
gga-miR-1451-5p	--	TCGCACAGGAGCAAGTTACCGC	--	3	+	75994558	75994667	CAGAGCAAGCGCAGGAGCUGCUGCCUCGCACAGGAGCAAGUUACCGCGUUCAGCUCGCCUGCCGUAACUCGCUGCUGUGAGAGGCAGCGGCUCCUGGCUCUCCCUGCUCC	--	--	41.5553	44.6694	43.5029	44.5299	38.5013	38.8531
gga-miR-12290-3p	--	TGACCCCCACGTGCCCCCCAG	--	30	+	1338285	1338338	UGGGGGUGCCGUUGGGGUCAGUGGGGUGCGGCUGACCCCCACGUGCCCCCCAGG	--	--	0	0	0	0	0.0439011	0
gga-miR-6648-3p	--	TCCGGCATTCTGAACGCTCCT	--	15	+	6946790	6946888	GCGGAGGCUACGGGGGUAAAGGAGCGUUCAGAAUGCCGGUGGCAGCUGCCCUCCGGCAUUCUGAACGCUCCUUUACGCAGGGUGAUUGGGGCUGGUGAG	--	--	1.35863	2.08554	1.1577	1.51853	1.36093	1.40486
gga-miR-12221-5p	--	GCGGACAAAGGACGATGGCAC	--	12	+	5715220	5715298	AGCGGACAAAGGACGAUGGCACACGAAGUGCUCUGGAGGCCUGUGACAGUUCAUGUGCCAUCGUCCUUUGUCCGCUGCU	--	--	0.187397	0.0485009	0.311689	0.0410414	0.0878022	0
gga-miR-1647	--	TCTCTGCCTGAGGGGTACTCT	--	28	+	2359895	2360001	CCACAUAGUGGCUCUCGGACCCUCUUUUCUCUGCCUGAGGGGUACUCUGAGGUACAAGAGUUGCCCCGUAGGCAUGGCAAGGUGGUUCUGAGCAGCACAGCUAGAGG	--	--	0.234247	0.436508	0.400743	0.246249	0	0.351214
gga-miR-1552-5p	--	TTAGTGCGCGGTAAGCTAGGGTG	--	1	+	134912417	134912499	UCUACAUGGGGAGGUUAGUGCGCGGUAAGCUAGGGUGUGAGCUGACAGCACGCUAGCUGCUCUGCACUGACUGCCCCUGUGGA	--	--	78.9411	73.8184	60.4676	75.311	76.4318	86.3548
gga-miR-12262-5p	--	TTGTCACAGACCCTGCTAAAGA	--	11	+	856265	856299	UUGUCACAGACCCUGCUAAAGAGUCUGUCCCCUUCUUUAGCAGGGUCUGUGGUGAUA	--	--	0	0	0	0	0	0.175607
gga-miR-215-5p	--	ATGACCTATGAATTGACAGAC	--	3	+	18902895	18902999	UCAGUAAGAACUGGUGUCCAGGAAAAUGACCUAUGAAUUGACAGACUGCUUUCAAAAUGUGCCUGUCAUUUCUAUAGGCCAAUAUUCUGUGCACUUUUCCUACUU	--	--	88.4047	56.7946	102.768	43.8322	82.9731	55.404
gga-miR-1697	--	CTCTCATGGGACTGTGTGCAGC	--	19	+	7387616	7387694	GACAGAGGGGAGUCAUGCAGGAACAUGGGCAGCAGUCACUCCCUGCUCUCAUGGGACUGUGUGCAGCUUCUCCCAUGUC	--	--	0	0.0485009	0.044527	0	0.0878022	0.175607
gga-miR-101-1-5p	--	TCGGTTATCATGGTACCGGTGCT	--	Z	+	27510587	27510665	ACUAUCCUUUUUCGGUUAUCAUGGUACCGGUGCUGUAUACGUGAAAGGUACAGUACUGUGAUAACUGAAGAAUGGUGGU	--	--	0.374795	0.436508	0.623378	0.533538	0.263407	0.307312
gga-miR-12215-5p	--	GGCGGCGGAGGGAGGAGGAGGCGGT	--	1	+	194436261	194436325	GGCGGCGGAGGGAGGAGGAGGCGGUGGCUGCGCCAUGAGUUUUCUCAAGCGGUUCCCGCCGCCGG	--	--	0	0	0	0.0410414	0	0
gga-miR-6549-5p	--	AGCCTTCTGTTGTGCATCTGAGA	--	8	+	24838736	24838848	CUCUUGGAUGGUGGCCUUGAGCCUUCUGUUGUGCAUCUGAGAUUCCAGACAGCUUUUGUCAGAUCACAGCUGUAAGCAGAAGGCACCCAAGGCUGCCUUCCUAUGCACCAGUG	--	--	0.234247	0.53351	2.04824	2.42144	2.67797	1.22925
gga-miR-194	--	TGTAACAGCAACTCCATGTGGA	--	3	+	18902589	18902663	UGGUGCUCUCAUAUGUAACAGCAACUCCAUGUGGACUACACUGACUUCCAGUGGAGAUGCUGUUACUUUUGAUAG	--	--	8.43288	5.67461	9.61783	3.07811	6.14615	4.30237
gga-miR-221-3p	--	AGCTACATTGTCTGCTGGGTTTC	--	1	+	111967038	111967136	GACUGUCCAGGUUUGGGGCAUGAACCUGGCAUACAAUGUAGAUUUCUGUGUUUGUUAAGCAACAGCUACAUUGUCUGCUGGGUUUCCAGCUGCCUGGAA	--	--	1527.8	1653.3	1631.16	1482.95	1439.82	1574.01
gga-miR-12278-5p	--	ATCCTTCAAGTGCCTGATAACA	--	5	+	9262500	9262561	AUCCUUCAAGUGCCUGAUAACAGUAGGCUUUCAGAGUGUACUGAUCAGCCACUUGAGGGAGG	--	--	0	0.0485009	0	0.205207	0.0439011	0.131705
gga-miR-6566-3p	--	CAGCAGGCCATGGGGTCGCAG	--	16	+	1900139	1900242	GAGCCGUCUUUGUCCGAGAAGCGGUUGAGGCCCGAUGUGUCAUUCCUGGAUUUUCUCUGUCAUCCAGCAGGCCAUGGGGUCGCAGCUGCUCCGGACGUUCUGCA	--	--	0	0	0.044527	0.0410414	0	0
gga-miR-6569-5p	--	GCCCTGTTGGACTAACGGCGTTG	--	13	+	5450751	5450854	GAGGCCUGGGGCACUCGCGGCCCUGUUGGACUAACGGCGUUGCUGUUCUGCAGUAACUUGAGUUACGGACUGGGGUUGGAGCCGCCUUUUCUGGGUUAGAGGAU	--	--	0	0	0.044527	0	0	0
gga-miR-6545-3p	--	AGCTGGAGCTGATTTTCTGGCA	--	2	+	71621944	71622050	AGGUUUCUCUUGUUCAAUUGGCAGAAAAGGGCUGCAGCUUCAUCUGAAGUACUGGAGAGAAGCUGGAGCUGAUUUUCUGGCAAUGACAGCAUGACAGAGCAUCCGGC	--	--	0	0	0	0.0410414	0.0439011	0
gga-miR-184-3p	--	TGGACGGAGAACTGATAAGGGT	--	10	+	20409572	20409645	CCGCUCUCACCCCCUUAUCACUUUUCCAGCCCAGCUUCUUCGCUCUGACUGUUGGACGGAGAACUGAUAAGGGU	--	--	911.922	989.661	586.153	1202.39	1070.57	1143.29
gga-miR-202-3p	--	AGAGGCATAGAGCATGGGAAAA	--	6	+	22456105	22456193	GCUCGUUGUUCCUUUUUCCUAUGCAUAUACUUCUUUGAGAGUUUGAUCUAAAGAGGCAUAGAGCAUGGGAAAAUGGGGCGACUGAGGUA	--	--	0	0	0	0	0.0439011	0
gga-miR-148b-3p	--	TCAGTGCATCACAGAACTTGGT	--	33	+	7737150	7737210	CGAGGUUCUGUCCUACACUCCGGCUGUGGCUAUGGGCAGUCAGUGCAUCACAGAACUUGGU	--	--	3174.79	3095.04	3411.17	2925.56	2918.02	2972.15
gga-miR-12247-5p	--	CCCGGGGTGGGCACGCTGTACG	--	22	+	5203946	5204005	CCCGGGGUGGGCACGCUGUACGGCACGCAGCGGCUGCCCCAGCACGCCUACCCCGGGCCC	--	--	0.562192	0.776015	0.846013	0.533538	0.658516	0.965839
gga-miR-1740-5p	--	TGTAGTTTAAGAGGATAGGTCTT	--	3	+	3796289	3796390	UGAUGUGGAAUUACCCUGAGUAAUGUAGUUUAAGAGGAUAGGUCUUAAGUUUUACAGUGUGAUCAUCCAAUUAAACCACAAAACUCAGGGAAAACUAAAGCA	--	--	0.140548	0.582011	0.133581	0.28729	0.658516	0.614625
gga-miR-12264-5p	--	CCTACTGCTAGGTTTGCCCTTA	--	3	+	87056422	87056484	ACCUACUGCUAGGUUUGCCCUUAAACUAUGGUGCUCUCUUAAUGGCUGUUCUAGCAGUAGAUC	--	--	0	0	0	0	0	0.0439018
gga-miR-1769-3p	--	AGTGTGAAATCTGCCTGAAAGTC	--	15	+	2528864	2528966	GUGUGGAUGUGUGUGGUGUGGCCUUCAGGCUUUUCUCACACCUGUUGAGCUCUGCAGUCAAGUGUGAAAUCUGCCUGAAAGUCAUUCCAACAUUCAAAUAUGC	--	--	11.5718	6.59613	8.59371	13.2153	13.2581	18.6144
gga-miR-1702	--	ATTGCATTCAGAGCGAGCTGT	--	13	+	2828076	2828159	ACUCCAGGAGCCACAGUUUGCUCUGUGUGUGCAUCUGGGUGCUGACAAGCCAUUGCAUUCAGAGCGAGCUGUUUGCACUGGUGU	--	--	0.0468493	0	0	0.0820828	0	0
gga-miR-181b-1-3p	--	TCACTGAACAATGAATGCAAC	--	8	+	2387329	2387417	AAAAGGUCACAAUCAACAUUCAUUGCUGUCGGUGGGUUUAACUAUGUGGACAAGCUCACUGAACAAUGAAUGCAACUGUGGCCCCACAU	--	--	11.6655	10.7187	11.3989	13.1333	9.78994	9.65839
gga-miR-133a-5p	--	AGCTGGTAAAATGGAACCAAATC	--	20	+	8135529	8135624	GUGAGGCCAAAUGCUUUGCUAAAGCUGGUAAAAUGGAACCAAAUCAACUGUUCAAUGGAUUUGGUCCCCUUCAACCAGCUGUAGCUGUGCAUUGAU	--	--	1.54603	3.54057	4.67533	1.35437	2.54626	1.53656
gga-miR-1717	--	ACTCTCTAACCTGACAGAAAACT	--	3	+	33879846	33879946	GCUGAGAGCAGGCCCGGUUAACUCUCUAACCUGACAGAAAACUAUCUACUUUUCUAGGUUAGUUUCCUGUCUGCUCAGGGAGUUACCUUGGCUUGUAAAGU	--	--	0.327945	0.0485009	0.178108	0.28729	0.39511	0.263411
gga-miR-7443-3p	--	TCCCTTGGGCTGCAGCACCCTCC	--	18	+	9722497	9722555	UGGUGGCUGCCCUCAGGGAGAGCCGAUUCCCCCAGCUCCCUUGGGCUGCAGCACCCUCC	--	--	0.234247	0.0485009	0.133581	0.0820828	0	0

## Sheet: Novel miRNAs
Table S3c. 968 novel miRNAs.
miRNA	score_total	mature_sequence	star_sequence	GenomeID	strand	start	end	pre_seq	hairpin_stru	hairpin_energy	CH1	CH2	CH3	TC1	TC2	TC3
novel_miR_80	1.3	aacagcaccgugccacguugg	aacgcugggaaguguuguugu	2	+	4068418	4068528	agcaaauccuuccucuccccaacagcaccgugccacguuggcugugcuuuggccaacgcugggaaguguuguugugcauugggagggaacagucccaauugcgacacaggc	......((((((((....((((((((((..(.((((((((((((.....))))))))).))).).))))))))).)....))))))))...(((........)))......	-42.8	0.281096	0.0485009	0	0.0410414	0	0.0878035
novel_miR_535	2.3	uauugcacuugucccggccugu	guggggauuuguugcauuacuu	4	-	3967337	3967447	ccgaagaugccuugcgcugguuccuccguggguggggauuuguugcauuacuuguagcuguguguagaguauugcacuugucccggccuguggaggaaaggaggacugguc	........(((.(.(.((..(((((((((((((.(((((..((.(((.(((((...((...))...))))).)))))..))))).))))))))))))).)).).)..))).	-45	3731.88	3545.03	3059.05	3717.37	3571.57	3840.44
novel_miR_697	2.5	auguagggcgaaaagccaugggc	cuauggcuuuuuauuccuauguga	26	-	2124446	2124556	cuuauccucgguaagcccucugcuguggucuauggcuuuuuauuccuaugugauugcuuuuccuaacucauguagggcgaaaagccaugggcuacucaggggagggacucc	((((((...))))))((((((.(((((((((((((((((((..((((((((((..............)))))))))).)))))))))))))))))..)).)))))).....	-50.7	0.234247	0.436508	0.178108	0.246249	0.921923	0.395116
novel_miR_183	17.4	ccacccgagcucugucccugcaga	ugcugggagggcucugugcggc	28	-	1506539	1506652	cgggcggugcggugcugugggugcugggagggcucugugcggcucugugcggcucugugcggcucugggcccacccgagcucugucccugcagaaauauuacccgccggacuuc	....(((((.((((.(((...(((.((((((((((.(((.(((((.(.((.((.....)).)).).))))))))..))))))..)))).)))...))).)))))))))......	-54.7	0.234247	0.339506	0.267162	0.164166	0.0439011	0.0878035
novel_miR_317	2.3	ugagugcagaacuggacgugg	gaguucagaacuggauucgga	33	-	3245505	3245615	agcgcagaacuggacguggaacugaguguggaucugaguucagaacuggauucggaaguggcugcagaacugagugcagaacuggacguggaucugcauucagaucagacc	..(((..........)))((.(((((((((((((((.((((((..(((.((((((...((....))...)))))).)))..)))))).))))))))))))))).)).....	-44.4	1.68658	1.45503	1.24676	1.14916	1.36093	1.05364
novel_miR_533	0.4	gccugaccuggccuugcccu	ugcuuggcagggucuggccu	26	-	5366167	5366276	gccuagcauugccuugcuuggcagggucuggccuugcauugccuggccuuuccuggccuugcccugccuggccugaccuggccuugcccuaacuugccuugucuugcccu	.....(((.......((..(((.(((((.((((..(((..((..((((......))))..))..)))..)))).))))).)))..)).......))).............	-45.6	0	0	0	0.205207	0	0
novel_miR_33	0.7	aaauguuacugaugcugaag	uuagcauuaguggcagguga	3	+	94183849	94183956	ggcaaccaaauaauuuuaccaaauguuacugaugcugaagcgggaauauauguauguguaacuuagaaacaaauuucacauuuuagcauuaguggcaggugagcugca	..............((((((...(((((((((((((((((.((((((...(((.(.((.....)).).))).))))).).))))))))))))))))))))))).....	-29.5	0.140548	0.145503	0.044527	0.246249	0.0878022	0.0878035
novel_miR_776	643.7	agagugucuguuaccugaccac	ugucagauagcugauacuccgc	3	-	81564080	81564191	guuaaccucccaaauucaagagacugauuucaguuugucagauagcugauacuccgcuuccuuauuauucagagugucuguuaccugaccacacugggaucuaugcaaacau	.........................(((((((((..(((((.((((.(((((((.................))))))).)))).)))))...)))))))))...........	-27.6	8.33918	7.76015	6.14472	11.7378	10.5363	10.4047
novel_miR_306	390.4	uucaguuaucaguggaguuugg	uggcuccagucuuaacuacagg	3	-	79223748	79223859	cuugcuugcuugagcauaaguucugcccuucuggcuccagucuuaacuacaggcaaugcugacauucuccuucaguuaucaguggaguuuggagugcuagagacauggagcu	..(((((....)))))..((((((((.((((.(((((((.(..(((((..(((.((((....))))..)))..)))))..).))))))).)))).)).........))))))	-32	4.35699	5.3351	5.03155	5.78684	6.80467	6.58527
novel_miR_309	21.1	acagaaugucucuuugaaaacc	auucaaagggcaguccgcuuggc	3	-	59946550	59946662	ccuuucaggggguucuggcaauucaaagggcaguccgcuuggcuggagcaaugcaaaacagaaugucucuuugaaaacccgguacguccuaagcaacaugagagggcacuaug	((((((((((.((.((((...(((((((((((.((......((.........))......)).)))).)))))))...)))).)).))).........)))))))........	-32.1	0.234247	0.0970019	0.222635	0.0410414	0.0439011	0.263411
novel_miR_902	2.3	ucagcagugugcugcgugugu	uggagcucagugguguaggugc	6	-	33207752	33207862	cauuacugccccaggggccuucagcagugugcugcgugugucugugcuguaauggggcacacguggagcucagugguguaggugcuugugguguguacaccuacaggaauu	...(((((((.((((.((((.((.((.((.(((((((((((((...........))))))))))..))).)).)).)).)))).)))).)))).)))..((....))....	-44.2	0.140548	0	0.044527	0.369373	0.0878022	0.439018
novel_miR_16	2.7	cugagugacugaucccugcagg	ugcaggggggucuggucagcuugggg	30	-	423465	423575	auccgcugcaagguggguuggggggcugcaggggggucuggucagcuugggggucgcaucccggcccccccugagugacugaucccugcaggaugaugaguucacccaccu	(((((((....))))))).(((((((((((((((((((.(.((((...((((((((.....)))))))).)))).)))))..)))))))))..(((.....)))))).)))	-55.6	2.24877	2.18254	2.84973	3.07811	2.23896	1.18535
novel_miR_652	51.4	ugaggucuuaccagcacugagu	ccugugcugaggacuccacaucugg	11	+	18562846	18562954	guguccacacuccaacaggcccaccucuguccugugcugaggacuccacaucuggacgcagugcuccaggugaggucuuaccagcacugaguagagguccgccauccuc	(((....))).......(((..(((((((((..((((((((((((...((((((((.((...)))))))))).))))))..)))))).)).)))))))..)))......	-43.8	0.281096	0.436508	0.44527	0.28729	0.0878022	0.439018
novel_miR_320	106.6	cgcgccgauugucuccuccgggca	cccggaggagcccggcgcugc	2	+	61066412	61066521	acguuacgaagccgcguuacgccccgcgccgugcccggaggagcccggcgcugccuuucuacgcggccgccgcgccgauugucuccuccgggcacgggggauguccgcgg	...........(((((..(((.(((...((((((((((((((((.((((((.(((.........)))....))))))...).)))))))))))))))))).))).)))))	-62.4	1.17123	0.921518	0.267162	1.35437	0.263407	4.74139
novel_miR_409	73.4	ugcggaggucgggcagcuucagc	cgggagcucucggccggccgcg	27	+	7166397	7166509	ggaguggagguuguugagggugcggaggucgggcagcuucagcagcaguuuggugaagcgggagcucucggccggccgcgucuucugcaccagagcccgcagcgcgcggauca	...((...(((.((.((((((((((.(((((((.((((((.((..((......))..)).)))))))))))))..)))))))))).)))))...))((((.....))))....	-50.7	0.749589	0.921518	1.11317	0.902911	1.44874	1.22925
novel_miR_126	1.1	acuucucuggacaaccuguuc	ccaggugcccagagccccau	1	+	85421502	85421609	cuuggccaggugcccagagccccauccagccugaccuuaaauguuucucgggauggggcauccaccacuucucuggacaaccuguucagugccucaccacucucacug	..(((.((((((.((((((((((((((.....(((.......))).....)))))))))............))))).).))))).)))(((......)))........	-34.2	0.0468493	0	0	0.0820828	0.219505	0.219509
novel_miR_773	2.1	uagcagcgcugugcucaccc	caccccauagcagcgcugug	25	+	1985716	1985829	ccaccccauagcagcgcugugcucaccccauagcagugcugugcucaccccauagcagugccugaccccauagcagugcugugcucaccccauagcagcgcugugcucacccca	......((((((.((((((((.......(((((((.(((((((.(((...(((....)))..)))...))))))).))))))).......)))))).)))))))).........	-40.3	0.421644	0.242505	0.578851	0.28729	0.526813	0.307312
novel_miR_1	2.4	ucucuauggggucucugugg	augggggcucuauggggcacu	KZ626839.1	-	543076	543190	acugugggucucuaugggggcucuauggggcacuuugggguuuggggggcucuaugggguucuauggggcacuuugggucucuauggggucucugugggguuugggggucucuau	(((.(.((.(((((((((((((((((((((.((((........((((.(((((((((....))))))))).))))))))))))))))))))))))))))).)).).)))......	-47.2	0.234247	0.0970019	0.133581	0.205207	0.439011	0.131705
novel_miR_650	1478.7	uagcagcacauaaugguuugu	caggccauauugugcugccuca	1	-	170717735	170717845	guagacaccuuggcauaacguagcagcacauaaugguuuguggguuuugaaaaggugcaggccauauugugcugccucaaaaauacaaggauuucaucauccugaagagaa	.......(((((.......(..((((((((..((((((((((.............))))))))))..))))))))..).......))))).((((.(((...))).)))).	-34.2	20.6606	23.4259	17.2319	20.3565	18.219	21.1607
novel_miR_381	0.3	cgagcuacagugcuucaucuc	gaugcagcacugcaccuuggg	13	+	9212720	9212829	ggcacaguuccucccuucccgagcuacagugcuucaucucagacucccaauugaccagagaugcagcacugcaccuugggcugggagacauggaggagcccccagcugcu	....((((..(((((..((((((...(((((((.((((((.................)))))).)))))))...))))))..)))))...(((.((...)))))))))..	-44	0.0936986	0.0485009	0.178108	0	0.0439011	0
novel_miR_794	14.4	ugcuuucuguaaugcugaugu	aacauuauugcagaaagcacg	2	-	48887807	48887917	uguuaguaaugauagaacaaagcucuuuacaacauuauugcagaaagcacgguugaaacuuaaauucuugugcuuucuguaaugcugauguaaaagcuuugugcauucuca	..........((....((((((((.((((((.((.(((((((((((((((((..(((.......)))))))))))))))))))).)).))))))))))))))....))...	-39.1	0	0.145503	0.178108	0.123124	0.131703	0.351214
novel_miR_29	0	uucugguaucuguggcacuuggu	augguguucagcugucagaaaac	9	+	13629074	13629185	auauucagagacauuucagauucugguaucuguggcacuugguguaucuagaguaaaaccaaugguguucagcugucagaaaacugaaaugaauacauuuacccuuggcgua	...........((((((((.((((((((.(((.((((((((((..............))))..))))))))).))))))))..)))))))).....................	-27.3	0	0.194004	0.089054	0.123124	0	0.131705
novel_miR_640	59.7	uccguacugguccauacugguc	uccguacugguccguacugguc	8	+	220797	220908	ucccuacugcuccguacugguccguacugguccauacugguuuguacuggucccuacuggucccuaccggucccuacugguccguacugguccauacuggucccuacuggcc	.((........(((((.(((.((((((.((.(((.((((((..(.((((((....)))))).)..))))))......))).)))))).)).)))))).))........))..	-31.5	0	0	0	0.779787	0.263407	0.526821
novel_miR_502	2.9	ccucaggggauggaggcagcgaug	ccgcgucuccuucuccagagc	5	-	8142863	8142973	gcucgcgcugugcagcccccggccgcgcgcagccccucaggggauggaggcagcgaugccgcucuccccgccgcgucuccuucuccagagccgccgccgccgccgcuucgu	(((.((.....)))))...((((.(((.((.((..(((.(((((.((((((.(((..((.(......).))))))))))).))))).)))..)).))))).))))......	-47.1	0.140548	0.0485009	0.044527	0	0	0
novel_miR_190	2.2	aaugcuuacuugucuggaca	cccagacaaguugaguauuua	28	+	4023845	4023953	cuucccuucuccgcugugggucagcccagacaaguugaguauuuauucuccuccugccaauggaauguguaaugcuuacuugucuggacagacgcacuggggauuagug	.....((..(((.(.(((.(((.(.((((((((((.((((((((((..(((..........)))..))).))))))))))))))))).).))).))).).)))..))..	-42.5	0.0468493	0.0485009	0.044527	0.164166	0.0878022	0.175607
novel_miR_632	6.8	cugagugucacagaacuuugcu	caaaguucuguagugcacugacu	2	+	32120625	32120736	gagccgcuccgccgccgcagcccccggagacaaaguucuguagugcacugacugcuaucguaaccagagucugagugucacagaacuuugcuucaggagaccggauccuccu	......(((((..((....))...))))).(((((((((((...(((((((((..............))))..))))).)))))))))))....(((((........)))))	-35.9	0.140548	0.0485009	0.089054	0.205207	0.0878022	0.0439018
novel_miR_402	0.3	cugcgucuggccgggacuugugcu	cgcggggccaggaggucagag	13	+	2797707	2797820	ggcgcggggccaggaggucagaguggugggaugcggggucucugcugugugcugcgguuaggucacugcucugcgucuggccgggacuugugcugcacauggggcagggugugg	(((((((((((((.(.(.(((((((((((..(((((.(.(........)).)))))......)))))))))))).))))))).....))))))).(((((........))))).	-45.6	0.0936986	0	0	0.0820828	0	0.131705
novel_miR_349	0.6	aggcaagauguuggcauagcug	guuccuacagauggcuuuc	Z	-	78732035	78732146	augcauuaagagguuauaugguuccuacagauggcuuucuaacaaguucuuucaugcagagcuggaggggaggcaagauguuggcauagcuguuaaccuaaaaaccugcuau	..(((.....((((((.((((((((.(((....(((((((....((((((.......))))))....)))))))....))).))...)))))))))))).......)))...	-29.3	131.74	117.178	144.134	133.549	146.015	127.271
novel_miR_604	7.1	ccuuggucugguggagcugagc	cgcagcuccgccaccuccgagucg	16	-	2440857	2440968	gccgccuggccugcgacucggcccucagccgcagcuccgccaccuccgagucgcucugagccaacacagccuuggucugguggagcugagccuggggggaaggggaggauuc	(((....)))...(..(((..(((((((.(.(((((((((((...(((((..(((.((......)).))))))))..))))))))))).).)))))))...)))..).....	-51.5	0.0936986	0	0.089054	0.0820828	0.0439011	0
novel_miR_676	34.4	cgcuggggaugcuggcacgcuggc	cagcgugcgcuccaccccuggca	12	-	3553020	3553131	auccccuuuggccguggcgacgcuggggaugcuggcacgcuggcacgagacgugggcugacagcgugcgcuccaccccuggcagaugugaagaagaugccgcuggggaagcu	.(((((..(((((.(.(((.((((((((.((..(((((((((((.(........)))...)))))))).)..)).))))))).).))).).).....))))..)))))....	-43.8	0.281096	0.339506	0.267162	0.86187	0.702417	0.658527
novel_miR_834	62	guacccuguagacucgaauuugu	caaauucgucucuagggaau	33	+	7660042	7660153	agcccucccguccccuauauguacccuguagacucgaauuugugugagcgucuccgagucgcaaauucgucucuagggaauauaugggcgaugccagagccuugggaaguug	.((.((..((((.(((((((((.(((((.((((..(((((((((....((....))...))))))))))))).))))).))))))))).))))..)).))............	-41	0.374795	0.436508	0.222635	0.533538	0.482912	0.614625
novel_miR_98	1.5	cacaggaugguuuggguuggaagg	uucugaccaaaguccuugaa	4	-	3249087	3249202	ccaggaagcagugugacuucugaccaaaguccuugaaggcugugucuguguuggcugcaagcaguaauaugggaucauagacucacaggaugguuuggguuggaagggaccuuuaa	.........((.((..(((((((((...((((((((.(.((((((((((((((.(((....))))))))))))..))))).)))).)))))......)))))))))..))))....	-34.3	0.515343	0.291006	0.044527	0.246249	0.526813	0.263411
novel_miR_582	22.5	cuguguuaucuucugaucuuu	aagacgcagaagguagcauuuccu	7	+	11836626	11836736	gauaugccagugagauggggcuguguuaucuucugaucuuucugauuaggaauuaagacgcagaagguagcauuuccucaaaucaccuuugguugucuuugguggaacacu	((((.((((((((..(((((..(((((((((((((.(((((((.....)))...))))..)))))))))))))..)))))..))))...))))))))...((((...))))	-37.7	0.327945	0.582011	0.133581	0.246249	0.131703	0.395116
novel_miR_613	2.7	uuuccaaccuucgugauucuga	agaaucaugaagguugggaaag	4	-	88530685	88530792	ggauuccuagagcucuuuuccaaccuucgugauucugauucuucauuagggaucacagaaucaugaagguugggaaagagcucuaagauaaucaaguccaaccccaac	((((((.((((((((((((((((((((((((((((((((((((....)))))))..))))))))))))))))))))))))))))).)).......)))).........	-57.4	16.163	35.4542	15.8071	25.4046	15.3215	11.4145
novel_miR_489	1.8	uugguggcugcaugcucucagc	ugagggcagagcugcagccucacauuu	19	+	7515870	7515978	ggugacuuuuggaguucuugugugucauugagggcagagcugcagccucacauuucuucuuuuguuggacuugguggcugcaugcucucagcauucacaagaggcagcu	..............((((((((.((..(((((((((....(((((((.(.((..(((.........)))..))).)))))))))))))))).)).))))))))......	-37	11.9934	15.2293	17.1429	17.3195	8.82412	14.7949
novel_miR_795	2.4	uccagugauucacaccagcugu	agcugguguaagucagcagagc	Z	-	62996224	62996335	uuucuuccaaaucuugggccagaaucucagcugguguaagucagcagagcuccacugacauuauuagugcuccagugauucacaccagcugugaaucuggucuacugucuca	..............(((((((((.((.((((((((((.(((((...((((...(((((.....)))))))))...))))).)))))))))).)).)))))))))........	-47.4	0.187397	0.388007	0.044527	0.123124	0.0878022	0.0439018
novel_miR_868	0	aggaguccccaggcugugcuga	agcgcugccuacgggcuccucg	24	+	5234005	5234114	gaaccagugggguauggggaaggaguccccaggcugugcugaccccgcugccuccccagcgcugccuacgggcuccucguccgccccaaugacuucgcuuccuacuugcu	(((.((.((((((..(((..((((((((..((((.((((((...............)))))).))))..))))))))..))))))))).))..)))..............	-46	0.0468493	0.0970019	0	0	0.131703	0.0439018
novel_miR_511	0.6	ugggcugcaagagcacauugcu	cucugcuuuugaugcaucccagg	1	-	117904326	117904437	gaaagggcaggauaccuaccuugaccuucuggccacucugcuuuugaugcaucccaggauacaguuugcuuucugggcugcaagagcacauugcuggcucauauccaacuuc	..((((.((((........)))).))))..((((((..((((((...((((.(((((((..((...))..))))))).))))))))))....).))))).............	-34.1	0.0468493	0	0	0.0410414	0.0878022	0.0878035
novel_miR_665	0.2	uuggucagcuguuggucaacauu	uguuggucaaccgcuggucagcu	25	-	3415855	3415967	ggucagccauugguaaauguuuggucagcuguuggucaacauuuggucagccaucggucagcuguugguugacuuuggguugucuguuggucaaccgcuggucagcuuuuggu	.....((((..(((.......((((((((.(((((((((((...((.(((((...((((((((...))))))))...)))))))))))))))))).)))))))))))..))))	-41.3	0	0	0.089054	0	0.263407	0.0439018
novel_miR_829	2.1	uuucucugucaguggguaggaggc	uuccuacccauguggagaaaga	6	+	31164287	31164396	ccuuauugcugagacaauguugcuguaacugcuuccuacccauguggagaaagacgcuggucaugucugcuuucucugucaguggguaggaggcagcuucagagaucaag	...(((((......)))))...(((...(((((((((((((((..(((((((((.((.......)).).))))))))....)))))))))))))))...)))........	-41.3	0	0.145503	0.089054	0.164166	0.351209	0.175607
novel_miR_292	4.3	uaagccucgcguguccccgcagc	agcggggccaggcugggggcugcggg	10	-	20546029	20546141	uggaggcaaaguaaggcugggcguggagcggggccaggcugggggcugcggggugccucaugcuggaaccuaagccucgcguguccccgcagcaagaaccuaaccuggaggga	.............(((.((((..((..((((((.((.((..((((((...((((.((.......)).)))).)))))))).)).))))))..))....)))).))).......	-44	0.0936986	0.0485009	0.267162	0.123124	0	0
novel_miR_210	57873.5	uaaagugcuuauagugcagguag	uacugcauuauaagcacuuaaa	1	-	149440071	149440183	gaugacagcucuuguagcacuaaagugcuuauagugcagguaguguucacuaaucuacugcauuauaagcacuuaaaguacugcuagcuguagaacuacauauucagcauguu	....((((((...((((.(((.(((((((((((((((((.(((...........))))))))))))))))))))..))).)))).))))))......................	-40.1	866.478	915.31	806.695	806.956	747.46	911.05
novel_miR_875	1.1	cuucaaguacuggaaggcugca	cagucacucaccugcuuuuaggc	1	-	173385995	173386106	uuuaaagccauuccccuugguucugucccugucagaccauguaaagucagucacucaccugcuuuuaggcucccuucaaguacuggaaggcugcaacauggucucccuggag	.....(((((.......)))))...(((..(..(((((((((...(.(((((..(((..(((((..(((...)))..))))).)))..)))))).)))))))))..).))).	-31.7	0.140548	0.0485009	0.044527	0.123124	0.263407	0.526821
novel_miR_822	2.2	ucucugcagcucucugucuuacag	gucaccuaccaggcggugcaggcggug	20	-	10560281	10560394	ucccugcuccucaccccggcucucugcagcucucugucuuacaggccccucucggcccugucaccuaccaggcggugcaggcggugcccgggucggagccuccuauccuuucuc	.....(((((..((((.(((((((((((.(..((((....(((((((......)).))))).......)))).).)))))).)).))).)))).)))))...............	-41.9	0.281096	0.0970019	0	0.205207	0.131703	0.131705
novel_miR_647	1.3	cauaaugauggauccuggacugg	uuccuucaggauuugucauuaagc	2	+	4055816	4055928	cugccguuugccugcagcgagaaguugagcucuuccuucaggauuugucauuaagcagugaugguacaaacauaaugauggauccuggacuggagaucccugcucauaaaucu	((((.(.....).))))..(((...((((((((((.(((((((((((((((((....(((....))).....)))))))))))))))))..))))).....)))))....)))	-32.4	0.374795	0.242505	0.133581	0.0410414	0	0
novel_miR_58	7	ggcugcccagagaggcuguggaug	uggauagcacucugggca	8	-	11548013	11548128	ucacagggagaguggugaggagcuagaacaggcugcccagagaggcuguggaugcccuagaggugcuaaagacccgguuggauagcacucugggcaaccuggucuaauaccagauc	((((..........))))((...((((.((((.(((((((((..(((((....(((...(.(((.......)))))))...))))).))))))))).)))).))))...)).....	-42.6	0.515343	0	0	0.123124	0.307308	0.131705
novel_miR_832	2	ccuccucccucccuccuucc	ggggagggaggggggcucag	7	+	22607123	22607234	cucuucuuucccuccccucccuccucccucccuccuuccuuccuuccuucuccgggcuugucccggggagggaggggggcucagccugcaguccgccuucacgccugccgac	......................(((((((((((((................(((((.....))))))))))))))))))........((((...((......))))))....	-40	0.234247	0.291006	0.667905	0.28729	0.351209	0.131705
novel_miR_40	795369	ugagaacugaauuccauggacu	guccaugguauucaguucucu	4	-	88746696	88746807	aucuuggcaguucccagcucugagaacugaauuccauggacugguuucaauuccaugcguucaguccaugguauucaguucucuagcuuggcugcaucaaacuucacaacug	......((((((...((((..(((((((((((.(((((((((((...((......))...))))))))))).))))))))))).)))).)))))).................	-48.4	10731.2	12017.8	11189.9	11173.6	11534.7	12441.4
novel_miR_731	0.5	cuaauguucucuucugaucucaac	agagaucuuaagugguggcaucugug	5	-	48153494	48153606	uagccuguguugcaugacucuaauguucucuucugaucucaacauaccacaaauccuuuuaagagaucuuaagugguggcaucugugugcagcacaguugcgcaaguguccca	..(((((((((((((.((....((((((((((..((((((......................))))))..))).)).)))))..)))))))))))))..))............	-29	0	0	0.044527	0.0410414	0.307308	0.131705
novel_miR_181	21	uacauagugaguuccugacaaga	uugucguuucucccauacagu	23	-	5300179	5300289	gcuuuuggauuccaucucuugcuaguuuaaaucuguacauagugaguuccugacaagauuggugacuuucuugucguuucucccauacaguuacagcagugguggugaaga	...........(((((.((.(((.((......(((((....(.(((....((((((((..(....)..))))))))...))))..)))))..))))))).)))))......	-27.1	0.0468493	0.291006	0.089054	0.164166	0.263407	1.00974
novel_miR_741	114916	uagcagcacguaaauacuggag	cuccaguauugcauugcugcuuu	4	-	4044209	4044320	gagagcugucagcagugcucuagcagcacguaaauacuggagugggggaucgccuguugcucuccaguauugcauugcugcuuuagugaggcuggaaaucagucccuggcac	....(((((((((..((((..(((((((....((((((((((..(((.....)))......))))))))))....)))))))..))))..)))))....)))).........	-42.1	1600.09	1687.01	1551.77	1664.27	1610.6	1812.09
novel_miR_909	2.5	gaggucuuugcuguggccaugga	gcucaccgcggccagagccuucg	2	-	595825	595937	ucucaccacggccuugagaugcucaccgcggccagagccuucgccguggcccgacgccugcgccacggccgaggucuuugcuguggccauggagccucgaugcuuuugccacg	.........(((.(((((..((((.(((((((.((((((((.((((((((.((.....)).)))))))).)))).))))))))))).....))))))))).))).........	-49.2	0.65589	0.145503	0.089054	0.697704	0.0878022	0.0439018
novel_miR_418	2.6	cgauggcuucugcggcccugagc	ucccagggccgcaggcuccucacc	7	-	16875976	16876088	cccggggcgcagcuucuccccgccgcaggccucccgcucccagggccgcaggcuccucacccuccgggggcgauggcuucugcggcccugagcaggcugacagacuuuaucug	..(((((.(......).))))).....(((((...((((..(((((((((((..((((.((((...)))).)).))..))))))))))))))))))))..((((.....))))	-53.7	0.0936986	0.0970019	0.222635	0	0.0878022	0.0878035
novel_miR_299	27.1	cagccuggagaggcagcugucc	gaugcucagccccucuggcucagg	17	-	7353186	7353296	cgaauccuagcucaggaaacagccuggagaggcagcuguccccaaggagggcgggaugcucagccccucuggcucagguuugcagggaacauggagcggcagcagacggac	((..(((...(((.(.((((((((.((((.((((((.((((((.......).))))))))..))).))))))))...)))).).))).....))).)).............	-34.7	0.234247	0.630512	0.756959	0.164166	0.351209	0.482919
novel_miR_46	2.4	ggcgccgccgggccgggc	cccccaaggaguguc	23	+	298154	298261	acccauugcguugggaaaaggcuuuggggucccccaaggagugucccgcgugggggaucccgcguggggggcgccgccgggccgggcgcuacggagcuguccguggug	.((((..((.((.....)).))..))))(((((((..((.((.(((((((((((....))))))))))).)).))...)))..))))((((((((....)))))))).	-61.4	0.234247	0.291006	0.400743	0.164166	0.219505	0.175607
novel_miR_970	0.3	ucccugcauuggugcuuuccagc	gaaagcacuggagcggggagc	10	-	3173619	3173729	gcggcguuaucagcguuggcuccacagcgcucccugcauuggugcuuuccagcaaucccuguugugccuggaaagcacuggagcggggagcagagcagggagcagcacacg	.(((((((...)))))))(((((.(.(((((((((((.((((((((((((((((((....))))...)))))))))))))).)))))))))...)).))))))........	-57.4	0.0468493	0.0485009	0.089054	0.0410414	0.0439011	0
novel_miR_43	52.7	agcaccuucggaacuguccuca	agggcaauuccugauaggugcuga	1	-	140535069	140535180	guguaaaugaugacacaugagguugagggcaauuccugauaggugcugagcaccaucuagcugcaaagucagcaccuucggaacuguccucaaccuugucugagaucauggc	......(((((..((.(((((((((((((((.((((.((.((((((((((((.(.....).)))....))))))))))))))).))))))))))))))).))..)))))...	-52	0.65589	0.485009	0.267162	0.902911	0.439011	1.31705
novel_miR_589	2.2	agggggagcgucgugcuuggauucu	agccagcucauguucccccaug	2	+	14083713	14083824	ucugcccacagcacaucuugagggggagcgucgugcuuggauucuguuguguucagagccagagccagcucauguucccccaugagagccacugggcauaacacacaucagg	..((((((..((...(((((.((((((((((.(.(((.((.(((((((........)).)))))))))).))))))))))).)))))))...))))))..............	-43.7	3.3263	1.50353	0.267162	0	0.746318	0.0878035
novel_miR_913	14	gcggcgaaagcagcgcucggc	ugggcgcugccagaauuccccugu	7	-	16278461	16278571	agcccggugugcugggcgcugccagaauuccccugucguguguccaaaucucacccaaauauuuacgacagcggcgaaagcagcgcucggcucacugggacguauuuccuu	..(((((((.((((((((((((.....(((((((((((((.......................)))))))).)).))).)))))))))))).)))))))............	-51.7	0.140548	0.145503	0.089054	0	0.219505	0.0878035
novel_miR_509	1.1	caacgcuccgcagccgcccaga	agggcggcgcggguugcggcggca	13	+	15192876	15192987	gaggcugagaggaggcggagggcggcgcggguugcggcggcagucgcugcggcggggcgcggcggggacgcaacgcuccgcagccgcccagaggaagcggccccggggcggg	...(((....((.(((.(.((((((((((((..(((...((.(((.((((.(((...))).)))).)))))..)))))))).)))))))........).)))))..)))...	-57.9	0	0.0970019	0.133581	0.164166	0.175604	0.0439018
novel_miR_136	8.6	ugaacaauugaagucaucgcagcu	cugugucuaggcuuccauuuu	1	+	50695399	50695512	ggagugcugugucuaggcuuccauuuuguugcuuggguacaguggcucaaaaggucuucugagcucuauuugaacaauugaagucaucgcagcuugacaaaaaaacaucaacac	(..(.((((((....((((((....(((((....((((.(((.((((.....))))..))).))))......)))))..))))))..)))))).)..)................	-27.3	0.140548	0.194004	0.089054	0.246249	0.263407	0
novel_miR_83	2.2	ccugugcugaggacuccacaucugg	aggugagaccccacagaacagggc	9	+	23839936	23840055	ccucuggacacacgccaacagcucugugucucuccugugcugaggacuccacaucuggaugcagugcuccaggugagaccccacagaacagggcagauggcaggaucaccuucuugaccu	((((((((((((.((.....))..))))))..((((((.(((.((..((..((((((((.((...)))))))))).))..)).))).)))))))))).))(((((......)))))....	-43	0.468493	0.145503	0	0.28729	0.482912	0.351214
novel_miR_155	2.1	cagguuggauggggcccuggaca	ugggugcuccaucccugga	7	+	4471442	4471553	auaauagcacuggaacagguuaucuggagaagcugugggugcuccaucccuggacacauucaaggccagguuggauggggcccuggacagcaugaucugauagucugcaaac	...............(((((((((.(((..(((((((((.(((((((((((((.(........).))))...))))))))))))..))))).)..)))))))))))).....	-41.1	0.327945	0.339506	0.222635	0.28729	0.351209	0.307312
novel_miR_194	7.2	cacggcugcugugcugacagu	cgucagcauaggcuguagccgugu	15	+	4934351	4934461	cgcauuggggaaguggcggugccugugccgucagcauaggcuguagccguguucuuguccugguauggggcacggcugcugugcugacagucuuguguggucugccuuccu	.......(((((..(((((.(((...((.(((((((((....(((((((((((((...........)))))))))))))))))))))).)).......)))))))))))))	-48.3	0	0	0	0.164166	0.131703	0.131705
novel_miR_348	0.6	cuuccauaggaucuaggaauu	uuuuugguaucccuagcaagca	1	+	1548369	1548479	gugcucuggcagugccaaaggguauuuuugguaucccuagcaagcagagcuuagaaacaaggcuucuuugcuuccauaggaucuaggaauuauuuuucuuuggcuuugcuc	.......(((((.(((((((((.((((((((.((((...(.(((((((((((.......))))))...))))).)...)))))))))))).....))))))))).))))).	-34.3	0	0	0	0.164166	0.131703	0.131705
novel_miR_820	0	gcgcugcagggaugggac	aacccguccuccagccug	23	-	6132563	6132670	gaugggacguucagagccgccccauuggcucacggggagcggucaccgcgcugcagggaugggaccccccaacccguccuccagccugaccccccccgcccagccugc	((((((.((........)).))))))((((..(((((.(.(((((..(.((((..((((((((.........)))))))).))))))))))).)))))...))))...	-49.2	0	0.0970019	0.133581	0	0	0.0439018
novel_miR_557	0.4	uuccguguugaagaauccuguuuuc	caauagguaucuuccacauccuccugcu	1	+	111657884	111657999	ugucaaugcaauagguaucuuccacauccuccugcuggcuuaaaguuaauuaaaauauucaaguuuuccucuuccguguugaagaauccuguuuucaccaaggagccauccugaau	.........((((((..(((((.((((.........(((((((.(((......))).)).)))))..........)))).)))))..)))))).......((((....))))....	-18.5	0.234247	0	0.133581	0.164166	0.131703	0.351214
novel_miR_458	48	uagaaucauagaauggccugag	aaaggaccacaaugaucauca	Z	-	80215341	80215454	uauuucaguugacuuagaaucauagaauggccugaguugcaaaggaccacaaugaucaucagguuucaaccccccugcuaugugcagggucgccaaccaccagaccaggcugcc	.......((((((((.(((((((.(..((((((.........))).)))).)))))..)))))..)))))..((((((.....))))))..(((.............)))....	-26.4	0	0	0.044527	0.943953	0.702417	1.36095
novel_miR_583	2.3	ccccugcaagcacagcugugagc	ucagagcugcuugcaggcagc	8	+	29047934	29048046	gccagaagguauggcagagcccccugcaagcacagcugugagcaggcagccagcagcucagagcugcuugcaggcagcgcugcccugucagacccgucugugcagcagcacgc	(((....)))..(((((.((..((((((((((..(((.(((((..((.....)).))))).)))))))))))))..)).)))))((((((((....)))).))))........	-55.5	0	0.0485009	0.267162	0.0410414	0.0878022	0.0439018
novel_miR_6	2.8	uggugucgcucugggauccccgu	uggggucccguggugucauuuug	25	+	1994677	1994787	gaugucacuuugggguccccguggugucgcucugggauccccguggugucacuuuggggucccguggugucauuuuggggucccgaggugucccuguggguucuccauggg	...(.((((((((((.(((((.((((.((((.(((((((((.(((....)))...))))))))).)))).)))).))))))))))))))).)(((((((.....)))))))	-62.3	0.140548	0.0970019	0.267162	0.656663	0.175604	0.219509
novel_miR_159	0.1	uacugguaagcugcuccuuga	uagaagcaguucugcaauacagugua	2	+	103389263	103389374	uaguauauuucuugauagggccacauccacacuagaagcaguucugcaauacaguguagaaguauuccuguacugguaagcugcuccuugaauggaaguggcuuagauuauu	............((((.(((((((.((((..(.((.(((((((.(((....((((((((........)))))))))))))))))).)).)..)))).)))))))..))))..	-33.8	0.187397	0.0485009	0.044527	0.0410414	0.0439011	0.0439018
novel_miR_45	3.1	cuucugacugcaucugaugcu	cugggaugucagacucucc	17	-	8256718	8256828	ccaccucccagccccagcaaaugaugacuuggaggugggcccugguaggagcugggaugucagacucucccuucugacugcaucugaugcugcugauaggaaaagcuggca	((((((((.(((..((.....))..).)).))))))))((((((.(((.((((.((((((((((........))))...)))))).).))).))).))))....)).....	-40	0.140548	0	0	0.0820828	0.0439011	0.175607
novel_miR_907	0.7	uguguucuccucugugacuagg	uggucuaaggaagaacaugca	1	-	49620407	49620515	ggacaggcuugaguaggaaggaauguguucaagcucauggucuaaggaagaacaugcauuauuaauauuguguguucuccucugugacuaggacauaaaccaggaggug	.....((((((((((.(......).))))))))))..(((((..((((.(((((((((..........)))))))))))))....)))))........(((....))).	-29.7	0.609041	0.0485009	0.044527	0.451456	0.746318	0.526821
novel_miR_525	1.6	uuuuuugacugcuuucuuugcu	ugcaaagaaggcagcaagagugcugug	8	-	8119067	8119178	ccucucccgaguugccugaggugccucugaugcuguuuucuuugcaaagaaggcagcaagagugcugugcuuuuuugacugcuuucuuugcuagguccuacccagaagaaau	((((.............))))....(((..((..((...(((.(((((((((((((((((((.((...)).)))))).))))))))))))).)))....)).))..)))...	-34.8	0.374795	0.388007	0.311689	0.492497	0.482912	0.702428
novel_miR_259	1.8	ugagaaucucccuguccuuugu	aagggacagcugcaguuuuuucagc	5	+	54900482	54900593	cauuacagccaucuacagacacaucuuucaagggacagcugcaguuuuuucagcccaguguauacucugcugagaaucucccuguccuuuguaagaugccuguaauucuucc	.............(((((...((((((.((((((((((..(.((..((((((((..(((....)))..)))))))).))).)))))))))).)))))).)))))........	-36.7	0.187397	0.145503	0.089054	0.0410414	0.0878022	0.219509
novel_miR_351	2.2	uccgccgggaggcgcuggcgcu	cgccgcucccuccccgcacagc	32	+	648498	648606	acgcuuuaauuaacguaauuaacgccgcucccuccccgcacagcgucguucccaauggccgggagcgaccuccgccgggaggcgcuggcgcuguaccgcgcaaugcucc	.(((.(((((((...)))))))((((((..((((((.((..((.(((((((((.......)))))))))))..)).)))))).)).)))).......))).........	-43.6	0.0468493	0.242505	0.311689	0.0820828	0.219505	0.219509
novel_miR_905	2.4	ucuggcuuagggcugcuccauc	cggcgcagagcccguugccguggg	10	-	19639403	19639514	gauccugcuggaaacguggauguggggugacggcgcagagcccguugccgugggguguuucacacuccccucuggcuuagggcugcuccaucucccccuguccucauccccu	..(((....)))...(.(((((.((((.((.((.(((..((((...((((.((((.((.....)).))))..))))...))))))).)).)).)))).))))).).......	-48.3	0.187397	0	0.089054	0.164166	0.131703	0.131705
novel_miR_668	2	ugaucaccucggacguugcuuu	aaagcaacgagaggucggucug	10	-	13575775	13575885	ccggaucccucuccacuucugaucaccucggacguugcuuuggugacaacccggagcaaagcaacgagaggucggucugaaacaccacugcugcugcagcuggagcugccc	..(((......)))..(((.(((((((((...((((((((((.(..........).)))))))))).))))).)))).)))...(((((((....)))).)))........	-38.9	0.234247	0.194004	0.089054	0.492497	0.263407	0.351214
novel_miR_671	28963.7	uaauacugucugguaaugccgu	gucuuaccaggcaaaguuaga	21	-	2598555	2598666	gguuuccuuuagccugagcgccugcugauugcugucuuaccaggcaaaguuagaucuagcuauuucugucuaauacugucugguaaugccgucaaucgcaugggcaaaaguc	((((......))))...((.(((((.((((((.((.((((((((((..(((((((..((......)))))))))..)))))))))).)).).)))))))).)))).......	-37	355.867	417.108	499.147	431.51	430.582	393.228
novel_miR_717	2.2	auggaggcguggguuuuua	gaaaccucacccagcagua	1	+	123741820	123741927	agcuucuccuucugggaaggaggcagugaggggguuucucuguuauucagaaaccucacccagcaguaaaauggaggcguggguuuuuaggaggcagacaccccgugc	.(((((((((((...)))))))).))).(.(((((...(((((..((((((((((.(((((..((......))..)).)))))))))).))).))))).))))).)..	-43.4	0.0936986	0.0970019	0.222635	0.205207	0	0.0878035
novel_miR_267	112003	uggaagacuagugauuuuuguuguu	caacaaaucacagucuaccaua	W	-	4705157	4705271	gacauuggucuaguucuguguggaagacuagugauuuuuguuguuuuuagauaacuaaauugacaacaaaucacagucuaccauauggcacagacuaugccucuacaggacaagu	..(((.(((((.((.((((((((.(((((.((((((..((((((((((((....)))))..)))))))))))))))))).)))))))).))))))))))(((....)))......	-40.8	2173.81	1692.44	1011.65	1225.33	1702.31	2009.6
novel_miR_47	2.1	uaccuuccugcacuucucagagc	ucugggaagcacaguggggagcacaga	7	+	35433987	35434097	ucuguuuggguuuggcuguuuaccuuccugcacuucucagagcaggccucuggccucugggaagcacaguggggagcacagacagacagugaugcugugaaaccaccccag	.....(((((..(((((((((..((((((((.(((((((((...((((...)))))))))))))....))))))))...))))))(((((...)))))....))).)))))	-41.2	0.0468493	0.0485009	0.089054	0.246249	0.0878022	0.0878035
novel_miR_759	0.9	ugugcucacgcuuuccuuccugc	agggagaggagcagaucauccg	8	+	20472040	20472152	ccgccacucagagggcagggagaggagcagaucauccggggagggaacuggcacguguuccucacugcccugugcucacgcuuuccuuccugccaggugguacuacauugugg	..((((((.....(((((((((.(((((.((.(((..(((.(((((((........)))))...)).))).))).))..))))).))))))))).)))))).((((...))))	-44.2	0.0936986	0	0.222635	0.0410414	0	0.0439018
novel_miR_208	0.8	ucugggcuugcugugcaucug	ggugggcaaugggcugggc	28	-	1894675	1894786	acaucucagucugagccucugggcuugcugugcaucugugcuguccuagaucuggagcaggggugggcaaugggcugggcucagccccaguggugucagggcuugcagccaa	(((((.(.(.((((((((...((((((.(((.(((((.(((..(((.......)))))).))))).))).)))))))))))))).)...).)))))...((((...))))..	-46	0	0	0	0	0.0439011	0.219509
novel_miR_166	2	uguccuucggugucucugcuggu	cugcagagccucccaggagcaga	18	-	5222101	5222213	uuaauaccaauguccaccaauggcagaagcccucugcagagccucccaggagcagagcucugacagcugcuguccuucggugucucugcugguggauucugccucucagaaac	.....................(((((((.((.((.((((((.(.((.((((.(((((((.....)))).)))))))..)).).)))))).)).)).)))))))..........	-39.9	0.187397	0.145503	0.311689	0.164166	0.131703	0.263411
novel_miR_514	0.9	cuaugggcucucuauggga	cuauggaucccuaugggc	15	-	180506	180622	ucucuaugggucacuaugggcucucuauggaucccuaugggcucucuauugguucucuuuguggucucuauguacucuaugugucccuaugggucccuaugggcucucuaugggauc	..(((((((....))))))).((.(((((((..((((((((..(.((((.((..(.(...(.(..(.....)..).)...).)..)).)))))..))))))))...)))))))))..	-30.7	0	0.0485009	0	0.0410414	0	0
novel_miR_115	0.3	uacaaggacaggcugagaga	uuucaguaucuaagagag	Z	+	27621104	27621219	gaagaaacaccucccuuacaaggacaggcugagagagcuagggcuauucagucuccagaggagaaaucuggagagaccugacagcagauuuuucaguaucuaagagaggguaaaaa	............(((((.(..(((...(((((((((.((...(((..((((((((((((.......))))))))...)))).))))).))))))))).)))..).)))))......	-35.6	0.468493	0	0.044527	0.369373	0.219505	0.131705
novel_miR_393	19715.8	agggcuuggcgcagcugugaaca	uucacaguggcuaaguuccgc	30	+	1398449	1398560	gagcugaggccccguggcgcagggcuuggcgcagcugugaacagagcccgucguguucacaguggcuaaguuccgcgccccggggacccccccuuaaggacccccaccgccc	(((..(.(((((((.(((((.(((((((((.((.(((((((((((.....)).)))))))))))))))))))).))))).))))).)).)..)))..((....)).......	-55.3	165.097	190.706	229.537	162.893	171.478	166.432
novel_miR_111	1.2	agugggcuuacuuuucuu	gauuucgaagcucaucca	28	-	5009079	5009186	uucgauucccggccaacgcaagugggcuuacuuuucuuucugcuucgcauagauuucgaagcucauccaaaacgcgucucguagcgcgguuuuccccggcugggugca	.......(((((((.......((((((((.....(((...(((...))).))).....))))))))......(((((......))))).........)))))))....	-31.8	0	1.94004	1.24676	7.92099	6.14615	7.63891
novel_miR_378	1.9	uggucuguacugguccguac	acugggccauacugggccauu	33	+	6118220	6118329	ugggccacacugggccauacuggucuguacugguccguaccgggucauacugggauguacugugccauacuggucuguacugggccauacugggccauucuuggauguac	..((((......))))....(((((((((.((((((((((.((((((...(((.((.....)).)))...)))))))))).))))))))).)))))).............	-37.4	0.0468493	0.339506	2.04824	0.656663	1.09753	1.22925
novel_miR_920	1.9	caagggcuacgcggugagcgu	gcucaccucgcuggcccgcgcc	9	-	12972116	12972226	gcgcggcggcagagcaagcccaagggcuacgcggugagcgugcacuacucggcgcucaccucgcuggcccgcgccugccccgagagcgcgcugcaccgcgugggcagcaug	((((((.(((((.((..((....((((((((.(((((((((..........))))))))).)).)))))))))))))))))....))))(((((.((....)))))))...	-60.2	0	0.0970019	0.044527	0.0820828	0.0878022	0.131705
novel_miR_39	2.1	uaauugacucuauuguugcugaa	gggcuggaauagaguuaauuuuc	5	-	43791910	43792021	gaaauugcagaaagagagagagaaguguccugguaugggcuggaauagaguuaauuuucuuccuaguagcuaauugacucuauuguugcugaaaccaggacacacagacugc	......((((..............((((((((((.(.(((.(.(((((((((((((..((.......))..))))))))))))).).))).).)))))))))).....))))	-40.5	0.936986	0.242505	0.935067	0.615621	0.307308	0.74633
novel_miR_8	3.59523e+07	ucagugcacuacagaacuuugu	aaaguucugugacacucagacu	2	-	32120634	32120743	gcgcccgaggaggauccggucuccugaagcaaaguucugugacacucagacucugguuacgauagcagucagugcacuacagaacuuugucuccgggggcugcggcggcg	((..(((.........((((((((.((.(((((((((((((.((((..(((((((.......))).))))))))...))))))))))))).)).)))))))))))..)).	-45.3	539529	526720	521585	518113	526510	517551
novel_miR_322	2.7	uacccccacccgcacauacacc	gcugggcgggugggggcacggc	27	+	7153784	7153897	ggagcccgagaccccuccguacccccacccgcacauacaccccaaaggcacagaguggggcugggcgggugggggcacggcggcugcuccggggucagcggcacagugacgggg	.((.((((((...((.((((.(((((((((((.((....(((((...........))))).)).))))))))))).)))).))...)).)))).))..((.........))...	-56.7	0.234247	0.145503	0.222635	0.0410414	0.0439011	0.263411
novel_miR_376	2.1	uguguccuagugggcugagu	acagcucucuagggcagagg	1	-	92983406	92983518	uuccugcuaaggcccugccugcacguagcaaagaauccacagcucucuagggcagagggaagugugcaccuguguccuagugggcugaguucucucccgauagcuaucuccua	....(((((((((...)))).....))))).(((((...((((((.((((((((.(((..........))).)))))))).)))))).)))))....................	-40.1	0.187397	0.0970019	0.089054	0.246249	0.307308	0.131705
novel_miR_701	2.4	uuuaugcuucugaaugccuuug	aaggcagucaggagccuaauuc	1	+	66008277	66008388	ucuuucggccagcucacuggccuggaucuccaaaggcagucaggagccuaauuccuuucuagaaugagauuuaugcuucugaaugccuuugggaauccaaagcaccaacaaa	......((((((....))))))(((((.((((((((((.((((((((.(((.((...((......)))).))).)))))))).)))))))))).))))).............	-47.6	0.70274	0.873017	0.756959	0.28729	0.351209	0.439018
novel_miR_922	0.8	gggugacacugaacacugua	auggagcaggucauuugga	1	+	51315495	51315609	cugacagcugugcuuuuggcugggugacacugaacacuguagacauggagcaggucauuuggaauaagcacuuaaguguugguuggugcaugggaggauagugaacaggagaagg	(((...(((((.((((((.(((((((((.(((..(..((....))..)..)))))))))))).....(((((............))))).)))))).)))))...))).......	-27.9	0.0468493	0.0970019	0	0	0	0.0878035
novel_miR_87	0.8	gugugcuucggaaaguaaacuac	uguuuuuuuuucauguaugcacug	1	-	138972525	138972635	ccaacacagaaagcggugugcuucggaaaguaaacuacagaagaggaaagguaacauucuuuucuguguuuuuuuuucauguaugcacugcuugagaaggucauaacacaa	...((.....(((((((((((...((((((.((((.(((((((((((.........))))))))))))))).))))))..))..)))))))))......))..........	-30	0.0468493	0	0	0.246249	0.0878022	0.131705
novel_miR_291	2.7	ugugcucggcugaggagc	ucugauggcugcagcacgag	9	+	22769123	22769230	ccacauggaaaggcugcggccguuccugugcaggcugugcugcccuggcucugauggcugcagcacgagcugugcucggcugaggagcaaagcacacagccuaugaga	.((((.((((.(((....))).)))))))).((((((((.(((....(((((..((((((.(((((.....))))))))))).)))))...)))))))))))......	-56.2	0.0936986	0	0.178108	0.164166	0.219505	0.175607
novel_miR_52	0	cuuguucuucuggaaaca	cuuccugaagagcauagug	13	+	2265983	2266097	aaaugcaggaguaauaagcaauugcauuaacaaaaacuuccugaagagcauaguggaucauaaaaacaaauuuuuggucuucuuguucuucuggaaacaguuuaaagaucaagua	.(((((((..((.....))..))))))).....((((((((.((((((((.((.((((((.(((......))).)))))).)))))))))).)))...)))))............	-30	0	0	0.133581	0.164166	0.0439011	0.0878035
novel_miR_593	5253.4	ugugcaaauccaugcaaaacuga	aguuuugcagguuugcauccagc	1	-	149439952	149440064	uuuguuguuaaauugaacacuguucucugguuaguuuugcagguuugcauccagcuguaugauacucugcugugcaaauccaugcaaaacugacuguggcagugacaagucag	.................(((((((...((((((((((((((((((((((..((((.............)))))))))).)).)))))))))))))).))))))).........	-39.2	50.2693	48.3554	39.0056	35.9112	36.2184	44.8237
novel_miR_123	1	aggacgggugccuuuggaaaa	ggugaagggcauccuug	19	-	1642208	1642318	aaggaaaugcaggguguucaaggacgggugccuuuggaaaacaaugaaguggugaagggcauccuugaagaggccuucaugcuaugaaacaucaggagucauagcagguug	.......((.(((((.((((((((....(((((((.(...((......))..).)))))))))))))))...)))))))((((((((..(.....)..)))))))).....	-33	0.0936986	0.0970019	0	0.123124	0.0878022	0.0878035
novel_miR_60	0.6	cuguaucccugugcuuuu	aagcacagcacagag	9	+	8652534	8652641	aaaaugaugcagugaaucugcauccaugcaccacauuaucacgcuuccagaagcacagcacagagugccucuguaucccugugcuuuuuguuccgaguuuagaaaccc	.....(((((((.....))))))).................((...(.((((((((((.((((((...))))))....)))))))))).)...)).............	-29.2	0.0936986	0	0.044527	0.0820828	0	0
novel_miR_591	1.2	uuacagaacgccgaggugaagacg	gucuuccucagugcuacacu	9	+	909053	909166	gucagcucaacugaggugucuuacagaacgccgaggugaagacgucagaagucugcugucuuccucagugcuacacuuguuugucaucuuugcuguuuucggcagaaaaaaaga	.((((.....))))((((.(..((((..(((.((((..((((((.(((....))).)))))))))).)))......))))..).))))(((((((....)))))))........	-31.9	0.0468493	0.0970019	0.089054	0.0410414	0.0439011	0.0439018
novel_miR_108	2.5	gacccccccccagcucugac	cagaguugggggggggccc	32	+	240801	240910	ccaccacccaaagagugagauuuggaaggggggggggggggggcucagaguugggggggggcccaugcgggacccccccccagcucugaccaccaccaccucccuccccc	.......(((((........)))))..((((((((((((((((.((((((((((((((((((((....))).)))))))))))))))))...)).)).))))))))))))	-82.1	0.0936986	0.0970019	0.222635	0.0410414	0	0.0439018
novel_miR_657	4.9	acgugccuugugccuccccgcagg	agcgggugggcagggcacggca	1	+	36512880	36512991	uaggugucgggagagcggcgagcgggugggcagggcacggcagggcagcagggcuggccgcgacacugacgugccuugugccuccccgcaggcggccgcccucuggcucccc	..((.(((((.((.(((((..(((((.((((((((((((.(((.(..((.((.....))))..).))).)))))))..))))).))))).....))))).))))))).))..	-61.6	0.0468493	0.0970019	0.222635	0.0410414	0.0878022	0.0439018
novel_miR_442	563960	uaauacugccugguaaugaugau	caucuuacugggcagcauugga	21	-	2603391	2603503	ugcuuguagaccaugauccugagaugccauuaccaucuuacugggcagcauuggauguucucuguuuuucuaauacugccugguaaugaugauugugguguuucgugcacaac	.................(.(((((((((((...(((((((((((((((.((((((.............)))))).))))))))))).))))...))))))))))).)......	-38	6945.36	8321.6	8949.61	7886.68	8386.78	8618.05
novel_miR_211	295453	guccaguuuucccaggaaucccu	ggauuccuggaaauacuguucu	13	-	9212100	9212212	gcggucgccgugcucucaggguccaguuuucccaggaaucccuuaggcgcuacguuggggauuccuggaaauacuguucuuggggccacggcucugcaccuggagacagcccg	((((..((((((.((((((((..((((.((.((((((((((((..((((...)))))))))))))))).)).)))).)))))))).)))))).))))..(((....)))....	-57	4004.12	3950.35	5872.71	3055.25	3598.22	3381.36
novel_miR_723	81.7	uccgccugcgggaugacgucgc	gaccucaccccgauggcguag	14	-	15402592	15402703	ugcggggcgcugcguggggcugcggggccccgaccucaccccgauggcguagcggacgaccccggcgcgcuccgccugcgggaugacgucgcuguagcgcagcacaucgccg	.((((.(.(((((((((((((....))))))(((.(((.((((..((((.((((..((....))...)))).))))..)))).))).)))......))))))).).))))..	-57.9	1.03069	1.26102	1.78108	0.902911	1.09753	1.18535
novel_miR_416	2.1	ccccagggggggcccacg	accgccccccacugcgcgc	22	+	5456645	5456753	cgcaggcgcagcuccggggggauccccuccaaccgccccccacugcgcgcccacacgaaggccaacgucacccccagggggggcccacgggacagcagcugcgccgcca	.((.(((((((((((((((((....)))))....(((((((.(((((.(((........)))...)).......))))))))))...)))......)))))))))))..	-50.2	0.187397	0	0.089054	0	0.219505	0
novel_miR_200	1171.5	agagguaguggguugcauaguu	cuauacaaccugcugccuuucu	12	-	6488742	6488853	gaagcauugggcuccuaggaagagguaguggguugcauaguuuuagggcagggauuuugcucacaaggagguaacuauacaaccugcugccuuucuuagggcuuuauuauaa	........((((.(((((((.((((((((((((((.((((((...((((((.....))))))..........)))))).)))))))))))))))))))))))))........	-44.3	14.5233	19.4974	13.5807	14.5287	17.297	15.6729
novel_miR_864	20.7	ugguggugcgcucugugcagca	cugcacagcuguacuaccaug	7	+	389291	389400	agcccuggcugugggcuggaugguggugcgcucugugcagcacagggcagauugcugcugcacagcuguacuaccaugugccccacuggcagcaccaugcuuccaccagc	....((((..(((((.((.(((((((((((..(((((((((((((......))).)))))))))).))))))))))).)).)))))(((.((((...)))).))))))).	-54.5	0	0.194004	0.133581	0.28729	0.307308	0.263411
novel_miR_64	0.8	uuuaaaacgucuggaacaac	gcuuucaggcuuuggaagu	2	+	30983885	30983993	aucugcagcuuccuucucauuuaaaacgucuggaacaaccagugguuguggaacuucugggcuuucaggcuuuggaaguucugcugcugcaaacucuucaagcaccgcu	....(((((...(((((......(((.((((((((...((((.((((....)))).))))..))))))))))))))))....)))))(((...........))).....	-30	0	0	0.089054	0.205207	0.219505	0.0439018
novel_miR_168	1	uauauauauacacacacaauau	uuuguguguguauauauguaca	3	+	78464645	78464756	uguguauguguguauauauguuuguguguguauauauguacauguuauauguguauaucuauauauauacacacacaauauauauuaauguggucuaggaaaauguagcaau	....(((((..((((((((...((((((((((((((((((.((((.........)))).))))))))))))))))))))))))))..)))))..(((........)))....	-31.1	0	0	0	0.0410414	0	0.263411
novel_miR_750	1.4	cuuugauuuggaagugaacugucu	guggucucacuugucauggug	20	+	13130095	13130208	uuauuucuucagauuggucucuuugauuuggaagugaacugucucaccaagauccuguuuggggcccuggugguggucucacuugucaugguggcccuucagcauuuugcuggc	...............((((.((.((((....((((((((((.(.(((((.(.((((....)))).).)))))))))).)))))))))).)).))))..((((((...)))))).	-33.5	0.0936986	0.0485009	0.089054	0.492497	0.175604	0.0439018
novel_miR_804	112.5	cagaccucugucaagugcuuc	agcacuugccauuguggauguc	2	+	61233550	61233659	aaaacaggaguagauggguggagaagucaggagagcacuugccauuguggaugucggaucacaaaccucacagaccucugucaagugcuucccugaugaacgaguggcac	.................((.(....((((((.(((((((((.((..(.(..(((.((........))..)))..))..)).))))))))).)))))).......).))..	-28.5	1.31178	1.45503	1.51392	1.51853	2.37066	1.97558
novel_miR_443	92.7	ugcuguguccucacucaccuu	gugggcugggagcacaggcacu	33	-	5702492	5702602	gagcagacagcgugaaggagggcugcccugcaggugggcugggagcacaggcacugugggcuucguguggugcuguguccucacucaccuucauggcuugcagaaucggua	..((((....(((((((.((((...)))).).((((((.((((.((((((.((((....((.....)))))))))))).))))))))))))))))..))))..........	-38.8	0.983836	1.35803	1.38034	1.27228	1.58044	1.58046
novel_miR_561	2.3	guuccagucuguuuugaaauuugcu	uggggaagggagggaggug	3	+	10555889	10556002	gcagcucuugaaaauuuucaguuccagucuguuuugaaauuugcugguguggggaagggagggaggugggcugggaggaaaagggguggugagaaagaacacacacuuuguaau	....(((((.....((((((((.(((.(((.((((....(((((....)))))...)))).)))..)))))))))))...)))))((((((........))).)))........	-26.7	0.0468493	0	0.044527	0.205207	0.0439011	0.219509
novel_miR_958	0	ucuucucgggacuggcgcaugcacc	ugcaugcgcccggcccugccggaga	15	-	317054	317163	uugcgcucuccucucucuucucgggacuggcgcaugcacccugccuucccgaagcaggugcaugcgcccggcccugccggagauagcgcaugcacagugccuucuaaaac	.((((((......(((((....(((.((((((((((((((.(((.........))))))))))))).)))))))....))))).)))))).(((...)))..........	-46.6	0.0468493	0.145503	0.044527	0.0410414	0.0439011	0
novel_miR_906	2.3	ucuugcagcagugagaaccaga	uguuuuucccuguugccgaggggg	3	-	52204799	52204910	cuaucagugggaguugaaggucaugcuaacucuguuuuucccuguugccgaggggguuuuagcaugagccucuugcagcagugagaaccagagcucagcuugcacaugcuuu	....(((((.(((((((((......))..(((((.(((((.(((((((..(((((((((......)))))))))))))))).))))).))))).))))))).))).))....	-43.9	0.374795	0.582011	0.623378	0.902911	0.658516	0.351214
novel_miR_936	2.3	auuugaagucgcauuggga	ucaagugaagagaaugucgug	14	+	15264432	15264540	cacuuuuguuuauucaagugaagagaaugucguggaaugucauagauccucauuuuaugcaauuucacuuauuugaagucgcauugggaaacuagugauaaaauccaag	((((...((((.(((((((((...(((((..(((((((..((((((.......))))))..))))))).)))))....)))).))))))))).))))............	-25.2	0	0	0.222635	0	0	0
novel_miR_765	12	uccuggcuuugugaaacgauuc	aaucguuucacaaggccagga	Z	+	57552820	57552930	ucuaggauacuauacauuauuagucaguggucugaaucguuucacaaggccaggaauuauccagcuauauuccuggcuuugugaaacgauucagaccacugacuaauacug	..(((....)))..((.((((((((((((((((((((((((((((((((((((((((...........)))))))))))))))))))))))))))))))))))))))).))	-71.1	0	0.194004	0.044527	0.0820828	0.175604	0.131705
novel_miR_933	1.7	cugugugaugagauacugucugauu	uuagauggcuuacacuggcug	3	+	80838653	80838767	agccugcaaagccuaccuuacugugugaugagauacugucugauucugguaugcugagaaggcuuuuugugccagaauuuagauggcuuacacuggcugacaggcaguauuacau	.(((((...((((...........(((.((((...(((((((((((((((((...(((....)))...))))))))).))))))))))))))).))))..)))))..........	-36.1	0.327945	0.727514	0.267162	0.164166	0.439011	0.0439018
novel_miR_843	31410.4	aagguccaaccucacauguccu	gauauauguggucagaccuauc	22	-	2948483	2948594	ggaauaucagaccugugggaaagguccaaccucacauguccuguauagaauaaggagggauauauguggucagaccuaucccacaggcccuguauucuuacacaagugcaga	((((((.(((.(((((((((.(((((..(((.((.(((((((..............))))))).)).)))..))))).)))))))))..)))))))))..............	-46.7	412.789	345.521	431.956	400.277	498.453	495.431
novel_miR_248	1.2	gacgagaugcugcccuucucugagc	acggagggggacacuucuucucua	7	-	22196355	22196474	ugggggcugccugccuuccagacgagaugcugcccuucucugagcugcggggcgcuggcccccggcaccacggagggggacacuucuucucuaccuucccuggauccucagguaaggaau	.((((((.....)))))).(((.((((.(.((.(((((((((.((((.(((((....)))))))))....))))))))).))).)))).))).((((.(((((....))))).))))...	-54.5	0.140548	0.0485009	0	0.123124	0.0439011	0
novel_miR_444	920.1	ugccuacugagcugacacgcagu	uggcucaguucagcaggaacaggg	30	+	1398608	1398716	ccacccggcgccgcccccggugccuacugagcugacacgcagucguuggucgcacacuggcucaguucagcaggaacaggggucugcgccgccgccgccgcaccgggac	.....((((((.(.((((.((.(((.(((((((((....((((.((.(....)))))))..))))))))).))).)).)))).).))))))...(((......)))...	-47.4	10.7753	13.6773	20.1707	10.9581	12.5118	12.0291
novel_miR_414	1.7	agcagcauuguacagggcuauca	agcuucuuuacaguguugccuug	6	-	20232358	20232472	gaugauucucuuucaagucuucucuuugcuuucagcuucuuuacaguguugccuuguggcauggaguucaagcagcauuguacagggcuaucaaagcauggagaguugcagcagg	..(((.......)))....((((((.((((((.((((.((.(((((((((((.(((.(((.....))))))))))))))))).))))))...)))))).))))))..........	-35.5	13.7269	14.8898	16.8312	11.7378	12.863	12.8632
novel_miR_729	52	uuagcgauucuaugauucuau	uggcuuagugagaaccauuggu	1	+	34854	34963	ggacauggcuuagugagaaccauuggugaugguuggacuggaugauccugugggucuuuuccaaccuuagcgauucuaugauucuaugauuauugcugcccugcagccuu	...(((((....((.(((...((((.(((.(((((((..(((.(((((...)))))))))))))))))).)))))))))....)))))......(((((...)))))...	-31.1	0.468493	0.339506	0.400743	1.06708	0.658516	0.482919
novel_miR_7	12.4	agccugacuccugagcacuccuuug	aguggguguggggaacaucgugcuggc	11	-	17964157	17964266	cucuguaggugaugugaccagccugacuccugagcacuccuuugaaaaaacaaaaguggguguggggaacaucgugcuggccuuguacaguggucuuuuugccuauggag	((((((((((((...(((((((.(((.((((..((((((((((.........)))).)))))).))))...))).)))))((.........))))...))))))))))))	-38.4	0.0936986	0.0485009	0.133581	0.328331	0.0878022	0.175607
novel_miR_69	532.1	ucauggugcucuucucuuccagg	uggugagaagcgugcuguggagc	12	+	3567413	3567525	uuuugagaagaaggugaggcuggugagaagcgugcuguggagcgugguauggcaaagcuuggugcucauggugcucuucucuuccagggcgcucugucugagaggcagcagau	............((((...((((.((((((.((((((((.((((.(((........)))...)))))))))))).))))))..))))..))))((((((...)))))).....	-37.7	3.74795	4.21958	4.00743	3.52956	3.9511	3.68775
novel_miR_877	2.9	cacuguauggugcuguacgcaug	ggggugcagcaccauacagugug	20	-	9614798	9614909	guguugccugcucugcuucacacuguauggugcuguacgcaugggcaggagaagggcauggggugcagcaccauacagugugaagcauagcagcaccccagcucguagggcc	....(((.((((.(((((((((((((((((((((((((.(...(.(........).)...).))))))))))))))))))))))))).))))))).(((........)))..	-64.6	0.468493	0.339506	0.178108	0.533538	0.39511	0.439018
novel_miR_337	1.6	gccgggcggggcgguccu	caacgcccgcccggccg	1	+	37861412	37861519	gcaccauggcugccgccggaccaacgcccgcccggccgccgcgcagcagcggcgcggaggaggagcggcggccgggcggggcgguccuugugccggcagcacgccgcc	......(((((((.(((((..(((((((((((((((((((((.(..(..(......)..)..).))))))))))))).)))))....)))..))))).))).))))..	-69.3	0.0468493	0.0485009	0.178108	0	0.0878022	0.0439018
novel_miR_399	11.8	agcagguuaggaaguguucuuu	agaugcucuuuccacccugcagg	11	-	18463776	18463888	gugcuugggcucugagugcuagcagguuaggaaguguucuuucugcaaggcagggcugcacugaagaugcucuuuccacccugcaggcugaacucgaaauccagagcgaugcu	.((((((((...((((((((.(((((...(((((.(((((((.((((.(......)))))..))))).)).)))))...))))).)))...)))))...)))).)))).....	-35	0.0936986	0.194004	0.267162	0.246249	0.131703	0.175607
novel_miR_279	1.9	uugugccugcauaaacugacu	ccagaguaugacaggcaucaug	2	+	63088128	63088237	caccccugcuggcuggagcauugugccugcauaaacugacuguguauagccagaguaugacaggcaucaugcccucuccaguuuaccccacugugacccauuaaggaggg	.......(((((..((.((((.(((((((((((..(((.(((....))).)))..)))).))))))).))))))...)))))...(((..((...........))..)))	-38	2.20192	1.69753	1.87013	1.47749	2.10725	2.32679
novel_miR_911	2	uggaauguaaggaagugugugg	acaugcuucuuuauauccccaua	3	-	107587589	107587699	gaggucacgauccagacuucucuuaugagaugacaugcuucuuuauauccccauauggauuaggcugcuauggaauguaaggaagugugugguuucagggagacaucacca	..((((........))))(((((..((((((.((((((((((((((((..((((((((......))).))))).)))))))))))))))).)))))).)))))........	-40	3.27945	4.65609	3.20594	6.64871	5.04863	7.63891
novel_miR_910	0.3	cguugcggggucgccgccgccg	gcggcggcgaccccgcaacgca	5	-	13266909	13267022	caaaagcugcaccucagaaacacgucgcgguggggacggcggcggcgaccccgcaacgcaccggggugcguugcggggucgccgccgccguccccaccgcugagaggggagauc	......((.(.((((.........(((((((((((((((((((((((((((((((((((((....))))))))))))))))))))))))))))))))))).))))))).))...	-96.5	0	0	0	0.0410414	0.131703	0.0439018
novel_miR_219	50	auguugcuggaaggagcagagg	ucugcugcuuucugcuggcauc	2	-	6451288	6451399	caaguccugccucucuggugauguugcuggaaggagcagaggacaugugaggucucugcugcuuucugcuggcaucacgcaguuguggcauagagcaucacaggcaguggga	....(((((((...(((((((((((((.(((((.(((((((..(......)..))))))).))))).)).)))))))).))).((((((.....))..))))))))).))..	-46.8	0.327945	0.873017	0.801486	0.656663	0.482912	0.395116
novel_miR_117	2	acacagcuggaggaggagaca	cauccugcacagcauuaugucu	21	+	5208509	5208616	aaggguggaaucaugagacacagcuggaggaggagacagcagugccugcauccugcacagcauuaugucucaguggcagaacugagcuggcuuuccucugagucagcc	...(((....((((((((((..((((..(.((((..(((......)))..)))).).))))....))))))).)))....)))..((((((((......)))))))).	-39.1	0.468493	0.436508	1.60297	1.23124	0.878022	0.219509
novel_miR_567	1.5	cucggagcggccccggcggc	ugcgcgggguggcggugaggg	7	-	16913768	16913875	agcgcccccgggggaucgucccucggagcggccccggcggcgagucggggugcgcgggguggcggugagggagggaugcccucgggaacggcggcguuaaaggcgacg	..(((((((((((((((.(((((((..((.(((((((((.(.......).))).)))))).))..)))))))..))).))))))))((((....))))...))))...	-63.5	0	0	0	0.0820828	0.175604	0.131705
novel_miR_104	9667.3	ugugcgguugcagaagaagaaga	uuccucuucucuuccgccccagg	19	+	254383	254494	ccuuuccucgggacagugccugugcgguugcagaagaagaagaccggcgcuucacggcuuucuuccucuucucuuccgccccaggugacuaccgcaccgaggcagccaacag	.....((((((..(((((((((.((((..(.((((((.((((((((........)))...))))).)))))))..))))..))))).)))...)..))))))..........	-45	36.1677	33.1746	36.4676	32.0944	33.5404	33.4092
novel_miR_774	2.6	uuugcuaaugacugccgaucc	cacagcagucauuagcaagaug	2	-	142133730	142133842	ggcucgcagcuuagcagcacuuugcuaaugacugccgauccauugcccggugcacagcagucauuagcaagaugcuguuggcuacuggcuguccccaggcuggaugcuggugg	((((.(.((((.(((((((.(((((((((((((((.(..((.......))..)...))))))))))))))).))))))))))).).))))..((((((........)))).))	-52.3	0.327945	0.145503	0.133581	0.0820828	0	0.0878035
novel_miR_612	2.3	auggugugccgugguguucca	guguuccauggugugccgugg	25	-	2938525	2938635	ggucuuccaugaugugccauaaugugcagcuuggugugccgugguguuccauggugugccgugguguuccauggugugccgugguguuccauggugugccauaaugugucu	.(((......)))............(((...(((((((((((((....((((((((((((((((....))))))))))))))))....)))))))))))))...)))....	-44.7	0	0.0970019	0.400743	0.205207	0.263407	0.263411
novel_miR_625	1.9	aaugggaugugucucuguguugu	augcagagucgcauucugcuug	4	-	66211070	66211181	agccauuagcacauagcagugacaccaggcaugcagagucgcauucugcuugcaguguuuugcucgccaaaugggaugugucucuguguugucaguguucuccucugcucaa	..............(((((.(((((..(((((((((((.((((((((((..((((....))))..)).....)))))))).))))))).)))).))))).....)))))...	-37.5	0.140548	0.0970019	0.178108	0.0820828	0.0439011	0
novel_miR_775	2	ccgggaggagguguggga	gaggagcuccuuuggguu	10	-	854648	854755	aaugugggccauaagguauagaggagcuccuuuggguuucugggcuuagaagcaagagcugagaagcaugccgggaggaggugugggauagcuaccggccaccuugcu	......((((...((.(((...(.(.(((((((.(((((((.(((((........))))).))))....))).))))))).).)...))).))...))))........	-39.6	0.187397	0.194004	0.623378	0	0.0439011	0
novel_miR_26	15.4	uuuuccgacuucguacggggcgag	cccccuguacccggcgggcuaugau	2	-	32628533	32628645	ugcccgcuggccaggacuccuuccucgggcagaucccccuguacccggcgggcuaugaugcucugaggcauuuuccgacuucguacggggcgagcagccugcaggacaagacc	.(((....)))..((.((...(((((((((...((.((((((((..((((((....((((((....)))))).)))).))..)))))))).))...))))).))))..)).))	-42.7	0.234247	0.291006	0.311689	0.123124	0.175604	0.351214
novel_miR_250	2.2	ccccgucaucuccaccau	cgggauugguagcugugc	4	-	17852156	17852267	ggacugcugugggacagcaggagugugguguguuuggcgcgggauugguagcugugcccccgucaucuccaccauagcaccacaguccucacauucaucuccccagccucug	(((..((((.((((....((((.((((((((...(((.(.((((((((..((...))..)))..)))))).)))..)))))))).))))..........)))))))).))).	-43.3	0.609041	0.679013	0.712432	0.451456	0.219505	0.351214
novel_miR_842	2.2	ugcucucccucaccagugccuca	agcacugcaagagggagagagau	1	+	65490405	65490515	gauggggaaugaagaugaauugcucucccucaccagugccucaguguugaaaguugagcacugcaagagggagagagaucauggucauucuuugucccaggaacagauaga	((((((((((((..((((.((.(((((((((..((((((.((((.........))))))))))...))))))))).))))))..))))))))))))...............	-43.6	0	0.291006	0.089054	0.164166	0.219505	0.351214
novel_miR_826	0	uaacggcucagcuccagcacc	ugcugcuguuuguacuuacu	6	+	17368114	17368224	ugcuuuucacucugaaacaguaacggcucagcuccagcaccucccuccaggaccuggcaccaaggucccccuuacugcugcuguuuguacuuacucagcucaggguccacu	........(((((((...(((((..((..(((..(((((..........((((((.......)))))).......)))))..))).))..)))))....))))))).....	-27.5	0.0936986	0.0485009	0.044527	0.0410414	0.0439011	0
novel_miR_205	1.5	aaaucuggagaugcugcu	uagcaauaucuagguuuag	5	+	24483240	24483347	ugggagaauuaguauaccagcugauggcugauuuugaagaguagcaauaucuagguuuagggggcucuggaaaucuggagaugcugcucuccuucuuccuuuccccua	.((((((...((.....(((((...))))).......(((((((((...(((((((((..((....))..)))))))))..)))))))))....))...))))))...	-34.4	0.234247	0.194004	0.178108	0.328331	0.307308	0.307312
novel_miR_319	0.6	gcugaggagccacuggac	uuuguggauuauucuuggcgg	Z	+	32792446	32792555	gguagcauucugacuuugccucaucgaauugcugaggagccacuggacuguuuucugaauuuguggauuauucuuggcgguuuggagccaacaggcuuagagagcaagua	............((((.(((((.(((((((((((((((.((((...................))))....)))))))))))))))((((....))))..))).)))))).	-29.2	2.81096	0.485009	0.979594	4.22727	4.0389	3.86336
novel_miR_472	289.7	uggcuguaccaggcuagggagu	uccuuagccugguacagccaac	1	+	123942606	123942714	gaucuguuguaaugaucuguuggcuguaccaggcuagggagucacuaggaaacuccuuagccugguacagccaacagaucauuacccauuacugcuuuuccacaugggg	.........(((((((((((((((((((((((((((((((((.........)))))))))))))))))))))))))))))))))(((((...((......)).))))).	-66.6	2.10822	2.76455	2.00371	1.51853	1.62434	2.5024
novel_miR_341	0.6	acacagcgugcaacuucaaag	ucugaagcugcugcuaugc	1	-	186780610	186780721	uucuuccugggcagccccucacacagcgugcaacuucaaagagagcccacgagaggucucugaagcugcugcuaugcaaggagccccagcaccuaacggcagagcacacccu	......(((((..((.(((..((.((((.(((.(((((..((((.(((....).))))))))))).))))))).))..))).)))))))..((....)).............	-34.7	0.0468493	0	0	0.0410414	0.0878022	0.0439018
novel_miR_545	2.8	acggugauggugacugugacggu	cauggucaucgugacggu	3	-	104565892	104566003	gucguggucauggucaucaucaugaucgugcugauggucauggucaucgugacgguugugaugauggucacggugauggugacugugacggucaugaugauggugauggucg	....(((((((.(((((((((((((((((.(..((((((((.(((((((((((.(((.....))).))))))))))).)))))))))))))))))))))))))).)))))))	-59.6	0.515343	0.53351	0.400743	0.205207	0.0878022	0.263411
novel_miR_892	2.7	ucugacauggcucugcuccgcagu	ugcggggcaggcgguguggggc	10	-	2033273	2033385	cggaggagagugugcugaaaggugggcggcgguguguggugcggggcaggcgguguggggccaccgggcucugacauggcucugcuccgcagucugcuccugcgcgcugcaga	.........((.((((....)))).)).(((((((((((((((((((((((.((((((((((....)))))).)))).)).))))))))))........)))))))))))...	-57.3	4.73178	4.46209	4.23006	4.18623	4.60961	3.29263
novel_miR_498	2.8	ucuccagucugaaucaguccugc	acugauucagacuggagaaggg	17	+	1474961	1475073	guaaguacuggaaggcugcaaugaggugucccugacugauucagacuggagaagggaauggagguucucuucuccagucugaaucaguccugcccucagccugucucuacaga	.......(((..((((.((..(((((.((....((((((((((((((((((((((((((....))))))))))))))))))))))))))..)))))))))..))))...))).	-61.9	0.327945	0	0.178108	0.86187	0.39511	0.921937
novel_miR_754	0.6	aggaagaaagcucucuuggca	ccaaggaagcugccauucauu	3	-	21740926	21741036	aaucacauuuuuguugugugacuauccaaggaagcugccauucauuuguugaggaagccuugucaggaaaaggaagaaagcucucuuggcauggauagcaauuugucauug	..((((((.......))))))((((((((((.((((..(.(((.(((.((((.((....)).)))).))).))).)..)))).)))))).)))).................	-29.4	0.515343	1.01852	0.489797	0.410414	0.79022	0.965839
novel_miR_693	1.9	ccgggaggaggugugggu	gaggagcuccuuugggu	3	-	105156342	105156450	agaacgugggccaaaagguaagaggagcuccuuuggguucugggcuugaagcaaagcugagaagccaugcccgggaggaggugugggugcuacaggccacuugcuaucu	((...((((.((....((((...(.(.(((((((((((....(((((..(((...)))...)))))..)))).))))))).).)...))))...))))))...))....	-37.9	1.73342	5.1411	13.3136	1.39541	0.702417	1.40486
novel_miR_546	15.3	ucugccgggagcuguguguguca	cacagugucucguguuccuggcag	27	-	7481540	7481650	gccgcggcuccguuuccccucugccgggagcugugugugucaguauuuauagacacagugucucguguuccuggcagguggcaugcaggcucugggcaagcaccugaccag	(((.(((..((((...((.((((((((((((((..((((((..........))))))......)).)))))))))))).))...)).))..))))))..............	-40.7	0.187397	0.145503	0.311689	0.164166	0.351209	0.351214
novel_miR_539	35240.1	auagcucuuugaaugguacugc	agcgccauuuucagagcuaua	13	-	8954764	8954875	cggggagcagagccgcggccguggugcagauggcagcgccauuuucagagcuauaaacagcgucauugucauagcucuuugaaugguacugccauauguacuggaaaaacag	((.((.......)).)).((..((((((.(((((((.(((((((..((((((((..((((.....)))).))))))))..))))))).))))))).))))))))........	-45.7	575.356	474.533	567.986	529.393	502.141	437.174
novel_miR_160	2.7	aucaccaaggcugggugcuguga	ggagcagccagcuuugggaugg	18	-	9875532	9875644	gucagagcagcaagguggggaucaccaaggcugggugcugugagagccacaugcagaucggagcagccagcuuugggauggggccacuuugcugugcacaucugucauuccca	(.((((((((((((((((..(((.((((((((((.((((.(((..((.....))...))).)))).)))))))))))))....)))))))))))).....)))).).......	-57.5	0.749589	0.53351	0.935067	0.984994	0.526813	1.14145
novel_miR_784	1.8	cuggguggguggcugggc	auaguggugggugggug	13	-	13519225	13519332	gggaucuagucugcauaguggugggugggugcuuccuuaccuuuggagaugucugugcacagggagcugcuggguggguggcugggcagaguggauucauagcaucau	.(((((((.(((((.((((..(.(.(.((((((((((......((((....)))).....))))))).))).).).)...)))).))))).)))))))..........	-37.2	0	0	0.222635	0.123124	0.0439011	0.131705
novel_miR_407	1.5	auagcccuguacaaugcugcu	cagcacuguaaagaagcuga	4	+	88526004	88526114	gagcaugccucuguucuuucauagcccuguacaaugcugcuugacaugaacgcaacaaggcagcacuguaaagaagcugaaagcacagagauacagucauguccagagaag	..((((((((((((.((((((..((.((.((((.((((((((....((....))...)))))))).)))).))..)))))))).)))))).....).))))).........	-34.2	0.0468493	0.0970019	0.044527	0	0.131703	0
novel_miR_621	110.2	ugguccguacugguccguacu	uccguacugguccauacuggu	27	+	1999132	1999243	uguauagcggugcauacugguccguacugguccguacugguuuauacugguucuuauugguucuuacugguccguacugguccauacugguucuuaaugguucauacugguc	.(((((((.((....((((((..(.((((((.((.((((((....((((((....))))))....)))))).)).)))))).)..)))))).....)).))).)))).....	-26.2	1.26493	1.35803	2.18182	0.57458	0.79022	0.878035
novel_miR_124	1.6	acugagauauugcuuuagaccu	gcugcagcaauaucucggggg	11	-	10055751	10055863	caaaggacgucacucggcacacugagauauugcuuuagaccuuuuuauuucaacaauauaaaguguggcugcagcaauaucucggggguucggcugauccuuauccucgcuga	..(((((..(((.((((.((.(((((((((((((.(((.((.((((((.........))))))...))))).)))))))))))))..)))))).))))))))...........	-34.6	0.0468493	0	0.044527	0.246249	0.131703	0.175607
novel_miR_295	1.4	ccaugugucuuguuaacuguauu	ugcaguuaccaagcacacagagaa	3	-	44148868	44148979	ugugcagaagcuggggacacaccuucaagaggcugcaguuaccaagcacacagagaaggcgacauccucccaugugucuuguuaacuguauucugcuugcauuuuucccuuu	............(((((........(((((((.((((((((.((((.(((((..(.(((......))).)..))))))))).)))))))).))).))))......)))))..	-33.6	0.140548	0.0970019	0.089054	0.0820828	0.0878022	0.219509
novel_miR_813	0.1	ucaugaucuggagaaaaga	uguucuccugucagaugauu	17	+	5639461	5639569	ggagcucuuggaauguuccuuuuaugguguuuucuguucuccugucagaugauuauuaacuuugugcagaucaugaucuggagaaaagaaagcgcccgugggagagggg	.((((.........))))(((((((((((((((((.((((((.((((..(((((....((...))...)))))))))..)))))).)))))))).))))))))).....	-34.4	0	0.0485009	0	0.0820828	0.0439011	0.219509
novel_miR_675	14.3	ugggacuuuguaggccaguuga	aucucgcccgcaaagacccagc	18	-	6417084	6417195	agguccugggagccgagaacugggacuuuguaggccaguugaagacacgaaccucucaucucgcccgcaaagacccagcccucagcucgcccgaucgggcacggaucgcgau	.(((((...((((.(((..(((((.((((((.(((.((.(((.((........))))).)).))).)))))).)))))..))).))))((((....))))..))))).....	-47.2	0	0.0970019	0.089054	0.123124	0.175604	0.0439018
novel_miR_298	15.2	uuaacuucaggucugucuuugu	uucagacagaucuguuagaacc	8	-	21503009	21503117	auacuauaccacgccauuaaguuuuguuucugaaacuuacuucagacagaucuguuagaaccuguguuuaacuucaggucugucuuuguaggggucuguucauaauuga	...................((((.((.....((..(((((...(((((((((((...((((....)))).....)))))))))))..)))))..))....)).))))..	-24.4	0.140548	0.0970019	0.133581	0.28729	0.175604	0.482919
novel_miR_515	793	aaaggacggaggcggcccgcgc	cggggucgucgccgucccuucc	Z	-	44908805	44908916	ggagccugggccgaacagggaaaggacggaggcggcccgcgcggggucguucagucggggucgucgccgucccuuccccguucgacccguacccgccugagcuuccgggaag	((.(..((((.(((((.(((((.((((((.((((((((..(((((....))).))..)))))))).)))))).))))).))))).))))..))).((((......))))...	-58.6	10.1663	10.7672	8.28202	15.4316	11.1948	12.9071
novel_miR_924	8790.5	accguggcuuuagauuguuacu	uaacagucuacagccauggucg	19	-	5662834	5662945	uccucgacgucgcccgggcgaccguggcuuuagauuguuacugugcugcuggggggguaacagucuacagccauggucgccgggcccggcgcacucgcagcgcgggcggcac	........(((((((((.(((((((((((.((((((((((((.(.((...)).).)))))))))))).))))))))))))))))((((.(((.......)))))))))))..	-66.2	123.448	138.713	113.9	114.998	112.211	97.5936
novel_miR_861	0.4	caggcugguuagaugguuguca	gcauucaucugauaacugcu	3	-	31551518	31551629	cauguggauuccuaaaucugcaggcugguuagaugguugucaugcauucaucugauaacugcugaauuuuaucuuuccugaagaaaggaggacauuucaagauaacuuagga	.........((((((.((.((((....(((((((((.(((...))).)))))))))..)))).))...(((((((((((......)))).........))))))).))))))	-28.6	1131.83	1180.71	1030.04	1153.59	1235.99	1219.5
novel_miR_352	2.1	uggcaguguauguuagcuggu	cagcuaacacgcaguugcuaac	Z	-	16702859	16702969	ugccucugugugcggugggguggcaguguauguuagcugguugaaacucuugacaucagcuaacacgcaguugcuaaccugcuccacauaccuuuagcaucaaacuggaga	......((((((.((((((..((((((((.((((((((((((.((....)).).))))))))))).))).)))))..)))))).)))))).((((((.......)))))).	-41.6	0.281096	0.485009	0.489797	0.57458	0.39511	0.482919
novel_miR_618	0.7	uccgcucggcucggcucgg	gggccagcagcggccc	33	+	4752426	4752535	ggcacccggccagggccagcagcggccccaugccggcggcgcggcccggcucggcucggcucgguacggauccgcucggcucggcucggcccgguucggccccgcuccuc	((((((.((((.(((((((((((((..((.((((((.(.((.((((......)))))).))))))).))..)))))..))).))))))))).)))...))).........	-56	0.0468493	0.0485009	0.089054	0.0410414	0.131703	0.0439018
novel_miR_439	2.3	uggggcagcgcugcucuggagc	ccuggggcagugcagccugccaga	24	-	1493719	1493829	uugaaagguuaaauaugaaggcaggauugguggccuggggcagugcagccugccagaaaaacagagcccuggggcagcgcugcucuggagcugcgucuugcugauucucau	...................((((((((..(((((((((((((((((.(((..((((............))))))).)))))))))))).))))))))))))).........	-46	0.0468493	0.145503	0.267162	0.328331	0.131703	0.0439018
novel_miR_566	2.5	ugggcagccucucagugagcucu	ggcucucuguggcucagcccagc	20	-	1422855	1422967	aguuagagagagucuggugugugugugcaggcucucuguggcucagcccagcugcgguacugcauggugcugggcagccucucagugagcucugugcucccacaguguccagu	.............((((((((.(.((((((((((.(((.((((..(((((((((((....))))....)))))))))))...))).)))).)))))).).))))....)))).	-49.6	0.609041	0.145503	0.667905	0.246249	0.439011	0.263411
novel_miR_150	3.9	aacaaguguagugcucuuca	gaggagcauuggugacuugu	1	+	197159866	197159975	gauaauuagcauucuuuaccaacaaguguagugcucuucagccacagguggagaggaggagcauuggugacuuguuuucaucccagcgaugcugaaacacaaagcgugcu	.......(((((.((((...(((((((.(((((((((((..(((....)))....)))))))))))...))))))).......((((...))))......)))).)))))	-31.4	0.0468493	0	0	0	0.131703	0.0878035
novel_miR_959	2.5	uugggcugggcuugcugcguggg	cacgcugcugacccagcccacgu	2	-	986390	986502	cacccacacucagcgaaggugagaaccacgcugcugacccagcccacgucccaccccuuugcuuuggguuugggcugggcuugcugcgugggcuccuccgcagccgcucagca	........((.((((..((.(((..((((((.((...(((((((((...((((...........))))..)))))))))...)).)))))).)))..)).....)))).))..	-49.1	0.468493	0.53351	0.534324	0.492497	0.614615	0.263411
novel_miR_36	0.3	uuggacuuaucuugauggcagu	agccaucagagaaagucuucagc	5	+	14177183	14177294	aacgccaacaaggccuucacagauucaacaucugcagccaucagagaaagucuucagcagcaugagaagcuuggacuuaucuugauggcagucuauggcaguccaugaagaa	...(((.....)))(((((..((((...(((..((.(((((((.(((((((((..(((..(....)..))).)))))).)))))))))).))..)))..))))..)))))..	-35.4	0.0468493	0.194004	0	0.0410414	0.0439011	0.0878035
novel_miR_691	2.6	ugggcgcggcuguuccucuucc	cgggggaggagccgcgccgcucg	10	-	20744670	20744780	uccggggccggccgagagcugggcgcggcuguuccucuuccugcaguaccggguguggcgggggaggagccgcgccgcucguuccguugccggcuccauccgccgggguuc	...(((((((((((.((((.((((((((((.(((((((..(((((.(....).))))).))))))).))))))))).)..))))))..)))))))))((((....))))..	-66.2	0.0468493	0.0970019	0.178108	0.0820828	0	0.0878035
novel_miR_49	2	uagugaugggacuagaaacuugg	aagauccuggccccaccaccuac	15	-	2908408	2908520	uuaauuuaacaaggagacguuagugaugggacuagaaacuugggcucccggccuuccaagauccuggccccaccaccuaccucuccuuguaaauuaauacuugguaugcaaug	((((((((.((((((((.((..(((.((((.((((...((((((((...)))...)))))...)))).)))).)))..)).))))))))))))))))................	-39.8	0.187397	0.145503	0.089054	0.451456	0.351209	0.263411
novel_miR_336	1.1	uagaaucguggaauggcuugg	aaaccauucuaugauucuaug	1	+	134823031	134823141	cugaacuagaugaucuugagggcuccuuccaacccaaaccauucuaugauucuauguaauacauaaacuguagaaucguggaauggcuuggguuggaaagggccauaaaaa	....................(((((.(((((((((((.(((((((((((((((((((.........)).))))))))))))))))).))))))))))).))))).......	-52.1	0.0468493	0.0485009	0.089054	0.0410414	0.131703	0.131705
novel_miR_132	1	cugcaguugaacauggga	ccaguuuaauuacaggc	6	-	27148420	27148527	acaauucuucaguuuuucaaccaguuuaauuacaggcaaccuaaucagagaaguucacucugcuugaugucugcaguugaacaugggaauaccccacugaagcucagc	......(((((((.......(((((((((((.((((((...(((.(((((.......))))).))).)))))).)))))))).))).........)))))))......	-31.2	0.187397	0.0970019	0.178108	0.123124	0.263407	0.175607
novel_miR_327	28.7	acggagcagaacugaucacugu	agugugucgguuuaguuccuugu	1	+	111914500	111914611	aauggcaccgaaggucugcaccugacccucuguagugugucgguuuaguuccuuguccaugcugaagagcacggagcagaacugaucacuguaggagguaaaggauggaaag	....(((((...)))..)).(((...(((((.(((((.((((((((.(((((.(((.(........).))).))))).)))))))))))))..)))))...)))........	-35.9	0.327945	0.0485009	0.089054	0.451456	0.39511	1.36095
novel_miR_622	2.4	auugacuucagugggagcu	cuccuacugaagucaaugc	6	+	32121774	32121883	ccugccaauccgaggggaaaaugucuggaggcugagccaacuccuacugaagucaaugcugaaaugcccauugacuucagugggagcuggauuggacuccaaaaaagaaa	........(((....))).......(((((.((((.(((.(((((((((((((((((((......))..))))))))))))))))).))).)))).))))).........	-46.9	0.187397	0.0970019	0.044527	0.123124	0.219505	0.0439018
novel_miR_199	42	caggaacaacugaagugaauu	aaccaccucaguuguuucuacc	8	+	24933718	24933827	cauccucagcuucaaagauuugacauuggaagaaccaccucaguuguuucuacccuuucuguaaagcaggcaggaacaacugaagugaauuuuuucaaugccagaccaaa	..................((((.(((((((((((.(((.((((((((((((.((((((....))))..)).)))))))))))).)))..))))))))))).)))).....	-34	0.843288	0.582011	0.935067	0	0.658516	0.219509
novel_miR_122	1.7	gggcagugaugugaucugagcucu	agcuguuguuucacuuucuuuucccug	26	+	2474668	2474778	cauguuugcuuugggguuuuauugcucccagagcuguuguuucacuuucuuuucccugcugagugcugcggggcagugaugugaucugagcucugcugccuuuggcccugu	............((((((.....((...(((((((......((((..((.((.((((((........)))))).)).)).))))....)))))))..))....))))))..	-35.8	0.234247	0.242505	0.133581	0.164166	0.131703	0.0878035
novel_miR_721	0.8	agagaaucauagaauggccuga	gggaccucuaggaucaucaag	2	-	128742737	128742848	aauguugggcacuuuguauuagagaaucauagaauggccugaguaggaagggaccucuaggaucaucaaguuccaacuccccugccacaggcaggguuaaacacaaaaacag	...((((((.((((.......((..(((.((((..(((((.........))).)))))).)))..))))))))))))..(((((((...)))))))................	-30.1	0.140548	0.194004	0.267162	0.0410414	0.0439011	0
novel_miR_283	0.1	aucuuaguucagcagcuguagcu	uuacagcaccugggcugaugu	4	+	4354408	4354519	caucauuaucuuuauuuuaacuacauacugcaauuuguagcccauuacagcaccugggcugauguaacucaucuuaguucagcagcuguagcuuuuuauggugcugguuaaa	...............(((((((((((.(((((...)))))....(((((((..(((((((((((.....))))..)))))))..))))))).........))).))))))))	-27.6	0.0468493	0.291006	0.133581	0	0.0439011	0.0439018
novel_miR_953	2.2	cacagaauugugggauggcuga	uucuaugauucugugaugaua	2	-	95592661	95592772	cuggguuggcuuuaagaucccuuccgaccuaagucauucuaugauucugugaugauaaagaaucacagaaucacagaauugugggauggcugagguuggaaggaaccuccug	..(((((............(((((((((((.((((((((((((((((((((((................)))))))))))))))))))))).))))))))))))))))....	-52.1	0.0468493	0	0.133581	0.164166	0.0439011	0.0439018
novel_miR_13	0.6	aaguagcggucuggaugucugugcu	uucagacuucagaagcgcgcuugg	2	+	107321999	107322111	aaucauguggaauuucuucaaguagcggucuggaugucugugcuuauuuuauuuacaaugaaauucagacuucagaagcgcgcuugguuuucuucuuuugugaugcugacaaa	.((((((.((((.....((((((.(((.((((((.(((((.....((((((((...)))))))).)))))))))))..))))))))).....))))..)))))).........	-29.4	0.0468493	0	0	0	0.0878022	0.395116
novel_miR_639	0.2	augcagaacaguuuucuggacu	uccugaaaauuguaucgcaugg	10	+	13087369	13087480	cugacaugagaauuuucugaagucuuugauccugaaaauuguaucgcauggguaaagcacagcacugcccaugcagaacaguuuucuggacugagaccuuagacugaaaaua	...............(((((.(((((.(.(((.(((((((((.(((((((((((..((...))..))))))))).))))))))))).)))).))))).))))).........	-40.8	0.0468493	0	0.044527	0.205207	0	0.0439018
novel_miR_180	2.5	gaaccguuaccauuacua	caguaaugguaacgguuu	19	+	6010666	6010773	ugcaugccuggcugucagcagaaccguuaccauuacuaaacucaguaaugguaacgguuucccugccagccauguguccuuggcugcauccgcuccucagggugcccc	...((((.((((((.(((..(((((((((((((((((......)))))))))))))))))..))).)))))).))))....((..((((((........)))))))).	-52	2.76411	2.08554	2.49351	6.07413	4.34621	3.95116
novel_miR_859	1.8	gcagaucguuccgagcuucuggug	cgcucguuuccgaucuccc	3	+	88184026	88184134	cgcgcagcgcggcgccgagcgcagaucguuccgagcuucuggugcugcucgccgcucguuuccgaucucccucgcuacucggggccggcaugggguugcugucgcaggg	.((((((((((((.(((((.((((((((...(((((....((((.....)))))))))....)))))).....))..))))).)))).........))))).)))....	-44.7	0.0468493	0	0.044527	0	0.0439011	0.131705
novel_miR_328	0.3	uucaagaucuuacuguugcuggaa	ccagucagguaagcucuuucuca	3	+	75118192	75118305	acagcagaggcgcagauccauucaagaucuuacuguugcuggaacagaguccagucagguaagcucuuucucaucccuucauuauguuucaauaaagucagugcuguaugcaua	...(((..(((((.(((......((((.((((((...((((((......))))))..)))))).)))).............((((......)))).))).)))))...)))...	-28.3	0.0468493	0.0485009	0.089054	0.410414	0.0439011	0.307312
novel_miR_740	0.8	auagagauguagggucagauu	ucaacuuuugggcuccuaugg	18	-	11291594	11291707	gggucaacuuuugggcuccuaugggaccacauuugggauccuugguguuccaccaugucccaguuguuccccauagagauguagggucagauuuugggguccuuugggauccuu	(((((.(((((....(((.((((((...(((.(((((((...(((((...))))).))))))).)))..)))))))))....)))))..))))).(((((((....))))))).	-43.5	0.0468493	0.145503	0	0	0.131703	0.219509
novel_miR_62	112.3	ugaggagcucugcaagcaugc	auguuuacagggcucuucauu	2	-	103792003	103792113	auacuguaacauccaaugggcuugguuuuauuacauguuuacagggcucuucauuguggucucagcaauaugaggagcucugcaagcaugcaauaaaaacugaacagacuu	...((((.....((((.....))))(((((((.(((((((.(((((((((((((..((.......))..))))))))))))).))))))).))))))).....))))....	-38.1	1.26493	1.21252	0.489797	1.23124	1.36093	0.965839
novel_miR_311	1.1	cucagcaccgcgccgccac	ggcggcgcggugacgucaggcg	7	-	22075102	22075210	ccucgaggccccgcccccuuccggcgaggccccgccccggcggcgcggugacgucaggcggagcuguccgcucagcaccgcgccgccaccaugcgcgggggccggggcc	......((((((((((((....((((......))))..((((((((((((.(....((((((....))))))..))))))))))))).........))))).)))))))	-70.6	0	0	0	0	0.351209	0
novel_miR_10	2.5	uaaggcacugcugagccagagg	uuuguguuugcacagccaggua	14	-	4905288	4905398	cugcccuggcugcaggaagguaaggcacugcugagccagagggcagcaucuugaguuuggcugcacuuuguguuugcacagccagguauuuugcagcacagggcuauuuau	..(((((((((((((((......(((..(((.(((((((((.(((((............))))).))))).)))))))..))).....))))))))).)))))).......	-49.2	0.234247	0.291006	0.222635	0.0410414	0	0.0439018
novel_miR_432	0.1	aauggggacgucuuuaug	uggggacaucguuauggg	1	-	90912811	90912920	caauggggacaucguuauggggucaccccaauggggucaccucaauggggucaccucaauggggucaccgcaauggggacgucuuuauggggucaccacaauagggacau	(.((((((((.((.(((((.(((.((((((.((((((.(((((...))))).)))))).)))))).))).).)))).)).)))))))).).(((.((......)))))..	-50	0	0	0	0	0	0.0878035
novel_miR_848	6.1	uucccaaguacguugguaguc	acuccaaacaugccugggaagc	4	-	63070116	63070227	agguacggagcucauugcugacuccaaacaugccugggaagcuuuaguaaaugaauaaaaauucccaaguacguugguagucagcacuaaucuccaugacugugcaaguuuc	..((((((((.....((((((((((((.(.(((.((((((..((((.........))))..)))))).))).))))).)))))))).....))))......)))).......	-36.8	0.0936986	0	0.044527	0.0410414	0.0439011	0.0878035
novel_miR_716	1.7	gaaagaucucugagcaucacc	ugaggucucggggaaucugauccu	9	+	1288811	1288921	uccaugaaucccuguccuguuuaugaugaggucucggggaaucugauccuguucuucauagcugucccaggaaagaucucugagcaucaccagcucaggacaaagaucaac	....(((.((..(((((((....((.(((.(.((((((((.(((..(((((................))))).)))))))))))).))).))...)))))))..)))))..	-36.2	0	0	0	0.0820828	0.0439011	0.263411
novel_miR_660	14.6	uggcuuuccaugacagguug	uaucuguccuugugagccccaga	4	-	8508598	8508710	agagacuggcagugcugagugcagcucucucccuggcuuuccaugacagguugguaccucucauccuuccuaucuguccuugugagccccagagugagugcugcugugucucu	(((((((((((((((.....)))((((.(((...(((((..((.(((((((.((..............)).)))))))..)).)))))...))).)))).)))))).))))))	-42.1	0.0468493	0.0485009	0.133581	0	0.0878022	0.0439018
novel_miR_543	1.9	aauugcacgguauccaucugua	guggaucacgaugcaauuuuga	4	-	3967197	3967308	gcacgguaagcuuuguuuugcuguugucggguggaucacgaugcaauuuugauuaguuuaguaggagaaaaauugcacgguauccaucuguaaaccgcaagaccuucauccg	...(((........(((((((.(((..(((((((((..((.(((((((((..(((......)))....)))))))))))..)))))))))..))).)))))))......)))	-38.4	8119.88	8047.71	5788.02	8231.92	8295.11	8801.51
novel_miR_403	2.5	ccgcugcaugagcucuuc	ggagcugcaggagcu	32	-	186769	186879	gcagccgcugcaugagcucuucccggagcugcaggagcugcccagcaggugggggggaugggauggccccguuggccccauguccccauuuccucccguccccauaacguc	(((((..(((((...(((((....))))))))))..)))))......(((((((((((.(((((((((.....))))....)))))...))))))))).))..........	-51.9	0	0	6.18925	12.2303	4.60961	2.98532
novel_miR_329	4	ccgcgccccgccucggcu	ccgggcggggcgggcggcg	12	+	1100495	1100603	cgccgcgccgcgcgagggggccgggccugggccgccgcgccccgccucggcugaggggcccggggcggugccgggcggggcgggcggcggccccucggcgcggccccgc	(((.((...)))))..(((((((.(((.((((((((((((((((((.((((......(((...)))...))))))))))))..))))))))))...))).)))))))..	-86.2	0	0.145503	0.178108	0.0820828	0	0
novel_miR_512	1.1	uagauguucaagaaccaacaga	ccuugguuuuuguacaucaagc	5	-	58863053	58863164	gaacgcucucaugggugcuguagauguucaagaaccaacagaagcuguuuguucccuugguuuuuguacaucaagcaucucccugggcacaaaugugaugcagaagagugac	...((((((...(((((((...(((((.((((((((((..(((........)))..)))))))))).))))).)))))))..(((.((((....))).).))).))))))..	-39.4	0.0468493	0.145503	0.133581	0	0.0439011	0.0878035
novel_miR_967	49.4	cauagcuuggaacccugaagc	aucagggcuccacagcugaacg	30	+	419053	419164	gauggugcugagcucggggcaucagggcuccacagcugaacggcuccacgcauaacacgcauagcuuggaacccugaagccugccucaaacuuaaugacagcuggaacguag	...(((..((((....((((.((((((.((((.(((((..((...............))..))))))))).)))))).))))..)))).)))....................	-34.1	0.609041	0.242505	0.267162	0.246249	0.39511	0.614625
novel_miR_708	2.6	uuuaucacaucaaugccaagcag	uugcuggcagugcugugguagug	Z	-	8585241	8585353	agccuugcagcagcucuugguuuaucacaucaaugccaagcagguaugacagggaaauacuugcuggcagugcugugguagugccagggguuaguuguguggugcuaggucuu	.(((..(((((((((((((((((((((((.((.(((((.((((((((.........))))))))))))).)).)))))))).)))))))))).)))))..)))..........	-52.2	0	0.0485009	0	0.123124	0.175604	0.307312
novel_miR_231	0.6	uguugggaaugaauacauauugu	acauauggucaauucccaucacc	5	-	1205471	1205583	cuauuugugucuucaggcuuuguugggaaugaauacauauuguucugcaaacacauauggucaauucccaucaccuccugaggcagacuagagaucuucaacagaugaaacca	(((..(.(((((.((((...((.(((((((.....(((((((((.....)))).)))))....))))))).))...))))))))).).)))...((.((....)).)).....	-29.2	0.515343	0.388007	0.44527	0.123124	0.921923	0.74633
novel_miR_679	0.6	cagugcuguggcuguuccuucugug	cagagggaagaucagugcgc	4	-	12495148	12495262	guggccuugggaaauaaucugucucagagggaagaucagugcgcgcuccagagcuugcccuugucccgugcagugcuguggcuguuccuucugugcucagcccugagagcagcag	((.((((((((.......(((.(.(((((((((...((((((((((....(((......))).....)))).))))))......))))))))).)..))).)))))).)).))..	-34.7	0.140548	0	0	0	0	0.131705
novel_miR_207	1	agagagauguggcucugu	agugucgccucucucauu	1	-	54469857	54469967	auuauacuucagaaugcagagagauguggcucuguucuaauaaccucagucuggauucagugucgccucucucauuuauuucuggugcagauaugcucaggacagcuuucu	..........((((.((.((((((.(((((.(((.((((...((....)).))))..))).))))).))))))......((((((.(((....)))))))))..)).))))	-30.8	0.0936986	0.0485009	0.133581	0.123124	0	0.131705
novel_miR_601	93.8	cugagccccguuacccugcagg	gugcagugcuggggggcacagcg	12	-	3006455	3006565	gcuggaugagagcgagagcuacaggugcagugcuggggggcacagcggggacguccuucccgucccaccgcugagccccguuacccugcaggccgcugcccacguuccguc	....((((.(((((.(.((....(((((((....(.(((((.(((((((((((.......)))))..)))))).))))).)....))))..)))...)).).)))))))))	-51.2	0.796438	1.60053	2.04824	1.60062	1.00973	1.18535
novel_miR_222	0	gguuguuuggcuccugauc	cugugcagccuggagcca	10	+	2107355	2107462	ugguuugcaguaacuggaugguuguuuggcuccugaucggugguggcauuuaaugcagaugagugcugccuguugcugaaccauccugugcagccuggagccauccug	.((((......))))((((((((.(..((((((.((((((((((((((((((.......)))))))))))....)))))....))..).).)))).).))))))))..	-34.5	0.0468493	0.0970019	0.133581	0.0820828	0.0878022	0.131705
novel_miR_163	0.2	ccgacauggagcugcugcaac	ugugagugcuccuggaca	28	-	4922523	4922633	ugauguuggcaguugauuuugagugugagugcuccuggacaaagccccgcagugcccucugcuggcagcaccgacauggagcugcugcaacugaacugccguuaaaacuuc	...((.(((((((......(.(((...(((((((((((.....(((..((((......)))).)))....)))....))))).)))...))).)))))))).)).......	-32.2	0.0936986	0	0	0.0410414	0.131703	0
novel_miR_182	1.2	ugugagauaccugaaauagc	uauuuuucaguaccucacauu	1	-	154483962	154484071	gcagugauccugagauguucugugagauaccugaaauagcaguaaguacuucugcuauuuuucaguaccucacauuugcugaguacugaacaacauggcugaugugaugu	.(((((...((.((......((((((.(((..((((((((((.........))))))))))...))).))))))....)).)))))))....((((.((....)).))))	-31.9	0.234247	0.0485009	0.133581	0.0410414	0.0878022	0.0878035
novel_miR_285	2.3	ucagcugcucugagccccagc	ugaggcuuaguguggagcugugc	12	+	10268003	10268110	cgcugaucugagugcucccauguccugcuggggcugaggcuuaguguggagcugugcuuacuccugcugcucagcugcucugagccccagcugggucuguggccucuc	((((......))))...(((((.((((((((((((.((((..(((...((((...((........)).)))).))))).)).))))))))).))).).))))......	-44.6	0.187397	0.145503	0.222635	0.0820828	0.0439011	0.0439018
novel_miR_688	0	aaagagucugcuguauacuuuggc	cauguauacggugauucuuuaa	1	+	172350320	172350433	uaacauguauacggugauucuuuaacaauuuuucacucuuugauuauccuuggcugagagagagauaacaaaagagucugcuguauacuuuggcauggaaauauuuccauaacu	...((.(((((((((((((((((....(((((((.(((.................))).)))))))....)))))))).)))))))))..))..((((((....))))))....	-30.7	0.0468493	0	0	0.164166	0.131703	0
novel_miR_651	2.4	acuucaggauccaaggauuuca	agagauccuuguccuguagucg	1	-	113380595	113380706	acguagauuccagcacuccacuucagagauccuuguccuguagucggauuauccaaugcaggcugcagcgacuucaggauccaaggauuucagugguguuggugugaguccu	.....(((((((.(((.(((((...(((((((((((((((.(((((......((......))......))))).)))))..))))))))))))))).).)).)).)))))..	-46.3	0.374795	0.630512	0.400743	0.164166	0.439011	0.439018
novel_miR_670	2.5	uuguaggagugcugaucugcagc	uguaggagugcugaucugcagcc	22	-	1434902	1435014	ugauccucagcccuacagagcccauaggguuguaggagugcugaucugcagcccuacagagcccauaggguuguaggagugcugaucugcagcccuacagagcccauaggguu	.........((((((..(.(((..((((((((((((((((((..((((((((((((.........))))))))))))))))))..))))))))))))..).)))..)))))).	-51.6	0.140548	0.0970019	0.133581	0.164166	0.131703	0.175607
novel_miR_48	2.1	guagugcuuucuacuuuaugg	ccauaaaguaggaaacacuac	19	+	697431	697542	ucucuucuccguagcccacaguacacucauccauaaaguaggaaacacuacacccugcagugcuguuuaguagugcuuucuacuuuaugggugacugcacugucucucaguc	.................(((((.((.((((((((((((((((((.((((((.....(((....)))...)))))).)))))))))))))))))).)).))))).........	-40.8	0.187397	0.194004	0.044527	0.0410414	0.175604	0.0878035
novel_miR_758	190.5	acuugacugcaggcacugcugc	uggcaguuccuuggucuugucc	12	-	11048686	11048797	gccucugcuggaagccggguacuugacugcaggcacugcugcucuguuccagauuggcaguuccuuggucuuguccuugucuccaguuccuuccuaagagauaaaggaaagg	......((((((.((.(((.((..(((((.(((.(((((((.((((...)))).))))))).))))))))..))))).)).)))))).(((((((.........))).))))	-41.9	2.76411	1.60053	4.85344	2.01103	2.89747	2.32679
novel_miR_467	2.4	uuucggcuguuuccggcgacugc	uuccggaaaucgccgaagcga	2	-	32194019	32194131	agugccgcuuucgucggugucggcugauuccggaaaucgccgaagcgagccgaacgcgcugccauuucuguuucggcuguuuccggcgacugccgaagcggauaagcucggcg	..((((((((..(((.((.(((((.....((((((((.(((((((((((((....).)))........))))))))).)))))))).....))))).)).)))))))..))))	-48.7	3.46685	3.20106	2.40446	2.05207	2.59016	2.5024
novel_miR_974	1	uggggacccaaauaccgugagc	ccgcacuccucgagguccccaau	22	+	1551494	1551604	cuccaaugccacgcucucuggggacccaaauaccgugagcuuuggggucccccauggcacaguuuaugggguccccauugccgcacuccucgagguccccaauggcgcagu	...........(((.(..(((((((((.......(((.((..(((((..((((((((......)))))))).)))))..))))).......).))))))))..))))....	-48.9	0.0468493	0	0	0.0410414	0.175604	0.0878035
novel_miR_127	0.8	agcaacguggagauccugca	caccuccacgagagcugc	28	+	1322985	1323094	uggcggugggcauggagagcagcaacguggagauccugcacgucaccaagcccgacaaguaccagcugcaccuccacgagagcugcguccucucccucaaguucgccgcc	.((((((((((..((((((((((..(((((((....((((.((.....................)))))).)))))))...)))))....))))).....))))))))))	-42.8	0	0	0.044527	0	0	0.0878035
novel_miR_767	15.8	uaacuuccugaaaacugcuggu	uagcagauguuuaggaaugugccuucuc	2	-	19801186	19801297	cagcucucggcuuggauugagggcuguuuggacuagcagauguuuaggaaugugccuucucaaaacaagauaacuuccugaaaacugcuggugugaaacaacacugcuguca	((((((((((......))))))))))((((.((((((((...((((((((.((....(((.......)))..))))))))))..)))))))).))))...............	-36.5	0.187397	0.339506	0.133581	0.0410414	0.263407	0.0878035
novel_miR_491	2	cggcuucucgguaccugcguu	cgugguuacaaggggagccuggg	18	-	10590764	10590874	gaucuggaaugucguccaguuacugggaagcgugguuacaaggggagccuggggggaaaggaaugaaacccggcuucucgguaccugcguucaccaaagagaucguuucag	...((((((((..(((...((..(((..(((((((.(((..((((((((.(((...............))))))))))).))).)))))))..)))..)))))))))))))	-39.2	0	0.0485009	0.044527	0.328331	0.131703	0.175607
novel_miR_368	2.2	ugcggggacauugggagccauu	uggcauugggugucccucaaug	30	+	555400	555511	auuggguggccuuuggcauugggugucccucaaugggguccauugucccuccugauggcacucagagcucugcggggacauugggagccauuggugucacucaacaccaucc	.(((((((((((.((((.((.(((((((((....(((.((....((.((.......)).))...)).)))...))))))))).)).))))..)).)))))))))........	-43.4	0.0936986	0.242505	0.267162	0.205207	0.0878022	0.0878035
novel_miR_465	34.4	ugcguggaucugugggucgcugugu	cacauuggccucuccccgcagc	KZ626833.1	-	158132	158246	gugugggucuggggggggucugcguggaucugugggucgcugugugggucugacccacacauuggccucuccccgcagccccuucgaggugcagguggccccggcggggggcgcc	...((.((((.(((((((.(((((.(((.....((((((.(((((((((...))))))))).)))))).))).)))))))))))).)))).))((((.((((....)))).))))	-70	0.0936986	0.242505	0.133581	0.123124	0.0878022	0.175607
novel_miR_102	1.1	ccugaagagcucccggcc	uugggguucgaguucggguu	1	-	1393912	1394020	cucggacuccuuccguuguccccugaagagcucccggcccuugggggggggcugcgcugggggcugccccauucgggcccuccccgcguugggguucgaguucggguuc	...((((..........))))((((((((((.((((((...(((((((((.(((...(((((....)))))..))).))))))))).))))))))))...))))))...	-57	0.0936986	0	0	0.123124	0.175604	0.307312
novel_miR_946	14.8	ugguggggcuucuagaucugcaugu	agcagcuguagagucccccucu	2	+	37554255	37554369	gaacauuuuuuucagugaaauuucacagugaggacagcagcuguagagucccccucugugugugguaaugugguggggcuucuagaucugcaugucugagggcugugcauuuguc	...((((......))))......((((((..(((((((((.(.(((((((((((.(.............).)).))))).)))).).)))).)))))....))))))........	-37.2	0.140548	0.145503	0.089054	0.28729	0.175604	0.0878035
novel_miR_289	0.3	uggacguggccgccauguugga	ggacauggccgccauguuggac	14	+	5259110	5259221	ggacguggccgccauguuggacauggccgccauguuggacguggccgccauguuggacaugacugccauguuggacguggccgccauguuggacauggcugccauguuggac	.((((((((.((((((((.((((((((.((((((((.((((((((.(.(((((...))))).).)))))))).)))))))).)))))))).)))))))).))))))))....	-77.6	0	0	0.044527	0	0.0878022	0
novel_miR_516	0.2	ucugucaugagaagucucac	cagauuucucaugaagaggaa	2	+	54492310	54492420	gagguugguaauaguaaacagccauuaagguuucugauaacagauuucucaugaagaggaacaggaagguuucugucaugagaagucucacgaccugccucucccuuuugg	(((((.(((..........((((.....)))).........(((((((((((((..((((((......)))))).)))))))))))))....))).)))))..((....))	-35.1	0.140548	0.0485009	0	0.123124	0	0.0878035
novel_miR_655	2.4	gugcuucagcucuguucagu	acugaggagggucugaggcugacuc	4	+	81847180	81847289	uagagagagagugugaagcuccccugguacugaggagggucugaggcugacuccugcacccacugcuugagugcuucagcucuguucaguagcagcagccuucauccuug	........(((.((((((((...(((.(((((((.((((.(((((((..((((..(((.....)))..))))))))))))))).))))))).))).)).)))))).))).	-48	0.0936986	0.0485009	0.044527	0.164166	0.219505	0.395116
novel_miR_28	0.8	auggggcgcuguggggcagag	cugggaucuauggggcgcugugg	22	+	3571561	3571671	auggggcugggaucuauggggcugggaucuauggggcgcuguggggcugggaucuauggggcugggagcuauggggcgcuguggggcagagcuauggggcugggaucuaug	((((..((.((..((((((..(((...(((((((.((.((((((..((.((.(((...))))).))..)))))).)).))))))).)))..))))))..)).))..)))).	-41.9	0	0.0485009	0.089054	0.0820828	0.175604	0.219509
novel_miR_571	24	ugcuuucgcuugcucuguggga	uugcggagcggcugacugagcgca	2	-	111202633	111202744	ucgcacugucuuguuuugagaacgcuguuuucuugcggagcggcugacugagcgcacgcugcuuucugcgugcuuucgcuugcucugugggaaaacggcgugccuuucuuuc	.................(((.(((((((((((((((((((((((.....(((.((((((........)))))).))))).)))))))))))))))))))))..)))......	-47.8	0.187397	0.0485009	0.222635	0	0	0.175607
novel_miR_401	545.1	cuauacagucuauugccuuccu	ugagguaguagguuguauaguu	26	-	1650699	1650810	ugcucuguggaggugagguaguagguuguauaguuuggugggagggauucugucccauuucaggugauaacuauacagucuauugccuuccuuaaagagcagcaauaccacc	((((((...((((.(((((((((((((((((((((...((((((((((...))))).)))))......)))))))))))))))))))))))))..))))))...........	-48.1	3.5137	5.4321	4.00743	4.43247	3.68769	4.17067
novel_miR_316	2.1	caaccgguuuguagggaucugca	cagauccguaugcugauggc	3	+	110775708	110775820	uuccuuuugugcuuuuugcaggcaguauacuugcuguuaccacugcagauccguaugcugauggcaaaaccaaccgguuuguagggaucugcauucaaagaggaggaagaggg	.(((((((.(.(((((((...((((((....))))))......(((((((((.(((((((.(((.....)))..))))..))).)))))))))..)))))))..).)))))))	-40.2	0.327945	0	0.222635	0.410414	0.219505	0.526821
novel_miR_611	3337.2	gcucugacaauguugcacuacu	cagugcaauaauauugucaaagcauu	15	-	702317	702426	uggcugcugguaucgcuggcucugacaauguugcacuacugucugcacaaauaaagcagugcaauaauauugucaaagcauuugguuccaguccuuauacauccucauga	.((..(((((.((((...(((.(((((((((((((((.((..............)).))))))...))))))))).)))...)))).)))))))................	-31.9	18.1307	20.2734	23.2876	18.5507	20.414	16.9461
novel_miR_541	0.2	aacuauucugugauucugugauc	uuggagacucugcaugaacaggaca	18	-	446177	446290	ucuuggagacucugcaugaacaggacagguuggaucaugggaccucgaggggucccugucuaucugaacuauucugugauucugugaucccaugacuguaaaaugauagucuag	..(((.(((.((.(((.(((.((..(((((.(((.((.(((((((....)))))))))))))))))..)).)))))))).))).)))......((((((......))))))...	-34.9	0.421644	0.0970019	0.267162	0.205207	0.39511	0.307312
novel_miR_527	0.2	cacccgagucuguguuguugaugc	auccagcagaacacaggaccaggaggcu	8	+	27513773	27513886	acuugcguggcuuacaaauccagcagaacacaggaccaggaggcugccuaccaaaaggcugcuuuuuuuucacccgagucuguguuguugaugccaacaugauacugaugcaac	..(((((((((.........(((((..((((((.((..((((((.((((......)))).)))).........))..)))))))))))))..))))............))))).	-28	0	0	0	0.164166	0.0439011	0
novel_miR_810	4.1	cccgagauguugugugcuccugaca	gcacggagaugcaggcucuuug	2	-	136010118	136010230	ugugaccuucugauugccagucagauuaaugcacggagaugcaggcucuuuggguuaaggcuguaaagcccgagauguugugugcuccugacagcuauuacuguugcagcagc	.........(((.((((((((..(((...((((.((((((((((..((((.(((((..........)))))))))..)))))).)))))).))...)))))))..))))))).	-31.1	0.140548	0.0485009	0.089054	0.123124	0.131703	0.0439018
novel_miR_74	0.5	uuuucuuccucuuccucaacaga	ugugagggagugugaaaaca	24	-	4455771	4455882	aaaggguaaaaucaaauaugcuugugaguugugagggagugugaaaacauguuggaggugacacugacacuguuuucuuccucuuccucaacagaaguggcaugaggacuac	................((((((......(((((((((((.(.(((((((((((((.(....).)))))).)))))))...).))))))).))))....))))))........	-30.3	0.187397	0.145503	0.133581	0.0410414	0	0
novel_miR_265	0.7	ccgugugcaggaccuggauggcu	cccuccaaggcauguagagac	1	-	187881520	187881631	aagaaggauuacaguuuguccgugugcaggaccuggauggcucuaaugagcccuccaaggcauguagagacauagcugacucaugucccuugggagagugaagugaagccca	...........(((((((((..(.((((.(.((((((.(((((....))))).))).)))).)))).))))).)))))((((((.(((....)))..))).)))........	-35.1	0.0468493	0.145503	0	0.0820828	0	0.175607
novel_miR_240	321.1	ugacaucauauguacggcugcu	uggucguauguaugacgucauu	2	-	23119330	23119441	auaacagucauuugucacgugguggcuugguggucguauguaugacgucauuuacuuggacuuuuaggagugacaucauauguacggcugcuaaacugcugcaugggacauc	............((((..(((((((.(((((((((((((((((((.((((((..(((((....))))))))))).))))))))))))))))))).)))))))....))))..	-42.6	1.45233	5.4321	8.32655	1.76478	8.99972	1.44876
novel_miR_615	4.8	cauaacccccucugaccccacag	uuggggcagauuuggguggcuuug	33	-	6572553	6572665	ugggcagauuugaggucauauggggccauuuuggggcagauuuggguggcuuugggggcagcuuccaccccauaacccccucugaccccacagagggugcacuucaugccaga	..((((....((((((......(.(((.((((((((((((...(((.((...(((((..........)))))...))))))))).))))).))).))).)))))))))))...	-45.1	0.187397	0	0	0	0.131703	0.263411
novel_miR_147	292.2	uaccgcuguccugggugccugg	uggcauccagaacagcgguac	5	+	16028807	16028918	uucaggagggcaguguuggguaccgcuguccugggugccuggcagagcucgugcacuggcauccagaacagcgguacccaagguugcucacgugcuacuggagcaugacggc	.......(((((((.((((((((((((((.(((((((((.((((.......))).).))))))))).)))))))))))))).))))))).((((((.....)))))).....	-65.4	2.06137	2.57055	1.87013	3.61165	4.1267	3.55604
novel_miR_198	2.1	acgugugccagugccugag	caggcagugacacagagcu	6	+	35703648	35703755	gggguugcacagaucuguguuucccagcccacucugcaggcagugacacagagcugcagcccuguggccaacgugugccagugccugagugccuuaaauauggcagaa	.(((..(((((....)))))..)))........((.((((((.((.((((..((((((....)))))).....)))).)).))))))))((((........))))...	-41.7	0.0936986	0.0485009	0	0.123124	0.131703	0.131705
novel_miR_137	44.2	uugggucagcggcaccauugggu	ucaauggcaccguuggguca	2	-	131049527	131049639	ccauugggucaacagcaccauugggucagcggcaccauugggucaacggaaccaauacagaaccgauauggcacccgugggucaauggcaccguugggucagcgguaccauug	......(((.......(((.((((.(((((((..(((((((.(((.(((..(((..............)))...)))))).)))))))..))))))).)))).))))))....	-38.4	0.281096	0.485009	0.133581	0.0410414	0.307308	0
novel_miR_715	0.7	gauuuuguagcugacuucacaga	agugaggucagcuacaaaaucca	2	+	56242885	56242993	agggcuucagugaggucagcuacaaaauccauggccuuaugcaaguacuuuagcaugugauuaccucauggauuuuguagcugacuucacagaagccaugugaacaucg	..((((((.(((((((((((((((((((((((((...(((((..........)))))........))))))))))))))))))))))))).))))))............	-54.6	0	0.194004	0.133581	0	0	0.0439018
novel_miR_497	2.5	ugcccaggcugugcugugcucu	cuggcacacagccugggagcag	21	-	1744554	1744665	accugccgugagaaccccagugcccaggcugugcugugcucugggggcacgcucagcucuuccccuggcacacagccugggagcagggaguccucgccucuugccucgaguu	.......(((((.(((((.((.((((((((((...(((((..(((((...((...))...))))).))))))))))))))).)).))).)).)))))(((.......)))..	-52	2.10822	2.18254	1.91466	1.1902	0.79022	1.14145
novel_miR_694	2.2	uugggucagcggcaccauugggu	gcaccguugggucaauggcacu	2	-	131050535	131050645	ccguugggucaaugacaccguugggucagcggcaccauugggucaacagaaccaauacagaaccgauauggcaccguugggucaauggcacuguugggucagcggcaccau	(((((((.((((((...(((((((.(((((((..(((((.((((...............).))).).))))..))))))).)))))))...)))))).)))))))......	-43.2	0.281096	0.485009	0.133581	0	0.263407	0
novel_miR_633	2.8	ucuguagcauauaccagugaac	ucacugguauaugcuacagauu	1	+	6251508	6251619	ccauuucugaaagacggauguucacugguauaugcuacagauuucagaaaagccauccaaaaucaaacaaucuguagcauauaccagugaacauccgucuuucacuucagga	((.....((((((((((((((((((((((((((((((((((((.........................)))))))))))))))))))))))))))))))))))).....)).	-62.7	0.187397	0.0970019	0.222635	0.0820828	0.175604	0.131705
novel_miR_252	1.1	ccaggaagauguuggaauucacg	ugaaauacaauagcauucacugugua	1	-	6775119	6775229	aacaucuggaaugugaaauacaauagcauucacuguguagccaaccucuuagcaggguugguccuuuaccaggaagauguuggaauucacguuguggauggagugcuagag	..((((((.((((((((...(((((...(((.(((.(((((((((((.......))))))))....)))))))))..)))))...)))))))).))))))...........	-38.7	0.0936986	0	0	0.0410414	0.175604	0.131705
novel_miR_469	58.7	aggcuucuguagaucagccagc	ugguugauccauuggaagacuga	4	-	10929457	10929568	ugcugcagugugaauuaguucaucugguugauccauuggaagacugagcuugagggugaaagagguaaacaggcuucuguagaucagccagcugaccugauucaucuuacuc	.........(((((((((.(((.((((((((((...((((((.(((.((((...........))))...))).))))))..)))))))))).))).))))))))).......	-38.3	0.562192	0.679013	0.578851	0.533538	0.614615	0.482919
novel_miR_118	3.1	ccucccgcaccgccuguacgcc	cgugcgggcgcugcgggagccc	9	+	4872126	4872237	gcgcuggcguucuccccgcgccucccgcaccgccuguacgccgcgcacggggcggccguggcgcugcuggacgugcgggcgcugcgggagcccguggagcgccuccgcuuca	(((..((((((....(((((.((((((((.((((((((((((((((((((.....)))).))))....)).)))))))))).))))))))..)))))))))))..)))....	-71.2	0.0468493	0.194004	0.356216	0.0410414	0.219505	0.175607
novel_miR_330	2.3	cugggcucagaaccuucccaaa	ucagggaaggcucuggcccga	13	+	9759008	9759117	acagcacaggggcagcuccacugcacaguugcacacugcucagggaaggcucuggcccgaaagagacagaacugggcucagaaccuucccaaagacagugaaugugggga	...((......))..((((((((((....))))(((((((..(((((((.(((((((((.............))))).)))).)))))))..)).)))))...)))))).	-45	0.281096	0.242505	0.311689	0.0820828	0.175604	0.263411
novel_miR_339	0.1	cgggcaggggguggcggaggagg	cccccccaaucccccugcccugc	28	-	3141139	3141250	cccagcuggcagccgcuuccuccugcccccccccccccccaaucccccugcccugcgugggucguggugccgggcaggggguggcggaggaggggggggggcuucgccggga	(((.((.((.((((((........))(((((((((((((((..((((((((((.((((.(....).)))).))))))))))))).)).)).)))))))))))))))).))).	-71	0	0.145503	0.133581	0	0	0
novel_miR_597	14.8	cuaugggcucccuaugggc	cuaugggcucccuaugggu	15	-	181489	181596	augggcucucuaugggucccuaugggcucccuauggguucucuaugggucccuaugggcucucuaugggucccuaugggcucccuaugggcucucuaugggucccuau	..((((((.....(((..((((((((...((((((((..(((...((((((....)))))).....)))..))))))))...))))))))..)))...))))))....	-46	0.0468493	0.970019	0	0.123124	0.0439011	0.0878035
novel_miR_389	6.6	aaggccuccuguguuuuaacuc	aguugaaugcaggagcuccucc	1	-	67200786	67200897	uguuuguaggcuugcacaggaaggccuccuguguuuuaacucgucacuaugaguugaaugcaggagcuccuccugugcauucacacaccuguggaugacuuugccgacugaa	..((.((.(((...(((((((.((.(((((((((((.(((((((....))))))))))))))))))..)))))))))((((((((....)))))))).....))).)).)).	-45.8	0.140548	0	0	0.0410414	0.219505	0
novel_miR_76	2.4	ugcagcgcuuccucguggguc	cucucgggggccgcuguccgucc	24	+	320215	320324	ccaucgcggggccgggugggugcagcgcuuccucguggguccuuugaccuuucucgaggcucucgggggccgcuguccguccacauucccgcucuggcaccguuuccgcu	.....((((.((((((((((.((((((..((((((.(((.((((.((......))))))))).)))))).))))))...........))))).))))).)))).......	-46.8	0.0468493	0.0970019	0	0	0.0439011	0.0878035
novel_miR_971	2.1	ccuggaguaacucaguugagu	ucugcugauuuacaccaccaguga	14	-	2392962	2393072	gaaaccugugggccagauucccuggaguaacucaguugaguauaauggagcucugcugauuuacaccaccagugagucuggccuguguuaagcucucgggaagaaaguaag	....((((((((((((((((.((((.((((.(((((.((((........)))).))))).))))....)))).))))))))))))...........))))...........	-41.2	0.140548	0.0970019	0.222635	0.123124	0.175604	0
novel_miR_500	51.4	uuuggccaaggggaaucagauu	ucugguuuuccuuucccacagg	7	-	641735	641844	ugcacuugaagcucaauauuuggccaaggggaaucagauuuucuaccccacaggagaaauacuauucacagaucugguuuuccuuucccacaggguuuugauggaaaaga	..((.(((((((((......(((..(((((((((((((((((((.((.....))))))............)))))))))))))))..)))..))))))))))).......	-27.9	0.936986	0.970019	0.712432	0.820828	0.526813	0.526821
novel_miR_737	2.2	ugugcugggcugaggggc	gcuggcagcaggugcggu	24	+	2070480	2070589	cucaggccauaccugaugguguggucucugcauggaggagggaugcagauggauuuuugcagugcuggcagcaggugcgguuggugugcugggcugaggggcugauugcu	....(((((((((....)))))))))(((((((.........)))))))..........((((.((..((((.((((((.....))))))..)))).)).))))......	-42.6	0.281096	0.0970019	0	0.0820828	0.614615	0.175607
novel_miR_824	9723.9	uauugcacauuacuaaguugca	caauuuagugugugcgauacu	2	-	84220797	84220908	ucugcuugcucugguggagauauugcacauuacuaaguugcauguugucacggccucagugcaauuuagugugugcgauacuuucacaugagugcaugcacacggguauggc	..(((.(((.((.(((((((((((((((((.((((((((((((((((...))))....)))))))))))))))))))))).)))).))).)).))).)))............	-44.6	114.125	139.489	115.77	134.616	126.128	146.237
novel_miR_446	1.8	ugcugugaugacacugagug	cucaggcacugaagcaau	5	-	8258502	8258611	gggauggugugcagagcaguugcugugaugacacugagugcaguguggaguauauuugauaccuucuccaugagaagcucaggcacugaagcaauugggcugcaguaaga	.........(((((..((((((((....((.(.((((((....(((((((...............)))))))....)))))))))....))))))))..)))))......	-36.7	0.281096	0.291006	0.400743	0.0410414	0.439011	0.0878035
novel_miR_602	0.1	cuaggugaugacugaacuuc	gguuuagugguggacuuggaa	5	+	49301491	49301598	cccuggagauauuuaggagaaauauggauguauugcucugggagaugguuuagugguggacuuggaagugcuaggugaugacugaacuucaugaucuuaaggaucuuu	(((((((((((((((.........)))))))....))))))).)..((((((((.((..((((((.....)))))).)).))))))))....(((((...)))))...	-27.7	1.03069	1.21252	1.91466	1.92895	1.05363	0.790232
novel_miR_865	109491	uggaagacuagugauuuuguuguu	caacaaaucacagucugccaua	Z	-	40089570	40089683	gauguuggucuaguucuguguggaagacuagugauuuuguuguuuuuagauaauuaaauugacaacaaaucacagucugccauauggcacagaucaugccucuacaggacaagu	.....((((((.((.((((((((.(((((.(((((((.((((((((((......))))..)))))))))))))))))).)))))))).))))))))(((((....))).))...	-38.8	644.74	555.772	397.403	438.076	575.016	704.667
novel_miR_297	17.6	uuggguggacgguuggacuuga	uuuuccaaccuucuuccccccu	21	-	5009951	5010061	guuagugggcaugguggaguuggguggacgguuggacuugaugguuguaguggucuuuuccaaccuucuuccccccuucacuauuccaugguucucugauccaucacacug	..(((((((.(((((((((..(((.(((.(((((((...(((.(......).)))...))))))).))).)))..))))))))).))((((.((...)).))))..)))))	-40.7	0.234247	0.242505	0.311689	0.205207	0.219505	0.219509
novel_miR_114	2.1	caucuggaguacugcauc	agcagguccagaggag	20	-	13438162	13438278	uucugcccauccauucugcucuugugaggccccaucuggaguacugcauccaguucuggagcccucaacacaagaagggcauugagcuguuggagcagguccagaggagggccauaa	....((((.(((......(((....)))......((((((...((((.(((((..((.((((((((.......).))))).)).))...))))))))).))))))))))))).....	-41.6	0.140548	0	0.089054	0.0820828	0	0.0439018
novel_miR_21	1.9	ugcggucgcauagagcugggcagc	ugcaagacuuuaugugcccuccucacu	12	-	10897654	10897764	gcugcuuaaauauacaagcaaucagcaucucugcaagacuuuaugugcccuccucacugugcagaagcacugcggucgcauagagcugggcagcagauacagcugacugcu	................((((.(((((((((((((.((.(((((((((....((.((..((((....)))))).)).)))))))))))..)))).))))...))))).))))	-37.7	0.140548	0	0.222635	0.205207	0	0
novel_miR_558	155.7	uggguucccugagcuguucagc	uguucagcauuggguucccugu	30	+	54151	54259	gguucccugacucauucagcauuggguucccugagcuguucagcauuggguucccugucucauucagcauuggguucccugagcuguucagcauuggguucccugaggc	......((((.....))))....(((..(((...((((..((((...(((..((((((........)))..)))..)))...))))..))))...)))..)))......	-39.2	1.45233	0.727514	1.24676	0.615621	0.482912	0.570723
novel_miR_805	2.6	ugcucggcgcagaucgcggucgug	caccgccgcguccugcgccgguggc	24	+	232906	233018	ccgcgcugcgcccacggagcggcacccaccgcgcugcaccgccgcguccugcgccgguggcguugggcgcugcucggcgcagaucgcggucguggcugcgcugggagcgcuga	...((((.((....)).))))((.((((.((((((((...((((((..(((((((((((((((...))))))).))))))))..)))))).))))).))).)))).)).....	-68.4	0.187397	0.145503	0	0.0820828	0.0439011	0.0439018
novel_miR_573	2.2	ugaggaucacagaaucauugc	agugauccugugaggaucacc	4	-	63071624	63071734	ucuaucuagcucauggcaauguuauucagaggcagugauccugugaggaucaccaguuaguuacaaucugugaggaucacagaaucauugccucuggauuucacucaacuu	........(((...)))..((..((((((((((((((((.((((((...((((.((...........))))))...)))))).))))))))))))))))..))........	-42.2	4.21644	3.54057	2.40446	3.44748	4.0389	4.69749
novel_miR_753	1.4	cagaaucgcagaauggcugagg	gaccauucuaugauucucugauucu	1	-	107174354	107174465	gaacuggauuaucuuuaaggucccuaccaacccggaccauucuaugauucucugauucuaaaaguuaucacagaaucgcagaauggcugaggcugaaagagacaucuggauc	..........((((.....(((.((..((.(((((.(((((((.(((((((.((((..........)))).))))))).)))))))))).)).))..)).)))....)))).	-33.4	0.0468493	0.145503	0.044527	0.0820828	0.131703	0.131705
novel_miR_153	2.1	cuccucuggaccugcucc	acgcaguacuccaggugggg	1	+	63103029	63103137	gcccucugauuaccuugguggcccuccucuggaccugcuccaaguucuugaugaucuuguguuggagguccuggaacuggacgcaguacuccagguggggucucaugag	...((((((..........((((((.(.(((((.((((((((.(((((....((((((......))))))..))))))))).))))...)))))).))))))))).)))	-40.8	0.140548	0	0	0.164166	0.219505	0.131705
novel_miR_579	2.3	ugucuacacuggaagcugcaugc	cuuggcagcucagcuguggcaugaca	1	-	7891799	7891909	uuaacucucaccugaaggguuucugggugcuuggcagcucagcuguggcaugacaaguagaacuaaucugucuacacuggaagcugcaugcacucagaacucuuuggacac	...........((((((((((.((((((((...(((((((((.(((((((.((..(((...)))..)))).))))))))..))))))..))))))))))))))))))....	-44.2	0	0	0	0.164166	0.175604	0.439018
novel_miR_894	56.3	ccgcgccggagcugcgggugccg	ucccccagacccgcgccgccg	12	+	12044494	12044602	gggugaacgcggagccccgcuccgcccgggggucccccagacccgcgccgccggggccaccacggagcggccgcgccggagcugcgggugccgccgugcggaggugagc	((((.........))))..((((((.(((.(((.((((((..((((((.((((...((.....))..)))).))).)))..))).))).))).))).))))))......	-58.5	0.936986	0.582011	1.55844	0.533538	0.702417	0.74633
novel_miR_91	2.6	ucucacugcuccucuuuccucaga	ugcaggcagggggugugggg	27	-	7681367	7681479	gggcuggcugggaggugcucugcaggcaggggguguggggagcauggagggcucagggcugcacagcuccucucacugcuccucuuuccucagaugauccagaccagccggac	...((((((((..((..(((((.(((.((((((((.(((((((.((...((((...))))...))))))))).)))....)))))..))))))).)..))...))))))))..	-53.8	0.468493	0.242505	0.311689	0.328331	0.307308	0.526821
novel_miR_921	34172.7	ugagguaguagauugaauaguu	uauacaaucuacugucuuuccua	26	-	1650904	1651015	ucccaagcuguccuugaggcugagguaguagauugaauaguuguggaguccuauccucccuuugagcuaacuauacaaucuacugucuuuccuaaggagacagucagaucuu	......(((((((((.(((..((((((((((((((.((((((((((((.......))))......)).)))))).)))))))))))))).))).))).))))))........	-39.2	511.969	481.614	444.958	469.309	458.986	484.456
novel_miR_778	29.6	auggggaugugaggcucagaugga	acgcugucccugcauccccaga	5	-	220984	221096	uguguugagguugauugagauggggaugugaggcucagauggaacaaggauuggccaccccucacgcugucccugcauccccagaccggccgcaucgauaagucguaccccac	..(((((((((((.((....(((((((((.(((..(((.((((....((.....)).....)).)))))..)))))))))))))).)))))...)))))).............	-31.5	0.374795	0.582011	0.578851	0.615621	0.219505	0.351214
novel_miR_815	20.1	cggauggcagaggagcgcugu	gcuuuccuccaucccugugcagu	33	+	5580136	5580245	ugcucccgaguguccguggagccguuuuccugcagcgugcccagcuuuccuccaucccugugcaguguggcggauggcagaggagcgcuguuggcugaugugcagugagg	.(((((((......)).)))))....((((((((.((((((((((.(((((((((((....((......))))))))...))))).))))..)))..)))))))).))).	-43.7	0.609041	0.242505	0.712432	0.205207	0.131703	0.0439018
novel_miR_314	0.1	aauccaaugggacucaauggga	ucaaugggacccaauggaaacc	27	-	2022230	2022338	gacccaauagaaaccaaugggacccaauagaaaucaaugggacucaaugggacccaauggaaaccaauggaauccaaugggacucaaugggagucaauggaaaccaaug	..((((...........)))).((((...........)))).((((.((((.((((.((((..((...))..)))).)))).)))).))))......(((...)))...	-28.9	0.0468493	0	0.089054	0.0410414	0	0.0439018
novel_miR_690	3.6	acagacggcuggcuacuuccuggg	ucgagucagccuccuucugcaa	9	+	23106386	23106495	uaugccuccaccugcaacucggugggacagacggcuggcuacuuccugggcaacgugcucuuccuggcccucgagucagccuccuucugcaacaaguaccugcgcuucca	......((((((........)))))).((((.((..((((((((...((((...............))))..)))).)))).)).))))....((((......))))...	-31.2	0.0936986	0.145503	0.044527	0.0410414	0.0878022	0.0439018
novel_miR_508	3.4	cucugggugcugcuggcagcucug	gagccccggcuguaucugguuc	14	+	5465875	5465986	aggauuuccuggcguacgucgugggaggagcagcucugggugcugcuggcagcucugagggggcucagcagagccccggcuguaucugguucaucucccccagauccucaga	((((((...((((....))))((((.((((..(..((((((((.(((((..((((((..(.....)..)))))).))))).))))))))..)..))))))))))))))....	-47.1	0.0936986	0	0.044527	0.164166	0.0439011	0.175607
novel_miR_303	0	cacugcucugagagccagagc	cauggcuccagccugcagugcc	11	-	6322953	6323063	gcaccaacaaaugaaggucccugccacagagcaggugcauggcuccagccugcagugccauugccucagucacugcucugagagccagagccugaccugucuggcuagacu	...............((((...(((((((..(((((...(((((((((...((((((..((((...)))))))))).))).))))))..)))))..))))..)))..))))	-44.4	0	0.0485009	0.089054	0.0410414	0.131703	0
novel_miR_908	20	aaauaguguuacugugcucu	gaugguggucacuauguugaaaaau	11	+	3463392	3463506	ucuggugaauaugcagagcagaugguggucacuauguugaaaaauaauguuuuggagaugagaauuugcucuaucaaauaguguuacugugcucuuuguuguauuuuccauggaa	..(((.((((((((((((.(((((((((.((((((.((((............(((((...........)))))))))))))))))))))).))))))).))))))).))).....	-27.6	0.749589	0.921518	0.623378	0.902911	0.834121	0.965839
novel_miR_421	1.8	gauucugccgugaaacugagc	ucaauuucacugaaaaagaaacug	1	-	189880202	189880312	aauuuucacagacaugcuucaguucauaaaggcucaauuucacugaaaaagaaacugcugcacaaagacagauucugccgugaaacugagccuuugugggccauuucaaau	.....................(((((((((((((((.((((((......((((.(((((......)).))).))))...)))))).)))))))))))))))..........	-36.6	0	0	0.089054	0.246249	0.0878022	0.0878035
novel_miR_293	14.3	cgcguguucggcggcgggacgg	uucccgucuccgagcagcgcc	28	-	970776	970886	cagaaggacggagcccagcacagcucggggaacgccuucccgucuccgagcagcgccggagggcagagggcgcguguucggcggcgggacggcgguguccccgcggcagcc	.....((......))..((...(((((((((.((((.(((((((.((((((((((((...........))))).))))))).))))))).))))...)))))).))).)).	-61.4	0.234247	0.194004	0.133581	0.0410414	0.219505	0.351214
novel_miR_600	1.9	ucagcacuuccugucucugcagg	ccgggaggaaggagagugggg	22	-	149955	150066	cacacucuuuauuccaacgcugcucuguguggugccgggaggaaggagaguggggggcucucccagucccucagcacuuccugucucugcaggcgccucacugaagcuguca	..................((.((((.(((.((((((.(((((.(((((..(((((((((.....)))))))))....))))).)))))...)))))).))).).))).))..	-45.1	0	0	0.133581	0	0.175604	0.175607
novel_miR_847	2.5	cagaucugcgccuucuggacc	gucagggggauguggggaugug	31	+	2212563	2212673	gguccuuaugggguccuuaugggguugggagguccuuauggggucagggggauguggggauguggggucacagaucugcgccuucuggacccacuuccugccccagcugcu	((.(((....))).))...((((((.(((((.......((((..(((((((.((((((..((((....))))..)))))))))))))..))))))))).))))))......	-49.9	0.327945	0	0	0.246249	0.439011	0.219509
novel_miR_648	0.7	gguggacgcggaguggcuguca	acagccgcuccgcguccacccg	20	+	10075730	10075840	uacagcccagcaggacagcaggcuggcagugacagccgcuccgcguccacccgggggguuguuccccccggguggacgcggaguggcugucacugcccugaugggacaggg	..(((((..((......)).)))))(((((((((((((((((((((((((((((((((.....)))))))))))))))))))))))))))))))))((((......)))).	-96.1	0.0936986	0.0970019	0.089054	0.0820828	0.0439011	0
novel_miR_278	1.8	ugugcugccacuacuaugagcu	uccauagaguggcaacaugug	1	+	75693185	75693295	caccauuacuggugaugagaugugcugccacuacuaugagcuggaaucaaaacugcaguccauagaguggcaacaugugaaauccucaucaaacuaggaaguucaagaugc	........((((((((((((((((.(((((((.(((((.((((.(........).)))).)))))))))))).)))))......))))))..)))))..............	-36.4	0.281096	0.388007	0.044527	0	0.219505	0.175607
novel_miR_943	41.2	agcccgugggugcugcagacgu	ucugcagcaaucagagggcugu	19	+	5046157	5046268	acagguguuuugucucuaacagcccgugggugcugcagacguuacaugucuccuucuggugugucugcagcaaucagagggcuguuggugugaauccaacuccaaaucugau	...((.(((...((.((((((((((.(((.((((((((((..(((..(.......)..))).)))))))))).)))..))))))))))...))....))).)).........	-43.6	0.515343	0.485009	0.311689	0.615621	0.439011	0.395116
novel_miR_572	42.3	cugcugggaauacugaguaagg	ugcucaguauugcagacagcug	2	+	138851754	138851862	guguggauucugccagcauuaaauugugagugcuuugcucaguauugcagacagcuguuacugucucuagcugcugggaauacugaguaaggcacucccaccaggauuu	.....(((((((...(((......)))(((((((((((((((((((.(((.((((((..........)))))))))..)))))))))))))))))))....))))))).	-46	0.421644	0.485009	0.222635	0.656663	0.614615	0.790232
novel_miR_564	16	ugggccguggggcuacgggaagc	acccugcaguacauggcccccg	23	-	2050507	2050619	uagggggggcuucaucccucccgccccccccaggcacccugcaguacauggcccccgaaaucaucgaccgugggccguggggcuacgggaagccggcggauaucugguccuug	..((((((((............))))))))..(((..((((.(((.((((((((.((...........)).))))))))..))).))))..)))...((((.....))))...	-52.1	0.0468493	0.194004	0.133581	0.410414	0.0439011	0.131705
novel_miR_335	1.2	cauugcugggugcucugcagc	agcagggcagugcucccagcucugcu	5	+	8273633	8273743	gauucugugaaggagcacaggcuaggcugcaagcagggcagugcucccagcucugcucagcaagcagcagcauugcugggugcucugcagccagcauggcugggugcucug	...........(((((((.(((((.((((...((((((((.....((((((..((((..((.....))))))..))))))))))))))...)))).)))))..))))))).	-54.6	0	0.0485009	0.267162	0	0.0878022	0
novel_miR_191	2464.4	gcaucucuggacgcgcucguuc	gcggcgcgagcagagaggcgcug	11	-	18630360	18630471	ccugcacggcuccuuagucacugcguggggguggcggcgcgagcagagaggcgcugccguguccaaagcagcaucucuggacgcgcucguuccuucugcguggcuccgcuug	......(((......((((((.(((.(((((.(((((((((..((((((...(((((..........))))).))))))..))))).)))))))))))))))))))))....	-49.8	41.977	37.1032	34.4194	31.3556	37.7988	34.0678
novel_miR_937	0.8	uauuuuagccugaaucagcucaga	uaaggcugauuugcuaaaauuuu	3	+	4069095	4069208	agcaacagaacaaggcucugcccugcuuuugcuaaggcugauuugcuaaaauuuuagaagauaagaacuauauuuuagccugaaucagcucagacaaagacaggaugaacacag	.....((((.......)))).((((.(((((((..(((((((((((((((((..(((..........))).))))))))..))))))))).)).))))).))))..........	-30.1	0	0.242505	0	0.533538	0.307308	0.131705
novel_miR_649	2.6	ugcugcugaacaccacagacug	ggcugcugaugggcagcagcugg	9	-	1841105	1841216	guuguguggcagcaucagcucugcccaggcugcugaugggcagcagcuggcaccuggcauccaaggggccugcugcugaacaccacagacugggccgugcuguaacugagga	.........(((...((((.(.((((((.(((.((.((..(((((((.(((.(((((...)).))).))).)))))))..)).))))).)))))).).))))...)))....	-55.2	0.515343	0.0485009	0.133581	0	0	0
novel_miR_783	0.9	gauacuguugauuuggau	ucugacuguguucuauuu	Z	+	68732363	68732470	cuguuaaaccacugagcugugauacuguugauuuggauucagucccccagucugacuguguucuauuucagugguuuaaacaaagaguuuuuuugucucuggcuucuu	...(((((((((((((.((.(((((.(((((((.((((...))))...)))).))).))))).)).)))))))))))))(((((((...)))))))............	-30.6	0.187397	0.242505	0.133581	0.123124	0.0439011	0.131705
novel_miR_846	0.9	acugagcugugcucguacugugc	auggugccugcugcucugcuccuugg	26	+	2548875	2548987	caugcagcacccagugccucacugagcugugcucguacugugccugccugccuugccugggcauggugccugcugcucugcuccuuggggugcugagcuaauggaguucugcc	(((..(((...((((((((((..((((.((((..(((((((((((((.......))..)))))))))))..)).))...))))..)))))))))).))).)))..........	-44.7	0.187397	0.0485009	0.044527	0.0820828	0	0.0439018
novel_miR_214	14.4	cugggacguggagggagggc	cucaugcagucgcucuuaau	14	-	2677561	2677669	ugcugcgaggaaaguuuggcugggacguggagggagggcccuugggauaaacacagagcccucaugcagucgcucuuaaugauuucucuauuuuccuacaugcaaaaaa	(((((..((((((((((((..(.(((.((.(..((((((.((((.......)).)).)))))).).))))).)..))))..........)))))))).)).))).....	-29.5	0.281096	0.242505	0.044527	0.246249	0.570714	0.175607
novel_miR_284	166221	uaacacugucugguaacgauguu	caucuuacuagacagugcugga	21	-	2601062	2601174	cagcugcuggacagacagugguccucugugggcaucuuacuagacagugcuggauuucuuggaucuauucuaacacugucugguaacgauguuuaaagggugaaccaaacaac	...((((((......))))))((((((.(((((((((((((((((((((.((((..............)))).))))))))))))).)))))))).)))).))..........	-43.1	1689.2	2136.71	2582.83	2017.56	1928.71	1805.2
novel_miR_709	1.2	ucggacuguggcaggcuucccagu	ugaagggcuugcacagcugaaa	8	-	16950003	16950116	cuacagugaugcuguggacuucggacuguggcaggcuucccagucuuaacaggucugaagggcuugcacagcugaaaucugcagaauugccacgcugaacagaaauuggguuuu	.....(((((.(((((((.(((((.(((((.(((((((..(((.(((...))).)))..))))))))))))))))).))))))).)))))...(((.((......)).)))...	-40.1	0.0468493	0.0485009	0.222635	0.0410414	0	0.0878035
novel_miR_710	579	ugcacuugaauggaguucugggu	uccugaaucccuucaagugg	2	-	61629301	61629413	gcuccuccuccagggugcugugcacuugaauggaguucuggguguucucauggauccugaaucccuucaaguggacaaaacguugggcauuaaucugcaguaggcuguggagu	........(((((.((..(((.((((((((.((.((((.((((.(......).)))).)))).)))))))))).)))..)).)))))......(((((((....)))))))..	-42.1	10.5411	4.70459	7.7477	9.60369	9.08753	8.16573
novel_miR_659	1.3	auagcccuguacaaugcugcu	cagcacuguaaagaagccgaag	13	-	5439983	5440093	agagaagacucagugccuucauagcccuguacaaugcugcuugauccauaugcaacaaggcagcacuguaaagaagccgaaggcagcaagacagauguucuuuucaucuuc	.(((((((((...(((((((...((.((.((((.((((((((...............)))))))).)))).))..)).)))))))...))........)))))))......	-32.6	0.0468493	0.0970019	0.044527	0	0.131703	0
novel_miR_18	1	aaauguggugugcucugaugc	caacgggugaagcuacagc	1	+	139391671	139391781	guuuguaccuccugccugacuggcaggcaaacagcaacgggugaagcuacagcaguguguucucuuauaaaaauguggugugcucugaugcagacucaaucaaaaauaaau	(((((.....((((((.....))))))))))).(((.((((((..((((((....((((......))))....)))))).))).))).)))....................	-28.8	0	0	0	0.0820828	0.0439011	0.263411
novel_miR_144	2.3	uuccuggcuugugcugucgacc	gcggcugcaaagcacaggaggg	10	+	19832943	19833054	agugcccccggugcuuugcaaaacgugggcgugugugcggcugcaaagcacaggagggcuuuucuuccccuuccuggcuugugcugucgacccacgagcucaaaaaacaaau	((((((...))))))..........(((((.((((.(((((.(((((((.((((((((..........)))))))))))).))).)))).).)))).)))))..........	-44	0.281096	0.242505	0.400743	0.0820828	0.0878022	0.131705
novel_miR_850	65723.8	uuuggcaaugguagaacucacacu	ugguucuagacuugccaacu	1	-	1478684	1478797	uucuuccuguccuggcugcuuuuggcaaugguagaacucacacuggugcgcucgcaggauccggugguucuagacuugccaacuacagccccgggaaccuccacggauacaucu	.............(((((...(((((((...((((((...((((((..(........)..))))))))))))...)))))))...)))))((((((...))).)))........	-40.1	861.231	925.98	939.608	883.704	1116.8	1013.52
novel_miR_681	694.3	ugcgcguggcgccgagcucgg	agagcgcgagcguggcgcggcggc	9	-	16141547	16141657	cgcgcggcugagcggcggcggcggcggcggcggcgccagagcgcgagcguggcgcggcggcgagaggagcugcgcguggcgccgagcucgggacugcccggcggggccgcc	..(((.((...)).)))(((((..((.((((((..((.((((.((.((((.(((((.((((.......))))))))).)))))).))))))..))).))).))..))))).	-68.2	7.82384	9.65168	8.9054	11.4916	9.39483	13.3461
novel_miR_233	2.4	ccccgucugugccacucacacu	gguggguggugcggggug	22	-	595886	595997	ugccccgaagugacuuugcggagaugauucggcagguggguggugcgggguggcucagcacccaugguagccccgucugugccacucacacucccucuucuccucacagggc	.((((....((((......(((((.((...((.((((((((((((((((((.((.((.......)))).)))))))....))))))))).)))).)).))))))))).))))	-48.5	0.936986	0.679013	0.578851	0.28729	0.219505	0.74633
novel_miR_518	1.8	cuccaaggcuguuuccucuga	agaggcacugaaccuuggcaggu	5	-	51799313	51799423	ugugcgugcauuguaaccagcagagagucucagaggcacugaaccuuggcagguuuuaaaccugagggaccuccaaggcuguuuccucugaauuuugaugcuguuuucacu	..((((.....))))..(((((..(((..(((((((.((....((((((.(((((((........)))))))))))))..))..)))))))..)))..)))))........	-36.3	0.0468493	0.242505	0.311689	0.123124	0.131703	0.219509
novel_miR_635	16.8	ccgggcagggccgagcugagc	cccggcccccgcccugccccgc	1	+	72032680	72032790	ggucgcaggcugccgccgggcucgugccgcggcccggcccggcccccgcccugccccgccucacgugccgccgggcagggccgagcugagccgggccgggcgccucgccag	(((.(((...))).))).(((..(((((.(((((((((.((((.(..(((((((((.((..........)).))))))))).).)))).))))))))))))))...)))..	-71.3	0.187397	0.388007	0.311689	0.28729	0.0878022	0.263411
novel_miR_70	1.7	cgggaggagcgcggugggugg	ccccucccugucuccccccuc	33	-	3355910	3356020	caaaagccuuucgaauggaacgggaggagcgcggugggugggugcuggcgcugacccccccucccugucuccccccucccccaggcagcagccuccugacggggccugaag	.....((((...(...(((..(((.((((((.((.(((.((((((....))..)))).))).)).)).))))))).))).).))))..(((.((((....)))).)))...	-42.9	0	0	0.044527	0.0820828	0	0.0878035
novel_miR_756	2.5	cugcuggcugugcacgaggagc	uccuugugcucagcuggggcagcc	14	+	13805413	13805524	cugcaguugguguuucgaggggugcugcucuccuugugcucagcuggggcagccgaggaaggcaggagggcugcuggcugugcacgaggagcauuucacucuugccuucaca	.........(((.....(((((((.....((((((((((.(((((..(((((((..............)))))))))))).)))))))))).....))))))).....))).	-50.6	0.281096	0.582011	0.623378	0.451456	0.482912	0.219509
novel_miR_239	1.1	uacuuccuuuucuaucugcaga	ugcagcugggagaggagauccu	17	+	5231155	5231265	augcugaacauucuguaaugcagcugggagaggagauccuggcaaccaucaguucuguacuuugauguccuacuuccuuuucuaucugcagacaguaaccugcgguuguuu	..((((......((((..(((((.(((((((((((.....((....((((((.........)))))).))...))))))))))).))))).)))).......)))).....	-31.4	1.21808	1.30953	1.38034	1.02604	1.18533	0.878035
novel_miR_614	1.9	ccugugcugaggacuccacaucu	augaggucccaccagugcagagua	3	-	80130530	80130644	uccaacagguccauaucucuccugugcugaggacuccacaucugaaugcaauauuccagaugaggucccaccagugcagaguagaggagcaggaucacaucucuugacgugcugg	.....(((((((...((((((((((((((.(((((...((((((((((...)))).)))))).)))))...)))))))).).)))))....))))(((.((....)).)))))).	-37.7	0.234247	0.0485009	0.044527	0.28729	0.39511	0.307312
novel_miR_700	2.3	ugcuuucgcuugcucuguggga	ccgcagagcaaugggcgaugagggg	2	-	111202583	111202694	agcgcacgcugcuuucugcgugcuuucgcuugcucugugggaaaacggcgugccuuucuuucuuccgagugccuucccgcagagcaaugggcgaugaggggaaaagccgcgu	.....((((.(((((((.(......((((((((((((((((((...((((.....(((........))))))))))))))))))))...)))))...).)).))))).))))	-45.6	0.187397	0.0485009	0.222635	0	0	0.175607
novel_miR_976	1.2	cacucgggcuccaggcuguagu	cacggccucggagccggcguccu	5	-	666133	666244	cccggcugggccccucccagcacucgggcuccaggcuguaguccagcuccucguacacggccucggagccggcguccuggcuggggccugcgaacagcacgcgugucaccac	..((((((((((((..((((.((.(.(((((((((((((.((.(........).))))))))).)))))).).)).))))..))))))......)))).))...........	-55	0.140548	0.0485009	0.133581	0	0.0878022	0
novel_miR_664	11.7	aggagaguugugaacguggaug	ccuguucauguucucuccagg	Z	-	40786939	40787051	aauuuuacaaaacaaaauuuuaggagaguugugaacguggauggaaguuugcaacuacucaccuguucauguucucuccaggucacagugcaucaaucagaugaaggaauuaa	......................((((((.((((((((.((.(((.((((...)))).).))))))))))))..))))))...........((((.....))))..........	-23.8	0.234247	0.145503	0.311689	0.205207	0.0878022	0.263411
novel_miR_11	6.6	uuucacucucagcaggcuccgca	aagugccugcugugagugaaauu	1	+	145954965	145955076	ugugguagugcuucaccugcaagugccugcugugagugaaauugucugagcuggugccgcacuuuaucaauuucacucucagcaggcuccgcaggugaaguauuucauugca	.((((.((((((((((((((....((((((((.(((((((((((...(((.((......)))))...))))))))))).))))))))...))))))))))))))))))....	-61.5	0	0	0	0.164166	0.0439011	0
novel_miR_245	0	aaagcuggauucucuguggaaa	uccacaguauacuccaguugcuu	19	+	6580291	6580399	gaugcuugugggcucugcugccucagcuauuuccacaguauacuccaguugcuuugauuuauuuguuggaaaaagcuggauucucuguggaaaaugucugugaguaauc	..(((((..((((......))))((((..(((((((((.....(((((((..((((((......))))))...)))))))....)))))))))..).))).)))))...	-32.6	0	0	0	0.0410414	0.307308	0.0439018
novel_miR_268	0.3	cgggaggaccaaugggaggacu	ucccuuguuggcuccuccccca	KZ626837.1	-	1755222	1755334	gagguggcgcccccugcaggucgggaggaccaaugggaggacuaguggagcccgccucucauuggucccuuguuggcuccucccccaggugggcggagucccguacgacaccc	..((((.(((((((((......(((((((((((((((.((((((((((((.....))).))))))))))))))))).))))))).)))).)))(((....)))..)).)))).	-57.8	0.0936986	0.0485009	0.089054	0.0820828	0	0
novel_miR_90	0.6	ugcugggagcuguagucu	acuacacuucccagcagg	18	+	4605889	4605996	cugggugcugccagcagagcugcugggagcuguagucugcaucagguccuggcagacuacacuucccagcaggcagugagggaacggaaaggaacggcugggccuucc	((((......)))).....((((((((((.((((((((((..(((...))))))))))))).)))))))))).....(((((..(((..........)))..))))).	-51.7	0	0	0.089054	0	0.0878022	0.0439018
novel_miR_340	9.2	cauagagaguauuuugaau	aaaaaugcucaucugugaaacaca	2	-	37814196	37814306	auaggccuccaacugugguaucauagagaguauuuugaauugggucaaauuuaaggcgcagacucaacugaacaaaaaaugcucaucugugaaacacaguaaaaucaaagg	...........((((((...((((((((((((((((...(((((((..............)))))))........))))))))).)))))))..))))))...........	-30.2	0.0936986	0.145503	0	0	0	0
novel_miR_662	0.8	ucuucagacacggcgggcagagc	ggugccggcagugccugcagcga	20	-	10871109	10871220	caucggcgcugucccguaggggaugcccacaccggugccggcagugccugcagcgaugcaguccgugcaucucuucagacacggcgggcagagcccggggagcgcugauggg	(((((((((((((((....))))).......((((((((.((.(((.(((.((.((((((.....)))))).)).))).))).)).))))....))))..))))))))))..	-57.9	0.0936986	0.0485009	0.044527	0.123124	0	0.0439018
novel_miR_624	19.3	cucauuagaagucagcucugga	cagagcuaacuucuaaugaggu	1	+	101381582	101381692	uccaaagacaauuccuggaccucauuagaagucagcucuggaagauacauauccagagcuaacuucuaaugagguccaggaauuguaguaucucuguuugucauagcccaa	.......(((((((((((((((((((((((((.(((((((((.........))))))))).))))))))))))))))))))))))).......((((.....)))).....	-60.4	0.468493	0.291006	0.267162	0.123124	0.131703	0.131705
novel_miR_353	21.6	uuuucccucucugugcaguucugu	agauggacagauagggugagga	2	-	145646138	145646249	ggaugugaauuucguccuccuuuucccucucugugcaguucuguccuaacugacuucgugcagauggacagauagggugaggaggacagacaaucugucuugaccccaaauc	.............(((((((((..((((.(((((.((..(((((.(...........).))))))).))))).)))).)))))))))(((((...)))))............	-39.1	0.187397	0.53351	0.089054	0.164166	0.307308	0.439018
novel_miR_699	2.4	ucuuuuugcggucugggcuugc	aagcccuuaccccaaaaagcauu	5	+	21753601	21753712	cagacuuuguccuucgcgaaucuuuuugcggucugggcuugcuguacauaacuaccuacccgggaagcccuuaccccaaaaagcauucgcggagggcgcauucgccgaagga	..((...(((((((((((((((((((((.(((..((((((.(((................))).))))))..))).))))))).))))))))))))))...)).........	-48.9	0.281096	0.194004	0.178108	0.28729	0.219505	0.307312
novel_miR_510	1.1	uugucucucucucucugcaga	ugcagaaguggaaagggaccagca	18	-	4180489	4180598	uuucccugaguaauuucagccugcagaaguggaaagggaccagcagucauuuugugcugucagcagcuuguugucucucucucucugcagauccugauucacauuggcuu	.....((((......((((.(((((((...(((.((((((.(((((.........((((....))))))))))))))).))).)))))))...))))......))))...	-31.3	0.140548	0.0970019	0	0.164166	0.131703	0.0878035
novel_miR_97	12.4	gggaguucagcugugcugcugc	aggagcgccucugagcuccccu	7	-	36258877	36258988	uggugcugucugugcagacucacagggcauguccugcaggagcgccucugagcuccccucugcuuccagggggaguucagcugugcugcugcagggcucugcccaucugcuu	..(((..((((....)))).))).(((((.(((((((((.(((((..(((((((((((.(((....))))))))))))))..))))).)))))))))..)))))........	-68.4	0.0468493	0.0485009	0.044527	0.123124	0.219505	0.219509
novel_miR_216	41	auacuggucuguacuggucugu	uggucuguacuggucuauac	15	+	131725	131842	ucugugcucaucuauacuggucuguacuggucugugcucaucuauauuggucuauaauggucuguacuggucuauacuggucugcgcucaucuauaccgcucuguacugguccaugcc	...((((..(((..((.(((.((((((.((.((((....(((......))).....)))).)))))).)).)))))..)))..))))........((((........)))).......	-18.1	0.421644	0.145503	1.73655	1.51853	3.07308	1.79997
novel_miR_158	2.4	ugcugaaauuguugcugggagc	ucccagcugcaguggccacgcu	17	-	1738498	1738608	acuauucagugcuuuucacaccucgccaggcucccagcugcaguggccacgcugcugaagugggaacagugcugaaauuguugcugggagcucuguggggcggcuugcgcc	........((((......(.((((((..((((((((((.(((((..(..(((((((......))..)))))..)..))))).))))))))))..)))))).)....)))).	-47.7	0.562192	0.0970019	0.089054	0.164166	0.0878022	0.351214
novel_miR_34	1.8	ucuugggacuggugcucuuca	uggaggccagucacaagugg	3	+	102911099	102911213	uauaugcugugaucaguggaucuuugucaggguggaggccagucacaaguggugucccacagggaucgaucuugggacuggugcucuucaacauauucaucaaugacauagacga	....(((((....)))))..(((.(((((.((((((((((((((.((((....(((((...)))))....)))).))))))).)))...........))))..))))).)))...	-37.2	0.421644	0.145503	0.133581	0.656663	0.351209	0.614625
novel_miR_17	1.3	ugguuggacuggaugauc	cagucuuuuccaaccucu	8	-	5524737	5524850	aaggccaccuaaaacccggccccaaggagcaguuggcuggaagcacacgaggcuuucaccuggcuuguuaaauugaugguuggacuggaugaucucagucuuuuccaaccucua	..((((...........))))..((.((((....((.(((((((.......)))))))))..)))).)).....((.(((((((..((((.......))))..)))))))))..	-35.3	0.140548	0.0485009	0.044527	0.205207	0.307308	0.175607
novel_miR_889	2.4	uacagcacggcugaccucagc	uggggccagucugcaugcu	28	-	1572146	1572256	uggggcaauggaguauaggcugguggagcacuggggccagucugcaugcugcccuguauugggauugugguacagcacggcugaccucagcccucuaucaccaauggcccc	.(((((.......(((.((.((((((((..((((((.((((((((.(((((((((.....)))...))))))..))).))))).))))))..)))))))))).))))))))	-46.7	1.82712	0.485009	0.534324	0.86187	1.18533	0.834134
novel_miR_271	2.1	uuggugcugagugcucugcucu	caaaagaucacucagcaccuguc	7	-	29958048	29958157	ggugcugugcaucuuuugcuuggugcugagugcucugcucuuuucauuuugacagaagcaaaagaucacucagcaccugucaggaugugcuuacgcaacagcaacuaaau	((((((((((((.(((((...(((((((((((.((((((((..(((...))).)).)))...))).)))))))))))...))))).)))).......))))).)))....	-40.4	0.421644	0.53351	0.089054	0.28729	0.263407	0.175607
novel_miR_735	0.8	uauugaggucuucugcauuc	uugcagaagauccaaggaa	1	+	64911439	64911552	uugccacaugugguguggauugcagaagauccaaggaaccuacuggaaacuuacguggcucauccuccuuauugaggucuucugcauuccauccucucugagaacugucuuggc	..((((....))))(((((.(((((((((((((((((..((((.(........)))))....))))......)).))))))))))).))))).....((((((....)))))).	-35.9	0	0.0485009	0	0.164166	0	0
novel_miR_923	9667.3	ugugcgguugcagaagaagaaga	uuccucuucucuuccgccccagg	19	-	187488	187600	cccuuccucgggacagugccugugcgguugcagaagaagaagaccggcgcuucacggcuuucuuccucuucucuuccgccccaggugacuaccgcaccgaggcagccaacagg	..((.((((((..(((((((((.((((..(.((((((.((((((((........)))...))))).)))))))..))))..))))).)))...)..)))))).))........	-45.6	36.1677	33.1746	36.4676	32.0944	33.5404	33.4092
novel_miR_485	6.8	agccggggcucugcgugugcagc	agaacacacagaugugcugggagcu	14	+	14584508	14584618	ucuaccuuuggugcccccagagcagcuccacuccugcagaacacacagaugugcugggagcugugggcagcagccggggcucugcgugugcagcagaagggagcaagcaug	.....((((((.....))))))..(((((.((.((((...((((.((((.((.((((..((((....))))..)))).)))))).))))...)))).))))))).......	-50.3	0.140548	0.0970019	0.089054	0	0	0.0439018
[truncated: 628 more rows]
